# Supplementary material for: Global genome diversity of the Leishmania donovani complex
Source: bioRxiv preprint, doi:10.1101/710145, version 1 (2019-07-22)
Supplement: Supplemental Table 3 [file 710145_file05.xlsx]

## Sheet: SNPeff_Linf_vs_Ldon
Marker SNPs (i.e. fixed differences) between both species, excluding samples of putatively mixed clone origin.
All SNPs have been annotated with SNPeff.
##SnpEffVersion="4.2 (build 2015-12-05), by Pablo Cingolani"
##SnpEffCmd="SnpEff -i vcf -csvStats SNPeff_Linf_vs_Ldon/SNPeff_Linf_vs_Ldon_stats TT38_Linf_JPCM5 /lustre/scratch118/infgen/team133/sf18/leish_donovaniComplex/A13_SNPeff_fixed_segr_cats/allSNPs_NA.frac0.2_poly_Linf_vs_Ldon.vcf "
##INFO=<ID=ANN,Number=.,Type=String,Description="Functional annotations: 'Allele | Annotation | Annotation_Impact | Gene_Name | Gene_ID | Feature_Type | Feature_ID | Transcript_BioType | Rank | HGVS.c | HGVS.p | cDNA.pos / cDNA.length | CDS.pos / CDS.length | AA.pos / AA.length | Distance | ERRORS / WARNINGS / INFO' ">
##INFO=<ID=LOF,Number=.,Type=String,Description="Predicted loss of function effects for this variant. Format: 'Gene_Name | Gene_ID | Number_of_transcripts_in_gene | Percent_of_transcripts_affected' ">
##INFO=<ID=NMD,Number=.,Type=String,Description="Predicted nonsense mediated decay effects for this variant. Format: 'Gene_Name | Gene_ID | Number_of_transcripts_in_gene | Percent_of_transcripts_affected' ">
#CHROM	POS	ID	REF	ALT	QUAL	FILTER	INFO
LinJ.01	5027	.	A	G	.	.	ANN=G	missense_variant	MODERATE	LinJ.01.0010	LinJ.01.0010	transcript	LinJ.01.0010:mRNA	protein_coding	2019-01-01	c.49T>C	p.Phe17Leu	49/1002	49/1002	17/333
LinJ.01	21258	.	A	G	.	.	ANN=G	synonymous_variant	LOW	LinJ.01.0070	LinJ.01.0070	transcript	LinJ.01.0070:mRNA	protein_coding	2019-01-01	c.798T>C	p.Ala266Ala	798/1740	798/1740	266/579
LinJ.01	21331	.	G	A	.	.	ANN=A	missense_variant	MODERATE	LinJ.01.0070	LinJ.01.0070	transcript	LinJ.01.0070:mRNA	protein_coding	2019-01-01	c.725C>T	p.Ala242Val	725/1740	725/1740	242/579
LinJ.01	22084	.	G	C	.	.	ANN=C	intergenic_region	MODIFIER	LinJ.01.0070-LinJ.01.0080	LinJ.01.0070-LinJ.01.0080	intergenic_region	LinJ.01.0070-LinJ.01.0080	n.22084G>C
LinJ.01	22725	.	C	T	.	.	ANN=T	intergenic_region	MODIFIER	LinJ.01.0070-LinJ.01.0080	LinJ.01.0070-LinJ.01.0080	intergenic_region	LinJ.01.0070-LinJ.01.0080	n.22725C>T
LinJ.01	22833	.	G	T	.	.	ANN=T	intergenic_region	MODIFIER	LinJ.01.0070-LinJ.01.0080	LinJ.01.0070-LinJ.01.0080	intergenic_region	LinJ.01.0070-LinJ.01.0080	n.22833G>T
LinJ.01	23780	.	A	G	.	.	ANN=G	intergenic_region	MODIFIER	LinJ.01.0080-LinJ.01.0090	LinJ.01.0080-LinJ.01.0090	intergenic_region	LinJ.01.0080-LinJ.01.0090	n.23780A>G
LinJ.01	23883	.	A	G	.	.	ANN=G	intergenic_region	MODIFIER	LinJ.01.0080-LinJ.01.0090	LinJ.01.0080-LinJ.01.0090	intergenic_region	LinJ.01.0080-LinJ.01.0090	n.23883A>G
LinJ.01	25597	.	T	C	.	.	ANN=C	synonymous_variant	LOW	LinJ.01.0090	LinJ.01.0090	transcript	LinJ.01.0090:mRNA	protein_coding	2019-01-01	c.387A>G	p.Ala129Ala	387/819	387/819	129/272
LinJ.01	35346	.	A	G	.	.	ANN=G	intergenic_region	MODIFIER	LinJ.01.0130-LinJ.01.0140	LinJ.01.0130-LinJ.01.0140	intergenic_region	LinJ.01.0130-LinJ.01.0140	n.35346A>G
LinJ.01	35392	.	C	A	.	.	ANN=A	intergenic_region	MODIFIER	LinJ.01.0130-LinJ.01.0140	LinJ.01.0130-LinJ.01.0140	intergenic_region	LinJ.01.0130-LinJ.01.0140	n.35392C>A
LinJ.01	43974	.	A	G	.	.	ANN=G	intergenic_region	MODIFIER	LinJ.01.0170-LinJ.01.0180	LinJ.01.0170-LinJ.01.0180	intergenic_region	LinJ.01.0170-LinJ.01.0180	n.43974A>G
LinJ.01	44005	.	A	G	.	.	ANN=G	intergenic_region	MODIFIER	LinJ.01.0170-LinJ.01.0180	LinJ.01.0170-LinJ.01.0180	intergenic_region	LinJ.01.0170-LinJ.01.0180	n.44005A>G
LinJ.01	44027	.	A	C	.	.	ANN=C	intergenic_region	MODIFIER	LinJ.01.0170-LinJ.01.0180	LinJ.01.0170-LinJ.01.0180	intergenic_region	LinJ.01.0170-LinJ.01.0180	n.44027A>C
LinJ.01	44114	.	A	G	.	.	ANN=G	intergenic_region	MODIFIER	LinJ.01.0170-LinJ.01.0180	LinJ.01.0170-LinJ.01.0180	intergenic_region	LinJ.01.0170-LinJ.01.0180	n.44114A>G
LinJ.01	47142	.	A	G	.	.	ANN=G	intergenic_region	MODIFIER	LinJ.01.0180-LinJ.01.0190	LinJ.01.0180-LinJ.01.0190	intergenic_region	LinJ.01.0180-LinJ.01.0190	n.47142A>G
LinJ.01	47943	.	T	A	.	.	ANN=A	intergenic_region	MODIFIER	LinJ.01.0180-LinJ.01.0190	LinJ.01.0180-LinJ.01.0190	intergenic_region	LinJ.01.0180-LinJ.01.0190	n.47943T>A
LinJ.01	47974	.	A	G	.	.	ANN=G	intergenic_region	MODIFIER	LinJ.01.0180-LinJ.01.0190	LinJ.01.0180-LinJ.01.0190	intergenic_region	LinJ.01.0180-LinJ.01.0190	n.47974A>G
LinJ.01	50425	.	A	G	.	.	ANN=G	missense_variant	MODERATE	LinJ.01.0200	LinJ.01.0200	transcript	LinJ.01.0200:mRNA	protein_coding	2019-01-01	c.100T>C	p.Cys34Arg	100/912	100/912	34/303
LinJ.01	61284	.	A	G	.	.	ANN=G	intergenic_region	MODIFIER	LinJ.01.0220-LinJ.01.0230	LinJ.01.0220-LinJ.01.0230	intergenic_region	LinJ.01.0220-LinJ.01.0230	n.61284A>G
LinJ.01	64610	.	T	A	.	.	ANN=A	missense_variant	MODERATE	LinJ.01.0240	LinJ.01.0240	transcript	LinJ.01.0240:mRNA	protein_coding	2019-01-01	c.829A>T	p.Thr277Ser	829/2331	829/2331	277/776
LinJ.01	70232	.	T	G	.	.	ANN=G	intergenic_region	MODIFIER	LinJ.01.0250-LinJ.01.0260	LinJ.01.0250-LinJ.01.0260	intergenic_region	LinJ.01.0250-LinJ.01.0260	n.70232T>G
LinJ.01	71436	.	A	G	.	.	ANN=G	intergenic_region	MODIFIER	LinJ.01.0260-LinJ.01.0270	LinJ.01.0260-LinJ.01.0270	intergenic_region	LinJ.01.0260-LinJ.01.0270	n.71436A>G
LinJ.01	71855	.	G	A	.	.	ANN=A	intergenic_region	MODIFIER	LinJ.01.0260-LinJ.01.0270	LinJ.01.0260-LinJ.01.0270	intergenic_region	LinJ.01.0260-LinJ.01.0270	n.71855G>A
LinJ.01	72205	.	T	G	.	.	ANN=G	intergenic_region	MODIFIER	LinJ.01.0260-LinJ.01.0270	LinJ.01.0260-LinJ.01.0270	intergenic_region	LinJ.01.0260-LinJ.01.0270	n.72205T>G
LinJ.01	72567	.	T	C	.	.	ANN=C	intergenic_region	MODIFIER	LinJ.01.0260-LinJ.01.0270	LinJ.01.0260-LinJ.01.0270	intergenic_region	LinJ.01.0260-LinJ.01.0270	n.72567T>C
LinJ.01	75999	.	C	T	.	.	ANN=T	intergenic_region	MODIFIER	LinJ.01.0280-LinJ.01.0290	LinJ.01.0280-LinJ.01.0290	intergenic_region	LinJ.01.0280-LinJ.01.0290	n.75999C>T
LinJ.01	76098	.	G	A	.	.	ANN=A	intergenic_region	MODIFIER	LinJ.01.0280-LinJ.01.0290	LinJ.01.0280-LinJ.01.0290	intergenic_region	LinJ.01.0280-LinJ.01.0290	n.76098G>A
LinJ.01	78655	.	T	C,G	.	.	ANN=C	intergenic_region	MODIFIER	LinJ.01.0300-LinJ.01.0310	LinJ.01.0300-LinJ.01.0310	intergenic_region	LinJ.01.0300-LinJ.01.0310	n.78655T>C	,G	intergenic_region	MODIFIER	LinJ.01.0300-LinJ.01.0310	LinJ.01.0300-LinJ.01.0310	intergenic_region	LinJ.01.0300-LinJ.01.0310	n.78655T>G
LinJ.01	79757	.	C	T	.	.	ANN=T	missense_variant	MODERATE	LinJ.01.0310	LinJ.01.0310	transcript	LinJ.01.0310:mRNA	protein_coding	2019-01-01	c.218G>A	p.Ser73Asn	218/1164	218/1164	73/387
LinJ.01	80099	.	G	A	.	.	ANN=A	intergenic_region	MODIFIER	LinJ.01.0310-LinJ.01.0320	LinJ.01.0310-LinJ.01.0320	intergenic_region	LinJ.01.0310-LinJ.01.0320	n.80099G>A
LinJ.01	80117	.	G	A	.	.	ANN=A	intergenic_region	MODIFIER	LinJ.01.0310-LinJ.01.0320	LinJ.01.0310-LinJ.01.0320	intergenic_region	LinJ.01.0310-LinJ.01.0320	n.80117G>A
LinJ.01	80977	.	G	A	.	.	ANN=A	intergenic_region	MODIFIER	LinJ.01.0320-LinJ.01.0330	LinJ.01.0320-LinJ.01.0330	intergenic_region	LinJ.01.0320-LinJ.01.0330	n.80977G>A
LinJ.01	81746	.	T	C	.	.	ANN=C	synonymous_variant	LOW	LinJ.01.0330	LinJ.01.0330	transcript	LinJ.01.0330:mRNA	protein_coding	2019-01-01	c.12T>C	p.Thr4Thr	12/924	12/924	4/307
LinJ.01	82259	.	C	T	.	.	ANN=T	synonymous_variant	LOW	LinJ.01.0330	LinJ.01.0330	transcript	LinJ.01.0330:mRNA	protein_coding	2019-01-01	c.525C>T	p.Ala175Ala	525/924	525/924	175/307
LinJ.01	85749	.	A	G	.	.	ANN=G	synonymous_variant	LOW	LinJ.01.0360	LinJ.01.0360	transcript	LinJ.01.0360:mRNA	protein_coding	2019-01-01	c.51A>G	p.Ala17Ala	51/777	51/777	17/258
LinJ.01	86268	.	A	C	.	.	ANN=C	synonymous_variant	LOW	LinJ.01.0360	LinJ.01.0360	transcript	LinJ.01.0360:mRNA	protein_coding	2019-01-01	c.570A>C	p.Ile190Ile	570/777	570/777	190/258
LinJ.01	91168	.	A	G	.	.	ANN=G	intergenic_region	MODIFIER	LinJ.01.0370-LinJ.01.0380	LinJ.01.0370-LinJ.01.0380	intergenic_region	LinJ.01.0370-LinJ.01.0380	n.91168A>G
LinJ.01	96016	.	C	T	.	.	ANN=T	synonymous_variant	LOW	LinJ.01.0400	LinJ.01.0400	transcript	LinJ.01.0400:mRNA	protein_coding	2019-01-01	c.2163C>T	p.Asp721Asp	2163/2451	2163/2451	721/816
LinJ.01	96632	.	T	G	.	.	ANN=G	intergenic_region	MODIFIER	LinJ.01.0400-LinJ.01.0410	LinJ.01.0400-LinJ.01.0410	intergenic_region	LinJ.01.0400-LinJ.01.0410	n.96632T>G
LinJ.01	142948	.	T	C	.	.	ANN=C	intergenic_region	MODIFIER	LinJ.01.0540-LinJ.01.0550	LinJ.01.0540-LinJ.01.0550	intergenic_region	LinJ.01.0540-LinJ.01.0550	n.142948T>C
LinJ.01	143771	.	G	A	.	.	ANN=A	intergenic_region	MODIFIER	LinJ.01.0540-LinJ.01.0550	LinJ.01.0540-LinJ.01.0550	intergenic_region	LinJ.01.0540-LinJ.01.0550	n.143771G>A
LinJ.01	144956	.	A	C	.	.	ANN=C	intergenic_region	MODIFIER	LinJ.01.0540-LinJ.01.0550	LinJ.01.0540-LinJ.01.0550	intergenic_region	LinJ.01.0540-LinJ.01.0550	n.144956A>C
LinJ.01	145097	.	T	C	.	.	ANN=C	intergenic_region	MODIFIER	LinJ.01.0540-LinJ.01.0550	LinJ.01.0540-LinJ.01.0550	intergenic_region	LinJ.01.0540-LinJ.01.0550	n.145097T>C
LinJ.01	150967	.	C	T	.	.	ANN=T	missense_variant	MODERATE	LinJ.01.0550	LinJ.01.0550	transcript	LinJ.01.0550:mRNA	protein_coding	2019-01-01	c.4757C>T	p.Ala1586Val	4757/4857	4757/4857	1586/1618
LinJ.01	151681	.	T	C	.	.	ANN=C	intergenic_region	MODIFIER	LinJ.01.0550-LinJ.01.0560	LinJ.01.0550-LinJ.01.0560	intergenic_region	LinJ.01.0550-LinJ.01.0560	n.151681T>C
LinJ.01	168461	.	C	G	.	.	ANN=G	missense_variant	MODERATE	LinJ.01.0620	LinJ.01.0620	transcript	LinJ.01.0620:mRNA	protein_coding	2019-01-01	c.309C>G	p.His103Gln	309/5454	309/5454	103/1817
LinJ.01	168478	.	T	C	.	.	ANN=C	missense_variant	MODERATE	LinJ.01.0620	LinJ.01.0620	transcript	LinJ.01.0620:mRNA	protein_coding	2019-01-01	c.326T>C	p.Leu109Pro	326/5454	326/5454	109/1817
LinJ.01	169223	.	G	T	.	.	ANN=T	synonymous_variant	LOW	LinJ.01.0620	LinJ.01.0620	transcript	LinJ.01.0620:mRNA	protein_coding	2019-01-01	c.1071G>T	p.Pro357Pro	1071/5454	1071/5454	357/1817
LinJ.01	169330	.	C	T	.	.	ANN=T	missense_variant	MODERATE	LinJ.01.0620	LinJ.01.0620	transcript	LinJ.01.0620:mRNA	protein_coding	2019-01-01	c.1178C>T	p.Ser393Leu	1178/5454	1178/5454	393/1817
LinJ.01	169369	.	A	C	.	.	ANN=C	missense_variant	MODERATE	LinJ.01.0620	LinJ.01.0620	transcript	LinJ.01.0620:mRNA	protein_coding	2019-01-01	c.1217A>C	p.Glu406Ala	1217/5454	1217/5454	406/1817
LinJ.01	169499	.	C	T	.	.	ANN=T	synonymous_variant	LOW	LinJ.01.0620	LinJ.01.0620	transcript	LinJ.01.0620:mRNA	protein_coding	2019-01-01	c.1347C>T	p.Val449Val	1347/5454	1347/5454	449/1817
LinJ.01	171867	.	C	T	.	.	ANN=T	missense_variant	MODERATE	LinJ.01.0620	LinJ.01.0620	transcript	LinJ.01.0620:mRNA	protein_coding	2019-01-01	c.3715C>T	p.Arg1239Cys	3715/5454	3715/5454	1239/1817
LinJ.01	178170	.	A	G	.	.	ANN=G	intergenic_region	MODIFIER	LinJ.01.0640-LinJ.01.0650	LinJ.01.0640-LinJ.01.0650	intergenic_region	LinJ.01.0640-LinJ.01.0650	n.178170A>G
LinJ.01	178209	.	T	C	.	.	ANN=C	intergenic_region	MODIFIER	LinJ.01.0640-LinJ.01.0650	LinJ.01.0640-LinJ.01.0650	intergenic_region	LinJ.01.0640-LinJ.01.0650	n.178209T>C
LinJ.01	178263	.	G	T	.	.	ANN=T	intergenic_region	MODIFIER	LinJ.01.0640-LinJ.01.0650	LinJ.01.0640-LinJ.01.0650	intergenic_region	LinJ.01.0640-LinJ.01.0650	n.178263G>T
LinJ.01	178763	.	A	G	.	.	ANN=G	intergenic_region	MODIFIER	LinJ.01.0640-LinJ.01.0650	LinJ.01.0640-LinJ.01.0650	intergenic_region	LinJ.01.0640-LinJ.01.0650	n.178763A>G
LinJ.01	178930	.	G	A	.	.	ANN=A	intergenic_region	MODIFIER	LinJ.01.0640-LinJ.01.0650	LinJ.01.0640-LinJ.01.0650	intergenic_region	LinJ.01.0640-LinJ.01.0650	n.178930G>A
LinJ.01	178955	.	C	G,A	.	.	ANN=G	intergenic_region	MODIFIER	LinJ.01.0640-LinJ.01.0650	LinJ.01.0640-LinJ.01.0650	intergenic_region	LinJ.01.0640-LinJ.01.0650	n.178955C>G	,A	intergenic_region	MODIFIER	LinJ.01.0640-LinJ.01.0650	LinJ.01.0640-LinJ.01.0650	intergenic_region	LinJ.01.0640-LinJ.01.0650	n.178955C>A
LinJ.01	179139	.	T	C	.	.	ANN=C	intergenic_region	MODIFIER	LinJ.01.0640-LinJ.01.0650	LinJ.01.0640-LinJ.01.0650	intergenic_region	LinJ.01.0640-LinJ.01.0650	n.179139T>C
LinJ.01	179191	.	C	G	.	.	ANN=G	intergenic_region	MODIFIER	LinJ.01.0640-LinJ.01.0650	LinJ.01.0640-LinJ.01.0650	intergenic_region	LinJ.01.0640-LinJ.01.0650	n.179191C>G
LinJ.01	179464	.	A	G	.	.	ANN=G	intergenic_region	MODIFIER	LinJ.01.0640-LinJ.01.0650	LinJ.01.0640-LinJ.01.0650	intergenic_region	LinJ.01.0640-LinJ.01.0650	n.179464A>G
LinJ.01	179799	.	G	C	.	.	ANN=C	missense_variant	MODERATE	LinJ.01.0650	LinJ.01.0650	transcript	LinJ.01.0650:mRNA	protein_coding	2019-01-01	c.317G>C	p.Cys106Ser	317/2709	317/2709	106/902
LinJ.01	179856	.	A	C	.	.	ANN=C	missense_variant	MODERATE	LinJ.01.0650	LinJ.01.0650	transcript	LinJ.01.0650:mRNA	protein_coding	2019-01-01	c.374A>C	p.Asn125Thr	374/2709	374/2709	125/902
LinJ.01	180027	.	A	T	.	.	ANN=T	missense_variant	MODERATE	LinJ.01.0650	LinJ.01.0650	transcript	LinJ.01.0650:mRNA	protein_coding	2019-01-01	c.545A>T	p.His182Leu	545/2709	545/2709	182/902
LinJ.01	180888	.	T	C	.	.	ANN=C	missense_variant	MODERATE	LinJ.01.0650	LinJ.01.0650	transcript	LinJ.01.0650:mRNA	protein_coding	2019-01-01	c.1406T>C	p.Leu469Pro	1406/2709	1406/2709	469/902
LinJ.01	182151	.	G	T	.	.	ANN=T	missense_variant	MODERATE	LinJ.01.0650	LinJ.01.0650	transcript	LinJ.01.0650:mRNA	protein_coding	2019-01-01	c.2669G>T	p.Gly890Val	2669/2709	2669/2709	890/902
LinJ.01	182345	.	C	T	.	.	ANN=T	intergenic_region	MODIFIER	LinJ.01.0650-LinJ.01.0660	LinJ.01.0650-LinJ.01.0660	intergenic_region	LinJ.01.0650-LinJ.01.0660	n.182345C>T
LinJ.01	183031	.	A	G	.	.	ANN=G	intergenic_region	MODIFIER	LinJ.01.0650-LinJ.01.0660	LinJ.01.0650-LinJ.01.0660	intergenic_region	LinJ.01.0650-LinJ.01.0660	n.183031A>G
LinJ.01	183062	.	G	C	.	.	ANN=C	intergenic_region	MODIFIER	LinJ.01.0650-LinJ.01.0660	LinJ.01.0650-LinJ.01.0660	intergenic_region	LinJ.01.0650-LinJ.01.0660	n.183062G>C
LinJ.01	183081	.	G	A	.	.	ANN=A	intergenic_region	MODIFIER	LinJ.01.0650-LinJ.01.0660	LinJ.01.0650-LinJ.01.0660	intergenic_region	LinJ.01.0650-LinJ.01.0660	n.183081G>A
LinJ.01	183166	.	T	C	.	.	ANN=C	intergenic_region	MODIFIER	LinJ.01.0650-LinJ.01.0660	LinJ.01.0650-LinJ.01.0660	intergenic_region	LinJ.01.0650-LinJ.01.0660	n.183166T>C
LinJ.01	183186	.	T	A	.	.	ANN=A	intergenic_region	MODIFIER	LinJ.01.0650-LinJ.01.0660	LinJ.01.0650-LinJ.01.0660	intergenic_region	LinJ.01.0650-LinJ.01.0660	n.183186T>A
LinJ.01	183863	.	T	G	.	.	ANN=G	missense_variant	MODERATE	LinJ.01.0660	LinJ.01.0660	transcript	LinJ.01.0660:mRNA	protein_coding	2019-01-01	c.101T>G	p.Leu34Arg	101/3333	101/3333	34/1110
LinJ.01	184761	.	A	G	.	.	ANN=G	synonymous_variant	LOW	LinJ.01.0660	LinJ.01.0660	transcript	LinJ.01.0660:mRNA	protein_coding	2019-01-01	c.999A>G	p.Gly333Gly	999/3333	999/3333	333/1110
LinJ.01	184917	.	A	G	.	.	ANN=G	synonymous_variant	LOW	LinJ.01.0660	LinJ.01.0660	transcript	LinJ.01.0660:mRNA	protein_coding	2019-01-01	c.1155A>G	p.Ala385Ala	1155/3333	1155/3333	385/1110
LinJ.01	185955	.	T	A	.	.	ANN=A	synonymous_variant	LOW	LinJ.01.0660	LinJ.01.0660	transcript	LinJ.01.0660:mRNA	protein_coding	2019-01-01	c.2193T>A	p.Ala731Ala	2193/3333	2193/3333	731/1110
LinJ.01	186190	.	G	A	.	.	ANN=A	missense_variant	MODERATE	LinJ.01.0660	LinJ.01.0660	transcript	LinJ.01.0660:mRNA	protein_coding	2019-01-01	c.2428G>A	p.Ala810Thr	2428/3333	2428/3333	810/1110
LinJ.01	186240	.	G	C	.	.	ANN=C	synonymous_variant	LOW	LinJ.01.0660	LinJ.01.0660	transcript	LinJ.01.0660:mRNA	protein_coding	2019-01-01	c.2478G>C	p.Ala826Ala	2478/3333	2478/3333	826/1110
LinJ.01	190765	.	C	A	.	.	ANN=A	intergenic_region	MODIFIER	LinJ.01.0670-LinJ.01.0680	LinJ.01.0670-LinJ.01.0680	intergenic_region	LinJ.01.0670-LinJ.01.0680	n.190765C>A
LinJ.01	191509	.	C	T	.	.	ANN=T	missense_variant	MODERATE	LinJ.01.0680	LinJ.01.0680	transcript	LinJ.01.0680:mRNA	protein_coding	2019-01-01	c.731C>T	p.Ser244Phe	731/4647	731/4647	244/1548
LinJ.01	191992	.	G	A	.	.	ANN=A	missense_variant	MODERATE	LinJ.01.0680	LinJ.01.0680	transcript	LinJ.01.0680:mRNA	protein_coding	2019-01-01	c.1214G>A	p.Gly405Asp	1214/4647	1214/4647	405/1548
LinJ.01	193120	.	T	C	.	.	ANN=C	missense_variant	MODERATE	LinJ.01.0680	LinJ.01.0680	transcript	LinJ.01.0680:mRNA	protein_coding	2019-01-01	c.2342T>C	p.Leu781Pro	2342/4647	2342/4647	781/1548
LinJ.01	195717	.	T	C	.	.	ANN=C	intergenic_region	MODIFIER	LinJ.01.0680-LinJ.01.0690	LinJ.01.0680-LinJ.01.0690	intergenic_region	LinJ.01.0680-LinJ.01.0690	n.195717T>C
LinJ.01	196297	.	A	G	.	.	ANN=G	intergenic_region	MODIFIER	LinJ.01.0680-LinJ.01.0690	LinJ.01.0680-LinJ.01.0690	intergenic_region	LinJ.01.0680-LinJ.01.0690	n.196297A>G
LinJ.01	197057	.	C	T	.	.	ANN=T	synonymous_variant	LOW	LinJ.01.0690	LinJ.01.0690	transcript	LinJ.01.0690:mRNA	protein_coding	2019-01-01	c.639C>T	p.His213His	639/909	639/909	213/302
LinJ.01	198911	.	C	T	.	.	ANN=T	intergenic_region	MODIFIER	LinJ.01.0690-LinJ.01.0700	LinJ.01.0690-LinJ.01.0700	intergenic_region	LinJ.01.0690-LinJ.01.0700	n.198911C>T
LinJ.01	198964	.	T	C	.	.	ANN=C	intergenic_region	MODIFIER	LinJ.01.0690-LinJ.01.0700	LinJ.01.0690-LinJ.01.0700	intergenic_region	LinJ.01.0690-LinJ.01.0700	n.198964T>C
LinJ.01	199552	.	A	G	.	.	ANN=G	intergenic_region	MODIFIER	LinJ.01.0690-LinJ.01.0700	LinJ.01.0690-LinJ.01.0700	intergenic_region	LinJ.01.0690-LinJ.01.0700	n.199552A>G
LinJ.01	201243	.	G	A	.	.	ANN=A	intergenic_region	MODIFIER	LinJ.01.0690-LinJ.01.0700	LinJ.01.0690-LinJ.01.0700	intergenic_region	LinJ.01.0690-LinJ.01.0700	n.201243G>A
LinJ.01	201521	.	T	C	.	.	ANN=C	synonymous_variant	LOW	LinJ.01.0700	LinJ.01.0700	transcript	LinJ.01.0700:mRNA	protein_coding	2019-01-01	c.72T>C	p.Leu24Leu	72/2406	72/2406	24/801
LinJ.01	203140	.	G	A	.	.	ANN=A	missense_variant	MODERATE	LinJ.01.0700	LinJ.01.0700	transcript	LinJ.01.0700:mRNA	protein_coding	2019-01-01	c.1691G>A	p.Arg564Gln	1691/2406	1691/2406	564/801
LinJ.01	203144	.	C	G	.	.	ANN=G	synonymous_variant	LOW	LinJ.01.0700	LinJ.01.0700	transcript	LinJ.01.0700:mRNA	protein_coding	2019-01-01	c.1695C>G	p.Ser565Ser	1695/2406	1695/2406	565/801
LinJ.01	203754	.	A	G	.	.	ANN=G	missense_variant	MODERATE	LinJ.01.0700	LinJ.01.0700	transcript	LinJ.01.0700:mRNA	protein_coding	2019-01-01	c.2305A>G	p.Thr769Ala	2305/2406	2305/2406	769/801
LinJ.01	203888	.	A	G	.	.	ANN=G	intergenic_region	MODIFIER	LinJ.01.0700-LinJ.01.0710	LinJ.01.0700-LinJ.01.0710	intergenic_region	LinJ.01.0700-LinJ.01.0710	n.203888A>G
LinJ.01	203896	.	T	G	.	.	ANN=G	intergenic_region	MODIFIER	LinJ.01.0700-LinJ.01.0710	LinJ.01.0700-LinJ.01.0710	intergenic_region	LinJ.01.0700-LinJ.01.0710	n.203896T>G
LinJ.01	211586	.	G	A	.	.	ANN=A	intergenic_region	MODIFIER	LinJ.01.0720-LinJ.01.0730	LinJ.01.0720-LinJ.01.0730	intergenic_region	LinJ.01.0720-LinJ.01.0730	n.211586G>A
LinJ.01	212232	.	A	G	.	.	ANN=G	intergenic_region	MODIFIER	LinJ.01.0720-LinJ.01.0730	LinJ.01.0720-LinJ.01.0730	intergenic_region	LinJ.01.0720-LinJ.01.0730	n.212232A>G
LinJ.01	213482	.	G	A	.	.	ANN=A	synonymous_variant	LOW	LinJ.01.0730	LinJ.01.0730	transcript	LinJ.01.0730:mRNA	protein_coding	2019-01-01	c.732G>A	p.Thr244Thr	732/1620	732/1620	244/539
LinJ.01	213930	.	G	A	.	.	ANN=A	missense_variant	MODERATE	LinJ.01.0730	LinJ.01.0730	transcript	LinJ.01.0730:mRNA	protein_coding	2019-01-01	c.1180G>A	p.Ala394Thr	1180/1620	1180/1620	394/539
LinJ.01	214082	.	C	T	.	.	ANN=T	synonymous_variant	LOW	LinJ.01.0730	LinJ.01.0730	transcript	LinJ.01.0730:mRNA	protein_coding	2019-01-01	c.1332C>T	p.Ile444Ile	1332/1620	1332/1620	444/539
LinJ.01	214204	.	A	G	.	.	ANN=G	missense_variant	MODERATE	LinJ.01.0730	LinJ.01.0730	transcript	LinJ.01.0730:mRNA	protein_coding	2019-01-01	c.1454A>G	p.Glu485Gly	1454/1620	1454/1620	485/539
LinJ.01	214267	.	C	A	.	.	ANN=A	missense_variant	MODERATE	LinJ.01.0730	LinJ.01.0730	transcript	LinJ.01.0730:mRNA	protein_coding	2019-01-01	c.1517C>A	p.Thr506Lys	1517/1620	1517/1620	506/539
LinJ.01	215638	.	C	T	.	.	ANN=T	intergenic_region	MODIFIER	LinJ.01.0730-LinJ.01.0740	LinJ.01.0730-LinJ.01.0740	intergenic_region	LinJ.01.0730-LinJ.01.0740	n.215638C>T
LinJ.01	216149	.	T	C	.	.	ANN=C	synonymous_variant	LOW	LinJ.01.0740	LinJ.01.0740	transcript	LinJ.01.0740:mRNA	protein_coding	2019-01-01	c.228T>C	p.Asp76Asp	228/3912	228/3912	76/1303
LinJ.01	217255	.	A	C	.	.	ANN=C	missense_variant	MODERATE	LinJ.01.0740	LinJ.01.0740	transcript	LinJ.01.0740:mRNA	protein_coding	2019-01-01	c.1334A>C	p.Gln445Pro	1334/3912	1334/3912	445/1303
LinJ.01	217271	.	T	C	.	.	ANN=C	synonymous_variant	LOW	LinJ.01.0740	LinJ.01.0740	transcript	LinJ.01.0740:mRNA	protein_coding	2019-01-01	c.1350T>C	p.Asp450Asp	1350/3912	1350/3912	450/1303
LinJ.01	219132	.	G	T	.	.	ANN=T	missense_variant	MODERATE	LinJ.01.0740	LinJ.01.0740	transcript	LinJ.01.0740:mRNA	protein_coding	2019-01-01	c.3211G>T	p.Ala1071Ser	3211/3912	3211/3912	1071/1303
LinJ.01	219166	.	C	A	.	.	ANN=A	missense_variant	MODERATE	LinJ.01.0740	LinJ.01.0740	transcript	LinJ.01.0740:mRNA	protein_coding	2019-01-01	c.3245C>A	p.Thr1082Lys	3245/3912	3245/3912	1082/1303
LinJ.01	221170	.	C	T	.	.	ANN=T	synonymous_variant	LOW	LinJ.01.0750	LinJ.01.0750	transcript	LinJ.01.0750:mRNA	protein_coding	2019-01-01	c.351C>T	p.His117His	351/7029	351/7029	117/2342
LinJ.01	221395	.	C	T	.	.	ANN=T	synonymous_variant	LOW	LinJ.01.0750	LinJ.01.0750	transcript	LinJ.01.0750:mRNA	protein_coding	2019-01-01	c.576C>T	p.Ala192Ala	576/7029	576/7029	192/2342
LinJ.01	230812	.	T	G	.	.	ANN=G	synonymous_variant	LOW	LinJ.01.0760	LinJ.01.0760	transcript	LinJ.01.0760:mRNA	protein_coding	2019-01-01	c.2181T>G	p.Gly727Gly	2181/2265	2181/2265	727/754
LinJ.01	230919	.	A	G	.	.	ANN=G	intergenic_region	MODIFIER	LinJ.01.0760-LinJ.01.0770	LinJ.01.0760-LinJ.01.0770	intergenic_region	LinJ.01.0760-LinJ.01.0770	n.230919A>G
LinJ.01	231260	.	A	G	.	.	ANN=G	intergenic_region	MODIFIER	LinJ.01.0760-LinJ.01.0770	LinJ.01.0760-LinJ.01.0770	intergenic_region	LinJ.01.0760-LinJ.01.0770	n.231260A>G
LinJ.01	231531	.	C	T	.	.	ANN=T	intergenic_region	MODIFIER	LinJ.01.0760-LinJ.01.0770	LinJ.01.0760-LinJ.01.0770	intergenic_region	LinJ.01.0760-LinJ.01.0770	n.231531C>T
LinJ.01	232282	.	T	C	.	.	ANN=C	intergenic_region	MODIFIER	LinJ.01.0760-LinJ.01.0770	LinJ.01.0760-LinJ.01.0770	intergenic_region	LinJ.01.0760-LinJ.01.0770	n.232282T>C
LinJ.01	232340	.	T	C	.	.	ANN=C	intergenic_region	MODIFIER	LinJ.01.0760-LinJ.01.0770	LinJ.01.0760-LinJ.01.0770	intergenic_region	LinJ.01.0760-LinJ.01.0770	n.232340T>C
LinJ.01	236344	.	C	T	.	.	ANN=T	missense_variant	MODERATE	LinJ.01.0770	LinJ.01.0770	transcript	LinJ.01.0770:mRNA	protein_coding	2019-01-01	c.3917C>T	p.Ser1306Phe	3917/4248	3917/4248	1306/1415
LinJ.01	236522	.	G	A	.	.	ANN=A	synonymous_variant	LOW	LinJ.01.0770	LinJ.01.0770	transcript	LinJ.01.0770:mRNA	protein_coding	2019-01-01	c.4095G>A	p.Gln1365Gln	4095/4248	4095/4248	1365/1415
LinJ.01	236833	.	A	G	.	.	ANN=G	intergenic_region	MODIFIER	LinJ.01.0770-LinJ.01.0780	LinJ.01.0770-LinJ.01.0780	intergenic_region	LinJ.01.0770-LinJ.01.0780	n.236833A>G
LinJ.01	244493	.	T	C	.	.	ANN=C	intergenic_region	MODIFIER	LinJ.01.0800-LinJ.01.0810	LinJ.01.0800-LinJ.01.0810	intergenic_region	LinJ.01.0800-LinJ.01.0810	n.244493T>C
LinJ.01	246010	.	C	T	.	.	ANN=T	synonymous_variant	LOW	LinJ.01.0810	LinJ.01.0810	transcript	LinJ.01.0810:mRNA	protein_coding	2019-01-01	c.240C>T	p.Arg80Arg	240/1593	240/1593	80/530
LinJ.01	246062	.	A	G	.	.	ANN=G	missense_variant	MODERATE	LinJ.01.0810	LinJ.01.0810	transcript	LinJ.01.0810:mRNA	protein_coding	2019-01-01	c.292A>G	p.Asn98Asp	292/1593	292/1593	98/530
LinJ.01	246711	.	G	A	.	.	ANN=A	missense_variant	MODERATE	LinJ.01.0810	LinJ.01.0810	transcript	LinJ.01.0810:mRNA	protein_coding	2019-01-01	c.941G>A	p.Arg314His	941/1593	941/1593	314/530
LinJ.01	247527	.	G	T	.	.	ANN=T	intergenic_region	MODIFIER	LinJ.01.0810-LinJ.01.0820	LinJ.01.0810-LinJ.01.0820	intergenic_region	LinJ.01.0810-LinJ.01.0820	n.247527G>T
LinJ.01	247785	.	A	G	.	.	ANN=G	intergenic_region	MODIFIER	LinJ.01.0810-LinJ.01.0820	LinJ.01.0810-LinJ.01.0820	intergenic_region	LinJ.01.0810-LinJ.01.0820	n.247785A>G
LinJ.01	249865	.	C	T	.	.	ANN=T	missense_variant	MODERATE	LinJ.01.0820	LinJ.01.0820	transcript	LinJ.01.0820:mRNA	protein_coding	2019-01-01	c.391C>T	p.Pro131Ser	391/1473	391/1473	131/490
LinJ.01	250281	.	A	G	.	.	ANN=G	synonymous_variant	LOW	LinJ.01.0820	LinJ.01.0820	transcript	LinJ.01.0820:mRNA	protein_coding	2019-01-01	c.807A>G	p.Gly269Gly	807/1473	807/1473	269/490
LinJ.01	251053	.	C	T	.	.	ANN=T	intergenic_region	MODIFIER	LinJ.01.0820-LinJ.01.0830	LinJ.01.0820-LinJ.01.0830	intergenic_region	LinJ.01.0820-LinJ.01.0830	n.251053C>T
LinJ.01	251926	.	A	G	.	.	ANN=G	intergenic_region	MODIFIER	LinJ.01.0820-LinJ.01.0830	LinJ.01.0820-LinJ.01.0830	intergenic_region	LinJ.01.0820-LinJ.01.0830	n.251926A>G
LinJ.01	252114	.	C	T	.	.	ANN=T	intergenic_region	MODIFIER	LinJ.01.0820-LinJ.01.0830	LinJ.01.0820-LinJ.01.0830	intergenic_region	LinJ.01.0820-LinJ.01.0830	n.252114C>T
LinJ.02	3298	.	A	G	.	.	ANN=G	intergenic_region	MODIFIER	LinJ.02.0010-LinJ.02.0020	LinJ.02.0010-LinJ.02.0020	intergenic_region	LinJ.02.0010-LinJ.02.0020	n.3298A>G
LinJ.02	3660	.	G	A	.	.	ANN=A	intergenic_region	MODIFIER	LinJ.02.0010-LinJ.02.0020	LinJ.02.0010-LinJ.02.0020	intergenic_region	LinJ.02.0010-LinJ.02.0020	n.3660G>A
LinJ.02	4163	.	A	G	.	.	ANN=G	intergenic_region	MODIFIER	LinJ.02.0010-LinJ.02.0020	LinJ.02.0010-LinJ.02.0020	intergenic_region	LinJ.02.0010-LinJ.02.0020	n.4163A>G
LinJ.02	4318	.	T	C	.	.	ANN=C	intergenic_region	MODIFIER	LinJ.02.0010-LinJ.02.0020	LinJ.02.0010-LinJ.02.0020	intergenic_region	LinJ.02.0010-LinJ.02.0020	n.4318T>C
LinJ.02	4773	.	G	A	.	.	ANN=A	intergenic_region	MODIFIER	LinJ.02.0010-LinJ.02.0020	LinJ.02.0010-LinJ.02.0020	intergenic_region	LinJ.02.0010-LinJ.02.0020	n.4773G>A
LinJ.02	4959	.	T	C	.	.	ANN=C	intergenic_region	MODIFIER	LinJ.02.0010-LinJ.02.0020	LinJ.02.0010-LinJ.02.0020	intergenic_region	LinJ.02.0010-LinJ.02.0020	n.4959T>C
LinJ.02	5083	.	C	G	.	.	ANN=G	intergenic_region	MODIFIER	LinJ.02.0010-LinJ.02.0020	LinJ.02.0010-LinJ.02.0020	intergenic_region	LinJ.02.0010-LinJ.02.0020	n.5083C>G
LinJ.02	5436	.	T	C	.	.	ANN=C	intergenic_region	MODIFIER	LinJ.02.0010-LinJ.02.0020	LinJ.02.0010-LinJ.02.0020	intergenic_region	LinJ.02.0010-LinJ.02.0020	n.5436T>C
LinJ.02	5532	.	C	G	.	.	ANN=G	intergenic_region	MODIFIER	LinJ.02.0010-LinJ.02.0020	LinJ.02.0010-LinJ.02.0020	intergenic_region	LinJ.02.0010-LinJ.02.0020	n.5532C>G
LinJ.02	5540	.	G	T	.	.	ANN=T	intergenic_region	MODIFIER	LinJ.02.0010-LinJ.02.0020	LinJ.02.0010-LinJ.02.0020	intergenic_region	LinJ.02.0010-LinJ.02.0020	n.5540G>T
LinJ.02	5658	.	A	G	.	.	ANN=G	intergenic_region	MODIFIER	LinJ.02.0010-LinJ.02.0020	LinJ.02.0010-LinJ.02.0020	intergenic_region	LinJ.02.0010-LinJ.02.0020	n.5658A>G
LinJ.02	5771	.	G	A	.	.	ANN=A	intergenic_region	MODIFIER	LinJ.02.0010-LinJ.02.0020	LinJ.02.0010-LinJ.02.0020	intergenic_region	LinJ.02.0010-LinJ.02.0020	n.5771G>A
LinJ.02	5941	.	G	C	.	.	ANN=C	intergenic_region	MODIFIER	LinJ.02.0010-LinJ.02.0020	LinJ.02.0010-LinJ.02.0020	intergenic_region	LinJ.02.0010-LinJ.02.0020	n.5941G>C
LinJ.02	6048	.	T	G	.	.	ANN=G	intergenic_region	MODIFIER	LinJ.02.0010-LinJ.02.0020	LinJ.02.0010-LinJ.02.0020	intergenic_region	LinJ.02.0010-LinJ.02.0020	n.6048T>G
LinJ.02	6200	.	A	G	.	.	ANN=G	intergenic_region	MODIFIER	LinJ.02.0010-LinJ.02.0020	LinJ.02.0010-LinJ.02.0020	intergenic_region	LinJ.02.0010-LinJ.02.0020	n.6200A>G
LinJ.02	6305	.	T	G	.	.	ANN=G	intergenic_region	MODIFIER	LinJ.02.0010-LinJ.02.0020	LinJ.02.0010-LinJ.02.0020	intergenic_region	LinJ.02.0010-LinJ.02.0020	n.6305T>G
LinJ.02	6406	.	G	A	.	.	ANN=A	intergenic_region	MODIFIER	LinJ.02.0010-LinJ.02.0020	LinJ.02.0010-LinJ.02.0020	intergenic_region	LinJ.02.0010-LinJ.02.0020	n.6406G>A
LinJ.02	7253	.	A	G	.	.	ANN=G	intergenic_region	MODIFIER	LinJ.02.0010-LinJ.02.0020	LinJ.02.0010-LinJ.02.0020	intergenic_region	LinJ.02.0010-LinJ.02.0020	n.7253A>G
LinJ.02	7286	.	G	A	.	.	ANN=A	intergenic_region	MODIFIER	LinJ.02.0010-LinJ.02.0020	LinJ.02.0010-LinJ.02.0020	intergenic_region	LinJ.02.0010-LinJ.02.0020	n.7286G>A
LinJ.02	8028	.	C	T	.	.	ANN=T	missense_variant	MODERATE	LinJ.02.0020	LinJ.02.0020	transcript	LinJ.02.0020:mRNA	protein_coding	2019-01-01	c.196G>A	p.Val66Met	196/657	196/657	66/218
LinJ.02	8217	.	T	C	.	.	ANN=C	missense_variant	MODERATE	LinJ.02.0020	LinJ.02.0020	transcript	LinJ.02.0020:mRNA	protein_coding	2019-01-01	c.7A>G	p.Thr3Ala	7/657	7/657	3/218
LinJ.02	8243	.	C	G	.	.	ANN=G	intergenic_region	MODIFIER	LinJ.02.0020-LinJ.02.0030	LinJ.02.0020-LinJ.02.0030	intergenic_region	LinJ.02.0020-LinJ.02.0030	n.8243C>G
LinJ.02	8533	.	C	G	.	.	ANN=G	intergenic_region	MODIFIER	LinJ.02.0020-LinJ.02.0030	LinJ.02.0020-LinJ.02.0030	intergenic_region	LinJ.02.0020-LinJ.02.0030	n.8533C>G
LinJ.02	8849	.	T	C	.	.	ANN=C	intergenic_region	MODIFIER	LinJ.02.0020-LinJ.02.0030	LinJ.02.0020-LinJ.02.0030	intergenic_region	LinJ.02.0020-LinJ.02.0030	n.8849T>C
LinJ.02	9242	.	G	C	.	.	ANN=C	synonymous_variant	LOW	LinJ.02.0030	LinJ.02.0030	transcript	LinJ.02.0030:mRNA	protein_coding	2019-01-01	c.207C>G	p.Pro69Pro	207/579	207/579	69/192
LinJ.02	9868	.	C	T	.	.	ANN=T	intergenic_region	MODIFIER	LinJ.02.0030-LinJ.02.0040	LinJ.02.0030-LinJ.02.0040	intergenic_region	LinJ.02.0030-LinJ.02.0040	n.9868C>T
LinJ.02	9996	.	A	T	.	.	ANN=T	intergenic_region	MODIFIER	LinJ.02.0030-LinJ.02.0040	LinJ.02.0030-LinJ.02.0040	intergenic_region	LinJ.02.0030-LinJ.02.0040	n.9996A>T
LinJ.02	11728	.	G	A	.	.	ANN=A	intergenic_region	MODIFIER	LinJ.02.0040-LinJ.02.0050	LinJ.02.0040-LinJ.02.0050	intergenic_region	LinJ.02.0040-LinJ.02.0050	n.11728G>A
LinJ.02	11784	.	G	C	.	.	ANN=C	intergenic_region	MODIFIER	LinJ.02.0040-LinJ.02.0050	LinJ.02.0040-LinJ.02.0050	intergenic_region	LinJ.02.0040-LinJ.02.0050	n.11784G>C
LinJ.02	11794	.	A	G	.	.	ANN=G	intergenic_region	MODIFIER	LinJ.02.0040-LinJ.02.0050	LinJ.02.0040-LinJ.02.0050	intergenic_region	LinJ.02.0040-LinJ.02.0050	n.11794A>G
LinJ.02	12457	.	C	T	.	.	ANN=T	intergenic_region	MODIFIER	LinJ.02.0040-LinJ.02.0050	LinJ.02.0040-LinJ.02.0050	intergenic_region	LinJ.02.0040-LinJ.02.0050	n.12457C>T
LinJ.02	12680	.	G	A	.	.	ANN=A	intergenic_region	MODIFIER	LinJ.02.0040-LinJ.02.0050	LinJ.02.0040-LinJ.02.0050	intergenic_region	LinJ.02.0040-LinJ.02.0050	n.12680G>A
LinJ.02	12697	.	A	G	.	.	ANN=G	intergenic_region	MODIFIER	LinJ.02.0040-LinJ.02.0050	LinJ.02.0040-LinJ.02.0050	intergenic_region	LinJ.02.0040-LinJ.02.0050	n.12697A>G
LinJ.02	12740	.	G	A	.	.	ANN=A	intergenic_region	MODIFIER	LinJ.02.0040-LinJ.02.0050	LinJ.02.0040-LinJ.02.0050	intergenic_region	LinJ.02.0040-LinJ.02.0050	n.12740G>A
LinJ.02	12756	.	T	C	.	.	ANN=C	intergenic_region	MODIFIER	LinJ.02.0040-LinJ.02.0050	LinJ.02.0040-LinJ.02.0050	intergenic_region	LinJ.02.0040-LinJ.02.0050	n.12756T>C
LinJ.02	12926	.	A	G	.	.	ANN=G	intergenic_region	MODIFIER	LinJ.02.0040-LinJ.02.0050	LinJ.02.0040-LinJ.02.0050	intergenic_region	LinJ.02.0040-LinJ.02.0050	n.12926A>G
LinJ.02	14895	.	A	G	.	.	ANN=G	synonymous_variant	LOW	LinJ.02.0050	LinJ.02.0050	transcript	LinJ.02.0050:mRNA	protein_coding	2019-01-01	c.1428T>C	p.Ala476Ala	1428/2982	1428/2982	476/993
LinJ.02	14934	.	G	A	.	.	ANN=A	synonymous_variant	LOW	LinJ.02.0050	LinJ.02.0050	transcript	LinJ.02.0050:mRNA	protein_coding	2019-01-01	c.1389C>T	p.His463His	1389/2982	1389/2982	463/993
LinJ.02	15241	.	C	G	.	.	ANN=G	missense_variant	MODERATE	LinJ.02.0050	LinJ.02.0050	transcript	LinJ.02.0050:mRNA	protein_coding	2019-01-01	c.1082G>C	p.Gly361Ala	1082/2982	1082/2982	361/993
LinJ.02	15321	.	A	G	.	.	ANN=G	synonymous_variant	LOW	LinJ.02.0050	LinJ.02.0050	transcript	LinJ.02.0050:mRNA	protein_coding	2019-01-01	c.1002T>C	p.Leu334Leu	1002/2982	1002/2982	334/993
LinJ.02	15555	.	A	G	.	.	ANN=G	synonymous_variant	LOW	LinJ.02.0050	LinJ.02.0050	transcript	LinJ.02.0050:mRNA	protein_coding	2019-01-01	c.768T>C	p.Arg256Arg	768/2982	768/2982	256/993
LinJ.02	15747	.	A	G	.	.	ANN=G	synonymous_variant	LOW	LinJ.02.0050	LinJ.02.0050	transcript	LinJ.02.0050:mRNA	protein_coding	2019-01-01	c.576T>C	p.Cys192Cys	576/2982	576/2982	192/993
LinJ.02	15957	.	C	T	.	.	ANN=T	synonymous_variant	LOW	LinJ.02.0050	LinJ.02.0050	transcript	LinJ.02.0050:mRNA	protein_coding	2019-01-01	c.366G>A	p.Ala122Ala	366/2982	366/2982	122/993
LinJ.02	16141	.	C	G	.	.	ANN=G	missense_variant	MODERATE	LinJ.02.0050	LinJ.02.0050	transcript	LinJ.02.0050:mRNA	protein_coding	2019-01-01	c.182G>C	p.Gly61Ala	182/2982	182/2982	61/993
LinJ.02	16155	.	A	G	.	.	ANN=G	synonymous_variant	LOW	LinJ.02.0050	LinJ.02.0050	transcript	LinJ.02.0050:mRNA	protein_coding	2019-01-01	c.168T>C	p.Phe56Phe	168/2982	168/2982	56/993
LinJ.02	16194	.	T	C	.	.	ANN=C	synonymous_variant	LOW	LinJ.02.0050	LinJ.02.0050	transcript	LinJ.02.0050:mRNA	protein_coding	2019-01-01	c.129A>G	p.Pro43Pro	129/2982	129/2982	43/993
LinJ.02	16269	.	C	G	.	.	ANN=G	synonymous_variant	LOW	LinJ.02.0050	LinJ.02.0050	transcript	LinJ.02.0050:mRNA	protein_coding	2019-01-01	c.54G>C	p.Leu18Leu	54/2982	54/2982	18/993
LinJ.02	16378	.	A	G	.	.	ANN=G	intergenic_region	MODIFIER	LinJ.02.0050-LinJ.02.0060	LinJ.02.0050-LinJ.02.0060	intergenic_region	LinJ.02.0050-LinJ.02.0060	n.16378A>G
LinJ.02	16440	.	C	T	.	.	ANN=T	intergenic_region	MODIFIER	LinJ.02.0050-LinJ.02.0060	LinJ.02.0050-LinJ.02.0060	intergenic_region	LinJ.02.0050-LinJ.02.0060	n.16440C>T
LinJ.02	16674	.	A	C	.	.	ANN=C	intergenic_region	MODIFIER	LinJ.02.0050-LinJ.02.0060	LinJ.02.0050-LinJ.02.0060	intergenic_region	LinJ.02.0050-LinJ.02.0060	n.16674A>C
LinJ.02	16770	.	A	G	.	.	ANN=G	intergenic_region	MODIFIER	LinJ.02.0050-LinJ.02.0060	LinJ.02.0050-LinJ.02.0060	intergenic_region	LinJ.02.0050-LinJ.02.0060	n.16770A>G
LinJ.02	16988	.	G	C	.	.	ANN=C	intergenic_region	MODIFIER	LinJ.02.0050-LinJ.02.0060	LinJ.02.0050-LinJ.02.0060	intergenic_region	LinJ.02.0050-LinJ.02.0060	n.16988G>C
LinJ.02	17022	.	C	T	.	.	ANN=T	intergenic_region	MODIFIER	LinJ.02.0050-LinJ.02.0060	LinJ.02.0050-LinJ.02.0060	intergenic_region	LinJ.02.0050-LinJ.02.0060	n.17022C>T
LinJ.02	17259	.	A	G	.	.	ANN=G	intergenic_region	MODIFIER	LinJ.02.0050-LinJ.02.0060	LinJ.02.0050-LinJ.02.0060	intergenic_region	LinJ.02.0050-LinJ.02.0060	n.17259A>G
LinJ.02	18220	.	G	C	.	.	ANN=C	missense_variant	MODERATE	LinJ.02.0060	LinJ.02.0060	transcript	LinJ.02.0060:mRNA	protein_coding	2019-01-01	c.641C>G	p.Thr214Arg	641/945	641/945	214/314
LinJ.02	19625	.	C	A	.	.	ANN=A	intergenic_region	MODIFIER	LinJ.02.0060-LinJ.02.0070	LinJ.02.0060-LinJ.02.0070	intergenic_region	LinJ.02.0060-LinJ.02.0070	n.19625C>A
LinJ.02	20218	.	A	G	.	.	ANN=G	synonymous_variant	LOW	LinJ.02.0070	LinJ.02.0070	transcript	LinJ.02.0070:mRNA	protein_coding	2019-01-01	c.1017T>C	p.Gly339Gly	1017/1065	1017/1065	339/354
LinJ.02	21308	.	T	C	.	.	ANN=C	intergenic_region	MODIFIER	LinJ.02.0070-LinJ.02.0080	LinJ.02.0070-LinJ.02.0080	intergenic_region	LinJ.02.0070-LinJ.02.0080	n.21308T>C
LinJ.02	21328	.	C	T	.	.	ANN=T	intergenic_region	MODIFIER	LinJ.02.0070-LinJ.02.0080	LinJ.02.0070-LinJ.02.0080	intergenic_region	LinJ.02.0070-LinJ.02.0080	n.21328C>T
LinJ.02	21380	.	A	G	.	.	ANN=G	intergenic_region	MODIFIER	LinJ.02.0070-LinJ.02.0080	LinJ.02.0070-LinJ.02.0080	intergenic_region	LinJ.02.0070-LinJ.02.0080	n.21380A>G
LinJ.02	21425	.	T	C	.	.	ANN=C	intergenic_region	MODIFIER	LinJ.02.0070-LinJ.02.0080	LinJ.02.0070-LinJ.02.0080	intergenic_region	LinJ.02.0070-LinJ.02.0080	n.21425T>C
LinJ.02	21859	.	A	G	.	.	ANN=G	intergenic_region	MODIFIER	LinJ.02.0070-LinJ.02.0080	LinJ.02.0070-LinJ.02.0080	intergenic_region	LinJ.02.0070-LinJ.02.0080	n.21859A>G
LinJ.02	21900	.	A	G	.	.	ANN=G	intergenic_region	MODIFIER	LinJ.02.0070-LinJ.02.0080	LinJ.02.0070-LinJ.02.0080	intergenic_region	LinJ.02.0070-LinJ.02.0080	n.21900A>G
LinJ.02	22710	.	C	A	.	.	ANN=A	intergenic_region	MODIFIER	LinJ.02.0070-LinJ.02.0080	LinJ.02.0070-LinJ.02.0080	intergenic_region	LinJ.02.0070-LinJ.02.0080	n.22710C>A
LinJ.02	22960	.	A	C	.	.	ANN=C	intergenic_region	MODIFIER	LinJ.02.0070-LinJ.02.0080	LinJ.02.0070-LinJ.02.0080	intergenic_region	LinJ.02.0070-LinJ.02.0080	n.22960A>C
LinJ.02	24920	.	A	G	.	.	ANN=G	missense_variant	MODERATE	LinJ.02.0080	LinJ.02.0080	transcript	LinJ.02.0080:mRNA	protein_coding	2019-01-01	c.1766T>C	p.Leu589Pro	1766/2757	1766/2757	589/918
LinJ.02	24967	.	C	G	.	.	ANN=G	synonymous_variant	LOW	LinJ.02.0080	LinJ.02.0080	transcript	LinJ.02.0080:mRNA	protein_coding	2019-01-01	c.1719G>C	p.Pro573Pro	1719/2757	1719/2757	573/918
LinJ.02	27596	.	C	A	.	.	ANN=A	intergenic_region	MODIFIER	LinJ.02.0080-LinJ.02.0090	LinJ.02.0080-LinJ.02.0090	intergenic_region	LinJ.02.0080-LinJ.02.0090	n.27596C>A
LinJ.02	27699	.	C	A	.	.	ANN=A	intergenic_region	MODIFIER	LinJ.02.0080-LinJ.02.0090	LinJ.02.0080-LinJ.02.0090	intergenic_region	LinJ.02.0080-LinJ.02.0090	n.27699C>A
LinJ.02	30057	.	G	C	.	.	ANN=C	synonymous_variant	LOW	LinJ.02.0090	LinJ.02.0090	transcript	LinJ.02.0090:mRNA	protein_coding	2019-01-01	c.2382C>G	p.Val794Val	2382/3501	2382/3501	794/1166
LinJ.02	30061	.	G	A	.	.	ANN=A	missense_variant	MODERATE	LinJ.02.0090	LinJ.02.0090	transcript	LinJ.02.0090:mRNA	protein_coding	2019-01-01	c.2378C>T	p.Ser793Phe	2378/3501	2378/3501	793/1166
LinJ.02	32384	.	C	G	.	.	ANN=G	missense_variant	MODERATE	LinJ.02.0090	LinJ.02.0090	transcript	LinJ.02.0090:mRNA	protein_coding	2019-01-01	c.55G>C	p.Ala19Pro	55/3501	55/3501	19/1166
LinJ.02	32454	.	G	T	.	.	ANN=T	intergenic_region	MODIFIER	LinJ.02.0090-LinJ.02.0100	LinJ.02.0090-LinJ.02.0100	intergenic_region	LinJ.02.0090-LinJ.02.0100	n.32454G>T
LinJ.02	32778	.	T	C	.	.	ANN=C	intergenic_region	MODIFIER	LinJ.02.0090-LinJ.02.0100	LinJ.02.0090-LinJ.02.0100	intergenic_region	LinJ.02.0090-LinJ.02.0100	n.32778T>C
LinJ.02	34205	.	G	C	.	.	ANN=C	intergenic_region	MODIFIER	LinJ.02.0090-LinJ.02.0100	LinJ.02.0090-LinJ.02.0100	intergenic_region	LinJ.02.0090-LinJ.02.0100	n.34205G>C
LinJ.02	37819	.	T	C	.	.	ANN=C	missense_variant	MODERATE	LinJ.02.0100	LinJ.02.0100	transcript	LinJ.02.0100:mRNA	protein_coding	2019-01-01	c.11158A>G	p.Thr3720Ala	11158/14721	11158/14721	3720/4906
LinJ.02	37962	.	T	A	.	.	ANN=A	missense_variant	MODERATE	LinJ.02.0100	LinJ.02.0100	transcript	LinJ.02.0100:mRNA	protein_coding	2019-01-01	c.11015A>T	p.Glu3672Val	11015/14721	11015/14721	3672/4906
LinJ.02	38219	.	A	G	.	.	ANN=G	synonymous_variant	LOW	LinJ.02.0100	LinJ.02.0100	transcript	LinJ.02.0100:mRNA	protein_coding	2019-01-01	c.10758T>C	p.Thr3586Thr	10758/14721	10758/14721	3586/4906
LinJ.02	46436	.	C	A	.	.	ANN=A	synonymous_variant	LOW	LinJ.02.0100	LinJ.02.0100	transcript	LinJ.02.0100:mRNA	protein_coding	2019-01-01	c.2541G>T	p.Leu847Leu	2541/14721	2541/14721	847/4906
LinJ.02	46707	.	A	T	.	.	ANN=T	missense_variant	MODERATE	LinJ.02.0100	LinJ.02.0100	transcript	LinJ.02.0100:mRNA	protein_coding	2019-01-01	c.2270T>A	p.Val757Asp	2270/14721	2270/14721	757/4906
LinJ.02	46872	.	A	C	.	.	ANN=C	missense_variant	MODERATE	LinJ.02.0100	LinJ.02.0100	transcript	LinJ.02.0100:mRNA	protein_coding	2019-01-01	c.2105T>G	p.Met702Arg	2105/14721	2105/14721	702/4906
LinJ.02	46967	.	T	C	.	.	ANN=C	missense_variant	MODERATE	LinJ.02.0100	LinJ.02.0100	transcript	LinJ.02.0100:mRNA	protein_coding	2019-01-01	c.2010A>G	p.Ile670Met	2010/14721	2010/14721	670/4906
LinJ.02	47916	.	G	T	.	.	ANN=T	missense_variant	MODERATE	LinJ.02.0100	LinJ.02.0100	transcript	LinJ.02.0100:mRNA	protein_coding	2019-01-01	c.1061C>A	p.Ala354Asp	1061/14721	1061/14721	354/4906
LinJ.02	50247	.	G	T	.	.	ANN=T	intergenic_region	MODIFIER	LinJ.02.0100-LinJ.02.0110	LinJ.02.0100-LinJ.02.0110	intergenic_region	LinJ.02.0100-LinJ.02.0110	n.50247G>T
LinJ.02	51750	.	T	G	.	.	ANN=G	intergenic_region	MODIFIER	LinJ.02.0110-LinJ.02.0120	LinJ.02.0110-LinJ.02.0120	intergenic_region	LinJ.02.0110-LinJ.02.0120	n.51750T>G
LinJ.02	52214	.	A	G	.	.	ANN=G	synonymous_variant	LOW	LinJ.02.0120	LinJ.02.0120	transcript	LinJ.02.0120:mRNA	protein_coding	2019-01-01	c.1767T>C	p.Cys589Cys	1767/1836	1767/1836	589/611
LinJ.02	54323	.	A	G	.	.	ANN=G	intergenic_region	MODIFIER	LinJ.02.0120-LinJ.02.0130	LinJ.02.0120-LinJ.02.0130	intergenic_region	LinJ.02.0120-LinJ.02.0130	n.54323A>G
LinJ.02	54973	.	T	C	.	.	ANN=C	intergenic_region	MODIFIER	LinJ.02.0120-LinJ.02.0130	LinJ.02.0120-LinJ.02.0130	intergenic_region	LinJ.02.0120-LinJ.02.0130	n.54973T>C
LinJ.02	55272	.	T	G	.	.	ANN=G	intergenic_region	MODIFIER	LinJ.02.0120-LinJ.02.0130	LinJ.02.0120-LinJ.02.0130	intergenic_region	LinJ.02.0120-LinJ.02.0130	n.55272T>G
LinJ.02	56141	.	C	T	.	.	ANN=T	synonymous_variant	LOW	LinJ.02.0130	LinJ.02.0130	transcript	LinJ.02.0130:mRNA	protein_coding	2019-01-01	c.5898G>A	p.Leu1966Leu	5898/5913	5898/5913	1966/1970
LinJ.02	60655	.	C	G	.	.	ANN=G	missense_variant	MODERATE	LinJ.02.0130	LinJ.02.0130	transcript	LinJ.02.0130:mRNA	protein_coding	2019-01-01	c.1384G>C	p.Gly462Arg	1384/5913	1384/5913	462/1970
LinJ.02	61164	.	T	C	.	.	ANN=C	missense_variant	MODERATE	LinJ.02.0130	LinJ.02.0130	transcript	LinJ.02.0130:mRNA	protein_coding	2019-01-01	c.875A>G	p.His292Arg	875/5913	875/5913	292/1970
LinJ.02	61277	.	A	G	.	.	ANN=G	synonymous_variant	LOW	LinJ.02.0130	LinJ.02.0130	transcript	LinJ.02.0130:mRNA	protein_coding	2019-01-01	c.762T>C	p.Ala254Ala	762/5913	762/5913	254/1970
LinJ.02	62018	.	C	T	.	.	ANN=T	synonymous_variant	LOW	LinJ.02.0130	LinJ.02.0130	transcript	LinJ.02.0130:mRNA	protein_coding	2019-01-01	c.21G>A	p.Ala7Ala	21/5913	21/5913	1970-07-01
LinJ.02	62672	.	G	A	.	.	ANN=A	intergenic_region	MODIFIER	LinJ.02.0130-LinJ.02.0140	LinJ.02.0130-LinJ.02.0140	intergenic_region	LinJ.02.0130-LinJ.02.0140	n.62672G>A
LinJ.02	63068	.	A	T	.	.	ANN=T	intergenic_region	MODIFIER	LinJ.02.0130-LinJ.02.0140	LinJ.02.0130-LinJ.02.0140	intergenic_region	LinJ.02.0130-LinJ.02.0140	n.63068A>T
LinJ.02	64914	.	C	A	.	.	ANN=A	intergenic_region	MODIFIER	LinJ.02.0130-LinJ.02.0140	LinJ.02.0130-LinJ.02.0140	intergenic_region	LinJ.02.0130-LinJ.02.0140	n.64914C>A
LinJ.02	64949	.	A	G	.	.	ANN=G	intergenic_region	MODIFIER	LinJ.02.0130-LinJ.02.0140	LinJ.02.0130-LinJ.02.0140	intergenic_region	LinJ.02.0130-LinJ.02.0140	n.64949A>G
LinJ.02	64977	.	T	C	.	.	ANN=C	intergenic_region	MODIFIER	LinJ.02.0130-LinJ.02.0140	LinJ.02.0130-LinJ.02.0140	intergenic_region	LinJ.02.0130-LinJ.02.0140	n.64977T>C
LinJ.02	65024	.	A	C	.	.	ANN=C	intergenic_region	MODIFIER	LinJ.02.0130-LinJ.02.0140	LinJ.02.0130-LinJ.02.0140	intergenic_region	LinJ.02.0130-LinJ.02.0140	n.65024A>C
LinJ.02	65098	.	A	G	.	.	ANN=G	intergenic_region	MODIFIER	LinJ.02.0130-LinJ.02.0140	LinJ.02.0130-LinJ.02.0140	intergenic_region	LinJ.02.0130-LinJ.02.0140	n.65098A>G
LinJ.02	65345	.	G	C	.	.	ANN=C	intergenic_region	MODIFIER	LinJ.02.0130-LinJ.02.0140	LinJ.02.0130-LinJ.02.0140	intergenic_region	LinJ.02.0130-LinJ.02.0140	n.65345G>C
LinJ.02	65355	.	C	G	.	.	ANN=G	intergenic_region	MODIFIER	LinJ.02.0130-LinJ.02.0140	LinJ.02.0130-LinJ.02.0140	intergenic_region	LinJ.02.0130-LinJ.02.0140	n.65355C>G
LinJ.02	65634	.	A	C	.	.	ANN=C	intergenic_region	MODIFIER	LinJ.02.0130-LinJ.02.0140	LinJ.02.0130-LinJ.02.0140	intergenic_region	LinJ.02.0130-LinJ.02.0140	n.65634A>C
LinJ.02	85793	.	A	G	.	.	ANN=G	intergenic_region	MODIFIER	LinJ.02.0160-LinJ.02.0170	LinJ.02.0160-LinJ.02.0170	intergenic_region	LinJ.02.0160-LinJ.02.0170	n.85793A>G
LinJ.02	117153	.	G	T	.	.	ANN=T	intergenic_region	MODIFIER	LinJ.02.0220-LinJ.02.0230	LinJ.02.0220-LinJ.02.0230	intergenic_region	LinJ.02.0220-LinJ.02.0230	n.117153G>T
LinJ.02	117174	.	A	C	.	.	ANN=C	intergenic_region	MODIFIER	LinJ.02.0220-LinJ.02.0230	LinJ.02.0220-LinJ.02.0230	intergenic_region	LinJ.02.0220-LinJ.02.0230	n.117174A>C
LinJ.02	119273	.	C	T	.	.	ANN=T	intergenic_region	MODIFIER	LinJ.02.0230-LinJ.02.0240	LinJ.02.0230-LinJ.02.0240	intergenic_region	LinJ.02.0230-LinJ.02.0240	n.119273C>T
LinJ.02	188282	.	G	C	.	.	ANN=C	intergenic_region	MODIFIER	LinJ.02.0400-LinJ.02.0410	LinJ.02.0400-LinJ.02.0410	intergenic_region	LinJ.02.0400-LinJ.02.0410	n.188282G>C
LinJ.02	188534	.	G	C	.	.	ANN=C	missense_variant	MODERATE	LinJ.02.0410	LinJ.02.0410	transcript	LinJ.02.0410:mRNA	protein_coding	2019-01-01	c.1238C>G	p.Ala413Gly	1238/1242	1238/1242	413/413
LinJ.02	191095	.	C	T	.	.	ANN=T	intergenic_region	MODIFIER	LinJ.02.0410-LinJ.02.0420	LinJ.02.0410-LinJ.02.0420	intergenic_region	LinJ.02.0410-LinJ.02.0420	n.191095C>T
LinJ.02	206010	.	T	C	.	.	ANN=C	missense_variant	MODERATE	LinJ.02.0440	LinJ.02.0440	transcript	LinJ.02.0440:mRNA	protein_coding	2019-01-01	c.4012A>G	p.Thr1338Ala	4012/10752	4012/10752	1338/3583
LinJ.02	227770	.	A	G	.	.	ANN=G	synonymous_variant	LOW	LinJ.02.0490	LinJ.02.0490	transcript	LinJ.02.0490:mRNA	protein_coding	2019-01-01	c.2049T>C	p.Leu683Leu	2049/6276	2049/6276	683/2091
LinJ.02	232573	.	G	T	.	.	ANN=T	intergenic_region	MODIFIER	LinJ.02.0490-LinJ.02.0500	LinJ.02.0490-LinJ.02.0500	intergenic_region	LinJ.02.0490-LinJ.02.0500	n.232573G>T
LinJ.02	232654	.	G	C	.	.	ANN=C	intergenic_region	MODIFIER	LinJ.02.0490-LinJ.02.0500	LinJ.02.0490-LinJ.02.0500	intergenic_region	LinJ.02.0490-LinJ.02.0500	n.232654G>C
LinJ.02	236819	.	A	G	.	.	ANN=G	missense_variant	MODERATE	LinJ.02.0500	LinJ.02.0500	transcript	LinJ.02.0500:mRNA	protein_coding	2019-01-01	c.1909T>C	p.Phe637Leu	1909/2592	1909/2592	637/863
LinJ.02	248181	.	A	G	.	.	ANN=G	intergenic_region	MODIFIER	LinJ.02.0530-LinJ.02.0540	LinJ.02.0530-LinJ.02.0540	intergenic_region	LinJ.02.0530-LinJ.02.0540	n.248181A>G
LinJ.02	248405	.	C	T	.	.	ANN=T	intergenic_region	MODIFIER	LinJ.02.0530-LinJ.02.0540	LinJ.02.0530-LinJ.02.0540	intergenic_region	LinJ.02.0530-LinJ.02.0540	n.248405C>T
LinJ.02	248974	.	G	A	.	.	ANN=A	intergenic_region	MODIFIER	LinJ.02.0530-LinJ.02.0540	LinJ.02.0530-LinJ.02.0540	intergenic_region	LinJ.02.0530-LinJ.02.0540	n.248974G>A
LinJ.02	249953	.	A	G	.	.	ANN=G	intergenic_region	MODIFIER	LinJ.02.0530-LinJ.02.0540	LinJ.02.0530-LinJ.02.0540	intergenic_region	LinJ.02.0530-LinJ.02.0540	n.249953A>G
LinJ.02	251008	.	A	G	.	.	ANN=G	intergenic_region	MODIFIER	LinJ.02.0530-LinJ.02.0540	LinJ.02.0530-LinJ.02.0540	intergenic_region	LinJ.02.0530-LinJ.02.0540	n.251008A>G
LinJ.02	255388	.	T	C	.	.	ANN=C	intergenic_region	MODIFIER	LinJ.02.0540-LinJ.02.0550	LinJ.02.0540-LinJ.02.0550	intergenic_region	LinJ.02.0540-LinJ.02.0550	n.255388T>C
LinJ.02	255980	.	A	G	.	.	ANN=G	intergenic_region	MODIFIER	LinJ.02.0540-LinJ.02.0550	LinJ.02.0540-LinJ.02.0550	intergenic_region	LinJ.02.0540-LinJ.02.0550	n.255980A>G
LinJ.02	258046	.	T	C	.	.	ANN=C	intergenic_region	MODIFIER	LinJ.02.0540-LinJ.02.0550	LinJ.02.0540-LinJ.02.0550	intergenic_region	LinJ.02.0540-LinJ.02.0550	n.258046T>C
LinJ.02	259441	.	T	C	.	.	ANN=C	intergenic_region	MODIFIER	LinJ.02.0540-LinJ.02.0550	LinJ.02.0540-LinJ.02.0550	intergenic_region	LinJ.02.0540-LinJ.02.0550	n.259441T>C
LinJ.02	260219	.	C	T	.	.	ANN=T	intergenic_region	MODIFIER	LinJ.02.0540-LinJ.02.0550	LinJ.02.0540-LinJ.02.0550	intergenic_region	LinJ.02.0540-LinJ.02.0550	n.260219C>T
LinJ.02	260393	.	G	A	.	.	ANN=A	intergenic_region	MODIFIER	LinJ.02.0540-LinJ.02.0550	LinJ.02.0540-LinJ.02.0550	intergenic_region	LinJ.02.0540-LinJ.02.0550	n.260393G>A
LinJ.02	260409	.	C	T	.	.	ANN=T	intergenic_region	MODIFIER	LinJ.02.0540-LinJ.02.0550	LinJ.02.0540-LinJ.02.0550	intergenic_region	LinJ.02.0540-LinJ.02.0550	n.260409C>T
LinJ.02	260983	.	G	A,C	.	.	ANN=A	intergenic_region	MODIFIER	LinJ.02.0540-LinJ.02.0550	LinJ.02.0540-LinJ.02.0550	intergenic_region	LinJ.02.0540-LinJ.02.0550	n.260983G>A	,C	intergenic_region	MODIFIER	LinJ.02.0540-LinJ.02.0550	LinJ.02.0540-LinJ.02.0550	intergenic_region	LinJ.02.0540-LinJ.02.0550	n.260983G>C
LinJ.02	261613	.	G	T	.	.	ANN=T	intergenic_region	MODIFIER	LinJ.02.0540-LinJ.02.0550	LinJ.02.0540-LinJ.02.0550	intergenic_region	LinJ.02.0540-LinJ.02.0550	n.261613G>T
LinJ.02	261721	.	C	T	.	.	ANN=T	intergenic_region	MODIFIER	LinJ.02.0540-LinJ.02.0550	LinJ.02.0540-LinJ.02.0550	intergenic_region	LinJ.02.0540-LinJ.02.0550	n.261721C>T
LinJ.02	268698	.	G	A	.	.	ANN=A	missense_variant	MODERATE	LinJ.02.0550	LinJ.02.0550	transcript	LinJ.02.0550:mRNA	protein_coding	2019-01-01	c.1213G>A	p.Val405Ile	1213/11367	1213/11367	405/3788
LinJ.02	296687	.	T	G	.	.	ANN=G	missense_variant	MODERATE	LinJ.02.0610	LinJ.02.0610	transcript	LinJ.02.0610:mRNA	protein_coding	2019-01-01	c.3868T>G	p.Leu1290Val	3868/4245	3868/4245	1290/1414
LinJ.02	296793	.	A	G	.	.	ANN=G	missense_variant	MODERATE	LinJ.02.0610	LinJ.02.0610	transcript	LinJ.02.0610:mRNA	protein_coding	2019-01-01	c.3974A>G	p.Glu1325Gly	3974/4245	3974/4245	1325/1414
LinJ.02	300648	.	T	C	.	.	ANN=C	synonymous_variant	LOW	LinJ.02.0630	LinJ.02.0630	transcript	LinJ.02.0630:mRNA	protein_coding	2019-01-01	c.1201T>C	p.Leu401Leu	1201/2733	1201/2733	401/910
LinJ.02	302271	.	G	A	.	.	ANN=A	intergenic_region	MODIFIER	LinJ.02.0630-LinJ.02.0640	LinJ.02.0630-LinJ.02.0640	intergenic_region	LinJ.02.0630-LinJ.02.0640	n.302271G>A
LinJ.02	302587	.	T	C	.	.	ANN=C	intergenic_region	MODIFIER	LinJ.02.0630-LinJ.02.0640	LinJ.02.0630-LinJ.02.0640	intergenic_region	LinJ.02.0630-LinJ.02.0640	n.302587T>C
LinJ.02	303024	.	T	G	.	.	ANN=G	intergenic_region	MODIFIER	LinJ.02.0630-LinJ.02.0640	LinJ.02.0630-LinJ.02.0640	intergenic_region	LinJ.02.0630-LinJ.02.0640	n.303024T>G
LinJ.02	303862	.	T	C	.	.	ANN=C	synonymous_variant	LOW	LinJ.02.0640	LinJ.02.0640	transcript	LinJ.02.0640:mRNA	protein_coding	2019-01-01	c.786T>C	p.Gly262Gly	786/942	786/942	262/313
LinJ.02	304730	.	G	A	.	.	ANN=A	intergenic_region	MODIFIER	LinJ.02.0640-LinJ.02.0650	LinJ.02.0640-LinJ.02.0650	intergenic_region	LinJ.02.0640-LinJ.02.0650	n.304730G>A
LinJ.02	305016	.	A	T,G	.	.	ANN=T	intergenic_region	MODIFIER	LinJ.02.0640-LinJ.02.0650	LinJ.02.0640-LinJ.02.0650	intergenic_region	LinJ.02.0640-LinJ.02.0650	n.305016A>T	,G	intergenic_region	MODIFIER	LinJ.02.0640-LinJ.02.0650	LinJ.02.0640-LinJ.02.0650	intergenic_region	LinJ.02.0640-LinJ.02.0650	n.305016A>G
LinJ.02	305404	.	A	G	.	.	ANN=G	intergenic_region	MODIFIER	LinJ.02.0640-LinJ.02.0650	LinJ.02.0640-LinJ.02.0650	intergenic_region	LinJ.02.0640-LinJ.02.0650	n.305404A>G
LinJ.03	4009	.	A	G	.	.	ANN=G	synonymous_variant	LOW	LinJ.03.0010	LinJ.03.0010	transcript	LinJ.03.0010:mRNA	protein_coding	2019-01-01	c.2706T>C	p.Ile902Ile	2706/3030	2706/3030	902/1009
LinJ.03	6246	.	T	C	.	.	ANN=C	missense_variant	MODERATE	LinJ.03.0010	LinJ.03.0010	transcript	LinJ.03.0010:mRNA	protein_coding	2019-01-01	c.469A>G	p.Asn157Asp	469/3030	469/3030	157/1009
LinJ.03	7042	.	G	C	.	.	ANN=C	intergenic_region	MODIFIER	LinJ.03.0010-LinJ.03.0020	LinJ.03.0010-LinJ.03.0020	intergenic_region	LinJ.03.0010-LinJ.03.0020	n.7042G>C
LinJ.03	9450	.	T	G	.	.	ANN=G	intergenic_region	MODIFIER	LinJ.03.0020-LinJ.03.0030	LinJ.03.0020-LinJ.03.0030	intergenic_region	LinJ.03.0020-LinJ.03.0030	n.9450T>G
LinJ.03	9905	.	T	C	.	.	ANN=C	missense_variant	MODERATE	LinJ.03.0030	LinJ.03.0030	transcript	LinJ.03.0030:mRNA	protein_coding	2019-01-01	c.374T>C	p.Met125Thr	374/1224	374/1224	125/407
LinJ.03	10950	.	C	T	.	.	ANN=T	intergenic_region	MODIFIER	LinJ.03.0030-LinJ.03.0040	LinJ.03.0030-LinJ.03.0040	intergenic_region	LinJ.03.0030-LinJ.03.0040	n.10950C>T
LinJ.03	11119	.	G	T	.	.	ANN=T	intergenic_region	MODIFIER	LinJ.03.0030-LinJ.03.0040	LinJ.03.0030-LinJ.03.0040	intergenic_region	LinJ.03.0030-LinJ.03.0040	n.11119G>T
LinJ.03	11405	.	C	T	.	.	ANN=T	intergenic_region	MODIFIER	LinJ.03.0030-LinJ.03.0040	LinJ.03.0030-LinJ.03.0040	intergenic_region	LinJ.03.0030-LinJ.03.0040	n.11405C>T
LinJ.03	11861	.	G	A	.	.	ANN=A	synonymous_variant	LOW	LinJ.03.0040	LinJ.03.0040	transcript	LinJ.03.0040:mRNA	protein_coding	2019-01-01	c.168G>A	p.Gln56Gln	168/1146	168/1146	56/381
LinJ.03	14281	.	G	C	.	.	ANN=C	intergenic_region	MODIFIER	LinJ.03.0040-LinJ.03.0050	LinJ.03.0040-LinJ.03.0050	intergenic_region	LinJ.03.0040-LinJ.03.0050	n.14281G>C
LinJ.03	21118	.	G	C	.	.	ANN=C	synonymous_variant	LOW	LinJ.03.0070	LinJ.03.0070	transcript	LinJ.03.0070:mRNA	protein_coding	2019-01-01	c.45G>C	p.Thr15Thr	45/1887	45/1887	15/628
LinJ.03	22962	.	A	G	.	.	ANN=G	intergenic_region	MODIFIER	LinJ.03.0070-LinJ.03.0080	LinJ.03.0070-LinJ.03.0080	intergenic_region	LinJ.03.0070-LinJ.03.0080	n.22962A>G
LinJ.03	23063	.	A	G	.	.	ANN=G	intergenic_region	MODIFIER	LinJ.03.0070-LinJ.03.0080	LinJ.03.0070-LinJ.03.0080	intergenic_region	LinJ.03.0070-LinJ.03.0080	n.23063A>G
LinJ.03	23098	.	T	G	.	.	ANN=G	intergenic_region	MODIFIER	LinJ.03.0070-LinJ.03.0080	LinJ.03.0070-LinJ.03.0080	intergenic_region	LinJ.03.0070-LinJ.03.0080	n.23098T>G
LinJ.03	23408	.	A	G	.	.	ANN=G	intergenic_region	MODIFIER	LinJ.03.0070-LinJ.03.0080	LinJ.03.0070-LinJ.03.0080	intergenic_region	LinJ.03.0070-LinJ.03.0080	n.23408A>G
LinJ.03	23718	.	A	G	.	.	ANN=G	intergenic_region	MODIFIER	LinJ.03.0070-LinJ.03.0080	LinJ.03.0070-LinJ.03.0080	intergenic_region	LinJ.03.0070-LinJ.03.0080	n.23718A>G
LinJ.03	23781	.	C	A	.	.	ANN=A	intergenic_region	MODIFIER	LinJ.03.0070-LinJ.03.0080	LinJ.03.0070-LinJ.03.0080	intergenic_region	LinJ.03.0070-LinJ.03.0080	n.23781C>A
LinJ.03	23936	.	C	T	.	.	ANN=T	intergenic_region	MODIFIER	LinJ.03.0070-LinJ.03.0080	LinJ.03.0070-LinJ.03.0080	intergenic_region	LinJ.03.0070-LinJ.03.0080	n.23936C>T
LinJ.03	24628	.	C	T	.	.	ANN=T	synonymous_variant	LOW	LinJ.03.0080	LinJ.03.0080	transcript	LinJ.03.0080:mRNA	protein_coding	2019-01-01	c.414C>T	p.Ile138Ile	414/1704	414/1704	138/567
LinJ.03	24742	.	A	C	.	.	ANN=C	synonymous_variant	LOW	LinJ.03.0080	LinJ.03.0080	transcript	LinJ.03.0080:mRNA	protein_coding	2019-01-01	c.528A>C	p.Ala176Ala	528/1704	528/1704	176/567
LinJ.03	24773	.	G	T	.	.	ANN=T	missense_variant	MODERATE	LinJ.03.0080	LinJ.03.0080	transcript	LinJ.03.0080:mRNA	protein_coding	2019-01-01	c.559G>T	p.Val187Phe	559/1704	559/1704	187/567
LinJ.03	27383	.	T	C	.	.	ANN=C	synonymous_variant	LOW	LinJ.03.0090	LinJ.03.0090	transcript	LinJ.03.0090:mRNA	protein_coding	2019-01-01	c.6T>C	p.Tyr2Tyr	6/495	6/495	2/164
LinJ.03	28191	.	T	C	.	.	ANN=C	intergenic_region	MODIFIER	LinJ.03.0090-LinJ.03.0100	LinJ.03.0090-LinJ.03.0100	intergenic_region	LinJ.03.0090-LinJ.03.0100	n.28191T>C
LinJ.03	31522	.	T	C	.	.	ANN=C	missense_variant	MODERATE	LinJ.03.0100	LinJ.03.0100	transcript	LinJ.03.0100:mRNA	protein_coding	2019-01-01	c.2348T>C	p.Val783Ala	2348/2676	2348/2676	783/891
LinJ.03	31594	.	T	C	.	.	ANN=C	missense_variant	MODERATE	LinJ.03.0100	LinJ.03.0100	transcript	LinJ.03.0100:mRNA	protein_coding	2019-01-01	c.2420T>C	p.Val807Ala	2420/2676	2420/2676	807/891
LinJ.03	35198	.	T	C	.	.	ANN=C	synonymous_variant	LOW	LinJ.03.0110	LinJ.03.0110	transcript	LinJ.03.0110:mRNA	protein_coding	2019-01-01	c.2601T>C	p.Asp867Asp	2601/2778	2601/2778	867/925
LinJ.03	36401	.	T	C	.	.	ANN=C	synonymous_variant	LOW	LinJ.03.0120	LinJ.03.0120	transcript	LinJ.03.0120:mRNA	protein_coding	2019-01-01	c.81T>C	p.Cys27Cys	81/549	81/549	27/182
LinJ.03	37354	.	A	G	.	.	ANN=G	intergenic_region	MODIFIER	LinJ.03.0120-LinJ.03.0130	LinJ.03.0120-LinJ.03.0130	intergenic_region	LinJ.03.0120-LinJ.03.0130	n.37354A>G
LinJ.03	37395	.	T	C	.	.	ANN=C	intergenic_region	MODIFIER	LinJ.03.0120-LinJ.03.0130	LinJ.03.0120-LinJ.03.0130	intergenic_region	LinJ.03.0120-LinJ.03.0130	n.37395T>C
LinJ.03	39122	.	T	C	.	.	ANN=C	intergenic_region	MODIFIER	LinJ.03.0130-LinJ.03.0140	LinJ.03.0130-LinJ.03.0140	intergenic_region	LinJ.03.0130-LinJ.03.0140	n.39122T>C
LinJ.03	40630	.	A	G	.	.	ANN=G	intergenic_region	MODIFIER	LinJ.03.0140-LinJ.03.0150	LinJ.03.0140-LinJ.03.0150	intergenic_region	LinJ.03.0140-LinJ.03.0150	n.40630A>G
LinJ.03	43453	.	G	A	.	.	ANN=A	intergenic_region	MODIFIER	LinJ.03.0150-LinJ.03.0160	LinJ.03.0150-LinJ.03.0160	intergenic_region	LinJ.03.0150-LinJ.03.0160	n.43453G>A
LinJ.03	44040	.	G	A	.	.	ANN=A	intergenic_region	MODIFIER	LinJ.03.0150-LinJ.03.0160	LinJ.03.0150-LinJ.03.0160	intergenic_region	LinJ.03.0150-LinJ.03.0160	n.44040G>A
LinJ.03	44246	.	C	T	.	.	ANN=T	intergenic_region	MODIFIER	LinJ.03.0150-LinJ.03.0160	LinJ.03.0150-LinJ.03.0160	intergenic_region	LinJ.03.0150-LinJ.03.0160	n.44246C>T
LinJ.03	44632	.	T	G	.	.	ANN=G	missense_variant	MODERATE	LinJ.03.0160	LinJ.03.0160	transcript	LinJ.03.0160:mRNA	protein_coding	2019-01-01	c.262T>G	p.Ser88Ala	262/576	262/576	88/191
LinJ.03	45735	.	G	A	.	.	ANN=A	missense_variant	MODERATE	LinJ.03.0170	LinJ.03.0170	transcript	LinJ.03.0170:mRNA	protein_coding	2019-01-01	c.500G>A	p.Arg167Lys	500/2184	500/2184	167/727
LinJ.03	48186	.	A	G	.	.	ANN=G	intergenic_region	MODIFIER	LinJ.03.0170-LinJ.03.0180	LinJ.03.0170-LinJ.03.0180	intergenic_region	LinJ.03.0170-LinJ.03.0180	n.48186A>G
LinJ.03	48572	.	A	C	.	.	ANN=C	synonymous_variant	LOW	LinJ.03.0180	LinJ.03.0180	transcript	LinJ.03.0180:mRNA	protein_coding	2019-01-01	c.252A>C	p.Gly84Gly	252/633	252/633	84/210
LinJ.03	49058	.	T	G	.	.	ANN=G	intergenic_region	MODIFIER	LinJ.03.0180-LinJ.03.0190	LinJ.03.0180-LinJ.03.0190	intergenic_region	LinJ.03.0180-LinJ.03.0190	n.49058T>G
LinJ.03	49364	.	A	G	.	.	ANN=G	intergenic_region	MODIFIER	LinJ.03.0180-LinJ.03.0190	LinJ.03.0180-LinJ.03.0190	intergenic_region	LinJ.03.0180-LinJ.03.0190	n.49364A>G
LinJ.03	49450	.	A	T	.	.	ANN=T	intergenic_region	MODIFIER	LinJ.03.0180-LinJ.03.0190	LinJ.03.0180-LinJ.03.0190	intergenic_region	LinJ.03.0180-LinJ.03.0190	n.49450A>T
LinJ.03	49479	.	C	G	.	.	ANN=G	intergenic_region	MODIFIER	LinJ.03.0180-LinJ.03.0190	LinJ.03.0180-LinJ.03.0190	intergenic_region	LinJ.03.0180-LinJ.03.0190	n.49479C>G
LinJ.03	49533	.	T	G	.	.	ANN=G	intergenic_region	MODIFIER	LinJ.03.0180-LinJ.03.0190	LinJ.03.0180-LinJ.03.0190	intergenic_region	LinJ.03.0180-LinJ.03.0190	n.49533T>G
LinJ.03	49709	.	A	G	.	.	ANN=G	intergenic_region	MODIFIER	LinJ.03.0180-LinJ.03.0190	LinJ.03.0180-LinJ.03.0190	intergenic_region	LinJ.03.0180-LinJ.03.0190	n.49709A>G
LinJ.03	50066	.	T	A	.	.	ANN=A	intergenic_region	MODIFIER	LinJ.03.0180-LinJ.03.0190	LinJ.03.0180-LinJ.03.0190	intergenic_region	LinJ.03.0180-LinJ.03.0190	n.50066T>A
LinJ.03	50100	.	G	T	.	.	ANN=T	intergenic_region	MODIFIER	LinJ.03.0180-LinJ.03.0190	LinJ.03.0180-LinJ.03.0190	intergenic_region	LinJ.03.0180-LinJ.03.0190	n.50100G>T
LinJ.03	50434	.	T	C	.	.	ANN=C	intergenic_region	MODIFIER	LinJ.03.0180-LinJ.03.0190	LinJ.03.0180-LinJ.03.0190	intergenic_region	LinJ.03.0180-LinJ.03.0190	n.50434T>C
LinJ.03	102586	.	T	C	.	.	ANN=C	missense_variant	MODERATE	LinJ.03.0330	LinJ.03.0330	transcript	LinJ.03.0330:mRNA	protein_coding	2019-01-01	c.1091T>C	p.Leu364Ser	1091/4365	1091/4365	364/1454
LinJ.03	107646	.	A	C	.	.	ANN=C	intergenic_region	MODIFIER	LinJ.03.0330-LinJ.03.0340	LinJ.03.0330-LinJ.03.0340	intergenic_region	LinJ.03.0330-LinJ.03.0340	n.107646A>C
LinJ.03	107728	.	A	G	.	.	ANN=G	intergenic_region	MODIFIER	LinJ.03.0330-LinJ.03.0340	LinJ.03.0330-LinJ.03.0340	intergenic_region	LinJ.03.0330-LinJ.03.0340	n.107728A>G
LinJ.03	108313	.	G	A	.	.	ANN=A	intergenic_region	MODIFIER	LinJ.03.0330-LinJ.03.0340	LinJ.03.0330-LinJ.03.0340	intergenic_region	LinJ.03.0330-LinJ.03.0340	n.108313G>A
LinJ.03	108867	.	A	G	.	.	ANN=G	intergenic_region	MODIFIER	LinJ.03.0330-LinJ.03.0340	LinJ.03.0330-LinJ.03.0340	intergenic_region	LinJ.03.0330-LinJ.03.0340	n.108867A>G
LinJ.03	114150	.	G	C	.	.	ANN=C	synonymous_variant	LOW	LinJ.03.0340	LinJ.03.0340	transcript	LinJ.03.0340:mRNA	protein_coding	2019-01-01	c.4137G>C	p.Gly1379Gly	4137/4956	4137/4956	1379/1651
LinJ.03	116884	.	T	C	.	.	ANN=C	intergenic_region	MODIFIER	LinJ.03.0340-LinJ.03.0350	LinJ.03.0340-LinJ.03.0350	intergenic_region	LinJ.03.0340-LinJ.03.0350	n.116884T>C
LinJ.03	117040	.	A	C	.	.	ANN=C	intergenic_region	MODIFIER	LinJ.03.0340-LinJ.03.0350	LinJ.03.0340-LinJ.03.0350	intergenic_region	LinJ.03.0340-LinJ.03.0350	n.117040A>C
LinJ.03	117754	.	T	C	.	.	ANN=C	intergenic_region	MODIFIER	LinJ.03.0340-LinJ.03.0350	LinJ.03.0340-LinJ.03.0350	intergenic_region	LinJ.03.0340-LinJ.03.0350	n.117754T>C
LinJ.03	117946	.	T	G	.	.	ANN=G	intergenic_region	MODIFIER	LinJ.03.0340-LinJ.03.0350	LinJ.03.0340-LinJ.03.0350	intergenic_region	LinJ.03.0340-LinJ.03.0350	n.117946T>G
LinJ.03	118005	.	T	C	.	.	ANN=C	intergenic_region	MODIFIER	LinJ.03.0340-LinJ.03.0350	LinJ.03.0340-LinJ.03.0350	intergenic_region	LinJ.03.0340-LinJ.03.0350	n.118005T>C
LinJ.03	118022	.	C	G	.	.	ANN=G	intergenic_region	MODIFIER	LinJ.03.0340-LinJ.03.0350	LinJ.03.0340-LinJ.03.0350	intergenic_region	LinJ.03.0340-LinJ.03.0350	n.118022C>G
LinJ.03	118023	.	T	C	.	.	ANN=C	intergenic_region	MODIFIER	LinJ.03.0340-LinJ.03.0350	LinJ.03.0340-LinJ.03.0350	intergenic_region	LinJ.03.0340-LinJ.03.0350	n.118023T>C
LinJ.03	118076	.	C	T	.	.	ANN=T	intergenic_region	MODIFIER	LinJ.03.0340-LinJ.03.0350	LinJ.03.0340-LinJ.03.0350	intergenic_region	LinJ.03.0340-LinJ.03.0350	n.118076C>T
LinJ.03	118229	.	C	T	.	.	ANN=T	intergenic_region	MODIFIER	LinJ.03.0340-LinJ.03.0350	LinJ.03.0340-LinJ.03.0350	intergenic_region	LinJ.03.0340-LinJ.03.0350	n.118229C>T
LinJ.03	118276	.	G	C	.	.	ANN=C	intergenic_region	MODIFIER	LinJ.03.0340-LinJ.03.0350	LinJ.03.0340-LinJ.03.0350	intergenic_region	LinJ.03.0340-LinJ.03.0350	n.118276G>C
LinJ.03	119841	.	C	T	.	.	ANN=T	intergenic_region	MODIFIER	LinJ.03.0350-LinJ.03.0360	LinJ.03.0350-LinJ.03.0360	intergenic_region	LinJ.03.0350-LinJ.03.0360	n.119841C>T
LinJ.03	123464	.	T	C	.	.	ANN=C	intergenic_region	MODIFIER	LinJ.03.0360-LinJ.03.0370	LinJ.03.0360-LinJ.03.0370	intergenic_region	LinJ.03.0360-LinJ.03.0370	n.123464T>C
LinJ.03	123488	.	T	C	.	.	ANN=C	intergenic_region	MODIFIER	LinJ.03.0360-LinJ.03.0370	LinJ.03.0360-LinJ.03.0370	intergenic_region	LinJ.03.0360-LinJ.03.0370	n.123488T>C
LinJ.03	124122	.	A	G	.	.	ANN=G	intergenic_region	MODIFIER	LinJ.03.0360-LinJ.03.0370	LinJ.03.0360-LinJ.03.0370	intergenic_region	LinJ.03.0360-LinJ.03.0370	n.124122A>G
LinJ.03	128778	.	C	T	.	.	ANN=T	missense_variant	MODERATE	LinJ.03.0380	LinJ.03.0380	transcript	LinJ.03.0380:mRNA	protein_coding	2019-01-01	c.896C>T	p.Pro299Leu	896/912	896/912	299/303
LinJ.03	130021	.	A	C	.	.	ANN=C	intergenic_region	MODIFIER	LinJ.03.0380-LinJ.03.0390	LinJ.03.0380-LinJ.03.0390	intergenic_region	LinJ.03.0380-LinJ.03.0390	n.130021A>C
LinJ.03	136894	.	T	C	.	.	ANN=C	intergenic_region	MODIFIER	LinJ.03.0390-LinJ.03.0400	LinJ.03.0390-LinJ.03.0400	intergenic_region	LinJ.03.0390-LinJ.03.0400	n.136894T>C
LinJ.03	145373	.	A	C	.	.	ANN=C	intergenic_region	MODIFIER	LinJ.03.0420-LinJ.03.0430	LinJ.03.0420-LinJ.03.0430	intergenic_region	LinJ.03.0420-LinJ.03.0430	n.145373A>C
LinJ.03	146163	.	A	C	.	.	ANN=C	synonymous_variant	LOW	LinJ.03.0430	LinJ.03.0430	transcript	LinJ.03.0430:mRNA	protein_coding	2019-01-01	c.636A>C	p.Pro212Pro	636/5076	636/5076	212/1691
LinJ.03	146270	.	C	A	.	.	ANN=A	missense_variant	MODERATE	LinJ.03.0430	LinJ.03.0430	transcript	LinJ.03.0430:mRNA	protein_coding	2019-01-01	c.743C>A	p.Thr248Lys	743/5076	743/5076	248/1691
LinJ.03	146368	.	T	G	.	.	ANN=G	missense_variant	MODERATE	LinJ.03.0430	LinJ.03.0430	transcript	LinJ.03.0430:mRNA	protein_coding	2019-01-01	c.841T>G	p.Ser281Ala	841/5076	841/5076	281/1691
LinJ.03	147971	.	C	A	.	.	ANN=A	missense_variant	MODERATE	LinJ.03.0430	LinJ.03.0430	transcript	LinJ.03.0430:mRNA	protein_coding	2019-01-01	c.2444C>A	p.Ala815Glu	2444/5076	2444/5076	815/1691
LinJ.03	149983	.	A	G	.	.	ANN=G	missense_variant	MODERATE	LinJ.03.0430	LinJ.03.0430	transcript	LinJ.03.0430:mRNA	protein_coding	2019-01-01	c.4456A>G	p.Asn1486Asp	4456/5076	4456/5076	1486/1691
LinJ.03	183481	.	G	C	.	.	ANN=C	missense_variant	MODERATE	LinJ.03.0490	LinJ.03.0490	transcript	LinJ.03.0490:mRNA	protein_coding	2019-01-01	c.256G>C	p.Asp86His	256/7923	256/7923	86/2640
LinJ.03	186225	.	T	C	.	.	ANN=C	synonymous_variant	LOW	LinJ.03.0490	LinJ.03.0490	transcript	LinJ.03.0490:mRNA	protein_coding	2019-01-01	c.3000T>C	p.Arg1000Arg	3000/7923	3000/7923	1000/2640
LinJ.03	187485	.	A	G	.	.	ANN=G	synonymous_variant	LOW	LinJ.03.0490	LinJ.03.0490	transcript	LinJ.03.0490:mRNA	protein_coding	2019-01-01	c.4260A>G	p.Ala1420Ala	4260/7923	4260/7923	1420/2640
LinJ.03	204690	.	A	G	.	.	ANN=G	synonymous_variant	LOW	LinJ.03.0520	LinJ.03.0520	transcript	LinJ.03.0520:mRNA	protein_coding	2019-01-01	c.519A>G	p.Pro173Pro	519/1191	519/1191	173/396
LinJ.03	205969	.	G	C	.	.	ANN=C	intergenic_region	MODIFIER	LinJ.03.0520-LinJ.03.0530	LinJ.03.0520-LinJ.03.0530	intergenic_region	LinJ.03.0520-LinJ.03.0530	n.205969G>C
LinJ.03	210660	.	G	A	.	.	ANN=A	missense_variant	MODERATE	LinJ.03.0530	LinJ.03.0530	transcript	LinJ.03.0530:mRNA	protein_coding	2019-01-01	c.4016G>A	p.Gly1339Asp	4016/4335	4016/4335	1339/1444
LinJ.03	210701	.	G	A	.	.	ANN=A	missense_variant	MODERATE	LinJ.03.0530	LinJ.03.0530	transcript	LinJ.03.0530:mRNA	protein_coding	2019-01-01	c.4057G>A	p.Ala1353Thr	4057/4335	4057/4335	1353/1444
LinJ.03	213164	.	G	A	.	.	ANN=A	missense_variant	MODERATE	LinJ.03.0540	LinJ.03.0540	transcript	LinJ.03.0540:mRNA	protein_coding	2019-01-01	c.713G>A	p.Gly238Asp	713/2151	713/2151	238/716
LinJ.03	213451	.	C	T	.	.	ANN=T	missense_variant	MODERATE	LinJ.03.0540	LinJ.03.0540	transcript	LinJ.03.0540:mRNA	protein_coding	2019-01-01	c.1000C>T	p.Pro334Ser	1000/2151	1000/2151	334/716
LinJ.03	227706	.	A	G	.	.	ANN=G	intergenic_region	MODIFIER	LinJ.03.0580-LinJ.03.0590	LinJ.03.0580-LinJ.03.0590	intergenic_region	LinJ.03.0580-LinJ.03.0590	n.227706A>G
LinJ.03	228057	.	G	A	.	.	ANN=A	intergenic_region	MODIFIER	LinJ.03.0580-LinJ.03.0590	LinJ.03.0580-LinJ.03.0590	intergenic_region	LinJ.03.0580-LinJ.03.0590	n.228057G>A
LinJ.03	232417	.	T	C	.	.	ANN=C	intergenic_region	MODIFIER	LinJ.03.0600-LinJ.03.0610	LinJ.03.0600-LinJ.03.0610	intergenic_region	LinJ.03.0600-LinJ.03.0610	n.232417T>C
LinJ.03	249955	.	T	C	.	.	ANN=C	intergenic_region	MODIFIER	LinJ.03.0650-LinJ.03.0660	LinJ.03.0650-LinJ.03.0660	intergenic_region	LinJ.03.0650-LinJ.03.0660	n.249955T>C
LinJ.03	251167	.	A	C	.	.	ANN=C	intergenic_region	MODIFIER	LinJ.03.0650-LinJ.03.0660	LinJ.03.0650-LinJ.03.0660	intergenic_region	LinJ.03.0650-LinJ.03.0660	n.251167A>C
LinJ.03	255710	.	T	G	.	.	ANN=G	intergenic_region	MODIFIER	LinJ.03.0650-LinJ.03.0660	LinJ.03.0650-LinJ.03.0660	intergenic_region	LinJ.03.0650-LinJ.03.0660	n.255710T>G
LinJ.03	261208	.	G	A	.	.	ANN=A	intergenic_region	MODIFIER	LinJ.03.0660-LinJ.03.tRNA1	LinJ.03.0660-LinJ.03.tRNA1	intergenic_region	LinJ.03.0660-LinJ.03.tRNA1	n.261208G>A
LinJ.03	270059	.	A	G	.	.	ANN=G	synonymous_variant	LOW	LinJ.03.0680	LinJ.03.0680	transcript	LinJ.03.0680:mRNA	protein_coding	2019-01-01	c.8559T>C	p.Cys2853Cys	8559/8682	8559/8682	2853/2893
LinJ.03	270446	.	T	C	.	.	ANN=C	synonymous_variant	LOW	LinJ.03.0680	LinJ.03.0680	transcript	LinJ.03.0680:mRNA	protein_coding	2019-01-01	c.8172A>G	p.Glu2724Glu	8172/8682	8172/8682	2724/2893
LinJ.03	271243	.	G	A	.	.	ANN=A	missense_variant	MODERATE	LinJ.03.0680	LinJ.03.0680	transcript	LinJ.03.0680:mRNA	protein_coding	2019-01-01	c.7375C>T	p.Arg2459Trp	7375/8682	7375/8682	2459/2893
LinJ.03	271349	.	A	G	.	.	ANN=G	synonymous_variant	LOW	LinJ.03.0680	LinJ.03.0680	transcript	LinJ.03.0680:mRNA	protein_coding	2019-01-01	c.7269T>C	p.Asp2423Asp	7269/8682	7269/8682	2423/2893
LinJ.03	271598	.	T	C	.	.	ANN=C	synonymous_variant	LOW	LinJ.03.0680	LinJ.03.0680	transcript	LinJ.03.0680:mRNA	protein_coding	2019-01-01	c.7020A>G	p.Ala2340Ala	7020/8682	7020/8682	2340/2893
LinJ.03	272402	.	G	C	.	.	ANN=C	synonymous_variant	LOW	LinJ.03.0680	LinJ.03.0680	transcript	LinJ.03.0680:mRNA	protein_coding	2019-01-01	c.6216C>G	p.Val2072Val	6216/8682	6216/8682	2072/2893
LinJ.03	273212	.	T	C	.	.	ANN=C	synonymous_variant	LOW	LinJ.03.0680	LinJ.03.0680	transcript	LinJ.03.0680:mRNA	protein_coding	2019-01-01	c.5406A>G	p.Val1802Val	5406/8682	5406/8682	1802/2893
LinJ.03	288171	.	A	G	.	.	ANN=G	intergenic_region	MODIFIER	LinJ.03.0720-LinJ.03.0730	LinJ.03.0720-LinJ.03.0730	intergenic_region	LinJ.03.0720-LinJ.03.0730	n.288171A>G
LinJ.03	288518	.	T	C	.	.	ANN=C	intergenic_region	MODIFIER	LinJ.03.0720-LinJ.03.0730	LinJ.03.0720-LinJ.03.0730	intergenic_region	LinJ.03.0720-LinJ.03.0730	n.288518T>C
LinJ.03	292391	.	C	T	.	.	ANN=T	missense_variant	MODERATE	LinJ.03.0740	LinJ.03.0740	transcript	LinJ.03.0740:mRNA	protein_coding	2019-01-01	c.158G>A	p.Cys53Tyr	158/954	158/954	53/317
LinJ.03	302907	.	G	C	.	.	ANN=C	synonymous_variant	LOW	LinJ.03.0770	LinJ.03.0770	transcript	LinJ.03.0770:mRNA	protein_coding	2019-01-01	c.2250C>G	p.Pro750Pro	2250/2961	2250/2961	750/986	WARNING_TRANSCRIPT_NO_STOP_CODON
LinJ.03	308379	.	A	C	.	.	ANN=C	intergenic_region	MODIFIER	LinJ.03.0780-LinJ.03.0790	LinJ.03.0780-LinJ.03.0790	intergenic_region	LinJ.03.0780-LinJ.03.0790	n.308379A>C
LinJ.03	309769	.	C	G	.	.	ANN=G	synonymous_variant	LOW	LinJ.03.0790	LinJ.03.0790	transcript	LinJ.03.0790:mRNA	protein_coding	2019-01-01	c.6249G>C	p.Val2083Val	6249/7182	6249/7182	2083/2393
LinJ.04	64787	.	A	C	.	.	ANN=C	intergenic_region	MODIFIER	LinJ.04.0200-LinJ.04.0210	LinJ.04.0200-LinJ.04.0210	intergenic_region	LinJ.04.0200-LinJ.04.0210	n.64787A>C
LinJ.04	121567	.	C	T	.	.	ANN=T	intergenic_region	MODIFIER	LinJ.04.0360-LinJ.04.0370	LinJ.04.0360-LinJ.04.0370	intergenic_region	LinJ.04.0360-LinJ.04.0370	n.121567C>T
LinJ.04	121581	.	A	G	.	.	ANN=G	intergenic_region	MODIFIER	LinJ.04.0360-LinJ.04.0370	LinJ.04.0360-LinJ.04.0370	intergenic_region	LinJ.04.0360-LinJ.04.0370	n.121581A>G
LinJ.04	121584	.	G	T	.	.	ANN=T	intergenic_region	MODIFIER	LinJ.04.0360-LinJ.04.0370	LinJ.04.0360-LinJ.04.0370	intergenic_region	LinJ.04.0360-LinJ.04.0370	n.121584G>T
LinJ.04	121655	.	G	A	.	.	ANN=A	intergenic_region	MODIFIER	LinJ.04.0360-LinJ.04.0370	LinJ.04.0360-LinJ.04.0370	intergenic_region	LinJ.04.0360-LinJ.04.0370	n.121655G>A
LinJ.04	121710	.	G	A	.	.	ANN=A	intergenic_region	MODIFIER	LinJ.04.0360-LinJ.04.0370	LinJ.04.0360-LinJ.04.0370	intergenic_region	LinJ.04.0360-LinJ.04.0370	n.121710G>A
LinJ.04	121730	.	G	A	.	.	ANN=A	intergenic_region	MODIFIER	LinJ.04.0360-LinJ.04.0370	LinJ.04.0360-LinJ.04.0370	intergenic_region	LinJ.04.0360-LinJ.04.0370	n.121730G>A
LinJ.04	121741	.	G	A	.	.	ANN=A	intergenic_region	MODIFIER	LinJ.04.0360-LinJ.04.0370	LinJ.04.0360-LinJ.04.0370	intergenic_region	LinJ.04.0360-LinJ.04.0370	n.121741G>A
LinJ.04	121798	.	C	T	.	.	ANN=T	intergenic_region	MODIFIER	LinJ.04.0360-LinJ.04.0370	LinJ.04.0360-LinJ.04.0370	intergenic_region	LinJ.04.0360-LinJ.04.0370	n.121798C>T
LinJ.04	121881	.	T	C	.	.	ANN=C	intergenic_region	MODIFIER	LinJ.04.0360-LinJ.04.0370	LinJ.04.0360-LinJ.04.0370	intergenic_region	LinJ.04.0360-LinJ.04.0370	n.121881T>C
LinJ.04	121911	.	T	G	.	.	ANN=G	intergenic_region	MODIFIER	LinJ.04.0360-LinJ.04.0370	LinJ.04.0360-LinJ.04.0370	intergenic_region	LinJ.04.0360-LinJ.04.0370	n.121911T>G
LinJ.04	121995	.	C	T	.	.	ANN=T	intergenic_region	MODIFIER	LinJ.04.0360-LinJ.04.0370	LinJ.04.0360-LinJ.04.0370	intergenic_region	LinJ.04.0360-LinJ.04.0370	n.121995C>T
LinJ.04	122060	.	C	T	.	.	ANN=T	intergenic_region	MODIFIER	LinJ.04.0360-LinJ.04.0370	LinJ.04.0360-LinJ.04.0370	intergenic_region	LinJ.04.0360-LinJ.04.0370	n.122060C>T
LinJ.04	122080	.	G	A	.	.	ANN=A	intergenic_region	MODIFIER	LinJ.04.0360-LinJ.04.0370	LinJ.04.0360-LinJ.04.0370	intergenic_region	LinJ.04.0360-LinJ.04.0370	n.122080G>A
LinJ.04	122097	.	G	A	.	.	ANN=A	intergenic_region	MODIFIER	LinJ.04.0360-LinJ.04.0370	LinJ.04.0360-LinJ.04.0370	intergenic_region	LinJ.04.0360-LinJ.04.0370	n.122097G>A
LinJ.04	180825	.	T	G	.	.	ANN=G	synonymous_variant	LOW	LinJ.04.0480	LinJ.04.0480	transcript	LinJ.04.0480:mRNA	protein_coding	2019-01-01	c.882A>C	p.Leu294Leu	882/972	882/972	294/323
LinJ.04	212288	.	A	C	.	.	ANN=C	intergenic_region	MODIFIER	LinJ.04.0530-LinJ.04.0540	LinJ.04.0530-LinJ.04.0540	intergenic_region	LinJ.04.0530-LinJ.04.0540	n.212288A>C
LinJ.04	215409	.	T	A	.	.	ANN=A	missense_variant	MODERATE	LinJ.04.0540	LinJ.04.0540	transcript	LinJ.04.0540:mRNA	protein_coding	2019-01-01	c.1903A>T	p.Thr635Ser	1903/4653	1903/4653	635/1550
LinJ.04	217243	.	A	G	.	.	ANN=G	synonymous_variant	LOW	LinJ.04.0540	LinJ.04.0540	transcript	LinJ.04.0540:mRNA	protein_coding	2019-01-01	c.69T>C	p.His23His	69/4653	69/4653	23/1550
LinJ.04	217744	.	C	T,A	.	.	ANN=T	intergenic_region	MODIFIER	LinJ.04.0540-LinJ.04.0550	LinJ.04.0540-LinJ.04.0550	intergenic_region	LinJ.04.0540-LinJ.04.0550	n.217744C>T	,A	intergenic_region	MODIFIER	LinJ.04.0540-LinJ.04.0550	LinJ.04.0540-LinJ.04.0550	intergenic_region	LinJ.04.0540-LinJ.04.0550	n.217744C>A
LinJ.04	226709	.	T	C	.	.	ANN=C	missense_variant	MODERATE	LinJ.04.0560	LinJ.04.0560	transcript	LinJ.04.0560:mRNA	protein_coding	2019-01-01	c.3695A>G	p.Gln1232Arg	3695/4707	3695/4707	1232/1568
LinJ.04	226783	.	G	A	.	.	ANN=A	synonymous_variant	LOW	LinJ.04.0560	LinJ.04.0560	transcript	LinJ.04.0560:mRNA	protein_coding	2019-01-01	c.3621C>T	p.Tyr1207Tyr	3621/4707	3621/4707	1207/1568
LinJ.04	227355	.	T	C	.	.	ANN=C	missense_variant	MODERATE	LinJ.04.0560	LinJ.04.0560	transcript	LinJ.04.0560:mRNA	protein_coding	2019-01-01	c.3049A>G	p.Ser1017Gly	3049/4707	3049/4707	1017/1568
LinJ.04	263214	.	T	A	.	.	ANN=A	synonymous_variant	LOW	LinJ.04.0650	LinJ.04.0650	transcript	LinJ.04.0650:mRNA	protein_coding	2019-01-01	c.2310A>T	p.Leu770Leu	2310/3786	2310/3786	770/1261
LinJ.04	263612	.	A	G	.	.	ANN=G	missense_variant	MODERATE	LinJ.04.0650	LinJ.04.0650	transcript	LinJ.04.0650:mRNA	protein_coding	2019-01-01	c.1912T>C	p.Phe638Leu	1912/3786	1912/3786	638/1261
LinJ.04	263651	.	T	C	.	.	ANN=C	missense_variant	MODERATE	LinJ.04.0650	LinJ.04.0650	transcript	LinJ.04.0650:mRNA	protein_coding	2019-01-01	c.1873A>G	p.Thr625Ala	1873/3786	1873/3786	625/1261
LinJ.04	268188	.	T	G	.	.	ANN=G	intergenic_region	MODIFIER	LinJ.04.0660-LinJ.04.0670	LinJ.04.0660-LinJ.04.0670	intergenic_region	LinJ.04.0660-LinJ.04.0670	n.268188T>G
LinJ.04	268711	.	G	C	.	.	ANN=C	synonymous_variant	LOW	LinJ.04.0670	LinJ.04.0670	transcript	LinJ.04.0670:mRNA	protein_coding	2019-01-01	c.213C>G	p.Gly71Gly	213/459	213/459	71/152
LinJ.04	269562	.	C	A	.	.	ANN=A	intergenic_region	MODIFIER	LinJ.04.0670-LinJ.04.0680	LinJ.04.0670-LinJ.04.0680	intergenic_region	LinJ.04.0670-LinJ.04.0680	n.269562C>A
LinJ.04	270798	.	T	C	.	.	ANN=C	intergenic_region	MODIFIER	LinJ.04.0680-LinJ.04.0690	LinJ.04.0680-LinJ.04.0690	intergenic_region	LinJ.04.0680-LinJ.04.0690	n.270798T>C
LinJ.04	271084	.	A	T	.	.	ANN=T	intergenic_region	MODIFIER	LinJ.04.0680-LinJ.04.0690	LinJ.04.0680-LinJ.04.0690	intergenic_region	LinJ.04.0680-LinJ.04.0690	n.271084A>T
LinJ.04	271155	.	C	A	.	.	ANN=A	intergenic_region	MODIFIER	LinJ.04.0680-LinJ.04.0690	LinJ.04.0680-LinJ.04.0690	intergenic_region	LinJ.04.0680-LinJ.04.0690	n.271155C>A
LinJ.04	271321	.	G	A	.	.	ANN=A	intergenic_region	MODIFIER	LinJ.04.0680-LinJ.04.0690	LinJ.04.0680-LinJ.04.0690	intergenic_region	LinJ.04.0680-LinJ.04.0690	n.271321G>A
LinJ.04	271530	.	G	T	.	.	ANN=T	intergenic_region	MODIFIER	LinJ.04.0680-LinJ.04.0690	LinJ.04.0680-LinJ.04.0690	intergenic_region	LinJ.04.0680-LinJ.04.0690	n.271530G>T
LinJ.04	271774	.	A	C	.	.	ANN=C	intergenic_region	MODIFIER	LinJ.04.0680-LinJ.04.0690	LinJ.04.0680-LinJ.04.0690	intergenic_region	LinJ.04.0680-LinJ.04.0690	n.271774A>C
LinJ.04	271838	.	G	A	.	.	ANN=A	intergenic_region	MODIFIER	LinJ.04.0680-LinJ.04.0690	LinJ.04.0680-LinJ.04.0690	intergenic_region	LinJ.04.0680-LinJ.04.0690	n.271838G>A
LinJ.04	276228	.	G	C	.	.	ANN=C	synonymous_variant	LOW	LinJ.04.0700	LinJ.04.0700	transcript	LinJ.04.0700:mRNA	protein_coding	2019-01-01	c.2337C>G	p.Ala779Ala	2337/2769	2337/2769	779/922	WARNING_TRANSCRIPT_NO_STOP_CODON
LinJ.04	281780	.	T	C	.	.	ANN=C	synonymous_variant	LOW	LinJ.04.0710	LinJ.04.0710	transcript	LinJ.04.0710:mRNA	protein_coding	2019-01-01	c.594A>G	p.Gln198Gln	594/2385	594/2385	198/794
LinJ.04	282012	.	T	C	.	.	ANN=C	missense_variant	MODERATE	LinJ.04.0710	LinJ.04.0710	transcript	LinJ.04.0710:mRNA	protein_coding	2019-01-01	c.362A>G	p.Glu121Gly	362/2385	362/2385	121/794
LinJ.04	283651	.	A	G	.	.	ANN=G	intergenic_region	MODIFIER	LinJ.04.0710-LinJ.04.0720	LinJ.04.0710-LinJ.04.0720	intergenic_region	LinJ.04.0710-LinJ.04.0720	n.283651A>G
LinJ.04	283653	.	T	G	.	.	ANN=G	intergenic_region	MODIFIER	LinJ.04.0710-LinJ.04.0720	LinJ.04.0710-LinJ.04.0720	intergenic_region	LinJ.04.0710-LinJ.04.0720	n.283653T>G
LinJ.04	285178	.	C	T	.	.	ANN=T	intergenic_region	MODIFIER	LinJ.04.0710-LinJ.04.0720	LinJ.04.0710-LinJ.04.0720	intergenic_region	LinJ.04.0710-LinJ.04.0720	n.285178C>T
LinJ.04	285182	.	T	C	.	.	ANN=C	intergenic_region	MODIFIER	LinJ.04.0710-LinJ.04.0720	LinJ.04.0710-LinJ.04.0720	intergenic_region	LinJ.04.0710-LinJ.04.0720	n.285182T>C
LinJ.04	290424	.	T	C	.	.	ANN=C	missense_variant	MODERATE	LinJ.04.0730	LinJ.04.0730	transcript	LinJ.04.0730:mRNA	protein_coding	2019-01-01	c.853A>G	p.Ile285Val	853/1911	853/1911	285/636
LinJ.04	290933	.	G	A	.	.	ANN=A	missense_variant	MODERATE	LinJ.04.0730	LinJ.04.0730	transcript	LinJ.04.0730:mRNA	protein_coding	2019-01-01	c.344C>T	p.Ala115Val	344/1911	344/1911	115/636
LinJ.04	291184	.	T	C	.	.	ANN=C	synonymous_variant	LOW	LinJ.04.0730	LinJ.04.0730	transcript	LinJ.04.0730:mRNA	protein_coding	2019-01-01	c.93A>G	p.Val31Val	93/1911	93/1911	31/636
LinJ.04	291388	.	T	C	.	.	ANN=C	intergenic_region	MODIFIER	LinJ.04.0730-LinJ.04.0740	LinJ.04.0730-LinJ.04.0740	intergenic_region	LinJ.04.0730-LinJ.04.0740	n.291388T>C
LinJ.04	293512	.	C	T	.	.	ANN=T	missense_variant	MODERATE	LinJ.04.0740	LinJ.04.0740	transcript	LinJ.04.0740:mRNA	protein_coding	2019-01-01	c.926G>A	p.Ser309Asn	926/2433	926/2433	309/810
LinJ.04	293889	.	T	C	.	.	ANN=C	synonymous_variant	LOW	LinJ.04.0740	LinJ.04.0740	transcript	LinJ.04.0740:mRNA	protein_coding	2019-01-01	c.549A>G	p.Ser183Ser	549/2433	549/2433	183/810
LinJ.04	294264	.	G	A	.	.	ANN=A	synonymous_variant	LOW	LinJ.04.0740	LinJ.04.0740	transcript	LinJ.04.0740:mRNA	protein_coding	2019-01-01	c.174C>T	p.Cys58Cys	174/2433	174/2433	58/810
LinJ.04	313858	.	G	A	.	.	ANN=A	intergenic_region	MODIFIER	LinJ.04.0810-LinJ.04.0820	LinJ.04.0810-LinJ.04.0820	intergenic_region	LinJ.04.0810-LinJ.04.0820	n.313858G>A
LinJ.04	356113	.	A	G	.	.	ANN=G	intergenic_region	MODIFIER	LinJ.04.0920-LinJ.04.0930	LinJ.04.0920-LinJ.04.0930	intergenic_region	LinJ.04.0920-LinJ.04.0930	n.356113A>G
LinJ.04	356119	.	T	C	.	.	ANN=C	intergenic_region	MODIFIER	LinJ.04.0920-LinJ.04.0930	LinJ.04.0920-LinJ.04.0930	intergenic_region	LinJ.04.0920-LinJ.04.0930	n.356119T>C
LinJ.04	357404	.	T	C	.	.	ANN=C	intergenic_region	MODIFIER	LinJ.04.0920-LinJ.04.0930	LinJ.04.0920-LinJ.04.0930	intergenic_region	LinJ.04.0920-LinJ.04.0930	n.357404T>C
LinJ.04	387394	.	A	G	.	.	ANN=G	intergenic_region	MODIFIER	LinJ.04.1040-LinJ.04.1050	LinJ.04.1040-LinJ.04.1050	intergenic_region	LinJ.04.1040-LinJ.04.1050	n.387394A>G
LinJ.04	388009	.	C	T	.	.	ANN=T	intergenic_region	MODIFIER	LinJ.04.1040-LinJ.04.1050	LinJ.04.1040-LinJ.04.1050	intergenic_region	LinJ.04.1040-LinJ.04.1050	n.388009C>T
LinJ.04	389701	.	A	G	.	.	ANN=G	synonymous_variant	LOW	LinJ.04.1050	LinJ.04.1050	transcript	LinJ.04.1050:mRNA	protein_coding	2019-01-01	c.534T>C	p.Arg178Arg	534/1071	534/1071	178/356
LinJ.04	391298	.	G	T	.	.	ANN=T	intergenic_region	MODIFIER	LinJ.04.1050-LinJ.04.1060	LinJ.04.1050-LinJ.04.1060	intergenic_region	LinJ.04.1050-LinJ.04.1060	n.391298G>T
LinJ.04	393866	.	C	T	.	.	ANN=T	intergenic_region	MODIFIER	LinJ.04.1070-LinJ.04.1080	LinJ.04.1070-LinJ.04.1080	intergenic_region	LinJ.04.1070-LinJ.04.1080	n.393866C>T
LinJ.04	395377	.	T	C	.	.	ANN=C	missense_variant	MODERATE	LinJ.04.1080	LinJ.04.1080	transcript	LinJ.04.1080:mRNA	protein_coding	2019-01-01	c.1711A>G	p.Ser571Gly	1711/2631	1711/2631	571/876
LinJ.04	396260	.	C	G	.	.	ANN=G	synonymous_variant	LOW	LinJ.04.1080	LinJ.04.1080	transcript	LinJ.04.1080:mRNA	protein_coding	2019-01-01	c.828G>C	p.Gly276Gly	828/2631	828/2631	276/876
LinJ.04	402668	.	T	G	.	.	ANN=G	missense_variant	MODERATE	LinJ.04.1100	LinJ.04.1100	transcript	LinJ.04.1100:mRNA	protein_coding	2019-01-01	c.3671A>C	p.Glu1224Ala	3671/3924	3671/3924	1224/1307
LinJ.04	402811	.	C	T	.	.	ANN=T	synonymous_variant	LOW	LinJ.04.1100	LinJ.04.1100	transcript	LinJ.04.1100:mRNA	protein_coding	2019-01-01	c.3528G>A	p.Ser1176Ser	3528/3924	3528/3924	1176/1307
LinJ.04	403786	.	A	C	.	.	ANN=C	synonymous_variant	LOW	LinJ.04.1100	LinJ.04.1100	transcript	LinJ.04.1100:mRNA	protein_coding	2019-01-01	c.2553T>G	p.Ala851Ala	2553/3924	2553/3924	851/1307
LinJ.04	405280	.	C	A	.	.	ANN=A	synonymous_variant	LOW	LinJ.04.1100	LinJ.04.1100	transcript	LinJ.04.1100:mRNA	protein_coding	2019-01-01	c.1059G>T	p.Arg353Arg	1059/3924	1059/3924	353/1307
LinJ.05	30139	.	G	C	.	.	ANN=C	synonymous_variant	LOW	LinJ.05.0100	LinJ.05.0100	transcript	LinJ.05.0100:mRNA	protein_coding	2019-01-01	c.1155G>C	p.Leu385Leu	1155/1914	1155/1914	385/637
LinJ.05	70253	.	T	G	.	.	ANN=G	missense_variant	MODERATE	LinJ.05.0220	LinJ.05.0220	transcript	LinJ.05.0220:mRNA	protein_coding	2019-01-01	c.1420T>G	p.Leu474Val	1420/2016	1420/2016	474/671
LinJ.05	146052	.	C	G	.	.	ANN=G	intergenic_region	MODIFIER	LinJ.05.0440-LinJ.05.0450	LinJ.05.0440-LinJ.05.0450	intergenic_region	LinJ.05.0440-LinJ.05.0450	n.146052C>G
LinJ.05	146222	.	G	A	.	.	ANN=A	intergenic_region	MODIFIER	LinJ.05.0440-LinJ.05.0450	LinJ.05.0440-LinJ.05.0450	intergenic_region	LinJ.05.0440-LinJ.05.0450	n.146222G>A
LinJ.05	151700	.	A	G	.	.	ANN=G	synonymous_variant	LOW	LinJ.05.0470	LinJ.05.0470	transcript	LinJ.05.0470:mRNA	protein_coding	2019-01-01	c.321A>G	p.Arg107Arg	321/729	321/729	107/242
LinJ.05	188972	.	A	G	.	.	ANN=G	missense_variant	MODERATE	LinJ.05.0580	LinJ.05.0580	transcript	LinJ.05.0580:mRNA	protein_coding	2019-01-01	c.1783A>G	p.Met595Val	1783/2340	1783/2340	595/779
LinJ.05	196815	.	C	T	.	.	ANN=T	synonymous_variant	LOW	LinJ.05.0600	LinJ.05.0600	transcript	LinJ.05.0600:mRNA	protein_coding	2019-01-01	c.1077C>T	p.Gly359Gly	1077/2721	1077/2721	359/906
LinJ.05	197125	.	A	G	.	.	ANN=G	missense_variant	MODERATE	LinJ.05.0600	LinJ.05.0600	transcript	LinJ.05.0600:mRNA	protein_coding	2019-01-01	c.1387A>G	p.Thr463Ala	1387/2721	1387/2721	463/906
LinJ.05	197637	.	T	C	.	.	ANN=C	synonymous_variant	LOW	LinJ.05.0600	LinJ.05.0600	transcript	LinJ.05.0600:mRNA	protein_coding	2019-01-01	c.1899T>C	p.Gly633Gly	1899/2721	1899/2721	633/906
LinJ.05	198170	.	T	C	.	.	ANN=C	missense_variant	MODERATE	LinJ.05.0600	LinJ.05.0600	transcript	LinJ.05.0600:mRNA	protein_coding	2019-01-01	c.2432T>C	p.Ile811Thr	2432/2721	2432/2721	811/906
LinJ.05	198454	.	C	T	.	.	ANN=T	synonymous_variant	LOW	LinJ.05.0600	LinJ.05.0600	transcript	LinJ.05.0600:mRNA	protein_coding	2019-01-01	c.2716C>T	p.Leu906Leu	2716/2721	2716/2721	906/906
LinJ.05	198682	.	G	A	.	.	ANN=A	intergenic_region	MODIFIER	LinJ.05.0600-LinJ.05.0610	LinJ.05.0600-LinJ.05.0610	intergenic_region	LinJ.05.0600-LinJ.05.0610	n.198682G>A
LinJ.05	198690	.	G	A	.	.	ANN=A	intergenic_region	MODIFIER	LinJ.05.0600-LinJ.05.0610	LinJ.05.0600-LinJ.05.0610	intergenic_region	LinJ.05.0600-LinJ.05.0610	n.198690G>A
LinJ.05	199382	.	A	G	.	.	ANN=G	missense_variant	MODERATE	LinJ.05.0610	LinJ.05.0610	transcript	LinJ.05.0610:mRNA	protein_coding	2019-01-01	c.170A>G	p.Asp57Gly	170/2943	170/2943	57/980
LinJ.05	280738	.	G	A	.	.	ANN=A	missense_variant	MODERATE	LinJ.05.0760	LinJ.05.0760	transcript	LinJ.05.0760:mRNA	protein_coding	2019-01-01	c.3137G>A	p.Gly1046Asp	3137/4593	3137/4593	1046/1530
LinJ.05	291162	.	C	G	.	.	ANN=G	intergenic_region	MODIFIER	LinJ.05.0780-LinJ.05.0790	LinJ.05.0780-LinJ.05.0790	intergenic_region	LinJ.05.0780-LinJ.05.0790	n.291162C>G
LinJ.05	424985	.	A	G	.	.	ANN=G	synonymous_variant	LOW	LinJ.05.1160	LinJ.05.1160	transcript	LinJ.05.1160:mRNA	protein_coding	2019-01-01	c.42T>C	p.Ser14Ser	42/750	42/750	14/249
LinJ.05	427573	.	A	G	.	.	ANN=G	intergenic_region	MODIFIER	LinJ.05.1170-LinJ.05.1180	LinJ.05.1170-LinJ.05.1180	intergenic_region	LinJ.05.1170-LinJ.05.1180	n.427573A>G
LinJ.05	433902	.	C	T	.	.	ANN=T	missense_variant	MODERATE	LinJ.05.1180	LinJ.05.1180	transcript	LinJ.05.1180:mRNA	protein_coding	2019-01-01	c.850G>A	p.Gly284Ser	850/5880	850/5880	284/1959
LinJ.05	437761	.	C	A	.	.	ANN=A	intergenic_region	MODIFIER	LinJ.05.1200-LinJ.05.1210	LinJ.05.1200-LinJ.05.1210	intergenic_region	LinJ.05.1200-LinJ.05.1210	n.437761C>A
LinJ.05	445135	.	G	T	.	.	ANN=T	intergenic_region	MODIFIER	LinJ.05.1210-LinJ.05.snoRNA1	LinJ.05.1210-LinJ.05.snoRNA1	intergenic_region	LinJ.05.1210-LinJ.05.snoRNA1	n.445135G>T
LinJ.05	445517	.	C	T	.	.	ANN=T	intergenic_region	MODIFIER	LinJ.05.1210-LinJ.05.snoRNA1	LinJ.05.1210-LinJ.05.snoRNA1	intergenic_region	LinJ.05.1210-LinJ.05.snoRNA1	n.445517C>T
LinJ.05	446242	.	A	G	.	.	ANN=G	intergenic_region	MODIFIER	LinJ.05.1210-LinJ.05.snoRNA1	LinJ.05.1210-LinJ.05.snoRNA1	intergenic_region	LinJ.05.1210-LinJ.05.snoRNA1	n.446242A>G
LinJ.05	446252	.	C	A	.	.	ANN=A	intergenic_region	MODIFIER	LinJ.05.1210-LinJ.05.snoRNA1	LinJ.05.1210-LinJ.05.snoRNA1	intergenic_region	LinJ.05.1210-LinJ.05.snoRNA1	n.446252C>A
LinJ.05	446259	.	C	A	.	.	ANN=A	intergenic_region	MODIFIER	LinJ.05.1210-LinJ.05.snoRNA1	LinJ.05.1210-LinJ.05.snoRNA1	intergenic_region	LinJ.05.1210-LinJ.05.snoRNA1	n.446259C>A
LinJ.06	11553	.	T	A	.	.	ANN=A	intergenic_region	MODIFIER	LinJ.06.0020-LinJ.06.0030	LinJ.06.0020-LinJ.06.0030	intergenic_region	LinJ.06.0020-LinJ.06.0030	n.11553T>A
LinJ.06	13809	.	G	A	.	.	ANN=A	intergenic_region	MODIFIER	LinJ.06.0020-LinJ.06.0030	LinJ.06.0020-LinJ.06.0030	intergenic_region	LinJ.06.0020-LinJ.06.0030	n.13809G>A
LinJ.06	15403	.	G	T	.	.	ANN=T	missense_variant	MODERATE	LinJ.06.0030	LinJ.06.0030	transcript	LinJ.06.0030:mRNA	protein_coding	2019-01-01	c.465C>A	p.Asp155Glu	465/2028	465/2028	155/675
LinJ.06	16295	.	C	G	.	.	ANN=G	intergenic_region	MODIFIER	LinJ.06.0030-LinJ.06.0040	LinJ.06.0030-LinJ.06.0040	intergenic_region	LinJ.06.0030-LinJ.06.0040	n.16295C>G
LinJ.06	20454	.	C	T	.	.	ANN=T	intergenic_region	MODIFIER	LinJ.06.0040-LinJ.06.0050	LinJ.06.0040-LinJ.06.0050	intergenic_region	LinJ.06.0040-LinJ.06.0050	n.20454C>T
LinJ.06	24849	.	G	C	.	.	ANN=C	intergenic_region	MODIFIER	LinJ.06.0050-LinJ.06.0060	LinJ.06.0050-LinJ.06.0060	intergenic_region	LinJ.06.0050-LinJ.06.0060	n.24849G>C
LinJ.06	27402	.	A	G	.	.	ANN=G	intergenic_region	MODIFIER	LinJ.06.0050-LinJ.06.0060	LinJ.06.0050-LinJ.06.0060	intergenic_region	LinJ.06.0050-LinJ.06.0060	n.27402A>G
LinJ.06	32732	.	G	A	.	.	ANN=A	intergenic_region	MODIFIER	LinJ.06.0070-LinJ.06.0080	LinJ.06.0070-LinJ.06.0080	intergenic_region	LinJ.06.0070-LinJ.06.0080	n.32732G>A
LinJ.06	32887	.	A	G	.	.	ANN=G	intergenic_region	MODIFIER	LinJ.06.0070-LinJ.06.0080	LinJ.06.0070-LinJ.06.0080	intergenic_region	LinJ.06.0070-LinJ.06.0080	n.32887A>G
LinJ.06	33647	.	C	T	.	.	ANN=T	intergenic_region	MODIFIER	LinJ.06.0070-LinJ.06.0080	LinJ.06.0070-LinJ.06.0080	intergenic_region	LinJ.06.0070-LinJ.06.0080	n.33647C>T
LinJ.06	36950	.	G	A	.	.	ANN=A	intergenic_region	MODIFIER	LinJ.06.0080-LinJ.06.0090	LinJ.06.0080-LinJ.06.0090	intergenic_region	LinJ.06.0080-LinJ.06.0090	n.36950G>A
LinJ.06	52175	.	T	G	.	.	ANN=G	intergenic_region	MODIFIER	LinJ.06.0130-LinJ.06.0140	LinJ.06.0130-LinJ.06.0140	intergenic_region	LinJ.06.0130-LinJ.06.0140	n.52175T>G
LinJ.06	94610	.	A	G	.	.	ANN=G	synonymous_variant	LOW	LinJ.06.0280	LinJ.06.0280	transcript	LinJ.06.0280:mRNA	protein_coding	2019-01-01	c.231T>C	p.Ile77Ile	231/2568	231/2568	77/855
LinJ.06	95577	.	A	G	.	.	ANN=G	intergenic_region	MODIFIER	LinJ.06.0280-LinJ.06.0290	LinJ.06.0280-LinJ.06.0290	intergenic_region	LinJ.06.0280-LinJ.06.0290	n.95577A>G
LinJ.06	96508	.	G	A	.	.	ANN=A	intergenic_region	MODIFIER	LinJ.06.0280-LinJ.06.0290	LinJ.06.0280-LinJ.06.0290	intergenic_region	LinJ.06.0280-LinJ.06.0290	n.96508G>A
LinJ.06	101883	.	T	C	.	.	ANN=C	intergenic_region	MODIFIER	LinJ.06.0300-LinJ.06.0310	LinJ.06.0300-LinJ.06.0310	intergenic_region	LinJ.06.0300-LinJ.06.0310	n.101883T>C
LinJ.06	112236	.	T	C	.	.	ANN=C	missense_variant	MODERATE	LinJ.06.0330	LinJ.06.0330	transcript	LinJ.06.0330:mRNA	protein_coding	2019-01-01	c.2915A>G	p.His972Arg	2915/3555	2915/3555	972/1184
LinJ.06	130390	.	G	C	.	.	ANN=C	intergenic_region	MODIFIER	LinJ.06.0370-LinJ.06.0380	LinJ.06.0370-LinJ.06.0380	intergenic_region	LinJ.06.0370-LinJ.06.0380	n.130390G>C
LinJ.06	130478	.	C	A	.	.	ANN=A	intergenic_region	MODIFIER	LinJ.06.0370-LinJ.06.0380	LinJ.06.0370-LinJ.06.0380	intergenic_region	LinJ.06.0370-LinJ.06.0380	n.130478C>A
LinJ.06	130632	.	A	T	.	.	ANN=T	intergenic_region	MODIFIER	LinJ.06.0370-LinJ.06.0380	LinJ.06.0370-LinJ.06.0380	intergenic_region	LinJ.06.0370-LinJ.06.0380	n.130632A>T
LinJ.06	130705	.	G	T	.	.	ANN=T	intergenic_region	MODIFIER	LinJ.06.0370-LinJ.06.0380	LinJ.06.0370-LinJ.06.0380	intergenic_region	LinJ.06.0370-LinJ.06.0380	n.130705G>T
LinJ.06	130925	.	A	G	.	.	ANN=G	intergenic_region	MODIFIER	LinJ.06.0370-LinJ.06.0380	LinJ.06.0370-LinJ.06.0380	intergenic_region	LinJ.06.0370-LinJ.06.0380	n.130925A>G
LinJ.06	131082	.	C	A	.	.	ANN=A	intergenic_region	MODIFIER	LinJ.06.0370-LinJ.06.0380	LinJ.06.0370-LinJ.06.0380	intergenic_region	LinJ.06.0370-LinJ.06.0380	n.131082C>A
LinJ.06	131089	.	T	C	.	.	ANN=C	intergenic_region	MODIFIER	LinJ.06.0370-LinJ.06.0380	LinJ.06.0370-LinJ.06.0380	intergenic_region	LinJ.06.0370-LinJ.06.0380	n.131089T>C
LinJ.06	131095	.	G	A	.	.	ANN=A	intergenic_region	MODIFIER	LinJ.06.0370-LinJ.06.0380	LinJ.06.0370-LinJ.06.0380	intergenic_region	LinJ.06.0370-LinJ.06.0380	n.131095G>A
LinJ.06	131149	.	T	C	.	.	ANN=C	missense_variant	MODERATE	LinJ.06.0380	LinJ.06.0380	transcript	LinJ.06.0380:mRNA	protein_coding	2019-01-01	c.19T>C	p.Cys7Arg	19/1206	19/1206	7/401
LinJ.06	131159	.	T	C	.	.	ANN=C	missense_variant	MODERATE	LinJ.06.0380	LinJ.06.0380	transcript	LinJ.06.0380:mRNA	protein_coding	2019-01-01	c.29T>C	p.Leu10Pro	29/1206	29/1206	10/401
LinJ.06	133529	.	C	T	.	.	ANN=T	missense_variant	MODERATE	LinJ.06.0390	LinJ.06.0390	transcript	LinJ.06.0390:mRNA	protein_coding	2019-01-01	c.242C>T	p.Ala81Val	242/2724	242/2724	81/907
LinJ.06	134265	.	C	T	.	.	ANN=T	synonymous_variant	LOW	LinJ.06.0390	LinJ.06.0390	transcript	LinJ.06.0390:mRNA	protein_coding	2019-01-01	c.978C>T	p.Ser326Ser	978/2724	978/2724	326/907
LinJ.06	134525	.	A	G	.	.	ANN=G	missense_variant	MODERATE	LinJ.06.0390	LinJ.06.0390	transcript	LinJ.06.0390:mRNA	protein_coding	2019-01-01	c.1238A>G	p.His413Arg	1238/2724	1238/2724	413/907
LinJ.06	135662	.	A	C	.	.	ANN=C	missense_variant	MODERATE	LinJ.06.0390	LinJ.06.0390	transcript	LinJ.06.0390:mRNA	protein_coding	2019-01-01	c.2375A>C	p.Glu792Ala	2375/2724	2375/2724	792/907
LinJ.06	136242	.	G	A	.	.	ANN=A	intergenic_region	MODIFIER	LinJ.06.0390-LinJ.06.0400	LinJ.06.0390-LinJ.06.0400	intergenic_region	LinJ.06.0390-LinJ.06.0400	n.136242G>A
LinJ.06	136405	.	C	T	.	.	ANN=T	synonymous_variant	LOW	LinJ.06.0400	LinJ.06.0400	transcript	LinJ.06.0400:mRNA	protein_coding	2019-03-01	c.12C>T	p.Cys4Cys	12/897	12/897	4/298
LinJ.06	136519	.	C	A	.	.	ANN=A	missense_variant	MODERATE	LinJ.06.0400	LinJ.06.0400	transcript	LinJ.06.0400:mRNA	protein_coding	2019-03-01	c.126C>A	p.Asp42Glu	126/897	126/897	42/298
LinJ.06	136579	.	T	C	.	.	ANN=C	synonymous_variant	LOW	LinJ.06.0400	LinJ.06.0400	transcript	LinJ.06.0400:mRNA	protein_coding	2019-03-01	c.186T>C	p.Gly62Gly	186/897	186/897	62/298
LinJ.06	137169	.	G	A	.	.	ANN=A	synonymous_variant	LOW	LinJ.06.0400	LinJ.06.0400	transcript	LinJ.06.0400:mRNA	protein_coding	2019-03-03	c.771G>A	p.Ala257Ala	771/897	771/897	257/298
LinJ.06	137199	.	A	G	.	.	ANN=G	synonymous_variant	LOW	LinJ.06.0400	LinJ.06.0400	transcript	LinJ.06.0400:mRNA	protein_coding	2019-03-03	c.801A>G	p.Leu267Leu	801/897	801/897	267/298
LinJ.06	137553	.	T	C	.	.	ANN=C	intergenic_region	MODIFIER	LinJ.06.0400-LinJ.06.0410	LinJ.06.0400-LinJ.06.0410	intergenic_region	LinJ.06.0400-LinJ.06.0410	n.137553T>C
LinJ.06	140699	.	C	G	.	.	ANN=G	intergenic_region	MODIFIER	LinJ.06.0410-LinJ.06.0420	LinJ.06.0410-LinJ.06.0420	intergenic_region	LinJ.06.0410-LinJ.06.0420	n.140699C>G
LinJ.06	140947	.	G	A	.	.	ANN=A	intergenic_region	MODIFIER	LinJ.06.0410-LinJ.06.0420	LinJ.06.0410-LinJ.06.0420	intergenic_region	LinJ.06.0410-LinJ.06.0420	n.140947G>A
LinJ.06	141247	.	T	C	.	.	ANN=C	intergenic_region	MODIFIER	LinJ.06.0410-LinJ.06.0420	LinJ.06.0410-LinJ.06.0420	intergenic_region	LinJ.06.0410-LinJ.06.0420	n.141247T>C
LinJ.06	162067	.	G	T	.	.	ANN=T	synonymous_variant	LOW	LinJ.06.0480	LinJ.06.0480	transcript	LinJ.06.0480:mRNA	protein_coding	2019-01-01	c.1266G>T	p.Ser422Ser	1266/3831	1266/3831	422/1276
LinJ.06	162505	.	C	A	.	.	ANN=A	synonymous_variant	LOW	LinJ.06.0480	LinJ.06.0480	transcript	LinJ.06.0480:mRNA	protein_coding	2019-01-01	c.1704C>A	p.Ala568Ala	1704/3831	1704/3831	568/1276
LinJ.06	162717	.	C	T	.	.	ANN=T	missense_variant	MODERATE	LinJ.06.0480	LinJ.06.0480	transcript	LinJ.06.0480:mRNA	protein_coding	2019-01-01	c.1916C>T	p.Thr639Ile	1916/3831	1916/3831	639/1276
LinJ.06	162826	.	G	A	.	.	ANN=A	synonymous_variant	LOW	LinJ.06.0480	LinJ.06.0480	transcript	LinJ.06.0480:mRNA	protein_coding	2019-01-01	c.2025G>A	p.Val675Val	2025/3831	2025/3831	675/1276
LinJ.06	193839	.	A	G	.	.	ANN=G	intergenic_region	MODIFIER	LinJ.06.0560-LinJ.06.0570	LinJ.06.0560-LinJ.06.0570	intergenic_region	LinJ.06.0560-LinJ.06.0570	n.193839A>G
LinJ.06	200259	.	C	T	.	.	ANN=T	intergenic_region	MODIFIER	LinJ.06.0570-LinJ.06.0580	LinJ.06.0570-LinJ.06.0580	intergenic_region	LinJ.06.0570-LinJ.06.0580	n.200259C>T
LinJ.06	200290	.	T	C	.	.	ANN=C	intergenic_region	MODIFIER	LinJ.06.0570-LinJ.06.0580	LinJ.06.0570-LinJ.06.0580	intergenic_region	LinJ.06.0570-LinJ.06.0580	n.200290T>C
LinJ.06	200759	.	A	C	.	.	ANN=C	synonymous_variant	LOW	LinJ.06.0580	LinJ.06.0580	transcript	LinJ.06.0580:mRNA	protein_coding	2019-01-01	c.99A>C	p.Arg33Arg	99/807	99/807	33/268
LinJ.06	208723	.	A	G	.	.	ANN=G	missense_variant	MODERATE	LinJ.06.0610	LinJ.06.0610	transcript	LinJ.06.0610:mRNA	protein_coding	2019-01-01	c.2920A>G	p.Ser974Gly	2920/4524	2920/4524	974/1507
LinJ.06	214453	.	C	A	.	.	ANN=A	missense_variant	MODERATE	LinJ.06.0620	LinJ.06.0620	transcript	LinJ.06.0620:mRNA	protein_coding	2019-01-01	c.3254C>A	p.Ala1085Asp	3254/4101	3254/4101	1085/1366
LinJ.06	214454	.	C	A	.	.	ANN=A	synonymous_variant	LOW	LinJ.06.0620	LinJ.06.0620	transcript	LinJ.06.0620:mRNA	protein_coding	2019-01-01	c.3255C>A	p.Ala1085Ala	3255/4101	3255/4101	1085/1366
LinJ.06	214539	.	C	T	.	.	ANN=T	synonymous_variant	LOW	LinJ.06.0620	LinJ.06.0620	transcript	LinJ.06.0620:mRNA	protein_coding	2019-01-01	c.3340C>T	p.Leu1114Leu	3340/4101	3340/4101	1114/1366
LinJ.06	215195	.	G	A	.	.	ANN=A	synonymous_variant	LOW	LinJ.06.0620	LinJ.06.0620	transcript	LinJ.06.0620:mRNA	protein_coding	2019-01-01	c.3996G>A	p.Arg1332Arg	3996/4101	3996/4101	1332/1366
LinJ.06	215359	.	G	A	.	.	ANN=A	intergenic_region	MODIFIER	LinJ.06.0620-LinJ.06.0630	LinJ.06.0620-LinJ.06.0630	intergenic_region	LinJ.06.0620-LinJ.06.0630	n.215359G>A
LinJ.06	215627	.	A	G	.	.	ANN=G	intergenic_region	MODIFIER	LinJ.06.0620-LinJ.06.0630	LinJ.06.0620-LinJ.06.0630	intergenic_region	LinJ.06.0620-LinJ.06.0630	n.215627A>G
LinJ.06	215747	.	C	G	.	.	ANN=G	intergenic_region	MODIFIER	LinJ.06.0620-LinJ.06.0630	LinJ.06.0620-LinJ.06.0630	intergenic_region	LinJ.06.0620-LinJ.06.0630	n.215747C>G
LinJ.06	215758	.	A	G	.	.	ANN=G	intergenic_region	MODIFIER	LinJ.06.0620-LinJ.06.0630	LinJ.06.0620-LinJ.06.0630	intergenic_region	LinJ.06.0620-LinJ.06.0630	n.215758A>G
LinJ.06	215993	.	T	G	.	.	ANN=G	intergenic_region	MODIFIER	LinJ.06.0620-LinJ.06.0630	LinJ.06.0620-LinJ.06.0630	intergenic_region	LinJ.06.0620-LinJ.06.0630	n.215993T>G
LinJ.06	216045	.	G	A	.	.	ANN=A	intergenic_region	MODIFIER	LinJ.06.0620-LinJ.06.0630	LinJ.06.0620-LinJ.06.0630	intergenic_region	LinJ.06.0620-LinJ.06.0630	n.216045G>A
LinJ.06	216052	.	T	G	.	.	ANN=G	intergenic_region	MODIFIER	LinJ.06.0620-LinJ.06.0630	LinJ.06.0620-LinJ.06.0630	intergenic_region	LinJ.06.0620-LinJ.06.0630	n.216052T>G
LinJ.06	216129	.	C	T	.	.	ANN=T	intergenic_region	MODIFIER	LinJ.06.0620-LinJ.06.0630	LinJ.06.0620-LinJ.06.0630	intergenic_region	LinJ.06.0620-LinJ.06.0630	n.216129C>T
LinJ.06	216500	.	G	C	.	.	ANN=C	intergenic_region	MODIFIER	LinJ.06.0620-LinJ.06.0630	LinJ.06.0620-LinJ.06.0630	intergenic_region	LinJ.06.0620-LinJ.06.0630	n.216500G>C
LinJ.06	218796	.	T	C	.	.	ANN=C	intergenic_region	MODIFIER	LinJ.06.0630-LinJ.06.0640	LinJ.06.0630-LinJ.06.0640	intergenic_region	LinJ.06.0630-LinJ.06.0640	n.218796T>C
LinJ.06	218825	.	G	C	.	.	ANN=C	intergenic_region	MODIFIER	LinJ.06.0630-LinJ.06.0640	LinJ.06.0630-LinJ.06.0640	intergenic_region	LinJ.06.0630-LinJ.06.0640	n.218825G>C
LinJ.06	218852	.	T	C	.	.	ANN=C	intergenic_region	MODIFIER	LinJ.06.0630-LinJ.06.0640	LinJ.06.0630-LinJ.06.0640	intergenic_region	LinJ.06.0630-LinJ.06.0640	n.218852T>C
LinJ.06	219032	.	T	G	.	.	ANN=G	intergenic_region	MODIFIER	LinJ.06.0630-LinJ.06.0640	LinJ.06.0630-LinJ.06.0640	intergenic_region	LinJ.06.0630-LinJ.06.0640	n.219032T>G
LinJ.06	219494	.	T	C	.	.	ANN=C	missense_variant	MODERATE	LinJ.06.0640	LinJ.06.0640	transcript	LinJ.06.0640:mRNA	protein_coding	2019-01-01	c.307T>C	p.Ser103Pro	307/3033	307/3033	103/1010
LinJ.06	222124	.	C	T	.	.	ANN=T	synonymous_variant	LOW	LinJ.06.0640	LinJ.06.0640	transcript	LinJ.06.0640:mRNA	protein_coding	2019-01-01	c.2937C>T	p.Val979Val	2937/3033	2937/3033	979/1010
LinJ.06	223710	.	T	C	.	.	ANN=C	intergenic_region	MODIFIER	LinJ.06.0640-LinJ.06.0650	LinJ.06.0640-LinJ.06.0650	intergenic_region	LinJ.06.0640-LinJ.06.0650	n.223710T>C
LinJ.06	225767	.	A	G	.	.	ANN=G	synonymous_variant	LOW	LinJ.06.0650	LinJ.06.0650	transcript	LinJ.06.0650:mRNA	protein_coding	2019-01-01	c.1920A>G	p.Thr640Thr	1920/5730	1920/5730	640/1909
LinJ.06	227505	.	C	A	.	.	ANN=A	missense_variant	MODERATE	LinJ.06.0650	LinJ.06.0650	transcript	LinJ.06.0650:mRNA	protein_coding	2019-01-01	c.3658C>A	p.Gln1220Lys	3658/5730	3658/5730	1220/1909
LinJ.06	227515	.	A	G	.	.	ANN=G	missense_variant	MODERATE	LinJ.06.0650	LinJ.06.0650	transcript	LinJ.06.0650:mRNA	protein_coding	2019-01-01	c.3668A>G	p.Asp1223Gly	3668/5730	3668/5730	1223/1909
LinJ.06	233614	.	T	G,A	.	.	ANN=G	synonymous_variant	LOW	LinJ.06.0660	LinJ.06.0660	transcript	LinJ.06.0660:mRNA	protein_coding	2019-01-01	c.1611T>G	p.Val537Val	1611/9450	1611/9450	537/3149	,A	synonymous_variant	LOW	LinJ.06.0660	LinJ.06.0660	transcript	LinJ.06.0660:mRNA	protein_coding	2019-01-01	c.1611T>A	p.Val537Val	1611/9450	1611/9450	537/3149
LinJ.06	233970	.	A	G	.	.	ANN=G	missense_variant	MODERATE	LinJ.06.0660	LinJ.06.0660	transcript	LinJ.06.0660:mRNA	protein_coding	2019-01-01	c.1967A>G	p.His656Arg	1967/9450	1967/9450	656/3149
LinJ.06	234017	.	T	C	.	.	ANN=C	missense_variant	MODERATE	LinJ.06.0660	LinJ.06.0660	transcript	LinJ.06.0660:mRNA	protein_coding	2019-01-01	c.2014T>C	p.Ser672Pro	2014/9450	2014/9450	672/3149
LinJ.06	234327	.	T	G	.	.	ANN=G	missense_variant	MODERATE	LinJ.06.0660	LinJ.06.0660	transcript	LinJ.06.0660:mRNA	protein_coding	2019-01-01	c.2324T>G	p.Leu775Arg	2324/9450	2324/9450	775/3149
LinJ.06	236209	.	T	C	.	.	ANN=C	synonymous_variant	LOW	LinJ.06.0660	LinJ.06.0660	transcript	LinJ.06.0660:mRNA	protein_coding	2019-01-01	c.4206T>C	p.Ala1402Ala	4206/9450	4206/9450	1402/3149
LinJ.06	238287	.	C	G	.	.	ANN=G	missense_variant	MODERATE	LinJ.06.0660	LinJ.06.0660	transcript	LinJ.06.0660:mRNA	protein_coding	2019-01-01	c.6284C>G	p.Ser2095Trp	6284/9450	6284/9450	2095/3149
LinJ.06	238537	.	C	A	.	.	ANN=A	synonymous_variant	LOW	LinJ.06.0660	LinJ.06.0660	transcript	LinJ.06.0660:mRNA	protein_coding	2019-01-01	c.6534C>A	p.Pro2178Pro	6534/9450	6534/9450	2178/3149
LinJ.06	241523	.	C	T	.	.	ANN=T	intergenic_region	MODIFIER	LinJ.06.0660-LinJ.06.0670	LinJ.06.0660-LinJ.06.0670	intergenic_region	LinJ.06.0660-LinJ.06.0670	n.241523C>T
LinJ.06	242291	.	A	G	.	.	ANN=G	intergenic_region	MODIFIER	LinJ.06.0660-LinJ.06.0670	LinJ.06.0660-LinJ.06.0670	intergenic_region	LinJ.06.0660-LinJ.06.0670	n.242291A>G
LinJ.06	242373	.	T	G	.	.	ANN=G	intergenic_region	MODIFIER	LinJ.06.0660-LinJ.06.0670	LinJ.06.0660-LinJ.06.0670	intergenic_region	LinJ.06.0660-LinJ.06.0670	n.242373T>G
LinJ.06	243655	.	T	C	.	.	ANN=C	missense_variant	MODERATE	LinJ.06.0670	LinJ.06.0670	transcript	LinJ.06.0670:mRNA	protein_coding	2019-01-01	c.674T>C	p.Leu225Ser	674/3024	674/3024	225/1007
LinJ.06	243959	.	C	T	.	.	ANN=T	synonymous_variant	LOW	LinJ.06.0670	LinJ.06.0670	transcript	LinJ.06.0670:mRNA	protein_coding	2019-01-01	c.978C>T	p.Ala326Ala	978/3024	978/3024	326/1007
LinJ.06	243962	.	C	A	.	.	ANN=A	synonymous_variant	LOW	LinJ.06.0670	LinJ.06.0670	transcript	LinJ.06.0670:mRNA	protein_coding	2019-01-01	c.981C>A	p.Gly327Gly	981/3024	981/3024	327/1007
LinJ.06	244002	.	G	A	.	.	ANN=A	missense_variant	MODERATE	LinJ.06.0670	LinJ.06.0670	transcript	LinJ.06.0670:mRNA	protein_coding	2019-01-01	c.1021G>A	p.Asp341Asn	1021/3024	1021/3024	341/1007
LinJ.06	244112	.	T	C	.	.	ANN=C	synonymous_variant	LOW	LinJ.06.0670	LinJ.06.0670	transcript	LinJ.06.0670:mRNA	protein_coding	2019-01-01	c.1131T>C	p.Ser377Ser	1131/3024	1131/3024	377/1007
LinJ.06	244577	.	A	G	.	.	ANN=G	synonymous_variant	LOW	LinJ.06.0670	LinJ.06.0670	transcript	LinJ.06.0670:mRNA	protein_coding	2019-01-01	c.1596A>G	p.Glu532Glu	1596/3024	1596/3024	532/1007
LinJ.06	244598	.	C	T	.	.	ANN=T	synonymous_variant	LOW	LinJ.06.0670	LinJ.06.0670	transcript	LinJ.06.0670:mRNA	protein_coding	2019-01-01	c.1617C>T	p.Asp539Asp	1617/3024	1617/3024	539/1007
LinJ.06	244681	.	C	T	.	.	ANN=T	missense_variant	MODERATE	LinJ.06.0670	LinJ.06.0670	transcript	LinJ.06.0670:mRNA	protein_coding	2019-01-01	c.1700C>T	p.Thr567Met	1700/3024	1700/3024	567/1007
LinJ.06	244736	.	A	G	.	.	ANN=G	synonymous_variant	LOW	LinJ.06.0670	LinJ.06.0670	transcript	LinJ.06.0670:mRNA	protein_coding	2019-01-01	c.1755A>G	p.Ala585Ala	1755/3024	1755/3024	585/1007
LinJ.06	248483	.	A	G	.	.	ANN=G	synonymous_variant	LOW	LinJ.06.0680	LinJ.06.0680	transcript	LinJ.06.0680:mRNA	protein_coding	2019-01-01	c.252A>G	p.Ala84Ala	252/2040	252/2040	84/679
LinJ.06	251050	.	A	C	.	.	ANN=C	intergenic_region	MODIFIER	LinJ.06.0680-LinJ.06.0690	LinJ.06.0680-LinJ.06.0690	intergenic_region	LinJ.06.0680-LinJ.06.0690	n.251050A>C
LinJ.06	253375	.	T	C	.	.	ANN=C	missense_variant	MODERATE	LinJ.06.0690	LinJ.06.0690	transcript	LinJ.06.0690:mRNA	protein_coding	2019-01-01	c.566T>C	p.Val189Ala	566/3912	566/3912	189/1303
LinJ.06	253692	.	A	G	.	.	ANN=G	missense_variant	MODERATE	LinJ.06.0690	LinJ.06.0690	transcript	LinJ.06.0690:mRNA	protein_coding	2019-01-01	c.883A>G	p.Thr295Ala	883/3912	883/3912	295/1303
LinJ.06	257518	.	C	T	.	.	ANN=T	intergenic_region	MODIFIER	LinJ.06.0690-LinJ.06.0700	LinJ.06.0690-LinJ.06.0700	intergenic_region	LinJ.06.0690-LinJ.06.0700	n.257518C>T
LinJ.06	257883	.	T	G	.	.	ANN=G	intergenic_region	MODIFIER	LinJ.06.0690-LinJ.06.0700	LinJ.06.0690-LinJ.06.0700	intergenic_region	LinJ.06.0690-LinJ.06.0700	n.257883T>G
LinJ.06	264343	.	G	A	.	.	ANN=A	missense_variant	MODERATE	LinJ.06.0720	LinJ.06.0720	transcript	LinJ.06.0720:mRNA	protein_coding	2019-01-01	c.2255G>A	p.Gly752Glu	2255/7896	2255/7896	752/2631
LinJ.06	267266	.	C	T	.	.	ANN=T	synonymous_variant	LOW	LinJ.06.0720	LinJ.06.0720	transcript	LinJ.06.0720:mRNA	protein_coding	2019-01-01	c.5178C>T	p.Phe1726Phe	5178/7896	5178/7896	1726/2631
LinJ.06	270200	.	T	G	.	.	ANN=G	intergenic_region	MODIFIER	LinJ.06.0720-LinJ.06.0730	LinJ.06.0720-LinJ.06.0730	intergenic_region	LinJ.06.0720-LinJ.06.0730	n.270200T>G
LinJ.06	271726	.	A	C	.	.	ANN=C	intergenic_region	MODIFIER	LinJ.06.0720-LinJ.06.0730	LinJ.06.0720-LinJ.06.0730	intergenic_region	LinJ.06.0720-LinJ.06.0730	n.271726A>C
LinJ.06	271773	.	A	C	.	.	ANN=C	intergenic_region	MODIFIER	LinJ.06.0720-LinJ.06.0730	LinJ.06.0720-LinJ.06.0730	intergenic_region	LinJ.06.0720-LinJ.06.0730	n.271773A>C
LinJ.06	273802	.	G	A	.	.	ANN=A	missense_variant	MODERATE	LinJ.06.0730	LinJ.06.0730	transcript	LinJ.06.0730:mRNA	protein_coding	2019-01-01	c.1876G>A	p.Ala626Thr	1876/2220	1876/2220	626/739
LinJ.06	274812	.	G	A	.	.	ANN=A	intergenic_region	MODIFIER	LinJ.06.0730-LinJ.06.0740	LinJ.06.0730-LinJ.06.0740	intergenic_region	LinJ.06.0730-LinJ.06.0740	n.274812G>A
LinJ.06	275524	.	G	A	.	.	ANN=A	intergenic_region	MODIFIER	LinJ.06.0730-LinJ.06.0740	LinJ.06.0730-LinJ.06.0740	intergenic_region	LinJ.06.0730-LinJ.06.0740	n.275524G>A
LinJ.06	275714	.	T	G	.	.	ANN=G	intergenic_region	MODIFIER	LinJ.06.0730-LinJ.06.0740	LinJ.06.0730-LinJ.06.0740	intergenic_region	LinJ.06.0730-LinJ.06.0740	n.275714T>G
LinJ.06	276860	.	T	C	.	.	ANN=C	intergenic_region	MODIFIER	LinJ.06.0730-LinJ.06.0740	LinJ.06.0730-LinJ.06.0740	intergenic_region	LinJ.06.0730-LinJ.06.0740	n.276860T>C
LinJ.06	276995	.	T	C	.	.	ANN=C	intergenic_region	MODIFIER	LinJ.06.0730-LinJ.06.0740	LinJ.06.0730-LinJ.06.0740	intergenic_region	LinJ.06.0730-LinJ.06.0740	n.276995T>C
LinJ.06	277253	.	G	C,T	.	.	ANN=C	intergenic_region	MODIFIER	LinJ.06.0730-LinJ.06.0740	LinJ.06.0730-LinJ.06.0740	intergenic_region	LinJ.06.0730-LinJ.06.0740	n.277253G>C	,T	intergenic_region	MODIFIER	LinJ.06.0730-LinJ.06.0740	LinJ.06.0730-LinJ.06.0740	intergenic_region	LinJ.06.0730-LinJ.06.0740	n.277253G>T
LinJ.06	277261	.	C	T	.	.	ANN=T	intergenic_region	MODIFIER	LinJ.06.0730-LinJ.06.0740	LinJ.06.0730-LinJ.06.0740	intergenic_region	LinJ.06.0730-LinJ.06.0740	n.277261C>T
LinJ.06	277361	.	T	C	.	.	ANN=C	intergenic_region	MODIFIER	LinJ.06.0730-LinJ.06.0740	LinJ.06.0730-LinJ.06.0740	intergenic_region	LinJ.06.0730-LinJ.06.0740	n.277361T>C
LinJ.06	278417	.	C	T	.	.	ANN=T	intergenic_region	MODIFIER	LinJ.06.0730-LinJ.06.0740	LinJ.06.0730-LinJ.06.0740	intergenic_region	LinJ.06.0730-LinJ.06.0740	n.278417C>T
LinJ.06	278542	.	T	A	.	.	ANN=A	intergenic_region	MODIFIER	LinJ.06.0730-LinJ.06.0740	LinJ.06.0730-LinJ.06.0740	intergenic_region	LinJ.06.0730-LinJ.06.0740	n.278542T>A
LinJ.06	278831	.	T	C	.	.	ANN=C	intergenic_region	MODIFIER	LinJ.06.0730-LinJ.06.0740	LinJ.06.0730-LinJ.06.0740	intergenic_region	LinJ.06.0730-LinJ.06.0740	n.278831T>C
LinJ.06	278940	.	C	G	.	.	ANN=G	intergenic_region	MODIFIER	LinJ.06.0730-LinJ.06.0740	LinJ.06.0730-LinJ.06.0740	intergenic_region	LinJ.06.0730-LinJ.06.0740	n.278940C>G
LinJ.06	280292	.	G	A	.	.	ANN=A	missense_variant	MODERATE	LinJ.06.0740	LinJ.06.0740	transcript	LinJ.06.0740:mRNA	protein_coding	2019-01-01	c.13G>A	p.Ala5Thr	13/522	13/522	5/173
LinJ.06	280579	.	G	C	.	.	ANN=C	synonymous_variant	LOW	LinJ.06.0740	LinJ.06.0740	transcript	LinJ.06.0740:mRNA	protein_coding	2019-01-01	c.300G>C	p.Leu100Leu	300/522	300/522	100/173
LinJ.06	281164	.	T	C	.	.	ANN=C	intergenic_region	MODIFIER	LinJ.06.0740-LinJ.06.0750	LinJ.06.0740-LinJ.06.0750	intergenic_region	LinJ.06.0740-LinJ.06.0750	n.281164T>C
LinJ.06	282777	.	G	A	.	.	ANN=A	intergenic_region	MODIFIER	LinJ.06.0740-LinJ.06.0750	LinJ.06.0740-LinJ.06.0750	intergenic_region	LinJ.06.0740-LinJ.06.0750	n.282777G>A
LinJ.06	286904	.	C	A	.	.	ANN=A	missense_variant	MODERATE	LinJ.06.0750	LinJ.06.0750	transcript	LinJ.06.0750:mRNA	protein_coding	2019-01-01	c.3066C>A	p.Ser1022Arg	3066/5289	3066/5289	1022/1762
LinJ.06	287348	.	G	A	.	.	ANN=A	synonymous_variant	LOW	LinJ.06.0750	LinJ.06.0750	transcript	LinJ.06.0750:mRNA	protein_coding	2019-01-01	c.3510G>A	p.Ala1170Ala	3510/5289	3510/5289	1170/1762
LinJ.06	287604	.	A	G	.	.	ANN=G	missense_variant	MODERATE	LinJ.06.0750	LinJ.06.0750	transcript	LinJ.06.0750:mRNA	protein_coding	2019-01-01	c.3766A>G	p.Ser1256Gly	3766/5289	3766/5289	1256/1762
LinJ.06	289882	.	A	G	.	.	ANN=G	intergenic_region	MODIFIER	LinJ.06.0750-LinJ.06.0760	LinJ.06.0750-LinJ.06.0760	intergenic_region	LinJ.06.0750-LinJ.06.0760	n.289882A>G
LinJ.06	294841	.	C	T	.	.	ANN=T	synonymous_variant	LOW	LinJ.06.0770	LinJ.06.0770	transcript	LinJ.06.0770:mRNA	protein_coding	2019-01-01	c.1230C>T	p.Phe410Phe	1230/2802	1230/2802	410/933
LinJ.06	295161	.	G	C	.	.	ANN=C	missense_variant	MODERATE	LinJ.06.0770	LinJ.06.0770	transcript	LinJ.06.0770:mRNA	protein_coding	2019-01-01	c.1550G>C	p.Ser517Thr	1550/2802	1550/2802	517/933
LinJ.06	296892	.	C	A	.	.	ANN=A	intergenic_region	MODIFIER	LinJ.06.0770-LinJ.06.0780	LinJ.06.0770-LinJ.06.0780	intergenic_region	LinJ.06.0770-LinJ.06.0780	n.296892C>A
LinJ.06	297122	.	T	C	.	.	ANN=C	intergenic_region	MODIFIER	LinJ.06.0770-LinJ.06.0780	LinJ.06.0770-LinJ.06.0780	intergenic_region	LinJ.06.0770-LinJ.06.0780	n.297122T>C
LinJ.06	297173	.	A	G	.	.	ANN=G	intergenic_region	MODIFIER	LinJ.06.0770-LinJ.06.0780	LinJ.06.0770-LinJ.06.0780	intergenic_region	LinJ.06.0770-LinJ.06.0780	n.297173A>G
LinJ.06	301908	.	G	C	.	.	ANN=C	missense_variant	MODERATE	LinJ.06.0790	LinJ.06.0790	transcript	LinJ.06.0790:mRNA	protein_coding	2019-01-01	c.1496G>C	p.Arg499Thr	1496/3555	1496/3555	499/1184
LinJ.06	302787	.	A	G	.	.	ANN=G	missense_variant	MODERATE	LinJ.06.0790	LinJ.06.0790	transcript	LinJ.06.0790:mRNA	protein_coding	2019-01-01	c.2375A>G	p.Lys792Arg	2375/3555	2375/3555	792/1184
LinJ.06	305075	.	A	G	.	.	ANN=G	intergenic_region	MODIFIER	LinJ.06.0790-LinJ.06.0800	LinJ.06.0790-LinJ.06.0800	intergenic_region	LinJ.06.0790-LinJ.06.0800	n.305075A>G
LinJ.06	305753	.	T	C	.	.	ANN=C	intergenic_region	MODIFIER	LinJ.06.0790-LinJ.06.0800	LinJ.06.0790-LinJ.06.0800	intergenic_region	LinJ.06.0790-LinJ.06.0800	n.305753T>C
LinJ.06	305817	.	C	T	.	.	ANN=T	intergenic_region	MODIFIER	LinJ.06.0790-LinJ.06.0800	LinJ.06.0790-LinJ.06.0800	intergenic_region	LinJ.06.0790-LinJ.06.0800	n.305817C>T
LinJ.06	308056	.	A	G	.	.	ANN=G	synonymous_variant	LOW	LinJ.06.0800	LinJ.06.0800	transcript	LinJ.06.0800:mRNA	protein_coding	2019-01-01	c.42A>G	p.Ser14Ser	42/5982	42/5982	14/1993
LinJ.06	308068	.	T	C	.	.	ANN=C	synonymous_variant	LOW	LinJ.06.0800	LinJ.06.0800	transcript	LinJ.06.0800:mRNA	protein_coding	2019-01-01	c.54T>C	p.Arg18Arg	54/5982	54/5982	18/1993
LinJ.06	308195	.	T	C	.	.	ANN=C	missense_variant	MODERATE	LinJ.06.0800	LinJ.06.0800	transcript	LinJ.06.0800:mRNA	protein_coding	2019-01-01	c.181T>C	p.Phe61Leu	181/5982	181/5982	61/1993
LinJ.06	308945	.	A	C	.	.	ANN=C	missense_variant	MODERATE	LinJ.06.0800	LinJ.06.0800	transcript	LinJ.06.0800:mRNA	protein_coding	2019-01-01	c.931A>C	p.Thr311Pro	931/5982	931/5982	311/1993
LinJ.06	309121	.	G	A	.	.	ANN=A	synonymous_variant	LOW	LinJ.06.0800	LinJ.06.0800	transcript	LinJ.06.0800:mRNA	protein_coding	2019-01-01	c.1107G>A	p.Pro369Pro	1107/5982	1107/5982	369/1993
LinJ.06	309185	.	T	G	.	.	ANN=G	missense_variant	MODERATE	LinJ.06.0800	LinJ.06.0800	transcript	LinJ.06.0800:mRNA	protein_coding	2019-01-01	c.1171T>G	p.Ser391Ala	1171/5982	1171/5982	391/1993
LinJ.06	309241	.	A	C	.	.	ANN=C	synonymous_variant	LOW	LinJ.06.0800	LinJ.06.0800	transcript	LinJ.06.0800:mRNA	protein_coding	2019-01-01	c.1227A>C	p.Pro409Pro	1227/5982	1227/5982	409/1993
LinJ.06	332536	.	A	G	.	.	ANN=G	intergenic_region	MODIFIER	LinJ.06.0810-LinJ.06.0820	LinJ.06.0810-LinJ.06.0820	intergenic_region	LinJ.06.0810-LinJ.06.0820	n.332536A>G
LinJ.06	336313	.	G	C	.	.	ANN=C	synonymous_variant	LOW	LinJ.06.0820	LinJ.06.0820	transcript	LinJ.06.0820:mRNA	protein_coding	2019-01-01	c.3114G>C	p.Gly1038Gly	3114/3225	3114/3225	1038/1074
LinJ.06	336676	.	T	C	.	.	ANN=C	intergenic_region	MODIFIER	LinJ.06.0820-LinJ.06.0830	LinJ.06.0820-LinJ.06.0830	intergenic_region	LinJ.06.0820-LinJ.06.0830	n.336676T>C
LinJ.06	343996	.	C	G	.	.	ANN=G	intergenic_region	MODIFIER	LinJ.06.0830-LinJ.06.0840	LinJ.06.0830-LinJ.06.0840	intergenic_region	LinJ.06.0830-LinJ.06.0840	n.343996C>G
LinJ.06	344278	.	A	G	.	.	ANN=G	intergenic_region	MODIFIER	LinJ.06.0830-LinJ.06.0840	LinJ.06.0830-LinJ.06.0840	intergenic_region	LinJ.06.0830-LinJ.06.0840	n.344278A>G
LinJ.06	408499	.	A	G	.	.	ANN=G	missense_variant	MODERATE	LinJ.06.0970	LinJ.06.0970	transcript	LinJ.06.0970:mRNA	protein_coding	2019-01-01	c.160A>G	p.Thr54Ala	160/1767	160/1767	54/588
LinJ.06	409144	.	C	A	.	.	ANN=A	missense_variant	MODERATE	LinJ.06.0970	LinJ.06.0970	transcript	LinJ.06.0970:mRNA	protein_coding	2019-01-01	c.805C>A	p.Gln269Lys	805/1767	805/1767	269/588
LinJ.06	409287	.	A	G	.	.	ANN=G	synonymous_variant	LOW	LinJ.06.0970	LinJ.06.0970	transcript	LinJ.06.0970:mRNA	protein_coding	2019-01-01	c.948A>G	p.Pro316Pro	948/1767	948/1767	316/588
LinJ.06	409329	.	C	T	.	.	ANN=T	synonymous_variant	LOW	LinJ.06.0970	LinJ.06.0970	transcript	LinJ.06.0970:mRNA	protein_coding	2019-01-01	c.990C>T	p.Thr330Thr	990/1767	990/1767	330/588
LinJ.06	409346	.	C	T	.	.	ANN=T	missense_variant	MODERATE	LinJ.06.0970	LinJ.06.0970	transcript	LinJ.06.0970:mRNA	protein_coding	2019-01-01	c.1007C>T	p.Ala336Val	1007/1767	1007/1767	336/588
LinJ.06	411665	.	T	C	.	.	ANN=C	synonymous_variant	LOW	LinJ.06.0980	LinJ.06.0980	transcript	LinJ.06.0980:mRNA	protein_coding	2019-01-01	c.465T>C	p.Asp155Asp	465/2013	465/2013	155/670
LinJ.06	415447	.	C	T	.	.	ANN=T	intergenic_region	MODIFIER	LinJ.06.0990-LinJ.06.1000	LinJ.06.0990-LinJ.06.1000	intergenic_region	LinJ.06.0990-LinJ.06.1000	n.415447C>T
LinJ.06	416546	.	C	T	.	.	ANN=T	intergenic_region	MODIFIER	LinJ.06.0990-LinJ.06.1000	LinJ.06.0990-LinJ.06.1000	intergenic_region	LinJ.06.0990-LinJ.06.1000	n.416546C>T
LinJ.06	427716	.	T	G	.	.	ANN=G	intergenic_region	MODIFIER	LinJ.06.1010-LinJ.06.1020	LinJ.06.1010-LinJ.06.1020	intergenic_region	LinJ.06.1010-LinJ.06.1020	n.427716T>G
LinJ.06	429169	.	T	C	.	.	ANN=C	synonymous_variant	LOW	LinJ.06.1020	LinJ.06.1020	transcript	LinJ.06.1020:mRNA	protein_coding	2019-01-01	c.1110T>C	p.Val370Val	1110/3648	1110/3648	370/1215
LinJ.06	467637	.	C	T	.	.	ANN=T	intergenic_region	MODIFIER	LinJ.06.1150-LinJ.06.1160	LinJ.06.1150-LinJ.06.1160	intergenic_region	LinJ.06.1150-LinJ.06.1160	n.467637C>T
LinJ.06	468907	.	T	C	.	.	ANN=C	intergenic_region	MODIFIER	LinJ.06.1150-LinJ.06.1160	LinJ.06.1150-LinJ.06.1160	intergenic_region	LinJ.06.1150-LinJ.06.1160	n.468907T>C
LinJ.06	468920	.	C	A	.	.	ANN=A	intergenic_region	MODIFIER	LinJ.06.1150-LinJ.06.1160	LinJ.06.1150-LinJ.06.1160	intergenic_region	LinJ.06.1150-LinJ.06.1160	n.468920C>A
LinJ.06	470261	.	C	G	.	.	ANN=G	intergenic_region	MODIFIER	LinJ.06.1160-LinJ.06.1170	LinJ.06.1160-LinJ.06.1170	intergenic_region	LinJ.06.1160-LinJ.06.1170	n.470261C>G
LinJ.06	472088	.	A	G	.	.	ANN=G	intergenic_region	MODIFIER	LinJ.06.1170-LinJ.06.1180	LinJ.06.1170-LinJ.06.1180	intergenic_region	LinJ.06.1170-LinJ.06.1180	n.472088A>G
LinJ.06	476902	.	T	C	.	.	ANN=C	intergenic_region	MODIFIER	LinJ.06.1190-LinJ.06.1200	LinJ.06.1190-LinJ.06.1200	intergenic_region	LinJ.06.1190-LinJ.06.1200	n.476902T>C
LinJ.06	477798	.	A	C	.	.	ANN=C	synonymous_variant	LOW	LinJ.06.1200	LinJ.06.1200	transcript	LinJ.06.1200:mRNA	protein_coding	2019-01-01	c.675A>C	p.Leu225Leu	675/3282	675/3282	225/1093
LinJ.06	487461	.	G	C	.	.	ANN=C	intergenic_region	MODIFIER	LinJ.06.1240-LinJ.06.1250	LinJ.06.1240-LinJ.06.1250	intergenic_region	LinJ.06.1240-LinJ.06.1250	n.487461G>C
LinJ.06	487463	.	A	G	.	.	ANN=G	intergenic_region	MODIFIER	LinJ.06.1240-LinJ.06.1250	LinJ.06.1240-LinJ.06.1250	intergenic_region	LinJ.06.1240-LinJ.06.1250	n.487463A>G
LinJ.06	487646	.	T	G	.	.	ANN=G	intergenic_region	MODIFIER	LinJ.06.1240-LinJ.06.1250	LinJ.06.1240-LinJ.06.1250	intergenic_region	LinJ.06.1240-LinJ.06.1250	n.487646T>G
LinJ.06	487866	.	C	T	.	.	ANN=T	intergenic_region	MODIFIER	LinJ.06.1240-LinJ.06.1250	LinJ.06.1240-LinJ.06.1250	intergenic_region	LinJ.06.1240-LinJ.06.1250	n.487866C>T
LinJ.06	487880	.	C	T	.	.	ANN=T	intergenic_region	MODIFIER	LinJ.06.1240-LinJ.06.1250	LinJ.06.1240-LinJ.06.1250	intergenic_region	LinJ.06.1240-LinJ.06.1250	n.487880C>T
LinJ.07	2878	.	A	G	.	.	ANN=G	intergenic_region	MODIFIER	LinJ.07.0010	LinJ.07.0010	intergenic_region	LinJ.07.0010	n.2878A>G
LinJ.07	22770	.	T	C	.	.	ANN=C	intergenic_region	MODIFIER	LinJ.07.0060-LinJ.07.0070	LinJ.07.0060-LinJ.07.0070	intergenic_region	LinJ.07.0060-LinJ.07.0070	n.22770T>C
LinJ.07	22806	.	A	T	.	.	ANN=T	intergenic_region	MODIFIER	LinJ.07.0060-LinJ.07.0070	LinJ.07.0060-LinJ.07.0070	intergenic_region	LinJ.07.0060-LinJ.07.0070	n.22806A>T
LinJ.07	22847	.	A	T	.	.	ANN=T	intergenic_region	MODIFIER	LinJ.07.0060-LinJ.07.0070	LinJ.07.0060-LinJ.07.0070	intergenic_region	LinJ.07.0060-LinJ.07.0070	n.22847A>T
LinJ.07	22975	.	T	C	.	.	ANN=C	intergenic_region	MODIFIER	LinJ.07.0060-LinJ.07.0070	LinJ.07.0060-LinJ.07.0070	intergenic_region	LinJ.07.0060-LinJ.07.0070	n.22975T>C
LinJ.07	23007	.	C	G	.	.	ANN=G	intergenic_region	MODIFIER	LinJ.07.0060-LinJ.07.0070	LinJ.07.0060-LinJ.07.0070	intergenic_region	LinJ.07.0060-LinJ.07.0070	n.23007C>G
LinJ.07	23242	.	G	T	.	.	ANN=T	intergenic_region	MODIFIER	LinJ.07.0060-LinJ.07.0070	LinJ.07.0060-LinJ.07.0070	intergenic_region	LinJ.07.0060-LinJ.07.0070	n.23242G>T
LinJ.07	23710	.	T	C	.	.	ANN=C	intergenic_region	MODIFIER	LinJ.07.0060-LinJ.07.0070	LinJ.07.0060-LinJ.07.0070	intergenic_region	LinJ.07.0060-LinJ.07.0070	n.23710T>C
LinJ.07	24083	.	A	G	.	.	ANN=G	intergenic_region	MODIFIER	LinJ.07.0060-LinJ.07.0070	LinJ.07.0060-LinJ.07.0070	intergenic_region	LinJ.07.0060-LinJ.07.0070	n.24083A>G
LinJ.07	24195	.	G	A	.	.	ANN=A	intergenic_region	MODIFIER	LinJ.07.0060-LinJ.07.0070	LinJ.07.0060-LinJ.07.0070	intergenic_region	LinJ.07.0060-LinJ.07.0070	n.24195G>A
LinJ.07	24320	.	T	C	.	.	ANN=C	intergenic_region	MODIFIER	LinJ.07.0060-LinJ.07.0070	LinJ.07.0060-LinJ.07.0070	intergenic_region	LinJ.07.0060-LinJ.07.0070	n.24320T>C
LinJ.07	24521	.	T	C	.	.	ANN=C	intergenic_region	MODIFIER	LinJ.07.0060-LinJ.07.0070	LinJ.07.0060-LinJ.07.0070	intergenic_region	LinJ.07.0060-LinJ.07.0070	n.24521T>C
LinJ.07	24535	.	T	C	.	.	ANN=C	intergenic_region	MODIFIER	LinJ.07.0060-LinJ.07.0070	LinJ.07.0060-LinJ.07.0070	intergenic_region	LinJ.07.0060-LinJ.07.0070	n.24535T>C
LinJ.07	24625	.	T	C	.	.	ANN=C	intergenic_region	MODIFIER	LinJ.07.0060-LinJ.07.0070	LinJ.07.0060-LinJ.07.0070	intergenic_region	LinJ.07.0060-LinJ.07.0070	n.24625T>C
LinJ.07	24661	.	C	A	.	.	ANN=A	intergenic_region	MODIFIER	LinJ.07.0060-LinJ.07.0070	LinJ.07.0060-LinJ.07.0070	intergenic_region	LinJ.07.0060-LinJ.07.0070	n.24661C>A
LinJ.07	24905	.	T	C	.	.	ANN=C	intergenic_region	MODIFIER	LinJ.07.0060-LinJ.07.0070	LinJ.07.0060-LinJ.07.0070	intergenic_region	LinJ.07.0060-LinJ.07.0070	n.24905T>C
LinJ.07	25000	.	C	T	.	.	ANN=T	intergenic_region	MODIFIER	LinJ.07.0060-LinJ.07.0070	LinJ.07.0060-LinJ.07.0070	intergenic_region	LinJ.07.0060-LinJ.07.0070	n.25000C>T
LinJ.07	25045	.	A	G	.	.	ANN=G	intergenic_region	MODIFIER	LinJ.07.0060-LinJ.07.0070	LinJ.07.0060-LinJ.07.0070	intergenic_region	LinJ.07.0060-LinJ.07.0070	n.25045A>G
LinJ.07	25061	.	C	T	.	.	ANN=T	intergenic_region	MODIFIER	LinJ.07.0060-LinJ.07.0070	LinJ.07.0060-LinJ.07.0070	intergenic_region	LinJ.07.0060-LinJ.07.0070	n.25061C>T
LinJ.07	25140	.	A	G	.	.	ANN=G	intergenic_region	MODIFIER	LinJ.07.0060-LinJ.07.0070	LinJ.07.0060-LinJ.07.0070	intergenic_region	LinJ.07.0060-LinJ.07.0070	n.25140A>G
LinJ.07	25141	.	T	C	.	.	ANN=C	intergenic_region	MODIFIER	LinJ.07.0060-LinJ.07.0070	LinJ.07.0060-LinJ.07.0070	intergenic_region	LinJ.07.0060-LinJ.07.0070	n.25141T>C
LinJ.07	25159	.	A	G	.	.	ANN=G	intergenic_region	MODIFIER	LinJ.07.0060-LinJ.07.0070	LinJ.07.0060-LinJ.07.0070	intergenic_region	LinJ.07.0060-LinJ.07.0070	n.25159A>G
LinJ.07	25281	.	T	C	.	.	ANN=C	intergenic_region	MODIFIER	LinJ.07.0060-LinJ.07.0070	LinJ.07.0060-LinJ.07.0070	intergenic_region	LinJ.07.0060-LinJ.07.0070	n.25281T>C
LinJ.07	25436	.	T	C	.	.	ANN=C	intergenic_region	MODIFIER	LinJ.07.0060-LinJ.07.0070	LinJ.07.0060-LinJ.07.0070	intergenic_region	LinJ.07.0060-LinJ.07.0070	n.25436T>C
LinJ.07	25767	.	T	C	.	.	ANN=C	intergenic_region	MODIFIER	LinJ.07.0060-LinJ.07.0070	LinJ.07.0060-LinJ.07.0070	intergenic_region	LinJ.07.0060-LinJ.07.0070	n.25767T>C
LinJ.07	25822	.	C	A	.	.	ANN=A	intergenic_region	MODIFIER	LinJ.07.0060-LinJ.07.0070	LinJ.07.0060-LinJ.07.0070	intergenic_region	LinJ.07.0060-LinJ.07.0070	n.25822C>A
LinJ.07	26133	.	C	T	.	.	ANN=T	intergenic_region	MODIFIER	LinJ.07.0060-LinJ.07.0070	LinJ.07.0060-LinJ.07.0070	intergenic_region	LinJ.07.0060-LinJ.07.0070	n.26133C>T
LinJ.07	26192	.	G	T	.	.	ANN=T	intergenic_region	MODIFIER	LinJ.07.0060-LinJ.07.0070	LinJ.07.0060-LinJ.07.0070	intergenic_region	LinJ.07.0060-LinJ.07.0070	n.26192G>T
LinJ.07	26244	.	T	C	.	.	ANN=C	intergenic_region	MODIFIER	LinJ.07.0060-LinJ.07.0070	LinJ.07.0060-LinJ.07.0070	intergenic_region	LinJ.07.0060-LinJ.07.0070	n.26244T>C
LinJ.07	26276	.	C	A	.	.	ANN=A	synonymous_variant	LOW	LinJ.07.0070	LinJ.07.0070	transcript	LinJ.07.0070:mRNA	protein_coding	2019-01-01	c.28C>A	p.Arg10Arg	28/1833	28/1833	10/610
LinJ.07	26600	.	C	T	.	.	ANN=T	missense_variant	MODERATE	LinJ.07.0070	LinJ.07.0070	transcript	LinJ.07.0070:mRNA	protein_coding	2019-01-01	c.352C>T	p.Leu118Phe	352/1833	352/1833	118/610
LinJ.07	26757	.	T	C	.	.	ANN=C	missense_variant	MODERATE	LinJ.07.0070	LinJ.07.0070	transcript	LinJ.07.0070:mRNA	protein_coding	2019-01-01	c.509T>C	p.Val170Ala	509/1833	509/1833	170/610
LinJ.07	26852	.	T	C	.	.	ANN=C	missense_variant	MODERATE	LinJ.07.0070	LinJ.07.0070	transcript	LinJ.07.0070:mRNA	protein_coding	2019-01-01	c.604T>C	p.Ser202Pro	604/1833	604/1833	202/610
LinJ.07	26885	.	C	A	.	.	ANN=A	missense_variant	MODERATE	LinJ.07.0070	LinJ.07.0070	transcript	LinJ.07.0070:mRNA	protein_coding	2019-01-01	c.637C>A	p.Leu213Ile	637/1833	637/1833	213/610
LinJ.07	27037	.	T	C	.	.	ANN=C	synonymous_variant	LOW	LinJ.07.0070	LinJ.07.0070	transcript	LinJ.07.0070:mRNA	protein_coding	2019-01-01	c.789T>C	p.His263His	789/1833	789/1833	263/610
LinJ.07	27145	.	T	C	.	.	ANN=C	synonymous_variant	LOW	LinJ.07.0070	LinJ.07.0070	transcript	LinJ.07.0070:mRNA	protein_coding	2019-01-01	c.897T>C	p.Asp299Asp	897/1833	897/1833	299/610
LinJ.07	28258	.	T	C	.	.	ANN=C	intergenic_region	MODIFIER	LinJ.07.0070-LinJ.07.0080	LinJ.07.0070-LinJ.07.0080	intergenic_region	LinJ.07.0070-LinJ.07.0080	n.28258T>C
LinJ.07	28366	.	A	G	.	.	ANN=G	intergenic_region	MODIFIER	LinJ.07.0070-LinJ.07.0080	LinJ.07.0070-LinJ.07.0080	intergenic_region	LinJ.07.0070-LinJ.07.0080	n.28366A>G
LinJ.07	28441	.	C	G	.	.	ANN=G	intergenic_region	MODIFIER	LinJ.07.0070-LinJ.07.0080	LinJ.07.0070-LinJ.07.0080	intergenic_region	LinJ.07.0070-LinJ.07.0080	n.28441C>G
LinJ.07	28452	.	C	T	.	.	ANN=T	intergenic_region	MODIFIER	LinJ.07.0070-LinJ.07.0080	LinJ.07.0070-LinJ.07.0080	intergenic_region	LinJ.07.0070-LinJ.07.0080	n.28452C>T
LinJ.07	29497	.	T	C	.	.	ANN=C	synonymous_variant	LOW	LinJ.07.0080	LinJ.07.0080	transcript	LinJ.07.0080:mRNA	protein_coding	2019-01-01	c.453T>C	p.Arg151Arg	453/2787	453/2787	151/928
LinJ.07	31273	.	T	C	.	.	ANN=C	synonymous_variant	LOW	LinJ.07.0080	LinJ.07.0080	transcript	LinJ.07.0080:mRNA	protein_coding	2019-01-01	c.2229T>C	p.Asp743Asp	2229/2787	2229/2787	743/928
LinJ.07	31619	.	C	T	.	.	ANN=T	synonymous_variant	LOW	LinJ.07.0080	LinJ.07.0080	transcript	LinJ.07.0080:mRNA	protein_coding	2019-01-01	c.2575C>T	p.Leu859Leu	2575/2787	2575/2787	859/928
LinJ.07	32220	.	A	G	.	.	ANN=G	intergenic_region	MODIFIER	LinJ.07.0080-LinJ.07.0090	LinJ.07.0080-LinJ.07.0090	intergenic_region	LinJ.07.0080-LinJ.07.0090	n.32220A>G
LinJ.07	32399	.	C	T	.	.	ANN=T	synonymous_variant	LOW	LinJ.07.0090	LinJ.07.0090	transcript	LinJ.07.0090:mRNA	protein_coding	2019-01-01	c.168C>T	p.Phe56Phe	168/11271	168/11271	56/3756
LinJ.07	32410	.	C	T	.	.	ANN=T	missense_variant	MODERATE	LinJ.07.0090	LinJ.07.0090	transcript	LinJ.07.0090:mRNA	protein_coding	2019-01-01	c.179C>T	p.Ala60Val	179/11271	179/11271	60/3756
LinJ.07	32441	.	C	T	.	.	ANN=T	synonymous_variant	LOW	LinJ.07.0090	LinJ.07.0090	transcript	LinJ.07.0090:mRNA	protein_coding	2019-01-01	c.210C>T	p.Ala70Ala	210/11271	210/11271	70/3756
LinJ.07	32711	.	T	G	.	.	ANN=G	missense_variant	MODERATE	LinJ.07.0090	LinJ.07.0090	transcript	LinJ.07.0090:mRNA	protein_coding	2019-01-01	c.480T>G	p.His160Gln	480/11271	480/11271	160/3756
LinJ.07	32972	.	A	G	.	.	ANN=G	synonymous_variant	LOW	LinJ.07.0090	LinJ.07.0090	transcript	LinJ.07.0090:mRNA	protein_coding	2019-01-01	c.741A>G	p.Arg247Arg	741/11271	741/11271	247/3756
LinJ.07	33005	.	G	A	.	.	ANN=A	synonymous_variant	LOW	LinJ.07.0090	LinJ.07.0090	transcript	LinJ.07.0090:mRNA	protein_coding	2019-01-01	c.774G>A	p.Ala258Ala	774/11271	774/11271	258/3756
LinJ.07	33244	.	C	G	.	.	ANN=G	missense_variant	MODERATE	LinJ.07.0090	LinJ.07.0090	transcript	LinJ.07.0090:mRNA	protein_coding	2019-01-01	c.1013C>G	p.Pro338Arg	1013/11271	1013/11271	338/3756
LinJ.07	33358	.	A	G	.	.	ANN=G	missense_variant	MODERATE	LinJ.07.0090	LinJ.07.0090	transcript	LinJ.07.0090:mRNA	protein_coding	2019-01-01	c.1127A>G	p.Lys376Arg	1127/11271	1127/11271	376/3756
LinJ.07	33441	.	G	C	.	.	ANN=C	missense_variant	MODERATE	LinJ.07.0090	LinJ.07.0090	transcript	LinJ.07.0090:mRNA	protein_coding	2019-01-01	c.1210G>C	p.Val404Leu	1210/11271	1210/11271	404/3756
LinJ.07	33451	.	G	A	.	.	ANN=A	missense_variant	MODERATE	LinJ.07.0090	LinJ.07.0090	transcript	LinJ.07.0090:mRNA	protein_coding	2019-01-01	c.1220G>A	p.Gly407Asp	1220/11271	1220/11271	407/3756
LinJ.07	33818	.	T	C	.	.	ANN=C	synonymous_variant	LOW	LinJ.07.0090	LinJ.07.0090	transcript	LinJ.07.0090:mRNA	protein_coding	2019-01-01	c.1587T>C	p.His529His	1587/11271	1587/11271	529/3756
LinJ.07	33824	.	A	G	.	.	ANN=G	synonymous_variant	LOW	LinJ.07.0090	LinJ.07.0090	transcript	LinJ.07.0090:mRNA	protein_coding	2019-01-01	c.1593A>G	p.Thr531Thr	1593/11271	1593/11271	531/3756
LinJ.07	34790	.	C	T	.	.	ANN=T	synonymous_variant	LOW	LinJ.07.0090	LinJ.07.0090	transcript	LinJ.07.0090:mRNA	protein_coding	2019-01-01	c.2559C>T	p.Thr853Thr	2559/11271	2559/11271	853/3756
LinJ.07	35249	.	C	T	.	.	ANN=T	synonymous_variant	LOW	LinJ.07.0090	LinJ.07.0090	transcript	LinJ.07.0090:mRNA	protein_coding	2019-01-01	c.3018C>T	p.Gly1006Gly	3018/11271	3018/11271	1006/3756
LinJ.07	35365	.	T	G	.	.	ANN=G	missense_variant	MODERATE	LinJ.07.0090	LinJ.07.0090	transcript	LinJ.07.0090:mRNA	protein_coding	2019-01-01	c.3134T>G	p.Leu1045Arg	3134/11271	3134/11271	1045/3756
LinJ.07	35862	.	C	A	.	.	ANN=A	missense_variant	MODERATE	LinJ.07.0090	LinJ.07.0090	transcript	LinJ.07.0090:mRNA	protein_coding	2019-01-01	c.3631C>A	p.Leu1211Met	3631/11271	3631/11271	1211/3756
LinJ.07	36040	.	A	G	.	.	ANN=G	missense_variant	MODERATE	LinJ.07.0090	LinJ.07.0090	transcript	LinJ.07.0090:mRNA	protein_coding	2019-01-01	c.3809A>G	p.Asp1270Gly	3809/11271	3809/11271	1270/3756
LinJ.07	36736	.	T	C	.	.	ANN=C	missense_variant	MODERATE	LinJ.07.0090	LinJ.07.0090	transcript	LinJ.07.0090:mRNA	protein_coding	2019-01-01	c.4505T>C	p.Val1502Ala	4505/11271	4505/11271	1502/3756
LinJ.07	36959	.	T	C	.	.	ANN=C	synonymous_variant	LOW	LinJ.07.0090	LinJ.07.0090	transcript	LinJ.07.0090:mRNA	protein_coding	2019-01-01	c.4728T>C	p.Ser1576Ser	4728/11271	4728/11271	1576/3756
LinJ.07	37167	.	C	T	.	.	ANN=T	missense_variant	MODERATE	LinJ.07.0090	LinJ.07.0090	transcript	LinJ.07.0090:mRNA	protein_coding	2019-01-01	c.4936C>T	p.Arg1646Cys	4936/11271	4936/11271	1646/3756
LinJ.07	37407	.	C	G	.	.	ANN=G	missense_variant	MODERATE	LinJ.07.0090	LinJ.07.0090	transcript	LinJ.07.0090:mRNA	protein_coding	2019-01-01	c.5176C>G	p.Leu1726Val	5176/11271	5176/11271	1726/3756
LinJ.07	37531	.	T	G	.	.	ANN=G	missense_variant	MODERATE	LinJ.07.0090	LinJ.07.0090	transcript	LinJ.07.0090:mRNA	protein_coding	2019-01-01	c.5300T>G	p.Leu1767Arg	5300/11271	5300/11271	1767/3756
LinJ.07	37747	.	T	C	.	.	ANN=C	missense_variant	MODERATE	LinJ.07.0090	LinJ.07.0090	transcript	LinJ.07.0090:mRNA	protein_coding	2019-01-01	c.5516T>C	p.Ile1839Thr	5516/11271	5516/11271	1839/3756
LinJ.07	38033	.	C	T	.	.	ANN=T	synonymous_variant	LOW	LinJ.07.0090	LinJ.07.0090	transcript	LinJ.07.0090:mRNA	protein_coding	2019-01-01	c.5802C>T	p.Ser1934Ser	5802/11271	5802/11271	1934/3756
LinJ.07	38204	.	G	C	.	.	ANN=C	synonymous_variant	LOW	LinJ.07.0090	LinJ.07.0090	transcript	LinJ.07.0090:mRNA	protein_coding	2019-01-01	c.5973G>C	p.Thr1991Thr	5973/11271	5973/11271	1991/3756
LinJ.07	38643	.	G	A	.	.	ANN=A	missense_variant	MODERATE	LinJ.07.0090	LinJ.07.0090	transcript	LinJ.07.0090:mRNA	protein_coding	2019-01-01	c.6412G>A	p.Ala2138Thr	6412/11271	6412/11271	2138/3756
LinJ.07	39215	.	G	A	.	.	ANN=A	synonymous_variant	LOW	LinJ.07.0090	LinJ.07.0090	transcript	LinJ.07.0090:mRNA	protein_coding	2019-01-01	c.6984G>A	p.Ala2328Ala	6984/11271	6984/11271	2328/3756
LinJ.07	39275	.	G	A	.	.	ANN=A	synonymous_variant	LOW	LinJ.07.0090	LinJ.07.0090	transcript	LinJ.07.0090:mRNA	protein_coding	2019-01-01	c.7044G>A	p.Leu2348Leu	7044/11271	7044/11271	2348/3756
LinJ.07	39501	.	G	A	.	.	ANN=A	missense_variant	MODERATE	LinJ.07.0090	LinJ.07.0090	transcript	LinJ.07.0090:mRNA	protein_coding	2019-01-01	c.7270G>A	p.Gly2424Arg	7270/11271	7270/11271	2424/3756
LinJ.07	39538	.	C	T	.	.	ANN=T	missense_variant	MODERATE	LinJ.07.0090	LinJ.07.0090	transcript	LinJ.07.0090:mRNA	protein_coding	2019-01-01	c.7307C>T	p.Thr2436Met	7307/11271	7307/11271	2436/3756
LinJ.07	40005	.	A	G	.	.	ANN=G	missense_variant	MODERATE	LinJ.07.0090	LinJ.07.0090	transcript	LinJ.07.0090:mRNA	protein_coding	2019-01-01	c.7774A>G	p.Asn2592Asp	7774/11271	7774/11271	2592/3756
LinJ.07	40404	.	G	A	.	.	ANN=A	missense_variant	MODERATE	LinJ.07.0090	LinJ.07.0090	transcript	LinJ.07.0090:mRNA	protein_coding	2019-01-01	c.8173G>A	p.Ala2725Thr	8173/11271	8173/11271	2725/3756
LinJ.07	40441	.	G	A	.	.	ANN=A	missense_variant	MODERATE	LinJ.07.0090	LinJ.07.0090	transcript	LinJ.07.0090:mRNA	protein_coding	2019-01-01	c.8210G>A	p.Ser2737Asn	8210/11271	8210/11271	2737/3756
LinJ.07	40522	.	G	A	.	.	ANN=A	missense_variant	MODERATE	LinJ.07.0090	LinJ.07.0090	transcript	LinJ.07.0090:mRNA	protein_coding	2019-01-01	c.8291G>A	p.Arg2764His	8291/11271	8291/11271	2764/3756
LinJ.07	40556	.	C	T	.	.	ANN=T	synonymous_variant	LOW	LinJ.07.0090	LinJ.07.0090	transcript	LinJ.07.0090:mRNA	protein_coding	2019-01-01	c.8325C>T	p.Leu2775Leu	8325/11271	8325/11271	2775/3756
LinJ.07	40571	.	T	C	.	.	ANN=C	synonymous_variant	LOW	LinJ.07.0090	LinJ.07.0090	transcript	LinJ.07.0090:mRNA	protein_coding	2019-01-01	c.8340T>C	p.Ala2780Ala	8340/11271	8340/11271	2780/3756
LinJ.07	40650	.	A	G	.	.	ANN=G	missense_variant	MODERATE	LinJ.07.0090	LinJ.07.0090	transcript	LinJ.07.0090:mRNA	protein_coding	2019-01-01	c.8419A>G	p.Thr2807Ala	8419/11271	8419/11271	2807/3756
LinJ.07	40844	.	A	G	.	.	ANN=G	synonymous_variant	LOW	LinJ.07.0090	LinJ.07.0090	transcript	LinJ.07.0090:mRNA	protein_coding	2019-01-01	c.8613A>G	p.Thr2871Thr	8613/11271	8613/11271	2871/3756
LinJ.07	40895	.	G	T	.	.	ANN=T	missense_variant	MODERATE	LinJ.07.0090	LinJ.07.0090	transcript	LinJ.07.0090:mRNA	protein_coding	2019-01-01	c.8664G>T	p.Gln2888His	8664/11271	8664/11271	2888/3756
LinJ.07	41255	.	A	G	.	.	ANN=G	synonymous_variant	LOW	LinJ.07.0090	LinJ.07.0090	transcript	LinJ.07.0090:mRNA	protein_coding	2019-01-01	c.9024A>G	p.Leu3008Leu	9024/11271	9024/11271	3008/3756
LinJ.07	41301	.	T	C	.	.	ANN=C	missense_variant	MODERATE	LinJ.07.0090	LinJ.07.0090	transcript	LinJ.07.0090:mRNA	protein_coding	2019-01-01	c.9070T>C	p.Phe3024Leu	9070/11271	9070/11271	3024/3756
LinJ.07	41453	.	A	G	.	.	ANN=G	synonymous_variant	LOW	LinJ.07.0090	LinJ.07.0090	transcript	LinJ.07.0090:mRNA	protein_coding	2019-01-01	c.9222A>G	p.Pro3074Pro	9222/11271	9222/11271	3074/3756
LinJ.07	43129	.	T	C	.	.	ANN=C	missense_variant	MODERATE	LinJ.07.0090	LinJ.07.0090	transcript	LinJ.07.0090:mRNA	protein_coding	2019-01-01	c.10898T>C	p.Val3633Ala	10898/11271	10898/11271	3633/3756
LinJ.07	48825	.	C	G	.	.	ANN=G	intergenic_region	MODIFIER	LinJ.07.0100-LinJ.07.0110	LinJ.07.0100-LinJ.07.0110	intergenic_region	LinJ.07.0100-LinJ.07.0110	n.48825C>G
LinJ.07	49275	.	C	T	.	.	ANN=T	intergenic_region	MODIFIER	LinJ.07.0100-LinJ.07.0110	LinJ.07.0100-LinJ.07.0110	intergenic_region	LinJ.07.0100-LinJ.07.0110	n.49275C>T
LinJ.07	50109	.	A	G	.	.	ANN=G	intergenic_region	MODIFIER	LinJ.07.0100-LinJ.07.0110	LinJ.07.0100-LinJ.07.0110	intergenic_region	LinJ.07.0100-LinJ.07.0110	n.50109A>G
LinJ.07	50815	.	A	G	.	.	ANN=G	intergenic_region	MODIFIER	LinJ.07.0100-LinJ.07.0110	LinJ.07.0100-LinJ.07.0110	intergenic_region	LinJ.07.0100-LinJ.07.0110	n.50815A>G
LinJ.07	50987	.	C	G,T	.	.	ANN=G	intergenic_region	MODIFIER	LinJ.07.0100-LinJ.07.0110	LinJ.07.0100-LinJ.07.0110	intergenic_region	LinJ.07.0100-LinJ.07.0110	n.50987C>G	,T	intergenic_region	MODIFIER	LinJ.07.0100-LinJ.07.0110	LinJ.07.0100-LinJ.07.0110	intergenic_region	LinJ.07.0100-LinJ.07.0110	n.50987C>T
LinJ.07	52299	.	T	G	.	.	ANN=G	intergenic_region	MODIFIER	LinJ.07.0100-LinJ.07.0110	LinJ.07.0100-LinJ.07.0110	intergenic_region	LinJ.07.0100-LinJ.07.0110	n.52299T>G
LinJ.07	52337	.	T	G	.	.	ANN=G	intergenic_region	MODIFIER	LinJ.07.0100-LinJ.07.0110	LinJ.07.0100-LinJ.07.0110	intergenic_region	LinJ.07.0100-LinJ.07.0110	n.52337T>G
LinJ.07	52642	.	G	A	.	.	ANN=A	intergenic_region	MODIFIER	LinJ.07.0100-LinJ.07.0110	LinJ.07.0100-LinJ.07.0110	intergenic_region	LinJ.07.0100-LinJ.07.0110	n.52642G>A
LinJ.07	52644	.	A	C	.	.	ANN=C	intergenic_region	MODIFIER	LinJ.07.0100-LinJ.07.0110	LinJ.07.0100-LinJ.07.0110	intergenic_region	LinJ.07.0100-LinJ.07.0110	n.52644A>C
LinJ.07	54045	.	T	G	.	.	ANN=G	intergenic_region	MODIFIER	LinJ.07.0110-LinJ.07.0120	LinJ.07.0110-LinJ.07.0120	intergenic_region	LinJ.07.0110-LinJ.07.0120	n.54045T>G
LinJ.07	54126	.	A	C	.	.	ANN=C	intergenic_region	MODIFIER	LinJ.07.0110-LinJ.07.0120	LinJ.07.0110-LinJ.07.0120	intergenic_region	LinJ.07.0110-LinJ.07.0120	n.54126A>C
LinJ.07	55113	.	G	A	.	.	ANN=A	missense_variant	MODERATE	LinJ.07.0120	LinJ.07.0120	transcript	LinJ.07.0120:mRNA	protein_coding	2019-01-01	c.865G>A	p.Val289Met	865/1971	865/1971	289/656
LinJ.07	55187	.	C	A	.	.	ANN=A	synonymous_variant	LOW	LinJ.07.0120	LinJ.07.0120	transcript	LinJ.07.0120:mRNA	protein_coding	2019-01-01	c.939C>A	p.Pro313Pro	939/1971	939/1971	313/656
LinJ.07	56230	.	T	A	.	.	ANN=A	intergenic_region	MODIFIER	LinJ.07.0120-LinJ.07.0130	LinJ.07.0120-LinJ.07.0130	intergenic_region	LinJ.07.0120-LinJ.07.0130	n.56230T>A
LinJ.07	56705	.	G	A	.	.	ANN=A	intergenic_region	MODIFIER	LinJ.07.0120-LinJ.07.0130	LinJ.07.0120-LinJ.07.0130	intergenic_region	LinJ.07.0120-LinJ.07.0130	n.56705G>A
LinJ.07	56763	.	G	A	.	.	ANN=A	intergenic_region	MODIFIER	LinJ.07.0120-LinJ.07.0130	LinJ.07.0120-LinJ.07.0130	intergenic_region	LinJ.07.0120-LinJ.07.0130	n.56763G>A
LinJ.07	56877	.	T	C	.	.	ANN=C	intergenic_region	MODIFIER	LinJ.07.0120-LinJ.07.0130	LinJ.07.0120-LinJ.07.0130	intergenic_region	LinJ.07.0120-LinJ.07.0130	n.56877T>C
LinJ.07	56930	.	T	A	.	.	ANN=A	intergenic_region	MODIFIER	LinJ.07.0120-LinJ.07.0130	LinJ.07.0120-LinJ.07.0130	intergenic_region	LinJ.07.0120-LinJ.07.0130	n.56930T>A
LinJ.07	60197	.	G	T	.	.	ANN=T	intergenic_region	MODIFIER	LinJ.07.0130-LinJ.07.0140	LinJ.07.0130-LinJ.07.0140	intergenic_region	LinJ.07.0130-LinJ.07.0140	n.60197G>T
LinJ.07	61340	.	A	G	.	.	ANN=G	intergenic_region	MODIFIER	LinJ.07.0130-LinJ.07.0140	LinJ.07.0130-LinJ.07.0140	intergenic_region	LinJ.07.0130-LinJ.07.0140	n.61340A>G
LinJ.07	63981	.	G	A	.	.	ANN=A	synonymous_variant	LOW	LinJ.07.0140	LinJ.07.0140	transcript	LinJ.07.0140:mRNA	protein_coding	2019-01-01	c.1731G>A	p.Ser577Ser	1731/2343	1731/2343	577/780
LinJ.07	64734	.	A	G	.	.	ANN=G	intergenic_region	MODIFIER	LinJ.07.0140-LinJ.07.0150	LinJ.07.0140-LinJ.07.0150	intergenic_region	LinJ.07.0140-LinJ.07.0150	n.64734A>G
LinJ.07	65763	.	A	C	.	.	ANN=C	missense_variant	MODERATE	LinJ.07.0150	LinJ.07.0150	transcript	LinJ.07.0150:mRNA	protein_coding	2019-01-01	c.661A>C	p.Ser221Arg	661/1560	661/1560	221/519
LinJ.07	66889	.	T	C	.	.	ANN=C	intergenic_region	MODIFIER	LinJ.07.0150-LinJ.07.0160	LinJ.07.0150-LinJ.07.0160	intergenic_region	LinJ.07.0150-LinJ.07.0160	n.66889T>C
LinJ.07	69485	.	A	G	.	.	ANN=G	intergenic_region	MODIFIER	LinJ.07.0170-LinJ.07.0180	LinJ.07.0170-LinJ.07.0180	intergenic_region	LinJ.07.0170-LinJ.07.0180	n.69485A>G
LinJ.07	73408	.	A	T	.	.	ANN=T	intergenic_region	MODIFIER	LinJ.07.0190-LinJ.07.0200	LinJ.07.0190-LinJ.07.0200	intergenic_region	LinJ.07.0190-LinJ.07.0200	n.73408A>T
LinJ.07	73475	.	C	T	.	.	ANN=T	intergenic_region	MODIFIER	LinJ.07.0190-LinJ.07.0200	LinJ.07.0190-LinJ.07.0200	intergenic_region	LinJ.07.0190-LinJ.07.0200	n.73475C>T
LinJ.07	73537	.	A	C	.	.	ANN=C	intergenic_region	MODIFIER	LinJ.07.0190-LinJ.07.0200	LinJ.07.0190-LinJ.07.0200	intergenic_region	LinJ.07.0190-LinJ.07.0200	n.73537A>C
LinJ.07	75115	.	G	A	.	.	ANN=A	synonymous_variant	LOW	LinJ.07.0200	LinJ.07.0200	transcript	LinJ.07.0200:mRNA	protein_coding	2019-01-01	c.1068G>A	p.Glu356Glu	1068/1539	1068/1539	356/512
LinJ.07	75614	.	C	G	.	.	ANN=G	intergenic_region	MODIFIER	LinJ.07.0200-LinJ.07.0210	LinJ.07.0200-LinJ.07.0210	intergenic_region	LinJ.07.0200-LinJ.07.0210	n.75614C>G
LinJ.07	75618	.	T	C	.	.	ANN=C	intergenic_region	MODIFIER	LinJ.07.0200-LinJ.07.0210	LinJ.07.0200-LinJ.07.0210	intergenic_region	LinJ.07.0200-LinJ.07.0210	n.75618T>C
LinJ.07	75691	.	G	A	.	.	ANN=A	intergenic_region	MODIFIER	LinJ.07.0200-LinJ.07.0210	LinJ.07.0200-LinJ.07.0210	intergenic_region	LinJ.07.0200-LinJ.07.0210	n.75691G>A
LinJ.07	75793	.	T	C	.	.	ANN=C	intergenic_region	MODIFIER	LinJ.07.0200-LinJ.07.0210	LinJ.07.0200-LinJ.07.0210	intergenic_region	LinJ.07.0200-LinJ.07.0210	n.75793T>C
LinJ.07	75797	.	A	G	.	.	ANN=G	intergenic_region	MODIFIER	LinJ.07.0200-LinJ.07.0210	LinJ.07.0200-LinJ.07.0210	intergenic_region	LinJ.07.0200-LinJ.07.0210	n.75797A>G
LinJ.07	90945	.	A	G	.	.	ANN=G	missense_variant	MODERATE	LinJ.07.0250	LinJ.07.0250	transcript	LinJ.07.0250:mRNA	protein_coding	2019-01-01	c.847A>G	p.Ile283Val	847/3099	847/3099	283/1032
LinJ.07	91193	.	C	T	.	.	ANN=T	synonymous_variant	LOW	LinJ.07.0250	LinJ.07.0250	transcript	LinJ.07.0250:mRNA	protein_coding	2019-01-01	c.1095C>T	p.Ala365Ala	1095/3099	1095/3099	365/1032
LinJ.07	92642	.	G	A	.	.	ANN=A	synonymous_variant	LOW	LinJ.07.0250	LinJ.07.0250	transcript	LinJ.07.0250:mRNA	protein_coding	2019-01-01	c.2544G>A	p.Lys848Lys	2544/3099	2544/3099	848/1032
LinJ.07	94423	.	A	G	.	.	ANN=G	intergenic_region	MODIFIER	LinJ.07.0250-LinJ.07.0260	LinJ.07.0250-LinJ.07.0260	intergenic_region	LinJ.07.0250-LinJ.07.0260	n.94423A>G
LinJ.07	95043	.	A	G	.	.	ANN=G	intergenic_region	MODIFIER	LinJ.07.0250-LinJ.07.0260	LinJ.07.0250-LinJ.07.0260	intergenic_region	LinJ.07.0250-LinJ.07.0260	n.95043A>G
LinJ.07	97101	.	G	A	.	.	ANN=A	missense_variant	MODERATE	LinJ.07.0260	LinJ.07.0260	transcript	LinJ.07.0260:mRNA	protein_coding	2019-01-01	c.858G>A	p.Met286Ile	858/1038	858/1038	286/345
LinJ.07	97308	.	C	A	.	.	ANN=A	intergenic_region	MODIFIER	LinJ.07.0260-LinJ.07.0270	LinJ.07.0260-LinJ.07.0270	intergenic_region	LinJ.07.0260-LinJ.07.0270	n.97308C>A
LinJ.07	97632	.	G	A	.	.	ANN=A	intergenic_region	MODIFIER	LinJ.07.0260-LinJ.07.0270	LinJ.07.0260-LinJ.07.0270	intergenic_region	LinJ.07.0260-LinJ.07.0270	n.97632G>A
LinJ.07	97968	.	A	G	.	.	ANN=G	intergenic_region	MODIFIER	LinJ.07.0260-LinJ.07.0270	LinJ.07.0260-LinJ.07.0270	intergenic_region	LinJ.07.0260-LinJ.07.0270	n.97968A>G
LinJ.07	97975	.	G	C	.	.	ANN=C	intergenic_region	MODIFIER	LinJ.07.0260-LinJ.07.0270	LinJ.07.0260-LinJ.07.0270	intergenic_region	LinJ.07.0260-LinJ.07.0270	n.97975G>C
LinJ.07	98042	.	T	C	.	.	ANN=C	intergenic_region	MODIFIER	LinJ.07.0260-LinJ.07.0270	LinJ.07.0260-LinJ.07.0270	intergenic_region	LinJ.07.0260-LinJ.07.0270	n.98042T>C
LinJ.07	98146	.	C	T	.	.	ANN=T	intergenic_region	MODIFIER	LinJ.07.0260-LinJ.07.0270	LinJ.07.0260-LinJ.07.0270	intergenic_region	LinJ.07.0260-LinJ.07.0270	n.98146C>T
LinJ.07	98263	.	A	G	.	.	ANN=G	intergenic_region	MODIFIER	LinJ.07.0260-LinJ.07.0270	LinJ.07.0260-LinJ.07.0270	intergenic_region	LinJ.07.0260-LinJ.07.0270	n.98263A>G
LinJ.07	98489	.	G	A	.	.	ANN=A	intergenic_region	MODIFIER	LinJ.07.0260-LinJ.07.0270	LinJ.07.0260-LinJ.07.0270	intergenic_region	LinJ.07.0260-LinJ.07.0270	n.98489G>A
LinJ.07	99552	.	G	T	.	.	ANN=T	synonymous_variant	LOW	LinJ.07.0270	LinJ.07.0270	transcript	LinJ.07.0270:mRNA	protein_coding	2019-01-01	c.810G>T	p.Leu270Leu	810/6678	810/6678	270/2225
LinJ.07	99709	.	G	A	.	.	ANN=A	missense_variant	MODERATE	LinJ.07.0270	LinJ.07.0270	transcript	LinJ.07.0270:mRNA	protein_coding	2019-01-01	c.967G>A	p.Ala323Thr	967/6678	967/6678	323/2225
LinJ.07	100452	.	A	G	.	.	ANN=G	synonymous_variant	LOW	LinJ.07.0270	LinJ.07.0270	transcript	LinJ.07.0270:mRNA	protein_coding	2019-01-01	c.1710A>G	p.Val570Val	1710/6678	1710/6678	570/2225
LinJ.07	100515	.	T	C	.	.	ANN=C	synonymous_variant	LOW	LinJ.07.0270	LinJ.07.0270	transcript	LinJ.07.0270:mRNA	protein_coding	2019-01-01	c.1773T>C	p.Phe591Phe	1773/6678	1773/6678	591/2225
LinJ.07	100636	.	A	C	.	.	ANN=C	missense_variant	MODERATE	LinJ.07.0270	LinJ.07.0270	transcript	LinJ.07.0270:mRNA	protein_coding	2019-01-01	c.1894A>C	p.Ile632Leu	1894/6678	1894/6678	632/2225
LinJ.07	101318	.	T	G	.	.	ANN=G	missense_variant	MODERATE	LinJ.07.0270	LinJ.07.0270	transcript	LinJ.07.0270:mRNA	protein_coding	2019-01-01	c.2576T>G	p.Phe859Cys	2576/6678	2576/6678	859/2225
LinJ.07	101638	.	C	T	.	.	ANN=T	missense_variant	MODERATE	LinJ.07.0270	LinJ.07.0270	transcript	LinJ.07.0270:mRNA	protein_coding	2019-01-01	c.2896C>T	p.Arg966Cys	2896/6678	2896/6678	966/2225
LinJ.07	101674	.	G	A	.	.	ANN=A	missense_variant	MODERATE	LinJ.07.0270	LinJ.07.0270	transcript	LinJ.07.0270:mRNA	protein_coding	2019-01-01	c.2932G>A	p.Val978Ile	2932/6678	2932/6678	978/2225
LinJ.07	102612	.	A	G	.	.	ANN=G	synonymous_variant	LOW	LinJ.07.0270	LinJ.07.0270	transcript	LinJ.07.0270:mRNA	protein_coding	2019-01-01	c.3870A>G	p.Thr1290Thr	3870/6678	3870/6678	1290/2225
LinJ.07	106119	.	C	A	.	.	ANN=A	intergenic_region	MODIFIER	LinJ.07.0270-LinJ.07.0280	LinJ.07.0270-LinJ.07.0280	intergenic_region	LinJ.07.0270-LinJ.07.0280	n.106119C>A
LinJ.07	106168	.	A	C	.	.	ANN=C	intergenic_region	MODIFIER	LinJ.07.0270-LinJ.07.0280	LinJ.07.0270-LinJ.07.0280	intergenic_region	LinJ.07.0270-LinJ.07.0280	n.106168A>C
LinJ.07	106461	.	T	G	.	.	ANN=G	synonymous_variant	LOW	LinJ.07.0280	LinJ.07.0280	transcript	LinJ.07.0280:mRNA	protein_coding	2019-01-01	c.273T>G	p.Ala91Ala	273/1842	273/1842	91/613
LinJ.07	109224	.	A	G	.	.	ANN=G	synonymous_variant	LOW	LinJ.07.0300	LinJ.07.0300	transcript	LinJ.07.0300:mRNA	protein_coding	2019-01-01	c.645A>G	p.Leu215Leu	645/1059	645/1059	215/352
LinJ.07	111346	.	T	C	.	.	ANN=C	synonymous_variant	LOW	LinJ.07.0310	LinJ.07.0310	transcript	LinJ.07.0310:mRNA	protein_coding	2019-01-01	c.885T>C	p.Asn295Asn	885/1854	885/1854	295/617
LinJ.07	111883	.	A	G	.	.	ANN=G	synonymous_variant	LOW	LinJ.07.0310	LinJ.07.0310	transcript	LinJ.07.0310:mRNA	protein_coding	2019-01-01	c.1422A>G	p.Leu474Leu	1422/1854	1422/1854	474/617
LinJ.07	113982	.	G	A	.	.	ANN=A	intergenic_region	MODIFIER	LinJ.07.0310-LinJ.07.0320	LinJ.07.0310-LinJ.07.0320	intergenic_region	LinJ.07.0310-LinJ.07.0320	n.113982G>A
LinJ.07	114694	.	G	A	.	.	ANN=A	intergenic_region	MODIFIER	LinJ.07.0310-LinJ.07.0320	LinJ.07.0310-LinJ.07.0320	intergenic_region	LinJ.07.0310-LinJ.07.0320	n.114694G>A
LinJ.07	116507	.	A	G	.	.	ANN=G	missense_variant	MODERATE	LinJ.07.0320	LinJ.07.0320	transcript	LinJ.07.0320:mRNA	protein_coding	2019-01-01	c.2237T>C	p.Leu746Ser	2237/2547	2237/2547	746/848
LinJ.07	116912	.	G	A	.	.	ANN=A	missense_variant	MODERATE	LinJ.07.0320	LinJ.07.0320	transcript	LinJ.07.0320:mRNA	protein_coding	2019-01-01	c.1832C>T	p.Pro611Leu	1832/2547	1832/2547	611/848
LinJ.07	117769	.	C	T	.	.	ANN=T	synonymous_variant	LOW	LinJ.07.0320	LinJ.07.0320	transcript	LinJ.07.0320:mRNA	protein_coding	2019-01-01	c.975G>A	p.Pro325Pro	975/2547	975/2547	325/848
LinJ.07	117823	.	C	G	.	.	ANN=G	synonymous_variant	LOW	LinJ.07.0320	LinJ.07.0320	transcript	LinJ.07.0320:mRNA	protein_coding	2019-01-01	c.921G>C	p.Ser307Ser	921/2547	921/2547	307/848
LinJ.07	118891	.	C	T	.	.	ANN=T	intergenic_region	MODIFIER	LinJ.07.0320-LinJ.07.0330	LinJ.07.0320-LinJ.07.0330	intergenic_region	LinJ.07.0320-LinJ.07.0330	n.118891C>T
LinJ.07	123077	.	T	C	.	.	ANN=C	intergenic_region	MODIFIER	LinJ.07.0320-LinJ.07.0330	LinJ.07.0320-LinJ.07.0330	intergenic_region	LinJ.07.0320-LinJ.07.0330	n.123077T>C
LinJ.07	123223	.	C	T	.	.	ANN=T	intergenic_region	MODIFIER	LinJ.07.0320-LinJ.07.0330	LinJ.07.0320-LinJ.07.0330	intergenic_region	LinJ.07.0320-LinJ.07.0330	n.123223C>T
LinJ.07	178777	.	G	T	.	.	ANN=T	missense_variant	MODERATE	LinJ.07.0440	LinJ.07.0440	transcript	LinJ.07.0440:mRNA	protein_coding	2019-01-01	c.3587C>A	p.Ala1196Glu	3587/18804	3587/18804	1196/6267
LinJ.07	183481	.	G	A	.	.	ANN=A	intergenic_region	MODIFIER	LinJ.07.0440-LinJ.07.0450	LinJ.07.0440-LinJ.07.0450	intergenic_region	LinJ.07.0440-LinJ.07.0450	n.183481G>A
LinJ.07	183484	.	T	C	.	.	ANN=C	intergenic_region	MODIFIER	LinJ.07.0440-LinJ.07.0450	LinJ.07.0440-LinJ.07.0450	intergenic_region	LinJ.07.0440-LinJ.07.0450	n.183484T>C
LinJ.07	183928	.	G	A	.	.	ANN=A	intergenic_region	MODIFIER	LinJ.07.0440-LinJ.07.0450	LinJ.07.0440-LinJ.07.0450	intergenic_region	LinJ.07.0440-LinJ.07.0450	n.183928G>A
LinJ.07	184462	.	T	C	.	.	ANN=C	intergenic_region	MODIFIER	LinJ.07.0440-LinJ.07.0450	LinJ.07.0440-LinJ.07.0450	intergenic_region	LinJ.07.0440-LinJ.07.0450	n.184462T>C
LinJ.07	184559	.	C	T	.	.	ANN=T	intergenic_region	MODIFIER	LinJ.07.0440-LinJ.07.0450	LinJ.07.0440-LinJ.07.0450	intergenic_region	LinJ.07.0440-LinJ.07.0450	n.184559C>T
LinJ.07	185616	.	C	T	.	.	ANN=T	intergenic_region	MODIFIER	LinJ.07.0440-LinJ.07.0450	LinJ.07.0440-LinJ.07.0450	intergenic_region	LinJ.07.0440-LinJ.07.0450	n.185616C>T
LinJ.07	187279	.	C	T	.	.	ANN=T	intergenic_region	MODIFIER	LinJ.07.0450-LinJ.07.0460	LinJ.07.0450-LinJ.07.0460	intergenic_region	LinJ.07.0450-LinJ.07.0460	n.187279C>T
LinJ.07	191065	.	A	G	.	.	ANN=G	intergenic_region	MODIFIER	LinJ.07.0460-LinJ.07.0470	LinJ.07.0460-LinJ.07.0470	intergenic_region	LinJ.07.0460-LinJ.07.0470	n.191065A>G
LinJ.07	192354	.	C	T	.	.	ANN=T	synonymous_variant	LOW	LinJ.07.0470	LinJ.07.0470	transcript	LinJ.07.0470:mRNA	protein_coding	2019-01-01	c.1707G>A	p.Gln569Gln	1707/2430	1707/2430	569/809
LinJ.07	194751	.	G	A	.	.	ANN=A	intergenic_region	MODIFIER	LinJ.07.0470-LinJ.07.0480	LinJ.07.0470-LinJ.07.0480	intergenic_region	LinJ.07.0470-LinJ.07.0480	n.194751G>A
LinJ.07	195689	.	G	T	.	.	ANN=T	missense_variant	MODERATE	LinJ.07.0480	LinJ.07.0480	transcript	LinJ.07.0480:mRNA	protein_coding	2019-01-01	c.2986C>A	p.His996Asn	2986/3138	2986/3138	996/1045
LinJ.07	199911	.	C	A	.	.	ANN=A	missense_variant	MODERATE	LinJ.07.0490	LinJ.07.0490	transcript	LinJ.07.0490:mRNA	protein_coding	2019-01-01	c.2473G>T	p.Ala825Ser	2473/2508	2473/2508	825/835
LinJ.07	199932	.	T	G	.	.	ANN=G	missense_variant	MODERATE	LinJ.07.0490	LinJ.07.0490	transcript	LinJ.07.0490:mRNA	protein_coding	2019-01-01	c.2452A>C	p.Met818Leu	2452/2508	2452/2508	818/835
LinJ.07	200233	.	A	G	.	.	ANN=G	synonymous_variant	LOW	LinJ.07.0490	LinJ.07.0490	transcript	LinJ.07.0490:mRNA	protein_coding	2019-01-01	c.2151T>C	p.His717His	2151/2508	2151/2508	717/835
LinJ.07	202385	.	C	A	.	.	ANN=A	intergenic_region	MODIFIER	LinJ.07.0490-LinJ.07.0500	LinJ.07.0490-LinJ.07.0500	intergenic_region	LinJ.07.0490-LinJ.07.0500	n.202385C>A
LinJ.07	203290	.	T	C	.	.	ANN=C	intergenic_region	MODIFIER	LinJ.07.0490-LinJ.07.0500	LinJ.07.0490-LinJ.07.0500	intergenic_region	LinJ.07.0490-LinJ.07.0500	n.203290T>C
LinJ.07	203387	.	A	G	.	.	ANN=G	intergenic_region	MODIFIER	LinJ.07.0490-LinJ.07.0500	LinJ.07.0490-LinJ.07.0500	intergenic_region	LinJ.07.0490-LinJ.07.0500	n.203387A>G
LinJ.07	204553	.	A	G	.	.	ANN=G	synonymous_variant	LOW	LinJ.07.0500	LinJ.07.0500	transcript	LinJ.07.0500:mRNA	protein_coding	2019-01-01	c.1725T>C	p.Leu575Leu	1725/2757	1725/2757	575/918
LinJ.07	205637	.	G	A	.	.	ANN=A	missense_variant	MODERATE	LinJ.07.0500	LinJ.07.0500	transcript	LinJ.07.0500:mRNA	protein_coding	2019-01-01	c.641C>T	p.Ala214Val	641/2757	641/2757	214/918
LinJ.07	205688	.	A	G	.	.	ANN=G	missense_variant	MODERATE	LinJ.07.0500	LinJ.07.0500	transcript	LinJ.07.0500:mRNA	protein_coding	2019-01-01	c.590T>C	p.Val197Ala	590/2757	590/2757	197/918
LinJ.07	206076	.	T	C	.	.	ANN=C	missense_variant	MODERATE	LinJ.07.0500	LinJ.07.0500	transcript	LinJ.07.0500:mRNA	protein_coding	2019-01-01	c.202A>G	p.Thr68Ala	202/2757	202/2757	68/918
LinJ.07	206211	.	T	C	.	.	ANN=C	missense_variant	MODERATE	LinJ.07.0500	LinJ.07.0500	transcript	LinJ.07.0500:mRNA	protein_coding	2019-01-01	c.67A>G	p.Lys23Glu	67/2757	67/2757	23/918
LinJ.07	206251	.	G	A	.	.	ANN=A	synonymous_variant	LOW	LinJ.07.0500	LinJ.07.0500	transcript	LinJ.07.0500:mRNA	protein_coding	2019-01-01	c.27C>T	p.Ala9Ala	27/2757	27/2757	9/918
LinJ.07	206571	.	A	G	.	.	ANN=G	intergenic_region	MODIFIER	LinJ.07.0500-LinJ.07.0510	LinJ.07.0500-LinJ.07.0510	intergenic_region	LinJ.07.0500-LinJ.07.0510	n.206571A>G
LinJ.07	207052	.	C	G	.	.	ANN=G	intergenic_region	MODIFIER	LinJ.07.0500-LinJ.07.0510	LinJ.07.0500-LinJ.07.0510	intergenic_region	LinJ.07.0500-LinJ.07.0510	n.207052C>G
LinJ.07	207864	.	C	T	.	.	ANN=T	intergenic_region	MODIFIER	LinJ.07.0500-LinJ.07.0510	LinJ.07.0500-LinJ.07.0510	intergenic_region	LinJ.07.0500-LinJ.07.0510	n.207864C>T
LinJ.07	207971	.	A	G	.	.	ANN=G	intergenic_region	MODIFIER	LinJ.07.0500-LinJ.07.0510	LinJ.07.0500-LinJ.07.0510	intergenic_region	LinJ.07.0500-LinJ.07.0510	n.207971A>G
LinJ.07	208877	.	A	G	.	.	ANN=G	intergenic_region	MODIFIER	LinJ.07.0500-LinJ.07.0510	LinJ.07.0500-LinJ.07.0510	intergenic_region	LinJ.07.0500-LinJ.07.0510	n.208877A>G
LinJ.07	210073	.	C	A	.	.	ANN=A	intergenic_region	MODIFIER	LinJ.07.0500-LinJ.07.0510	LinJ.07.0500-LinJ.07.0510	intergenic_region	LinJ.07.0500-LinJ.07.0510	n.210073C>A
LinJ.07	210091	.	T	C	.	.	ANN=C	intergenic_region	MODIFIER	LinJ.07.0500-LinJ.07.0510	LinJ.07.0500-LinJ.07.0510	intergenic_region	LinJ.07.0500-LinJ.07.0510	n.210091T>C
LinJ.07	210115	.	A	G	.	.	ANN=G	intergenic_region	MODIFIER	LinJ.07.0500-LinJ.07.0510	LinJ.07.0500-LinJ.07.0510	intergenic_region	LinJ.07.0500-LinJ.07.0510	n.210115A>G
LinJ.07	210119	.	A	G	.	.	ANN=G	intergenic_region	MODIFIER	LinJ.07.0500-LinJ.07.0510	LinJ.07.0500-LinJ.07.0510	intergenic_region	LinJ.07.0500-LinJ.07.0510	n.210119A>G
LinJ.07	210299	.	G	A	.	.	ANN=A	intergenic_region	MODIFIER	LinJ.07.0500-LinJ.07.0510	LinJ.07.0500-LinJ.07.0510	intergenic_region	LinJ.07.0500-LinJ.07.0510	n.210299G>A
LinJ.07	210392	.	T	G	.	.	ANN=G	intergenic_region	MODIFIER	LinJ.07.0500-LinJ.07.0510	LinJ.07.0500-LinJ.07.0510	intergenic_region	LinJ.07.0500-LinJ.07.0510	n.210392T>G
LinJ.07	210525	.	A	C	.	.	ANN=C	intergenic_region	MODIFIER	LinJ.07.0500-LinJ.07.0510	LinJ.07.0500-LinJ.07.0510	intergenic_region	LinJ.07.0500-LinJ.07.0510	n.210525A>C
LinJ.07	213264	.	T	C	.	.	ANN=C	missense_variant	MODERATE	LinJ.07.0510	LinJ.07.0510	transcript	LinJ.07.0510:mRNA	protein_coding	2019-01-01	c.2065T>C	p.Phe689Leu	2065/2592	2065/2592	689/863
LinJ.07	214057	.	C	T	.	.	ANN=T	intergenic_region	MODIFIER	LinJ.07.0510-LinJ.07.0520	LinJ.07.0510-LinJ.07.0520	intergenic_region	LinJ.07.0510-LinJ.07.0520	n.214057C>T
LinJ.07	217016	.	G	C	.	.	ANN=C	intergenic_region	MODIFIER	LinJ.07.0510-LinJ.07.0520	LinJ.07.0510-LinJ.07.0520	intergenic_region	LinJ.07.0510-LinJ.07.0520	n.217016G>C
LinJ.07	218826	.	A	G	.	.	ANN=G	intergenic_region	MODIFIER	LinJ.07.0510-LinJ.07.0520	LinJ.07.0510-LinJ.07.0520	intergenic_region	LinJ.07.0510-LinJ.07.0520	n.218826A>G
LinJ.07	218992	.	G	A	.	.	ANN=A	intergenic_region	MODIFIER	LinJ.07.0510-LinJ.07.0520	LinJ.07.0510-LinJ.07.0520	intergenic_region	LinJ.07.0510-LinJ.07.0520	n.218992G>A
LinJ.07	219571	.	A	G	.	.	ANN=G	intergenic_region	MODIFIER	LinJ.07.0520-LinJ.07.0530	LinJ.07.0520-LinJ.07.0530	intergenic_region	LinJ.07.0520-LinJ.07.0530	n.219571A>G
LinJ.07	223255	.	T	C	.	.	ANN=C	missense_variant	MODERATE	LinJ.07.0530	LinJ.07.0530	transcript	LinJ.07.0530:mRNA	protein_coding	2019-01-01	c.3440T>C	p.Ile1147Thr	3440/14550	3440/14550	1147/4849
LinJ.07	227331	.	T	C	.	.	ANN=C	missense_variant	MODERATE	LinJ.07.0530	LinJ.07.0530	transcript	LinJ.07.0530:mRNA	protein_coding	2019-01-01	c.7516T>C	p.Ser2506Pro	7516/14550	7516/14550	2506/4849
LinJ.07	228278	.	T	G	.	.	ANN=G	missense_variant	MODERATE	LinJ.07.0530	LinJ.07.0530	transcript	LinJ.07.0530:mRNA	protein_coding	2019-01-01	c.8463T>G	p.Phe2821Leu	8463/14550	8463/14550	2821/4849
LinJ.07	230190	.	T	G	.	.	ANN=G	missense_variant	MODERATE	LinJ.07.0530	LinJ.07.0530	transcript	LinJ.07.0530:mRNA	protein_coding	2019-01-01	c.10375T>G	p.Leu3459Val	10375/14550	10375/14550	3459/4849
LinJ.07	271484	.	C	G	.	.	ANN=G	missense_variant	MODERATE	LinJ.07.0630	LinJ.07.0630	transcript	LinJ.07.0630:mRNA	protein_coding	2019-01-01	c.328C>G	p.Pro110Ala	328/4107	328/4107	110/1368
LinJ.07	276617	.	G	A	.	.	ANN=A	missense_variant	MODERATE	LinJ.07.0640	LinJ.07.0640	transcript	LinJ.07.0640:mRNA	protein_coding	2019-01-01	c.773G>A	p.Arg258His	773/2341	773/2340	258/779	WARNING_TRANSCRIPT_NO_STOP_CODON
LinJ.07	280529	.	G	T	.	.	ANN=T	synonymous_variant	LOW	LinJ.07.0650	LinJ.07.0650	transcript	LinJ.07.0650:mRNA	protein_coding	2019-01-01	c.993G>T	p.Ala331Ala	993/2496	993/2496	331/831
LinJ.07	297376	.	A	G	.	.	ANN=G	intergenic_region	MODIFIER	LinJ.07.0700-LinJ.07.0710	LinJ.07.0700-LinJ.07.0710	intergenic_region	LinJ.07.0700-LinJ.07.0710	n.297376A>G
LinJ.07	297448	.	T	G	.	.	ANN=G	intergenic_region	MODIFIER	LinJ.07.0700-LinJ.07.0710	LinJ.07.0700-LinJ.07.0710	intergenic_region	LinJ.07.0700-LinJ.07.0710	n.297448T>G
LinJ.07	297601	.	A	G	.	.	ANN=G	intergenic_region	MODIFIER	LinJ.07.0700-LinJ.07.0710	LinJ.07.0700-LinJ.07.0710	intergenic_region	LinJ.07.0700-LinJ.07.0710	n.297601A>G
LinJ.07	298041	.	C	T	.	.	ANN=T	intergenic_region	MODIFIER	LinJ.07.0700-LinJ.07.0710	LinJ.07.0700-LinJ.07.0710	intergenic_region	LinJ.07.0700-LinJ.07.0710	n.298041C>T
LinJ.07	298050	.	T	C	.	.	ANN=C	intergenic_region	MODIFIER	LinJ.07.0700-LinJ.07.0710	LinJ.07.0700-LinJ.07.0710	intergenic_region	LinJ.07.0700-LinJ.07.0710	n.298050T>C
LinJ.07	298148	.	C	G	.	.	ANN=G	intergenic_region	MODIFIER	LinJ.07.0700-LinJ.07.0710	LinJ.07.0700-LinJ.07.0710	intergenic_region	LinJ.07.0700-LinJ.07.0710	n.298148C>G
LinJ.07	298226	.	G	A	.	.	ANN=A	intergenic_region	MODIFIER	LinJ.07.0700-LinJ.07.0710	LinJ.07.0700-LinJ.07.0710	intergenic_region	LinJ.07.0700-LinJ.07.0710	n.298226G>A
LinJ.07	298560	.	C	T	.	.	ANN=T	intergenic_region	MODIFIER	LinJ.07.0700-LinJ.07.0710	LinJ.07.0700-LinJ.07.0710	intergenic_region	LinJ.07.0700-LinJ.07.0710	n.298560C>T
LinJ.07	298676	.	C	T	.	.	ANN=T	intergenic_region	MODIFIER	LinJ.07.0700-LinJ.07.0710	LinJ.07.0700-LinJ.07.0710	intergenic_region	LinJ.07.0700-LinJ.07.0710	n.298676C>T
LinJ.07	298719	.	C	T	.	.	ANN=T	intergenic_region	MODIFIER	LinJ.07.0700-LinJ.07.0710	LinJ.07.0700-LinJ.07.0710	intergenic_region	LinJ.07.0700-LinJ.07.0710	n.298719C>T
LinJ.07	298781	.	T	C	.	.	ANN=C	intergenic_region	MODIFIER	LinJ.07.0700-LinJ.07.0710	LinJ.07.0700-LinJ.07.0710	intergenic_region	LinJ.07.0700-LinJ.07.0710	n.298781T>C
LinJ.07	298843	.	G	T	.	.	ANN=T	intergenic_region	MODIFIER	LinJ.07.0700-LinJ.07.0710	LinJ.07.0700-LinJ.07.0710	intergenic_region	LinJ.07.0700-LinJ.07.0710	n.298843G>T
LinJ.07	300382	.	G	A	.	.	ANN=A	intergenic_region	MODIFIER	LinJ.07.0710-LinJ.07.0720	LinJ.07.0710-LinJ.07.0720	intergenic_region	LinJ.07.0710-LinJ.07.0720	n.300382G>A
LinJ.07	301172	.	C	T	.	.	ANN=T	intergenic_region	MODIFIER	LinJ.07.0710-LinJ.07.0720	LinJ.07.0710-LinJ.07.0720	intergenic_region	LinJ.07.0710-LinJ.07.0720	n.301172C>T
LinJ.07	306100	.	A	G	.	.	ANN=G	intergenic_region	MODIFIER	LinJ.07.0730-LinJ.07.0740	LinJ.07.0730-LinJ.07.0740	intergenic_region	LinJ.07.0730-LinJ.07.0740	n.306100A>G
LinJ.07	306164	.	G	A	.	.	ANN=A	intergenic_region	MODIFIER	LinJ.07.0730-LinJ.07.0740	LinJ.07.0730-LinJ.07.0740	intergenic_region	LinJ.07.0730-LinJ.07.0740	n.306164G>A
LinJ.07	307109	.	T	C	.	.	ANN=C	intergenic_region	MODIFIER	LinJ.07.0730-LinJ.07.0740	LinJ.07.0730-LinJ.07.0740	intergenic_region	LinJ.07.0730-LinJ.07.0740	n.307109T>C
LinJ.07	307115	.	T	C	.	.	ANN=C	intergenic_region	MODIFIER	LinJ.07.0730-LinJ.07.0740	LinJ.07.0730-LinJ.07.0740	intergenic_region	LinJ.07.0730-LinJ.07.0740	n.307115T>C
LinJ.07	307363	.	C	T	.	.	ANN=T	intergenic_region	MODIFIER	LinJ.07.0730-LinJ.07.0740	LinJ.07.0730-LinJ.07.0740	intergenic_region	LinJ.07.0730-LinJ.07.0740	n.307363C>T
LinJ.07	307392	.	C	T	.	.	ANN=T	intergenic_region	MODIFIER	LinJ.07.0730-LinJ.07.0740	LinJ.07.0730-LinJ.07.0740	intergenic_region	LinJ.07.0730-LinJ.07.0740	n.307392C>T
LinJ.07	309585	.	C	G	.	.	ANN=G	missense_variant	MODERATE	LinJ.07.0740	LinJ.07.0740	transcript	LinJ.07.0740:mRNA	protein_coding	2019-01-01	c.1422C>G	p.Asp474Glu	1422/1560	1422/1560	474/519
LinJ.07	309943	.	T	C	.	.	ANN=C	intergenic_region	MODIFIER	LinJ.07.0740-LinJ.07.0750	LinJ.07.0740-LinJ.07.0750	intergenic_region	LinJ.07.0740-LinJ.07.0750	n.309943T>C
LinJ.07	310152	.	C	T	.	.	ANN=T	intergenic_region	MODIFIER	LinJ.07.0740-LinJ.07.0750	LinJ.07.0740-LinJ.07.0750	intergenic_region	LinJ.07.0740-LinJ.07.0750	n.310152C>T
LinJ.07	310865	.	T	C	.	.	ANN=C	intergenic_region	MODIFIER	LinJ.07.0740-LinJ.07.0750	LinJ.07.0740-LinJ.07.0750	intergenic_region	LinJ.07.0740-LinJ.07.0750	n.310865T>C
LinJ.07	331579	.	C	T	.	.	ANN=T	intergenic_region	MODIFIER	LinJ.07.0800-LinJ.07.0810	LinJ.07.0800-LinJ.07.0810	intergenic_region	LinJ.07.0800-LinJ.07.0810	n.331579C>T
LinJ.07	334749	.	C	T	.	.	ANN=T	synonymous_variant	LOW	LinJ.07.0810	LinJ.07.0810	transcript	LinJ.07.0810:mRNA	protein_coding	2019-01-01	c.2541C>T	p.Asp847Asp	2541/3786	2541/3786	847/1261
LinJ.07	334923	.	G	A	.	.	ANN=A	synonymous_variant	LOW	LinJ.07.0810	LinJ.07.0810	transcript	LinJ.07.0810:mRNA	protein_coding	2019-01-01	c.2715G>A	p.Arg905Arg	2715/3786	2715/3786	905/1261
LinJ.07	335044	.	G	C	.	.	ANN=C	missense_variant	MODERATE	LinJ.07.0810	LinJ.07.0810	transcript	LinJ.07.0810:mRNA	protein_coding	2019-01-01	c.2836G>C	p.Ala946Pro	2836/3786	2836/3786	946/1261
LinJ.07	335093	.	C	T	.	.	ANN=T	missense_variant	MODERATE	LinJ.07.0810	LinJ.07.0810	transcript	LinJ.07.0810:mRNA	protein_coding	2019-01-01	c.2885C>T	p.Thr962Met	2885/3786	2885/3786	962/1261
LinJ.07	343038	.	G	C	.	.	ANN=C	missense_variant	MODERATE	LinJ.07.0830	LinJ.07.0830	transcript	LinJ.07.0830:mRNA	protein_coding	2019-01-01	c.230G>C	p.Gly77Ala	230/11418	230/11418	77/3805
LinJ.07	366885	.	T	C	.	.	ANN=C	missense_variant	MODERATE	LinJ.07.0870	LinJ.07.0870	transcript	LinJ.07.0870:mRNA	protein_coding	2019-01-01	c.962T>C	p.Val321Ala	962/3933	962/3933	321/1310
LinJ.07	378443	.	A	G	.	.	ANN=G	synonymous_variant	LOW	LinJ.07.0890	LinJ.07.0890	transcript	LinJ.07.0890:mRNA	protein_coding	2019-01-01	c.777A>G	p.Ala259Ala	777/1698	777/1698	259/565
LinJ.07	380433	.	T	C	.	.	ANN=C	missense_variant	MODERATE	LinJ.07.0900	LinJ.07.0900	transcript	LinJ.07.0900:mRNA	protein_coding	2019-01-01	c.323T>C	p.Leu108Pro	323/978	323/978	108/325
LinJ.07	380456	.	A	G	.	.	ANN=G	missense_variant	MODERATE	LinJ.07.0900	LinJ.07.0900	transcript	LinJ.07.0900:mRNA	protein_coding	2019-01-01	c.346A>G	p.Thr116Ala	346/978	346/978	116/325
LinJ.07	383824	.	T	C	.	.	ANN=C	synonymous_variant	LOW	LinJ.07.0910	LinJ.07.0910	transcript	LinJ.07.0910:mRNA	protein_coding	2019-01-01	c.903T>C	p.Gly301Gly	903/1704	903/1704	301/567
LinJ.07	384930	.	C	T	.	.	ANN=T	intergenic_region	MODIFIER	LinJ.07.0910-LinJ.07.tRNA1	LinJ.07.0910-LinJ.07.tRNA1	intergenic_region	LinJ.07.0910-LinJ.07.tRNA1	n.384930C>T
LinJ.07	385366	.	T	C	.	.	ANN=C	intergenic_region	MODIFIER	LinJ.07.0910-LinJ.07.tRNA1	LinJ.07.0910-LinJ.07.tRNA1	intergenic_region	LinJ.07.0910-LinJ.07.tRNA1	n.385366T>C
LinJ.07	385528	.	A	G	.	.	ANN=G	intergenic_region	MODIFIER	LinJ.07.0910-LinJ.07.tRNA1	LinJ.07.0910-LinJ.07.tRNA1	intergenic_region	LinJ.07.0910-LinJ.07.tRNA1	n.385528A>G
LinJ.07	386132	.	G	A	.	.	ANN=A	intergenic_region	MODIFIER	LinJ.07.0910-LinJ.07.tRNA1	LinJ.07.0910-LinJ.07.tRNA1	intergenic_region	LinJ.07.0910-LinJ.07.tRNA1	n.386132G>A
LinJ.07	386238	.	A	G	.	.	ANN=G	intergenic_region	MODIFIER	LinJ.07.0910-LinJ.07.tRNA1	LinJ.07.0910-LinJ.07.tRNA1	intergenic_region	LinJ.07.0910-LinJ.07.tRNA1	n.386238A>G
LinJ.07	386346	.	T	C	.	.	ANN=C	intergenic_region	MODIFIER	LinJ.07.0910-LinJ.07.tRNA1	LinJ.07.0910-LinJ.07.tRNA1	intergenic_region	LinJ.07.0910-LinJ.07.tRNA1	n.386346T>C
LinJ.07	387206	.	G	C	.	.	ANN=C	intergenic_region	MODIFIER	LinJ.07.0910-LinJ.07.tRNA1	LinJ.07.0910-LinJ.07.tRNA1	intergenic_region	LinJ.07.0910-LinJ.07.tRNA1	n.387206G>C
LinJ.07	387683	.	T	A	.	.	ANN=A	intergenic_region	MODIFIER	LinJ.07.tRNA1-LinJ.07.0920	LinJ.07.tRNA1-LinJ.07.0920	intergenic_region	LinJ.07.tRNA1-LinJ.07.0920	n.387683T>A
LinJ.07	387820	.	C	A	.	.	ANN=A	intergenic_region	MODIFIER	LinJ.07.tRNA1-LinJ.07.0920	LinJ.07.tRNA1-LinJ.07.0920	intergenic_region	LinJ.07.tRNA1-LinJ.07.0920	n.387820C>A
LinJ.07	388109	.	A	C	.	.	ANN=C	synonymous_variant	LOW	LinJ.07.0920	LinJ.07.0920	transcript	LinJ.07.0920:mRNA	protein_coding	2019-01-01	c.78A>C	p.Ala26Ala	78/1059	78/1059	26/352
LinJ.07	388622	.	A	G	.	.	ANN=G	synonymous_variant	LOW	LinJ.07.0920	LinJ.07.0920	transcript	LinJ.07.0920:mRNA	protein_coding	2019-01-01	c.591A>G	p.Gln197Gln	591/1059	591/1059	197/352
LinJ.07	390537	.	G	A	.	.	ANN=A	synonymous_variant	LOW	LinJ.07.0930	LinJ.07.0930	transcript	LinJ.07.0930:mRNA	protein_coding	2019-01-01	c.579G>A	p.Pro193Pro	579/1794	579/1794	193/597
LinJ.07	390607	.	C	G	.	.	ANN=G	missense_variant	MODERATE	LinJ.07.0930	LinJ.07.0930	transcript	LinJ.07.0930:mRNA	protein_coding	2019-01-01	c.649C>G	p.Leu217Val	649/1794	649/1794	217/597
LinJ.07	390694	.	C	G	.	.	ANN=G	missense_variant	MODERATE	LinJ.07.0930	LinJ.07.0930	transcript	LinJ.07.0930:mRNA	protein_coding	2019-01-01	c.736C>G	p.Gln246Glu	736/1794	736/1794	246/597
LinJ.07	392549	.	T	C	.	.	ANN=C	intergenic_region	MODIFIER	LinJ.07.0930-LinJ.07.0940	LinJ.07.0930-LinJ.07.0940	intergenic_region	LinJ.07.0930-LinJ.07.0940	n.392549T>C
LinJ.07	392992	.	A	C	.	.	ANN=C	intergenic_region	MODIFIER	LinJ.07.0930-LinJ.07.0940	LinJ.07.0930-LinJ.07.0940	intergenic_region	LinJ.07.0930-LinJ.07.0940	n.392992A>C
LinJ.07	395661	.	A	G	.	.	ANN=G	intergenic_region	MODIFIER	LinJ.07.0940-LinJ.07.0950	LinJ.07.0940-LinJ.07.0950	intergenic_region	LinJ.07.0940-LinJ.07.0950	n.395661A>G
LinJ.07	396720	.	G	A	.	.	ANN=A	intergenic_region	MODIFIER	LinJ.07.0940-LinJ.07.0950	LinJ.07.0940-LinJ.07.0950	intergenic_region	LinJ.07.0940-LinJ.07.0950	n.396720G>A
LinJ.07	396980	.	T	G	.	.	ANN=G	intergenic_region	MODIFIER	LinJ.07.0940-LinJ.07.0950	LinJ.07.0940-LinJ.07.0950	intergenic_region	LinJ.07.0940-LinJ.07.0950	n.396980T>G
LinJ.07	411569	.	T	C	.	.	ANN=C	intergenic_region	MODIFIER	LinJ.07.0970-LinJ.07.0980	LinJ.07.0970-LinJ.07.0980	intergenic_region	LinJ.07.0970-LinJ.07.0980	n.411569T>C
LinJ.07	411590	.	G	T	.	.	ANN=T	intergenic_region	MODIFIER	LinJ.07.0970-LinJ.07.0980	LinJ.07.0970-LinJ.07.0980	intergenic_region	LinJ.07.0970-LinJ.07.0980	n.411590G>T
LinJ.07	411730	.	G	A	.	.	ANN=A	intergenic_region	MODIFIER	LinJ.07.0970-LinJ.07.0980	LinJ.07.0970-LinJ.07.0980	intergenic_region	LinJ.07.0970-LinJ.07.0980	n.411730G>A
LinJ.07	411891	.	A	G	.	.	ANN=G	intergenic_region	MODIFIER	LinJ.07.0970-LinJ.07.0980	LinJ.07.0970-LinJ.07.0980	intergenic_region	LinJ.07.0970-LinJ.07.0980	n.411891A>G
LinJ.07	411971	.	T	A	.	.	ANN=A	synonymous_variant	LOW	LinJ.07.0980	LinJ.07.0980	transcript	LinJ.07.0980:mRNA	protein_coding	2019-01-01	c.42T>A	p.Gly14Gly	42/1317	42/1317	14/438
LinJ.07	413012	.	C	T	.	.	ANN=T	synonymous_variant	LOW	LinJ.07.0980	LinJ.07.0980	transcript	LinJ.07.0980:mRNA	protein_coding	2019-01-01	c.1083C>T	p.Ala361Ala	1083/1317	1083/1317	361/438
LinJ.07	413098	.	A	C	.	.	ANN=C	missense_variant	MODERATE	LinJ.07.0980	LinJ.07.0980	transcript	LinJ.07.0980:mRNA	protein_coding	2019-01-01	c.1169A>C	p.Lys390Thr	1169/1317	1169/1317	390/438
LinJ.07	413294	.	T	C	.	.	ANN=C	intergenic_region	MODIFIER	LinJ.07.0980-LinJ.07.0990	LinJ.07.0980-LinJ.07.0990	intergenic_region	LinJ.07.0980-LinJ.07.0990	n.413294T>C
LinJ.07	413415	.	A	G	.	.	ANN=G	intergenic_region	MODIFIER	LinJ.07.0980-LinJ.07.0990	LinJ.07.0980-LinJ.07.0990	intergenic_region	LinJ.07.0980-LinJ.07.0990	n.413415A>G
LinJ.07	413481	.	G	C	.	.	ANN=C	intergenic_region	MODIFIER	LinJ.07.0980-LinJ.07.0990	LinJ.07.0980-LinJ.07.0990	intergenic_region	LinJ.07.0980-LinJ.07.0990	n.413481G>C
LinJ.07	413664	.	A	G	.	.	ANN=G	intergenic_region	MODIFIER	LinJ.07.0980-LinJ.07.0990	LinJ.07.0980-LinJ.07.0990	intergenic_region	LinJ.07.0980-LinJ.07.0990	n.413664A>G
LinJ.07	414081	.	C	A	.	.	ANN=A	intergenic_region	MODIFIER	LinJ.07.0980-LinJ.07.0990	LinJ.07.0980-LinJ.07.0990	intergenic_region	LinJ.07.0980-LinJ.07.0990	n.414081C>A
LinJ.07	414595	.	C	T	.	.	ANN=T	intergenic_region	MODIFIER	LinJ.07.0980-LinJ.07.0990	LinJ.07.0980-LinJ.07.0990	intergenic_region	LinJ.07.0980-LinJ.07.0990	n.414595C>T
LinJ.07	414673	.	T	C	.	.	ANN=C	intergenic_region	MODIFIER	LinJ.07.0980-LinJ.07.0990	LinJ.07.0980-LinJ.07.0990	intergenic_region	LinJ.07.0980-LinJ.07.0990	n.414673T>C
LinJ.07	414772	.	C	T	.	.	ANN=T	intergenic_region	MODIFIER	LinJ.07.0980-LinJ.07.0990	LinJ.07.0980-LinJ.07.0990	intergenic_region	LinJ.07.0980-LinJ.07.0990	n.414772C>T
LinJ.07	414889	.	C	T	.	.	ANN=T	intergenic_region	MODIFIER	LinJ.07.0980-LinJ.07.0990	LinJ.07.0980-LinJ.07.0990	intergenic_region	LinJ.07.0980-LinJ.07.0990	n.414889C>T
LinJ.07	415038	.	C	A	.	.	ANN=A	intergenic_region	MODIFIER	LinJ.07.0980-LinJ.07.0990	LinJ.07.0980-LinJ.07.0990	intergenic_region	LinJ.07.0980-LinJ.07.0990	n.415038C>A
LinJ.07	415070	.	A	C	.	.	ANN=C	intergenic_region	MODIFIER	LinJ.07.0980-LinJ.07.0990	LinJ.07.0980-LinJ.07.0990	intergenic_region	LinJ.07.0980-LinJ.07.0990	n.415070A>C
LinJ.07	415114	.	G	C	.	.	ANN=C	intergenic_region	MODIFIER	LinJ.07.0980-LinJ.07.0990	LinJ.07.0980-LinJ.07.0990	intergenic_region	LinJ.07.0980-LinJ.07.0990	n.415114G>C
LinJ.07	415609	.	C	T	.	.	ANN=T	intergenic_region	MODIFIER	LinJ.07.0980-LinJ.07.0990	LinJ.07.0980-LinJ.07.0990	intergenic_region	LinJ.07.0980-LinJ.07.0990	n.415609C>T
LinJ.07	415756	.	T	C	.	.	ANN=C	intergenic_region	MODIFIER	LinJ.07.0980-LinJ.07.0990	LinJ.07.0980-LinJ.07.0990	intergenic_region	LinJ.07.0980-LinJ.07.0990	n.415756T>C
LinJ.07	415912	.	C	T	.	.	ANN=T	intergenic_region	MODIFIER	LinJ.07.0980-LinJ.07.0990	LinJ.07.0980-LinJ.07.0990	intergenic_region	LinJ.07.0980-LinJ.07.0990	n.415912C>T
LinJ.07	415925	.	T	G	.	.	ANN=G	intergenic_region	MODIFIER	LinJ.07.0980-LinJ.07.0990	LinJ.07.0980-LinJ.07.0990	intergenic_region	LinJ.07.0980-LinJ.07.0990	n.415925T>G
LinJ.07	416015	.	C	A	.	.	ANN=A	intergenic_region	MODIFIER	LinJ.07.0980-LinJ.07.0990	LinJ.07.0980-LinJ.07.0990	intergenic_region	LinJ.07.0980-LinJ.07.0990	n.416015C>A
LinJ.07	416603	.	T	C	.	.	ANN=C	intergenic_region	MODIFIER	LinJ.07.0980-LinJ.07.0990	LinJ.07.0980-LinJ.07.0990	intergenic_region	LinJ.07.0980-LinJ.07.0990	n.416603T>C
LinJ.07	416738	.	C	T	.	.	ANN=T	intergenic_region	MODIFIER	LinJ.07.0980-LinJ.07.0990	LinJ.07.0980-LinJ.07.0990	intergenic_region	LinJ.07.0980-LinJ.07.0990	n.416738C>T
LinJ.07	417171	.	C	G	.	.	ANN=G	intergenic_region	MODIFIER	LinJ.07.0980-LinJ.07.0990	LinJ.07.0980-LinJ.07.0990	intergenic_region	LinJ.07.0980-LinJ.07.0990	n.417171C>G
LinJ.07	417873	.	T	C	.	.	ANN=C	intergenic_region	MODIFIER	LinJ.07.0980-LinJ.07.0990	LinJ.07.0980-LinJ.07.0990	intergenic_region	LinJ.07.0980-LinJ.07.0990	n.417873T>C
LinJ.07	418335	.	T	A	.	.	ANN=A	intergenic_region	MODIFIER	LinJ.07.0980-LinJ.07.0990	LinJ.07.0980-LinJ.07.0990	intergenic_region	LinJ.07.0980-LinJ.07.0990	n.418335T>A
LinJ.07	418635	.	T	C	.	.	ANN=C	intergenic_region	MODIFIER	LinJ.07.0980-LinJ.07.0990	LinJ.07.0980-LinJ.07.0990	intergenic_region	LinJ.07.0980-LinJ.07.0990	n.418635T>C
LinJ.07	418640	.	A	C	.	.	ANN=C	intergenic_region	MODIFIER	LinJ.07.0980-LinJ.07.0990	LinJ.07.0980-LinJ.07.0990	intergenic_region	LinJ.07.0980-LinJ.07.0990	n.418640A>C
LinJ.07	418890	.	T	C	.	.	ANN=C	intergenic_region	MODIFIER	LinJ.07.0980-LinJ.07.0990	LinJ.07.0980-LinJ.07.0990	intergenic_region	LinJ.07.0980-LinJ.07.0990	n.418890T>C
LinJ.07	481461	.	C	T	.	.	ANN=T	missense_variant	MODERATE	LinJ.07.1070	LinJ.07.1070	transcript	LinJ.07.1070:mRNA	protein_coding	2019-01-01	c.3176C>T	p.Ala1059Val	3176/7710	3176/7710	1059/2569
LinJ.07	486288	.	A	C	.	.	ANN=C	intergenic_region	MODIFIER	LinJ.07.1070-LinJ.07.1080	LinJ.07.1070-LinJ.07.1080	intergenic_region	LinJ.07.1070-LinJ.07.1080	n.486288A>C
LinJ.07	486512	.	A	T	.	.	ANN=T	intergenic_region	MODIFIER	LinJ.07.1070-LinJ.07.1080	LinJ.07.1070-LinJ.07.1080	intergenic_region	LinJ.07.1070-LinJ.07.1080	n.486512A>T
LinJ.07	486570	.	C	T	.	.	ANN=T	intergenic_region	MODIFIER	LinJ.07.1070-LinJ.07.1080	LinJ.07.1070-LinJ.07.1080	intergenic_region	LinJ.07.1070-LinJ.07.1080	n.486570C>T
LinJ.07	486611	.	T	C	.	.	ANN=C	intergenic_region	MODIFIER	LinJ.07.1070-LinJ.07.1080	LinJ.07.1070-LinJ.07.1080	intergenic_region	LinJ.07.1070-LinJ.07.1080	n.486611T>C
LinJ.07	486687	.	C	T	.	.	ANN=T	intergenic_region	MODIFIER	LinJ.07.1070-LinJ.07.1080	LinJ.07.1070-LinJ.07.1080	intergenic_region	LinJ.07.1070-LinJ.07.1080	n.486687C>T
LinJ.07	487433	.	C	T	.	.	ANN=T	synonymous_variant	LOW	LinJ.07.1080	LinJ.07.1080	transcript	LinJ.07.1080:mRNA	protein_coding	2019-01-01	c.702C>T	p.Phe234Phe	702/1014	702/1014	234/337
LinJ.07	488723	.	C	G	.	.	ANN=G	intergenic_region	MODIFIER	LinJ.07.1080-LinJ.07.1090	LinJ.07.1080-LinJ.07.1090	intergenic_region	LinJ.07.1080-LinJ.07.1090	n.488723C>G
LinJ.07	488911	.	C	G	.	.	ANN=G	intergenic_region	MODIFIER	LinJ.07.1080-LinJ.07.1090	LinJ.07.1080-LinJ.07.1090	intergenic_region	LinJ.07.1080-LinJ.07.1090	n.488911C>G
LinJ.07	490017	.	G	A	.	.	ANN=A	synonymous_variant	LOW	LinJ.07.1090	LinJ.07.1090	transcript	LinJ.07.1090:mRNA	protein_coding	2019-01-01	c.309G>A	p.Glu103Glu	309/7347	309/7347	103/2448
LinJ.07	493907	.	T	G	.	.	ANN=G	missense_variant	MODERATE	LinJ.07.1090	LinJ.07.1090	transcript	LinJ.07.1090:mRNA	protein_coding	2019-01-01	c.4199T>G	p.Leu1400Arg	4199/7347	4199/7347	1400/2448
LinJ.07	499578	.	G	C	.	.	ANN=C	intergenic_region	MODIFIER	LinJ.07.1090-LinJ.07.1100	LinJ.07.1090-LinJ.07.1100	intergenic_region	LinJ.07.1090-LinJ.07.1100	n.499578G>C
LinJ.07	500408	.	G	C	.	.	ANN=C	missense_variant	MODERATE	LinJ.07.1100	LinJ.07.1100	transcript	LinJ.07.1100:mRNA	protein_coding	2019-01-01	c.731G>C	p.Cys244Ser	731/7383	731/7383	244/2460
LinJ.07	503714	.	C	A	.	.	ANN=A	missense_variant	MODERATE	LinJ.07.1100	LinJ.07.1100	transcript	LinJ.07.1100:mRNA	protein_coding	2019-01-01	c.4037C>A	p.Pro1346Gln	4037/7383	4037/7383	1346/2460
LinJ.07	506939	.	A	G	.	.	ANN=G	missense_variant	MODERATE	LinJ.07.1100	LinJ.07.1100	transcript	LinJ.07.1100:mRNA	protein_coding	2019-01-01	c.7262A>G	p.Gln2421Arg	7262/7383	7262/7383	2421/2460
LinJ.07	507091	.	A	G	.	.	ANN=G	intergenic_region	MODIFIER	LinJ.07.1100-LinJ.07.1110	LinJ.07.1100-LinJ.07.1110	intergenic_region	LinJ.07.1100-LinJ.07.1110	n.507091A>G
LinJ.07	507205	.	A	G	.	.	ANN=G	intergenic_region	MODIFIER	LinJ.07.1100-LinJ.07.1110	LinJ.07.1100-LinJ.07.1110	intergenic_region	LinJ.07.1100-LinJ.07.1110	n.507205A>G
LinJ.07	507245	.	C	T	.	.	ANN=T	intergenic_region	MODIFIER	LinJ.07.1100-LinJ.07.1110	LinJ.07.1100-LinJ.07.1110	intergenic_region	LinJ.07.1100-LinJ.07.1110	n.507245C>T
LinJ.07	520101	.	T	G	.	.	ANN=G	intergenic_region	MODIFIER	LinJ.07.1140-LinJ.07.1150	LinJ.07.1140-LinJ.07.1150	intergenic_region	LinJ.07.1140-LinJ.07.1150	n.520101T>G
LinJ.07	521468	.	G	T	.	.	ANN=T	intergenic_region	MODIFIER	LinJ.07.1140-LinJ.07.1150	LinJ.07.1140-LinJ.07.1150	intergenic_region	LinJ.07.1140-LinJ.07.1150	n.521468G>T
LinJ.07	524889	.	T	C	.	.	ANN=C	intergenic_region	MODIFIER	LinJ.07.1150-LinJ.07.1160	LinJ.07.1150-LinJ.07.1160	intergenic_region	LinJ.07.1150-LinJ.07.1160	n.524889T>C
LinJ.07	525110	.	G	A	.	.	ANN=A	intergenic_region	MODIFIER	LinJ.07.1150-LinJ.07.1160	LinJ.07.1150-LinJ.07.1160	intergenic_region	LinJ.07.1150-LinJ.07.1160	n.525110G>A
LinJ.07	525119	.	T	C	.	.	ANN=C	intergenic_region	MODIFIER	LinJ.07.1150-LinJ.07.1160	LinJ.07.1150-LinJ.07.1160	intergenic_region	LinJ.07.1150-LinJ.07.1160	n.525119T>C
LinJ.07	526156	.	G	A	.	.	ANN=A	intergenic_region	MODIFIER	LinJ.07.1160-LinJ.07.1170	LinJ.07.1160-LinJ.07.1170	intergenic_region	LinJ.07.1160-LinJ.07.1170	n.526156G>A
LinJ.07	526379	.	G	A	.	.	ANN=A	intergenic_region	MODIFIER	LinJ.07.1160-LinJ.07.1170	LinJ.07.1160-LinJ.07.1170	intergenic_region	LinJ.07.1160-LinJ.07.1170	n.526379G>A
LinJ.07	526882	.	A	C	.	.	ANN=C	intergenic_region	MODIFIER	LinJ.07.1160-LinJ.07.1170	LinJ.07.1160-LinJ.07.1170	intergenic_region	LinJ.07.1160-LinJ.07.1170	n.526882A>C
LinJ.07	526894	.	A	G	.	.	ANN=G	intergenic_region	MODIFIER	LinJ.07.1160-LinJ.07.1170	LinJ.07.1160-LinJ.07.1170	intergenic_region	LinJ.07.1160-LinJ.07.1170	n.526894A>G
LinJ.07	526898	.	A	C	.	.	ANN=C	intergenic_region	MODIFIER	LinJ.07.1160-LinJ.07.1170	LinJ.07.1160-LinJ.07.1170	intergenic_region	LinJ.07.1160-LinJ.07.1170	n.526898A>C
LinJ.07	527540	.	A	G	.	.	ANN=G	synonymous_variant	LOW	LinJ.07.1170	LinJ.07.1170	transcript	LinJ.07.1170:mRNA	protein_coding	2019-01-01	c.303A>G	p.Thr101Thr	303/3660	303/3660	101/1219
LinJ.07	527910	.	G	A	.	.	ANN=A	missense_variant	MODERATE	LinJ.07.1170	LinJ.07.1170	transcript	LinJ.07.1170:mRNA	protein_coding	2019-01-01	c.673G>A	p.Asp225Asn	673/3660	673/3660	225/1219
LinJ.07	528023	.	T	C	.	.	ANN=C	synonymous_variant	LOW	LinJ.07.1170	LinJ.07.1170	transcript	LinJ.07.1170:mRNA	protein_coding	2019-01-01	c.786T>C	p.Ala262Ala	786/3660	786/3660	262/1219
LinJ.07	528134	.	T	G	.	.	ANN=G	synonymous_variant	LOW	LinJ.07.1170	LinJ.07.1170	transcript	LinJ.07.1170:mRNA	protein_coding	2019-01-01	c.897T>G	p.Thr299Thr	897/3660	897/3660	299/1219
LinJ.07	528717	.	A	G	.	.	ANN=G	missense_variant	MODERATE	LinJ.07.1170	LinJ.07.1170	transcript	LinJ.07.1170:mRNA	protein_coding	2019-01-01	c.1480A>G	p.Met494Val	1480/3660	1480/3660	494/1219
LinJ.07	528728	.	C	G	.	.	ANN=G	synonymous_variant	LOW	LinJ.07.1170	LinJ.07.1170	transcript	LinJ.07.1170:mRNA	protein_coding	2019-01-01	c.1491C>G	p.Val497Val	1491/3660	1491/3660	497/1219
LinJ.07	528761	.	A	G	.	.	ANN=G	synonymous_variant	LOW	LinJ.07.1170	LinJ.07.1170	transcript	LinJ.07.1170:mRNA	protein_coding	2019-01-01	c.1524A>G	p.Glu508Glu	1524/3660	1524/3660	508/1219
LinJ.07	529139	.	C	G	.	.	ANN=G	synonymous_variant	LOW	LinJ.07.1170	LinJ.07.1170	transcript	LinJ.07.1170:mRNA	protein_coding	2019-01-01	c.1902C>G	p.Leu634Leu	1902/3660	1902/3660	634/1219
LinJ.07	529198	.	A	C	.	.	ANN=C	missense_variant	MODERATE	LinJ.07.1170	LinJ.07.1170	transcript	LinJ.07.1170:mRNA	protein_coding	2019-01-01	c.1961A>C	p.Lys654Thr	1961/3660	1961/3660	654/1219
LinJ.07	529793	.	T	C	.	.	ANN=C	synonymous_variant	LOW	LinJ.07.1170	LinJ.07.1170	transcript	LinJ.07.1170:mRNA	protein_coding	2019-01-01	c.2556T>C	p.Asp852Asp	2556/3660	2556/3660	852/1219
LinJ.07	529861	.	C	G	.	.	ANN=G	missense_variant	MODERATE	LinJ.07.1170	LinJ.07.1170	transcript	LinJ.07.1170:mRNA	protein_coding	2019-01-01	c.2624C>G	p.Pro875Arg	2624/3660	2624/3660	875/1219
LinJ.07	530282	.	T	G	.	.	ANN=G	synonymous_variant	LOW	LinJ.07.1170	LinJ.07.1170	transcript	LinJ.07.1170:mRNA	protein_coding	2019-01-01	c.3045T>G	p.Thr1015Thr	3045/3660	3045/3660	1015/1219
LinJ.07	530933	.	G	C	.	.	ANN=C	intergenic_region	MODIFIER	LinJ.07.1170-LinJ.07.1180	LinJ.07.1170-LinJ.07.1180	intergenic_region	LinJ.07.1170-LinJ.07.1180	n.530933G>C
LinJ.07	530972	.	G	C	.	.	ANN=C	intergenic_region	MODIFIER	LinJ.07.1170-LinJ.07.1180	LinJ.07.1170-LinJ.07.1180	intergenic_region	LinJ.07.1170-LinJ.07.1180	n.530972G>C
LinJ.07	531013	.	G	T	.	.	ANN=T	intergenic_region	MODIFIER	LinJ.07.1170-LinJ.07.1180	LinJ.07.1170-LinJ.07.1180	intergenic_region	LinJ.07.1170-LinJ.07.1180	n.531013G>T
LinJ.07	531425	.	A	G	.	.	ANN=G	intergenic_region	MODIFIER	LinJ.07.1170-LinJ.07.1180	LinJ.07.1170-LinJ.07.1180	intergenic_region	LinJ.07.1170-LinJ.07.1180	n.531425A>G
LinJ.07	531605	.	T	C	.	.	ANN=C	intergenic_region	MODIFIER	LinJ.07.1170-LinJ.07.1180	LinJ.07.1170-LinJ.07.1180	intergenic_region	LinJ.07.1170-LinJ.07.1180	n.531605T>C
LinJ.07	531671	.	T	C	.	.	ANN=C	intergenic_region	MODIFIER	LinJ.07.1170-LinJ.07.1180	LinJ.07.1170-LinJ.07.1180	intergenic_region	LinJ.07.1170-LinJ.07.1180	n.531671T>C
LinJ.07	531832	.	T	C	.	.	ANN=C	intergenic_region	MODIFIER	LinJ.07.1170-LinJ.07.1180	LinJ.07.1170-LinJ.07.1180	intergenic_region	LinJ.07.1170-LinJ.07.1180	n.531832T>C
LinJ.07	532334	.	A	G	.	.	ANN=G	intergenic_region	MODIFIER	LinJ.07.1180-LinJ.07.1190	LinJ.07.1180-LinJ.07.1190	intergenic_region	LinJ.07.1180-LinJ.07.1190	n.532334A>G
LinJ.07	532441	.	T	C	.	.	ANN=C	intergenic_region	MODIFIER	LinJ.07.1180-LinJ.07.1190	LinJ.07.1180-LinJ.07.1190	intergenic_region	LinJ.07.1180-LinJ.07.1190	n.532441T>C
LinJ.07	532442	.	T	G	.	.	ANN=G	intergenic_region	MODIFIER	LinJ.07.1180-LinJ.07.1190	LinJ.07.1180-LinJ.07.1190	intergenic_region	LinJ.07.1180-LinJ.07.1190	n.532442T>G
LinJ.07	532504	.	G	C	.	.	ANN=C	intergenic_region	MODIFIER	LinJ.07.1180-LinJ.07.1190	LinJ.07.1180-LinJ.07.1190	intergenic_region	LinJ.07.1180-LinJ.07.1190	n.532504G>C
LinJ.07	533174	.	A	C	.	.	ANN=C	intergenic_region	MODIFIER	LinJ.07.1180-LinJ.07.1190	LinJ.07.1180-LinJ.07.1190	intergenic_region	LinJ.07.1180-LinJ.07.1190	n.533174A>C
LinJ.07	533189	.	G	C	.	.	ANN=C	intergenic_region	MODIFIER	LinJ.07.1180-LinJ.07.1190	LinJ.07.1180-LinJ.07.1190	intergenic_region	LinJ.07.1180-LinJ.07.1190	n.533189G>C
LinJ.07	533410	.	T	C	.	.	ANN=C	intergenic_region	MODIFIER	LinJ.07.1180-LinJ.07.1190	LinJ.07.1180-LinJ.07.1190	intergenic_region	LinJ.07.1180-LinJ.07.1190	n.533410T>C
LinJ.07	533810	.	T	C	.	.	ANN=C	intergenic_region	MODIFIER	LinJ.07.1180-LinJ.07.1190	LinJ.07.1180-LinJ.07.1190	intergenic_region	LinJ.07.1180-LinJ.07.1190	n.533810T>C
LinJ.07	533932	.	C	T	.	.	ANN=T	intergenic_region	MODIFIER	LinJ.07.1180-LinJ.07.1190	LinJ.07.1180-LinJ.07.1190	intergenic_region	LinJ.07.1180-LinJ.07.1190	n.533932C>T
LinJ.07	534037	.	G	A	.	.	ANN=A	intergenic_region	MODIFIER	LinJ.07.1180-LinJ.07.1190	LinJ.07.1180-LinJ.07.1190	intergenic_region	LinJ.07.1180-LinJ.07.1190	n.534037G>A
LinJ.07	534151	.	G	T	.	.	ANN=T	intergenic_region	MODIFIER	LinJ.07.1180-LinJ.07.1190	LinJ.07.1180-LinJ.07.1190	intergenic_region	LinJ.07.1180-LinJ.07.1190	n.534151G>T
LinJ.07	534216	.	G	A	.	.	ANN=A	intergenic_region	MODIFIER	LinJ.07.1180-LinJ.07.1190	LinJ.07.1180-LinJ.07.1190	intergenic_region	LinJ.07.1180-LinJ.07.1190	n.534216G>A
LinJ.07	534756	.	T	C	.	.	ANN=C	intergenic_region	MODIFIER	LinJ.07.1180-LinJ.07.1190	LinJ.07.1180-LinJ.07.1190	intergenic_region	LinJ.07.1180-LinJ.07.1190	n.534756T>C
LinJ.07	535827	.	C	T	.	.	ANN=T	missense_variant	MODERATE	LinJ.07.1190	LinJ.07.1190	transcript	LinJ.07.1190:mRNA	protein_coding	2019-01-01	c.263C>T	p.Ala88Val	263/612	263/612	88/203
LinJ.07	537452	.	A	G	.	.	ANN=G	missense_variant	MODERATE	LinJ.07.1200	LinJ.07.1200	transcript	LinJ.07.1200:mRNA	protein_coding	2019-01-01	c.88A>G	p.Arg30Gly	88/975	88/975	30/324
LinJ.07	541069	.	G	C	.	.	ANN=C	missense_variant	MODERATE	LinJ.07.1210	LinJ.07.1210	transcript	LinJ.07.1210:mRNA	protein_coding	2019-01-01	c.1729G>C	p.Ala577Pro	1729/3735	1729/3735	577/1244
LinJ.07	544320	.	C	T	.	.	ANN=T	intergenic_region	MODIFIER	LinJ.07.1210-LinJ.07.1220	LinJ.07.1210-LinJ.07.1220	intergenic_region	LinJ.07.1210-LinJ.07.1220	n.544320C>T
LinJ.07	546733	.	G	T	.	.	ANN=T	intergenic_region	MODIFIER	LinJ.07.1220-LinJ.07.1230	LinJ.07.1220-LinJ.07.1230	intergenic_region	LinJ.07.1220-LinJ.07.1230	n.546733G>T
LinJ.07	547499	.	T	G	.	.	ANN=G	missense_variant	MODERATE	LinJ.07.1230	LinJ.07.1230	transcript	LinJ.07.1230:mRNA	protein_coding	2019-01-01	c.739T>G	p.Ser247Ala	739/1014	739/1014	247/337
LinJ.07	548111	.	G	A	.	.	ANN=A	intergenic_region	MODIFIER	LinJ.07.1230-LinJ.07.1240	LinJ.07.1230-LinJ.07.1240	intergenic_region	LinJ.07.1230-LinJ.07.1240	n.548111G>A
LinJ.07	549577	.	G	A	.	.	ANN=A	synonymous_variant	LOW	LinJ.07.1240	LinJ.07.1240	transcript	LinJ.07.1240:mRNA	protein_coding	2019-01-01	c.1251G>A	p.Gly417Gly	1251/1353	1251/1353	417/450
LinJ.07	551767	.	G	C	.	.	ANN=C	synonymous_variant	LOW	LinJ.07.1250	LinJ.07.1250	transcript	LinJ.07.1250:mRNA	protein_coding	2019-01-01	c.513G>C	p.Val171Val	513/2520	513/2520	171/839
LinJ.07	557079	.	C	T	.	.	ANN=T	intergenic_region	MODIFIER	LinJ.07.1260-LinJ.07.1270	LinJ.07.1260-LinJ.07.1270	intergenic_region	LinJ.07.1260-LinJ.07.1270	n.557079C>T
LinJ.07	573352	.	C	T	.	.	ANN=T	intergenic_region	MODIFIER	LinJ.07.1320-LinJ.07.1330	LinJ.07.1320-LinJ.07.1330	intergenic_region	LinJ.07.1320-LinJ.07.1330	n.573352C>T
LinJ.07	573891	.	T	A	.	.	ANN=A	intergenic_region	MODIFIER	LinJ.07.1320-LinJ.07.1330	LinJ.07.1320-LinJ.07.1330	intergenic_region	LinJ.07.1320-LinJ.07.1330	n.573891T>A
LinJ.07	576466	.	A	G	.	.	ANN=G	synonymous_variant	LOW	LinJ.07.1330	LinJ.07.1330	transcript	LinJ.07.1330:mRNA	protein_coding	2019-01-01	c.1608A>G	p.Lys536Lys	1608/7629	1608/7629	536/2542
LinJ.07	577651	.	T	C	.	.	ANN=C	synonymous_variant	LOW	LinJ.07.1330	LinJ.07.1330	transcript	LinJ.07.1330:mRNA	protein_coding	2019-01-01	c.2793T>C	p.Arg931Arg	2793/7629	2793/7629	931/2542
LinJ.07	578776	.	A	G	.	.	ANN=G	synonymous_variant	LOW	LinJ.07.1330	LinJ.07.1330	transcript	LinJ.07.1330:mRNA	protein_coding	2019-01-01	c.3918A>G	p.Ala1306Ala	3918/7629	3918/7629	1306/2542
LinJ.07	581959	.	C	T	.	.	ANN=T	synonymous_variant	LOW	LinJ.07.1330	LinJ.07.1330	transcript	LinJ.07.1330:mRNA	protein_coding	2019-01-01	c.7101C>T	p.Thr2367Thr	7101/7629	7101/7629	2367/2542
LinJ.07	582217	.	C	G	.	.	ANN=G	synonymous_variant	LOW	LinJ.07.1330	LinJ.07.1330	transcript	LinJ.07.1330:mRNA	protein_coding	2019-01-01	c.7359C>G	p.Leu2453Leu	7359/7629	7359/7629	2453/2542
LinJ.07	583557	.	C	G	.	.	ANN=G	missense_variant	MODERATE	LinJ.07.1340	LinJ.07.1340	transcript	LinJ.07.1340:mRNA	protein_coding	2019-01-01	c.271C>G	p.Leu91Val	271/1476	271/1476	91/491
LinJ.07	583686	.	G	T	.	.	ANN=T	missense_variant	MODERATE	LinJ.07.1340	LinJ.07.1340	transcript	LinJ.07.1340:mRNA	protein_coding	2019-01-01	c.400G>T	p.Val134Leu	400/1476	400/1476	134/491
LinJ.07	585250	.	A	G	.	.	ANN=G	intergenic_region	MODIFIER
LinJ.07	585968	.	C	A	.	.	ANN=A	intergenic_region	MODIFIER
LinJ.07	586635	.	A	G	.	.	ANN=G	intergenic_region	MODIFIER
LinJ.07	587486	.	A	G	.	.	ANN=G	intergenic_region	MODIFIER
LinJ.07	589034	.	T	C	.	.	ANN=C	intergenic_region	MODIFIER
LinJ.07	589442	.	T	C	.	.	ANN=C	intergenic_region	MODIFIER
LinJ.08	6867	.	A	G	.	.	ANN=G	synonymous_variant	LOW	LinJ.08.0010	LinJ.08.0010	transcript	LinJ.08.0010:mRNA	protein_coding	2019-01-01	c.2076A>G	p.Ala692Ala	2076/3597	2076/3597	692/1198
LinJ.08	11624	.	A	G	.	.	ANN=G	synonymous_variant	LOW	LinJ.08.0030	LinJ.08.0030	transcript	LinJ.08.0030:mRNA	protein_coding	2019-01-01	c.375A>G	p.Thr125Thr	375/648	375/648	125/215
LinJ.08	12400	.	T	G	.	.	ANN=G	intergenic_region	MODIFIER	LinJ.08.0030-LinJ.08.0040	LinJ.08.0030-LinJ.08.0040	intergenic_region	LinJ.08.0030-LinJ.08.0040	n.12400T>G
LinJ.08	14096	.	G	T	.	.	ANN=T	synonymous_variant	LOW	LinJ.08.0040	LinJ.08.0040	transcript	LinJ.08.0040:mRNA	protein_coding	2019-01-01	c.447G>T	p.Ala149Ala	447/690	447/690	149/229
LinJ.08	15112	.	A	G	.	.	ANN=G	intergenic_region	MODIFIER	LinJ.08.0040-LinJ.08.0050	LinJ.08.0040-LinJ.08.0050	intergenic_region	LinJ.08.0040-LinJ.08.0050	n.15112A>G
LinJ.08	15401	.	A	G	.	.	ANN=G	intergenic_region	MODIFIER	LinJ.08.0040-LinJ.08.0050	LinJ.08.0040-LinJ.08.0050	intergenic_region	LinJ.08.0040-LinJ.08.0050	n.15401A>G
LinJ.08	15454	.	A	G	.	.	ANN=G	synonymous_variant	LOW	LinJ.08.0050	LinJ.08.0050	transcript	LinJ.08.0050:mRNA	protein_coding	2019-01-01	c.36A>G	p.Thr12Thr	36/228	36/228	1975-12-01
LinJ.08	16007	.	G	T	.	.	ANN=T	intergenic_region	MODIFIER	LinJ.08.0050-LinJ.08.0060	LinJ.08.0050-LinJ.08.0060	intergenic_region	LinJ.08.0050-LinJ.08.0060	n.16007G>T
LinJ.08	16243	.	C	G	.	.	ANN=G	intergenic_region	MODIFIER	LinJ.08.0050-LinJ.08.0060	LinJ.08.0050-LinJ.08.0060	intergenic_region	LinJ.08.0050-LinJ.08.0060	n.16243C>G
LinJ.08	17520	.	A	G	.	.	ANN=G	missense_variant	MODERATE	LinJ.08.0060	LinJ.08.0060	transcript	LinJ.08.0060:mRNA	protein_coding	2019-01-01	c.314A>G	p.Lys105Arg	314/558	314/558	105/185
LinJ.08	18319	.	T	C	.	.	ANN=C	intergenic_region	MODIFIER	LinJ.08.0060-LinJ.08.0070	LinJ.08.0060-LinJ.08.0070	intergenic_region	LinJ.08.0060-LinJ.08.0070	n.18319T>C
LinJ.08	23072	.	A	C	.	.	ANN=C	synonymous_variant	LOW	LinJ.08.0080	LinJ.08.0080	transcript	LinJ.08.0080:mRNA	protein_coding	2019-01-01	c.1372A>C	p.Arg458Arg	1372/2058	1372/2058	458/685
LinJ.08	23972	.	T	C	.	.	ANN=C	intergenic_region	MODIFIER	LinJ.08.0080-LinJ.08.0090	LinJ.08.0080-LinJ.08.0090	intergenic_region	LinJ.08.0080-LinJ.08.0090	n.23972T>C
LinJ.08	23982	.	G	A	.	.	ANN=A	intergenic_region	MODIFIER	LinJ.08.0080-LinJ.08.0090	LinJ.08.0080-LinJ.08.0090	intergenic_region	LinJ.08.0080-LinJ.08.0090	n.23982G>A
LinJ.08	24013	.	G	C	.	.	ANN=C	intergenic_region	MODIFIER	LinJ.08.0080-LinJ.08.0090	LinJ.08.0080-LinJ.08.0090	intergenic_region	LinJ.08.0080-LinJ.08.0090	n.24013G>C
LinJ.08	24018	.	G	T	.	.	ANN=T	intergenic_region	MODIFIER	LinJ.08.0080-LinJ.08.0090	LinJ.08.0080-LinJ.08.0090	intergenic_region	LinJ.08.0080-LinJ.08.0090	n.24018G>T
LinJ.08	24057	.	G	A	.	.	ANN=A	intergenic_region	MODIFIER	LinJ.08.0080-LinJ.08.0090	LinJ.08.0080-LinJ.08.0090	intergenic_region	LinJ.08.0080-LinJ.08.0090	n.24057G>A
LinJ.08	24495	.	A	G	.	.	ANN=G	intergenic_region	MODIFIER	LinJ.08.0080-LinJ.08.0090	LinJ.08.0080-LinJ.08.0090	intergenic_region	LinJ.08.0080-LinJ.08.0090	n.24495A>G
LinJ.08	24616	.	T	C	.	.	ANN=C	intergenic_region	MODIFIER	LinJ.08.0080-LinJ.08.0090	LinJ.08.0080-LinJ.08.0090	intergenic_region	LinJ.08.0080-LinJ.08.0090	n.24616T>C
LinJ.08	25801	.	C	G	.	.	ANN=G	missense_variant	MODERATE	LinJ.08.0090	LinJ.08.0090	transcript	LinJ.08.0090:mRNA	protein_coding	2019-01-01	c.809C>G	p.Thr270Ser	809/3402	809/3402	270/1133
LinJ.08	28541	.	T	C	.	.	ANN=C	intergenic_region	MODIFIER	LinJ.08.0090-LinJ.08.0100	LinJ.08.0090-LinJ.08.0100	intergenic_region	LinJ.08.0090-LinJ.08.0100	n.28541T>C
LinJ.08	29899	.	A	G	.	.	ANN=G	intergenic_region	MODIFIER	LinJ.08.0090-LinJ.08.0100	LinJ.08.0090-LinJ.08.0100	intergenic_region	LinJ.08.0090-LinJ.08.0100	n.29899A>G
LinJ.08	30685	.	A	C	.	.	ANN=C	missense_variant	MODERATE	LinJ.08.0100	LinJ.08.0100	transcript	LinJ.08.0100:mRNA	protein_coding	2019-01-01	c.369A>C	p.Arg123Ser	369/1356	369/1356	123/451
LinJ.08	31782	.	G	C	.	.	ANN=C	intergenic_region	MODIFIER	LinJ.08.0100-LinJ.08.0110	LinJ.08.0100-LinJ.08.0110	intergenic_region	LinJ.08.0100-LinJ.08.0110	n.31782G>C
LinJ.08	31988	.	C	G	.	.	ANN=G	intergenic_region	MODIFIER	LinJ.08.0100-LinJ.08.0110	LinJ.08.0100-LinJ.08.0110	intergenic_region	LinJ.08.0100-LinJ.08.0110	n.31988C>G
LinJ.08	32201	.	G	A	.	.	ANN=A	intergenic_region	MODIFIER	LinJ.08.0100-LinJ.08.0110	LinJ.08.0100-LinJ.08.0110	intergenic_region	LinJ.08.0100-LinJ.08.0110	n.32201G>A
LinJ.08	33422	.	T	G	.	.	ANN=G	synonymous_variant	LOW	LinJ.08.0110	LinJ.08.0110	transcript	LinJ.08.0110:mRNA	protein_coding	2019-01-01	c.717T>G	p.Ala239Ala	717/1932	717/1932	239/643
LinJ.08	34673	.	G	A	.	.	ANN=A	intergenic_region	MODIFIER	LinJ.08.0110-LinJ.08.0120	LinJ.08.0110-LinJ.08.0120	intergenic_region	LinJ.08.0110-LinJ.08.0120	n.34673G>A
LinJ.08	35968	.	C	T	.	.	ANN=T	intergenic_region	MODIFIER	LinJ.08.0110-LinJ.08.0120	LinJ.08.0110-LinJ.08.0120	intergenic_region	LinJ.08.0110-LinJ.08.0120	n.35968C>T
LinJ.08	40935	.	T	C	.	.	ANN=C	synonymous_variant	LOW	LinJ.08.0130	LinJ.08.0130	transcript	LinJ.08.0130:mRNA	protein_coding	2019-01-01	c.2259T>C	p.Gly753Gly	2259/3453	2259/3453	753/1150
LinJ.08	41281	.	C	T	.	.	ANN=T	missense_variant	MODERATE	LinJ.08.0130	LinJ.08.0130	transcript	LinJ.08.0130:mRNA	protein_coding	2019-01-01	c.2605C>T	p.Arg869Cys	2605/3453	2605/3453	869/1150
LinJ.08	41319	.	T	A	.	.	ANN=A	synonymous_variant	LOW	LinJ.08.0130	LinJ.08.0130	transcript	LinJ.08.0130:mRNA	protein_coding	2019-01-01	c.2643T>A	p.Arg881Arg	2643/3453	2643/3453	881/1150
LinJ.08	41632	.	A	G	.	.	ANN=G	missense_variant	MODERATE	LinJ.08.0130	LinJ.08.0130	transcript	LinJ.08.0130:mRNA	protein_coding	2019-01-01	c.2956A>G	p.Met986Val	2956/3453	2956/3453	986/1150
LinJ.08	41760	.	T	C	.	.	ANN=C	synonymous_variant	LOW	LinJ.08.0130	LinJ.08.0130	transcript	LinJ.08.0130:mRNA	protein_coding	2019-01-01	c.3084T>C	p.Asn1028Asn	3084/3453	3084/3453	1028/1150
LinJ.08	41803	.	A	G	.	.	ANN=G	missense_variant	MODERATE	LinJ.08.0130	LinJ.08.0130	transcript	LinJ.08.0130:mRNA	protein_coding	2019-01-01	c.3127A>G	p.Ile1043Val	3127/3453	3127/3453	1043/1150
LinJ.08	41898	.	G	T	.	.	ANN=T	synonymous_variant	LOW	LinJ.08.0130	LinJ.08.0130	transcript	LinJ.08.0130:mRNA	protein_coding	2019-01-01	c.3222G>T	p.Ala1074Ala	3222/3453	3222/3453	1074/1150
LinJ.08	42027	.	A	G	.	.	ANN=G	synonymous_variant	LOW	LinJ.08.0130	LinJ.08.0130	transcript	LinJ.08.0130:mRNA	protein_coding	2019-01-01	c.3351A>G	p.Ala1117Ala	3351/3453	3351/3453	1117/1150
LinJ.08	42050	.	C	T	.	.	ANN=T	missense_variant	MODERATE	LinJ.08.0130	LinJ.08.0130	transcript	LinJ.08.0130:mRNA	protein_coding	2019-01-01	c.3374C>T	p.Ala1125Val	3374/3453	3374/3453	1125/1150
LinJ.08	42133	.	T	A	.	.	ANN=A	intergenic_region	MODIFIER	LinJ.08.0130-LinJ.08.0140	LinJ.08.0130-LinJ.08.0140	intergenic_region	LinJ.08.0130-LinJ.08.0140	n.42133T>A
LinJ.08	42584	.	A	G	.	.	ANN=G	intergenic_region	MODIFIER	LinJ.08.0130-LinJ.08.0140	LinJ.08.0130-LinJ.08.0140	intergenic_region	LinJ.08.0130-LinJ.08.0140	n.42584A>G
LinJ.08	42699	.	G	T	.	.	ANN=T	intergenic_region	MODIFIER	LinJ.08.0130-LinJ.08.0140	LinJ.08.0130-LinJ.08.0140	intergenic_region	LinJ.08.0130-LinJ.08.0140	n.42699G>T
LinJ.08	42719	.	T	G	.	.	ANN=G	intergenic_region	MODIFIER	LinJ.08.0130-LinJ.08.0140	LinJ.08.0130-LinJ.08.0140	intergenic_region	LinJ.08.0130-LinJ.08.0140	n.42719T>G
LinJ.08	42741	.	T	C	.	.	ANN=C	intergenic_region	MODIFIER	LinJ.08.0130-LinJ.08.0140	LinJ.08.0130-LinJ.08.0140	intergenic_region	LinJ.08.0130-LinJ.08.0140	n.42741T>C
LinJ.08	42867	.	C	T	.	.	ANN=T	intergenic_region	MODIFIER	LinJ.08.0130-LinJ.08.0140	LinJ.08.0130-LinJ.08.0140	intergenic_region	LinJ.08.0130-LinJ.08.0140	n.42867C>T
LinJ.08	43086	.	A	G	.	.	ANN=G	intergenic_region	MODIFIER	LinJ.08.0130-LinJ.08.0140	LinJ.08.0130-LinJ.08.0140	intergenic_region	LinJ.08.0130-LinJ.08.0140	n.43086A>G
LinJ.08	43406	.	G	A	.	.	ANN=A	intergenic_region	MODIFIER	LinJ.08.0130-LinJ.08.0140	LinJ.08.0130-LinJ.08.0140	intergenic_region	LinJ.08.0130-LinJ.08.0140	n.43406G>A
LinJ.08	43671	.	A	G	.	.	ANN=G	intergenic_region	MODIFIER	LinJ.08.0130-LinJ.08.0140	LinJ.08.0130-LinJ.08.0140	intergenic_region	LinJ.08.0130-LinJ.08.0140	n.43671A>G
LinJ.08	43688	.	A	G	.	.	ANN=G	intergenic_region	MODIFIER	LinJ.08.0130-LinJ.08.0140	LinJ.08.0130-LinJ.08.0140	intergenic_region	LinJ.08.0130-LinJ.08.0140	n.43688A>G
LinJ.08	44069	.	A	T	.	.	ANN=T	intergenic_region	MODIFIER	LinJ.08.0130-LinJ.08.0140	LinJ.08.0130-LinJ.08.0140	intergenic_region	LinJ.08.0130-LinJ.08.0140	n.44069A>T
LinJ.08	44387	.	G	C	.	.	ANN=C	intergenic_region	MODIFIER	LinJ.08.0130-LinJ.08.0140	LinJ.08.0130-LinJ.08.0140	intergenic_region	LinJ.08.0130-LinJ.08.0140	n.44387G>C
LinJ.08	45015	.	T	C	.	.	ANN=C	synonymous_variant	LOW	LinJ.08.0140	LinJ.08.0140	transcript	LinJ.08.0140:mRNA	protein_coding	2019-01-01	c.105T>C	p.Ala35Ala	105/1758	105/1758	35/585
LinJ.08	45353	.	T	C	.	.	ANN=C	missense_variant	MODERATE	LinJ.08.0140	LinJ.08.0140	transcript	LinJ.08.0140:mRNA	protein_coding	2019-01-01	c.443T>C	p.Leu148Pro	443/1758	443/1758	148/585
LinJ.08	45704	.	T	G	.	.	ANN=G	missense_variant	MODERATE	LinJ.08.0140	LinJ.08.0140	transcript	LinJ.08.0140:mRNA	protein_coding	2019-01-01	c.794T>G	p.Val265Gly	794/1758	794/1758	265/585
LinJ.08	46022	.	T	C	.	.	ANN=C	missense_variant	MODERATE	LinJ.08.0140	LinJ.08.0140	transcript	LinJ.08.0140:mRNA	protein_coding	2019-01-01	c.1112T>C	p.Val371Ala	1112/1758	1112/1758	371/585
LinJ.08	46186	.	T	C	.	.	ANN=C	missense_variant	MODERATE	LinJ.08.0140	LinJ.08.0140	transcript	LinJ.08.0140:mRNA	protein_coding	2019-01-01	c.1276T>C	p.Cys426Arg	1276/1758	1276/1758	426/585
LinJ.08	46326	.	A	G	.	.	ANN=G	synonymous_variant	LOW	LinJ.08.0140	LinJ.08.0140	transcript	LinJ.08.0140:mRNA	protein_coding	2019-01-01	c.1416A>G	p.Val472Val	1416/1758	1416/1758	472/585
LinJ.08	46497	.	T	C	.	.	ANN=C	synonymous_variant	LOW	LinJ.08.0140	LinJ.08.0140	transcript	LinJ.08.0140:mRNA	protein_coding	2019-01-01	c.1587T>C	p.Phe529Phe	1587/1758	1587/1758	529/585
LinJ.08	46502	.	G	A	.	.	ANN=A	missense_variant	MODERATE	LinJ.08.0140	LinJ.08.0140	transcript	LinJ.08.0140:mRNA	protein_coding	2019-01-01	c.1592G>A	p.Arg531Gln	1592/1758	1592/1758	531/585
LinJ.08	46686	.	C	G	.	.	ANN=G	intergenic_region	MODIFIER	LinJ.08.0140-LinJ.08.0150	LinJ.08.0140-LinJ.08.0150	intergenic_region	LinJ.08.0140-LinJ.08.0150	n.46686C>G
LinJ.08	47367	.	A	T	.	.	ANN=T	intergenic_region	MODIFIER	LinJ.08.0140-LinJ.08.0150	LinJ.08.0140-LinJ.08.0150	intergenic_region	LinJ.08.0140-LinJ.08.0150	n.47367A>T
LinJ.08	47587	.	G	C	.	.	ANN=C	missense_variant	MODERATE	LinJ.08.0150	LinJ.08.0150	transcript	LinJ.08.0150:mRNA	protein_coding	2019-01-01	c.18G>C	p.Lys6Asn	18/3783	18/3783	6/1260
LinJ.08	47782	.	A	G	.	.	ANN=G	synonymous_variant	LOW	LinJ.08.0150	LinJ.08.0150	transcript	LinJ.08.0150:mRNA	protein_coding	2019-01-01	c.213A>G	p.Val71Val	213/3783	213/3783	71/1260
LinJ.08	47793	.	A	G	.	.	ANN=G	missense_variant	MODERATE	LinJ.08.0150	LinJ.08.0150	transcript	LinJ.08.0150:mRNA	protein_coding	2019-01-01	c.224A>G	p.Asp75Gly	224/3783	224/3783	75/1260
LinJ.08	48116	.	C	G	.	.	ANN=G	missense_variant	MODERATE	LinJ.08.0150	LinJ.08.0150	transcript	LinJ.08.0150:mRNA	protein_coding	2019-01-01	c.547C>G	p.Gln183Glu	547/3783	547/3783	183/1260
LinJ.08	49443	.	T	C	.	.	ANN=C	missense_variant	MODERATE	LinJ.08.0150	LinJ.08.0150	transcript	LinJ.08.0150:mRNA	protein_coding	2019-01-01	c.1874T>C	p.Val625Ala	1874/3783	1874/3783	625/1260
LinJ.08	49493	.	A	C	.	.	ANN=C	missense_variant	MODERATE	LinJ.08.0150	LinJ.08.0150	transcript	LinJ.08.0150:mRNA	protein_coding	2019-01-01	c.1924A>C	p.Thr642Pro	1924/3783	1924/3783	642/1260
LinJ.08	49749	.	A	G	.	.	ANN=G	missense_variant	MODERATE	LinJ.08.0150	LinJ.08.0150	transcript	LinJ.08.0150:mRNA	protein_coding	2019-01-01	c.2180A>G	p.Asp727Gly	2180/3783	2180/3783	727/1260
LinJ.08	49758	.	T	A	.	.	ANN=A	missense_variant	MODERATE	LinJ.08.0150	LinJ.08.0150	transcript	LinJ.08.0150:mRNA	protein_coding	2019-01-01	c.2189T>A	p.Val730Asp	2189/3783	2189/3783	730/1260
LinJ.08	50210	.	A	C	.	.	ANN=C	missense_variant	MODERATE	LinJ.08.0150	LinJ.08.0150	transcript	LinJ.08.0150:mRNA	protein_coding	2019-01-01	c.2641A>C	p.Lys881Gln	2641/3783	2641/3783	881/1260
LinJ.08	50342	.	A	C	.	.	ANN=C	missense_variant	MODERATE	LinJ.08.0150	LinJ.08.0150	transcript	LinJ.08.0150:mRNA	protein_coding	2019-01-01	c.2773A>C	p.Ile925Leu	2773/3783	2773/3783	925/1260
LinJ.08	50605	.	C	T	.	.	ANN=T	synonymous_variant	LOW	LinJ.08.0150	LinJ.08.0150	transcript	LinJ.08.0150:mRNA	protein_coding	2019-01-01	c.3036C>T	p.Gly1012Gly	3036/3783	3036/3783	1012/1260
LinJ.08	51124	.	A	G	.	.	ANN=G	synonymous_variant	LOW	LinJ.08.0150	LinJ.08.0150	transcript	LinJ.08.0150:mRNA	protein_coding	2019-01-01	c.3555A>G	p.Ala1185Ala	3555/3783	3555/3783	1185/1260
LinJ.08	51368	.	T	C	.	.	ANN=C	intergenic_region	MODIFIER	LinJ.08.0150-LinJ.08.0160	LinJ.08.0150-LinJ.08.0160	intergenic_region	LinJ.08.0150-LinJ.08.0160	n.51368T>C
LinJ.08	51728	.	C	T	.	.	ANN=T	intergenic_region	MODIFIER	LinJ.08.0150-LinJ.08.0160	LinJ.08.0150-LinJ.08.0160	intergenic_region	LinJ.08.0150-LinJ.08.0160	n.51728C>T
LinJ.08	52067	.	A	C	.	.	ANN=C	intergenic_region	MODIFIER	LinJ.08.0150-LinJ.08.0160	LinJ.08.0150-LinJ.08.0160	intergenic_region	LinJ.08.0150-LinJ.08.0160	n.52067A>C
LinJ.08	52286	.	A	G	.	.	ANN=G	intergenic_region	MODIFIER	LinJ.08.0150-LinJ.08.0160	LinJ.08.0150-LinJ.08.0160	intergenic_region	LinJ.08.0150-LinJ.08.0160	n.52286A>G
LinJ.08	52473	.	C	T	.	.	ANN=T	synonymous_variant	LOW	LinJ.08.0160	LinJ.08.0160	transcript	LinJ.08.0160:mRNA	protein_coding	2019-01-01	c.57C>T	p.Ala19Ala	57/1500	57/1500	19/499
LinJ.08	53097	.	C	G	.	.	ANN=G	synonymous_variant	LOW	LinJ.08.0160	LinJ.08.0160	transcript	LinJ.08.0160:mRNA	protein_coding	2019-01-01	c.681C>G	p.Val227Val	681/1500	681/1500	227/499
LinJ.08	53298	.	A	G	.	.	ANN=G	synonymous_variant	LOW	LinJ.08.0160	LinJ.08.0160	transcript	LinJ.08.0160:mRNA	protein_coding	2019-01-01	c.882A>G	p.Pro294Pro	882/1500	882/1500	294/499
LinJ.08	53811	.	C	G	.	.	ANN=G	missense_variant	MODERATE	LinJ.08.0160	LinJ.08.0160	transcript	LinJ.08.0160:mRNA	protein_coding	2019-01-01	c.1395C>G	p.Asp465Glu	1395/1500	1395/1500	465/499
LinJ.08	53880	.	G	A	.	.	ANN=A	synonymous_variant	LOW	LinJ.08.0160	LinJ.08.0160	transcript	LinJ.08.0160:mRNA	protein_coding	2019-01-01	c.1464G>A	p.Ala488Ala	1464/1500	1464/1500	488/499
LinJ.08	54147	.	C	A	.	.	ANN=A	intergenic_region	MODIFIER	LinJ.08.0160-LinJ.08.0170	LinJ.08.0160-LinJ.08.0170	intergenic_region	LinJ.08.0160-LinJ.08.0170	n.54147C>A
LinJ.08	55836	.	T	G	.	.	ANN=G	intergenic_region	MODIFIER	LinJ.08.0170-LinJ.08.0180	LinJ.08.0170-LinJ.08.0180	intergenic_region	LinJ.08.0170-LinJ.08.0180	n.55836T>G
LinJ.08	57275	.	C	A	.	.	ANN=A	intergenic_region	MODIFIER	LinJ.08.0170-LinJ.08.0180	LinJ.08.0170-LinJ.08.0180	intergenic_region	LinJ.08.0170-LinJ.08.0180	n.57275C>A
LinJ.08	57295	.	T	A	.	.	ANN=A	intergenic_region	MODIFIER	LinJ.08.0170-LinJ.08.0180	LinJ.08.0170-LinJ.08.0180	intergenic_region	LinJ.08.0170-LinJ.08.0180	n.57295T>A
LinJ.08	57554	.	T	C	.	.	ANN=C	intergenic_region	MODIFIER	LinJ.08.0170-LinJ.08.0180	LinJ.08.0170-LinJ.08.0180	intergenic_region	LinJ.08.0170-LinJ.08.0180	n.57554T>C
LinJ.08	58118	.	C	G	.	.	ANN=G	intergenic_region	MODIFIER	LinJ.08.0170-LinJ.08.0180	LinJ.08.0170-LinJ.08.0180	intergenic_region	LinJ.08.0170-LinJ.08.0180	n.58118C>G
LinJ.08	58333	.	A	C	.	.	ANN=C	intergenic_region	MODIFIER	LinJ.08.0170-LinJ.08.0180	LinJ.08.0170-LinJ.08.0180	intergenic_region	LinJ.08.0170-LinJ.08.0180	n.58333A>C
LinJ.08	58473	.	G	C	.	.	ANN=C	intergenic_region	MODIFIER	LinJ.08.0170-LinJ.08.0180	LinJ.08.0170-LinJ.08.0180	intergenic_region	LinJ.08.0170-LinJ.08.0180	n.58473G>C
LinJ.08	58637	.	T	C	.	.	ANN=C	intergenic_region	MODIFIER	LinJ.08.0170-LinJ.08.0180	LinJ.08.0170-LinJ.08.0180	intergenic_region	LinJ.08.0170-LinJ.08.0180	n.58637T>C
LinJ.08	58952	.	C	T	.	.	ANN=T	intergenic_region	MODIFIER	LinJ.08.0170-LinJ.08.0180	LinJ.08.0170-LinJ.08.0180	intergenic_region	LinJ.08.0170-LinJ.08.0180	n.58952C>T
LinJ.08	58967	.	T	C	.	.	ANN=C	intergenic_region	MODIFIER	LinJ.08.0170-LinJ.08.0180	LinJ.08.0170-LinJ.08.0180	intergenic_region	LinJ.08.0170-LinJ.08.0180	n.58967T>C
LinJ.08	58981	.	C	T	.	.	ANN=T	intergenic_region	MODIFIER	LinJ.08.0170-LinJ.08.0180	LinJ.08.0170-LinJ.08.0180	intergenic_region	LinJ.08.0170-LinJ.08.0180	n.58981C>T
LinJ.08	59371	.	A	G	.	.	ANN=G	intergenic_region	MODIFIER	LinJ.08.0170-LinJ.08.0180	LinJ.08.0170-LinJ.08.0180	intergenic_region	LinJ.08.0170-LinJ.08.0180	n.59371A>G
LinJ.08	59735	.	G	T	.	.	ANN=T	intergenic_region	MODIFIER	LinJ.08.0170-LinJ.08.0180	LinJ.08.0170-LinJ.08.0180	intergenic_region	LinJ.08.0170-LinJ.08.0180	n.59735G>T
LinJ.08	59796	.	T	C	.	.	ANN=C	intergenic_region	MODIFIER	LinJ.08.0170-LinJ.08.0180	LinJ.08.0170-LinJ.08.0180	intergenic_region	LinJ.08.0170-LinJ.08.0180	n.59796T>C
LinJ.08	59845	.	T	G	.	.	ANN=G	intergenic_region	MODIFIER	LinJ.08.0170-LinJ.08.0180	LinJ.08.0170-LinJ.08.0180	intergenic_region	LinJ.08.0170-LinJ.08.0180	n.59845T>G
LinJ.08	59848	.	T	C	.	.	ANN=C	intergenic_region	MODIFIER	LinJ.08.0170-LinJ.08.0180	LinJ.08.0170-LinJ.08.0180	intergenic_region	LinJ.08.0170-LinJ.08.0180	n.59848T>C
LinJ.08	60354	.	C	T	.	.	ANN=T	intergenic_region	MODIFIER	LinJ.08.0170-LinJ.08.0180	LinJ.08.0170-LinJ.08.0180	intergenic_region	LinJ.08.0170-LinJ.08.0180	n.60354C>T
LinJ.08	60357	.	A	G	.	.	ANN=G	intergenic_region	MODIFIER	LinJ.08.0170-LinJ.08.0180	LinJ.08.0170-LinJ.08.0180	intergenic_region	LinJ.08.0170-LinJ.08.0180	n.60357A>G
LinJ.08	63843	.	T	C	.	.	ANN=C	intergenic_region	MODIFIER	LinJ.08.0180-LinJ.08.0190	LinJ.08.0180-LinJ.08.0190	intergenic_region	LinJ.08.0180-LinJ.08.0190	n.63843T>C
LinJ.08	63874	.	T	G	.	.	ANN=G	intergenic_region	MODIFIER	LinJ.08.0180-LinJ.08.0190	LinJ.08.0180-LinJ.08.0190	intergenic_region	LinJ.08.0180-LinJ.08.0190	n.63874T>G
LinJ.08	63921	.	T	C	.	.	ANN=C	intergenic_region	MODIFIER	LinJ.08.0180-LinJ.08.0190	LinJ.08.0180-LinJ.08.0190	intergenic_region	LinJ.08.0180-LinJ.08.0190	n.63921T>C
LinJ.08	64728	.	G	A	.	.	ANN=A	intergenic_region	MODIFIER	LinJ.08.0180-LinJ.08.0190	LinJ.08.0180-LinJ.08.0190	intergenic_region	LinJ.08.0180-LinJ.08.0190	n.64728G>A
LinJ.08	66334	.	C	A	.	.	ANN=A	intergenic_region	MODIFIER	LinJ.08.0180-LinJ.08.0190	LinJ.08.0180-LinJ.08.0190	intergenic_region	LinJ.08.0180-LinJ.08.0190	n.66334C>A
LinJ.08	66603	.	A	G	.	.	ANN=G	intergenic_region	MODIFIER	LinJ.08.0180-LinJ.08.0190	LinJ.08.0180-LinJ.08.0190	intergenic_region	LinJ.08.0180-LinJ.08.0190	n.66603A>G
LinJ.08	70402	.	A	G	.	.	ANN=G	synonymous_variant	LOW	LinJ.08.0190	LinJ.08.0190	transcript	LinJ.08.0190:mRNA	protein_coding	2019-01-01	c.666A>G	p.Glu222Glu	666/885	666/885	222/294
LinJ.08	71631	.	C	T	.	.	ANN=T	intergenic_region	MODIFIER	LinJ.08.0190-LinJ.08.0200	LinJ.08.0190-LinJ.08.0200	intergenic_region	LinJ.08.0190-LinJ.08.0200	n.71631C>T
LinJ.08	72895	.	C	G	.	.	ANN=G	missense_variant	MODERATE	LinJ.08.0200	LinJ.08.0200	transcript	LinJ.08.0200:mRNA	protein_coding	2019-01-01	c.437C>G	p.Thr146Arg	437/2064	437/2064	146/687
LinJ.08	73688	.	C	T	.	.	ANN=T	synonymous_variant	LOW	LinJ.08.0200	LinJ.08.0200	transcript	LinJ.08.0200:mRNA	protein_coding	2019-01-01	c.1230C>T	p.Cys410Cys	1230/2064	1230/2064	410/687
LinJ.08	75152	.	A	G	.	.	ANN=G	intergenic_region	MODIFIER	LinJ.08.0200-LinJ.08.0210	LinJ.08.0200-LinJ.08.0210	intergenic_region	LinJ.08.0200-LinJ.08.0210	n.75152A>G
LinJ.08	75483	.	C	T	.	.	ANN=T	intergenic_region	MODIFIER	LinJ.08.0200-LinJ.08.0210	LinJ.08.0200-LinJ.08.0210	intergenic_region	LinJ.08.0200-LinJ.08.0210	n.75483C>T
LinJ.08	75946	.	G	C	.	.	ANN=C	intergenic_region	MODIFIER	LinJ.08.0200-LinJ.08.0210	LinJ.08.0200-LinJ.08.0210	intergenic_region	LinJ.08.0200-LinJ.08.0210	n.75946G>C
LinJ.08	76369	.	G	C	.	.	ANN=C	missense_variant	MODERATE	LinJ.08.0210	LinJ.08.0210	transcript	LinJ.08.0210:mRNA	protein_coding	2019-01-01	c.423G>C	p.Lys141Asn	423/1962	423/1962	141/653
LinJ.08	78313	.	A	C	.	.	ANN=C	intergenic_region	MODIFIER	LinJ.08.0210-LinJ.08.0220	LinJ.08.0210-LinJ.08.0220	intergenic_region	LinJ.08.0210-LinJ.08.0220	n.78313A>C
LinJ.08	82179	.	G	T,C	.	.	ANN=T	synonymous_variant	LOW	LinJ.08.0230	LinJ.08.0230	transcript	LinJ.08.0230:mRNA	protein_coding	2019-01-01	c.417G>T	p.Thr139Thr	417/3288	417/3288	139/1095	,C	synonymous_variant	LOW	LinJ.08.0230	LinJ.08.0230	transcript	LinJ.08.0230:mRNA	protein_coding	2019-01-01	c.417G>C	p.Thr139Thr	417/3288	417/3288	139/1095
LinJ.08	87653	.	T	G	.	.	ANN=G	intergenic_region	MODIFIER	LinJ.08.0240-LinJ.08.0250	LinJ.08.0240-LinJ.08.0250	intergenic_region	LinJ.08.0240-LinJ.08.0250	n.87653T>G
LinJ.08	88586	.	G	C	.	.	ANN=C	intergenic_region	MODIFIER	LinJ.08.0240-LinJ.08.0250	LinJ.08.0240-LinJ.08.0250	intergenic_region	LinJ.08.0240-LinJ.08.0250	n.88586G>C
LinJ.08	88694	.	A	C	.	.	ANN=C	intergenic_region	MODIFIER	LinJ.08.0240-LinJ.08.0250	LinJ.08.0240-LinJ.08.0250	intergenic_region	LinJ.08.0240-LinJ.08.0250	n.88694A>C
LinJ.08	88785	.	C	A	.	.	ANN=A	intergenic_region	MODIFIER	LinJ.08.0240-LinJ.08.0250	LinJ.08.0240-LinJ.08.0250	intergenic_region	LinJ.08.0240-LinJ.08.0250	n.88785C>A
LinJ.08	105490	.	G	C	.	.	ANN=C	intergenic_region	MODIFIER	LinJ.08.0300-LinJ.08.0310	LinJ.08.0300-LinJ.08.0310	intergenic_region	LinJ.08.0300-LinJ.08.0310	n.105490G>C
LinJ.08	107317	.	C	A	.	.	ANN=A	intergenic_region	MODIFIER	LinJ.08.0310-LinJ.08.0320	LinJ.08.0310-LinJ.08.0320	intergenic_region	LinJ.08.0310-LinJ.08.0320	n.107317C>A
LinJ.08	109107	.	A	G	.	.	ANN=G	intergenic_region	MODIFIER	LinJ.08.0320-LinJ.08.0330	LinJ.08.0320-LinJ.08.0330	intergenic_region	LinJ.08.0320-LinJ.08.0330	n.109107A>G
LinJ.08	112662	.	T	C	.	.	ANN=C	intergenic_region	MODIFIER	LinJ.08.0340-LinJ.08.0350	LinJ.08.0340-LinJ.08.0350	intergenic_region	LinJ.08.0340-LinJ.08.0350	n.112662T>C
LinJ.08	121423	.	A	G	.	.	ANN=G	missense_variant	MODERATE	LinJ.08.0350	LinJ.08.0350	transcript	LinJ.08.0350:mRNA	protein_coding	2019-01-01	c.8672A>G	p.Gln2891Arg	8672/14313	8672/14313	2891/4770
LinJ.08	121494	.	G	A	.	.	ANN=A	missense_variant	MODERATE	LinJ.08.0350	LinJ.08.0350	transcript	LinJ.08.0350:mRNA	protein_coding	2019-01-01	c.8743G>A	p.Asp2915Asn	8743/14313	8743/14313	2915/4770
LinJ.08	121590	.	C	G	.	.	ANN=G	missense_variant	MODERATE	LinJ.08.0350	LinJ.08.0350	transcript	LinJ.08.0350:mRNA	protein_coding	2019-01-01	c.8839C>G	p.His2947Asp	8839/14313	8839/14313	2947/4770
LinJ.08	122417	.	A	C	.	.	ANN=C	missense_variant	MODERATE	LinJ.08.0350	LinJ.08.0350	transcript	LinJ.08.0350:mRNA	protein_coding	2019-01-01	c.9666A>C	p.Gln3222His	9666/14313	9666/14313	3222/4770
LinJ.08	122608	.	G	A	.	.	ANN=A	missense_variant	MODERATE	LinJ.08.0350	LinJ.08.0350	transcript	LinJ.08.0350:mRNA	protein_coding	2019-01-01	c.9857G>A	p.Gly3286Asp	9857/14313	9857/14313	3286/4770
LinJ.08	123143	.	T	C	.	.	ANN=C	synonymous_variant	LOW	LinJ.08.0350	LinJ.08.0350	transcript	LinJ.08.0350:mRNA	protein_coding	2019-01-01	c.10392T>C	p.Ala3464Ala	10392/14313	10392/14313	3464/4770
LinJ.08	124180	.	C	A	.	.	ANN=A	missense_variant	MODERATE	LinJ.08.0350	LinJ.08.0350	transcript	LinJ.08.0350:mRNA	protein_coding	2019-01-01	c.11429C>A	p.Pro3810His	11429/14313	11429/14313	3810/4770
LinJ.08	124220	.	C	G	.	.	ANN=G	synonymous_variant	LOW	LinJ.08.0350	LinJ.08.0350	transcript	LinJ.08.0350:mRNA	protein_coding	2019-01-01	c.11469C>G	p.Thr3823Thr	11469/14313	11469/14313	3823/4770
LinJ.08	124233	.	T	C	.	.	ANN=C	synonymous_variant	LOW	LinJ.08.0350	LinJ.08.0350	transcript	LinJ.08.0350:mRNA	protein_coding	2019-01-01	c.11482T>C	p.Leu3828Leu	11482/14313	11482/14313	3828/4770
LinJ.08	124260	.	A	G	.	.	ANN=G	missense_variant	MODERATE	LinJ.08.0350	LinJ.08.0350	transcript	LinJ.08.0350:mRNA	protein_coding	2019-01-01	c.11509A>G	p.Thr3837Ala	11509/14313	11509/14313	3837/4770
LinJ.08	124364	.	G	C	.	.	ANN=C	synonymous_variant	LOW	LinJ.08.0350	LinJ.08.0350	transcript	LinJ.08.0350:mRNA	protein_coding	2019-01-01	c.11613G>C	p.Val3871Val	11613/14313	11613/14313	3871/4770
LinJ.08	124507	.	C	T	.	.	ANN=T	missense_variant	MODERATE	LinJ.08.0350	LinJ.08.0350	transcript	LinJ.08.0350:mRNA	protein_coding	2019-01-01	c.11756C>T	p.Ala3919Val	11756/14313	11756/14313	3919/4770
LinJ.08	125257	.	T	C	.	.	ANN=C	missense_variant	MODERATE	LinJ.08.0350	LinJ.08.0350	transcript	LinJ.08.0350:mRNA	protein_coding	2019-01-01	c.12506T>C	p.Leu4169Ser	12506/14313	12506/14313	4169/4770
LinJ.08	125934	.	G	C	.	.	ANN=C	missense_variant	MODERATE	LinJ.08.0350	LinJ.08.0350	transcript	LinJ.08.0350:mRNA	protein_coding	2019-01-01	c.13183G>C	p.Ala4395Pro	13183/14313	13183/14313	4395/4770
LinJ.08	126482	.	A	G	.	.	ANN=G	synonymous_variant	LOW	LinJ.08.0350	LinJ.08.0350	transcript	LinJ.08.0350:mRNA	protein_coding	2019-01-01	c.13731A>G	p.Lys4577Lys	13731/14313	13731/14313	4577/4770
LinJ.08	127368	.	G	C	.	.	ANN=C	intergenic_region	MODIFIER	LinJ.08.0350-LinJ.08.0360	LinJ.08.0350-LinJ.08.0360	intergenic_region	LinJ.08.0350-LinJ.08.0360	n.127368G>C
LinJ.08	127978	.	G	C	.	.	ANN=C	intergenic_region	MODIFIER	LinJ.08.0350-LinJ.08.0360	LinJ.08.0350-LinJ.08.0360	intergenic_region	LinJ.08.0350-LinJ.08.0360	n.127978G>C
LinJ.08	128597	.	G	C	.	.	ANN=C	missense_variant	MODERATE	LinJ.08.0360	LinJ.08.0360	transcript	LinJ.08.0360:mRNA	protein_coding	2019-01-01	c.278G>C	p.Trp93Ser	278/4239	278/4239	93/1412
LinJ.08	128630	.	G	A	.	.	ANN=A	missense_variant	MODERATE	LinJ.08.0360	LinJ.08.0360	transcript	LinJ.08.0360:mRNA	protein_coding	2019-01-01	c.311G>A	p.Gly104Asp	311/4239	311/4239	104/1412
LinJ.08	128842	.	T	G	.	.	ANN=G	missense_variant	MODERATE	LinJ.08.0360	LinJ.08.0360	transcript	LinJ.08.0360:mRNA	protein_coding	2019-01-01	c.523T>G	p.Ser175Ala	523/4239	523/4239	175/1412
LinJ.08	129301	.	A	C	.	.	ANN=C	missense_variant	MODERATE	LinJ.08.0360	LinJ.08.0360	transcript	LinJ.08.0360:mRNA	protein_coding	2019-01-01	c.982A>C	p.Thr328Pro	982/4239	982/4239	328/1412
LinJ.08	129418	.	T	A	.	.	ANN=A	missense_variant	MODERATE	LinJ.08.0360	LinJ.08.0360	transcript	LinJ.08.0360:mRNA	protein_coding	2019-01-01	c.1099T>A	p.Ser367Thr	1099/4239	1099/4239	367/1412
LinJ.08	129521	.	A	G	.	.	ANN=G	missense_variant	MODERATE	LinJ.08.0360	LinJ.08.0360	transcript	LinJ.08.0360:mRNA	protein_coding	2019-01-01	c.1202A>G	p.Asp401Gly	1202/4239	1202/4239	401/1412
LinJ.08	129526	.	G	C	.	.	ANN=C	missense_variant	MODERATE	LinJ.08.0360	LinJ.08.0360	transcript	LinJ.08.0360:mRNA	protein_coding	2019-01-01	c.1207G>C	p.Glu403Gln	1207/4239	1207/4239	403/1412
LinJ.08	129546	.	T	C	.	.	ANN=C	synonymous_variant	LOW	LinJ.08.0360	LinJ.08.0360	transcript	LinJ.08.0360:mRNA	protein_coding	2019-01-01	c.1227T>C	p.Ser409Ser	1227/4239	1227/4239	409/1412
LinJ.08	129776	.	T	C	.	.	ANN=C	missense_variant	MODERATE	LinJ.08.0360	LinJ.08.0360	transcript	LinJ.08.0360:mRNA	protein_coding	2019-01-01	c.1457T>C	p.Leu486Pro	1457/4239	1457/4239	486/1412
LinJ.08	129783	.	T	C	.	.	ANN=C	synonymous_variant	LOW	LinJ.08.0360	LinJ.08.0360	transcript	LinJ.08.0360:mRNA	protein_coding	2019-01-01	c.1464T>C	p.Gly488Gly	1464/4239	1464/4239	488/1412
LinJ.08	130063	.	G	C	.	.	ANN=C	missense_variant	MODERATE	LinJ.08.0360	LinJ.08.0360	transcript	LinJ.08.0360:mRNA	protein_coding	2019-01-01	c.1744G>C	p.Ala582Pro	1744/4239	1744/4239	582/1412
LinJ.08	130181	.	A	C	.	.	ANN=C	missense_variant	MODERATE	LinJ.08.0360	LinJ.08.0360	transcript	LinJ.08.0360:mRNA	protein_coding	2019-01-01	c.1862A>C	p.Asp621Ala	1862/4239	1862/4239	621/1412
LinJ.08	130496	.	G	A	.	.	ANN=A	missense_variant	MODERATE	LinJ.08.0360	LinJ.08.0360	transcript	LinJ.08.0360:mRNA	protein_coding	2019-01-01	c.2177G>A	p.Arg726Lys	2177/4239	2177/4239	726/1412
LinJ.08	131357	.	T	A	.	.	ANN=A	missense_variant	MODERATE	LinJ.08.0360	LinJ.08.0360	transcript	LinJ.08.0360:mRNA	protein_coding	2019-01-01	c.3038T>A	p.Val1013Glu	3038/4239	3038/4239	1013/1412
LinJ.08	131436	.	T	C	.	.	ANN=C	synonymous_variant	LOW	LinJ.08.0360	LinJ.08.0360	transcript	LinJ.08.0360:mRNA	protein_coding	2019-01-01	c.3117T>C	p.Thr1039Thr	3117/4239	3117/4239	1039/1412
LinJ.08	131775	.	A	G	.	.	ANN=G	synonymous_variant	LOW	LinJ.08.0360	LinJ.08.0360	transcript	LinJ.08.0360:mRNA	protein_coding	2019-01-01	c.3456A>G	p.Ala1152Ala	3456/4239	3456/4239	1152/1412
LinJ.08	132013	.	A	G	.	.	ANN=G	missense_variant	MODERATE	LinJ.08.0360	LinJ.08.0360	transcript	LinJ.08.0360:mRNA	protein_coding	2019-01-01	c.3694A>G	p.Thr1232Ala	3694/4239	3694/4239	1232/1412
LinJ.08	132561	.	A	C	.	.	ANN=C	intergenic_region	MODIFIER	LinJ.08.0360-LinJ.08.0370	LinJ.08.0360-LinJ.08.0370	intergenic_region	LinJ.08.0360-LinJ.08.0370	n.132561A>C
LinJ.08	132735	.	T	G	.	.	ANN=G	intergenic_region	MODIFIER	LinJ.08.0360-LinJ.08.0370	LinJ.08.0360-LinJ.08.0370	intergenic_region	LinJ.08.0360-LinJ.08.0370	n.132735T>G
LinJ.08	133158	.	T	G	.	.	ANN=G	intergenic_region	MODIFIER	LinJ.08.0360-LinJ.08.0370	LinJ.08.0360-LinJ.08.0370	intergenic_region	LinJ.08.0360-LinJ.08.0370	n.133158T>G
LinJ.08	133773	.	A	C	.	.	ANN=C	intergenic_region	MODIFIER	LinJ.08.0360-LinJ.08.0370	LinJ.08.0360-LinJ.08.0370	intergenic_region	LinJ.08.0360-LinJ.08.0370	n.133773A>C
LinJ.08	134538	.	T	C	.	.	ANN=C	intergenic_region	MODIFIER	LinJ.08.0360-LinJ.08.0370	LinJ.08.0360-LinJ.08.0370	intergenic_region	LinJ.08.0360-LinJ.08.0370	n.134538T>C
LinJ.08	134707	.	T	G	.	.	ANN=G	intergenic_region	MODIFIER	LinJ.08.0360-LinJ.08.0370	LinJ.08.0360-LinJ.08.0370	intergenic_region	LinJ.08.0360-LinJ.08.0370	n.134707T>G
LinJ.08	134738	.	T	C	.	.	ANN=C	intergenic_region	MODIFIER	LinJ.08.0360-LinJ.08.0370	LinJ.08.0360-LinJ.08.0370	intergenic_region	LinJ.08.0360-LinJ.08.0370	n.134738T>C
LinJ.08	134819	.	A	G	.	.	ANN=G	intergenic_region	MODIFIER	LinJ.08.0360-LinJ.08.0370	LinJ.08.0360-LinJ.08.0370	intergenic_region	LinJ.08.0360-LinJ.08.0370	n.134819A>G
LinJ.08	135205	.	T	C	.	.	ANN=C	intergenic_region	MODIFIER	LinJ.08.0360-LinJ.08.0370	LinJ.08.0360-LinJ.08.0370	intergenic_region	LinJ.08.0360-LinJ.08.0370	n.135205T>C
LinJ.08	135347	.	T	C	.	.	ANN=C	intergenic_region	MODIFIER	LinJ.08.0360-LinJ.08.0370	LinJ.08.0360-LinJ.08.0370	intergenic_region	LinJ.08.0360-LinJ.08.0370	n.135347T>C
LinJ.08	135409	.	C	T	.	.	ANN=T	intergenic_region	MODIFIER	LinJ.08.0360-LinJ.08.0370	LinJ.08.0360-LinJ.08.0370	intergenic_region	LinJ.08.0360-LinJ.08.0370	n.135409C>T
LinJ.08	135596	.	G	C	.	.	ANN=C	intergenic_region	MODIFIER	LinJ.08.0360-LinJ.08.0370	LinJ.08.0360-LinJ.08.0370	intergenic_region	LinJ.08.0360-LinJ.08.0370	n.135596G>C
LinJ.08	135647	.	C	G	.	.	ANN=G	intergenic_region	MODIFIER	LinJ.08.0360-LinJ.08.0370	LinJ.08.0360-LinJ.08.0370	intergenic_region	LinJ.08.0360-LinJ.08.0370	n.135647C>G
LinJ.08	135741	.	T	C	.	.	ANN=C	intergenic_region	MODIFIER	LinJ.08.0360-LinJ.08.0370	LinJ.08.0360-LinJ.08.0370	intergenic_region	LinJ.08.0360-LinJ.08.0370	n.135741T>C
LinJ.08	136282	.	T	C	.	.	ANN=C	synonymous_variant	LOW	LinJ.08.0370	LinJ.08.0370	transcript	LinJ.08.0370:mRNA	protein_coding	2019-01-01	c.453T>C	p.Ala151Ala	453/1731	453/1731	151/576
LinJ.08	136779	.	T	A	.	.	ANN=A	missense_variant	MODERATE	LinJ.08.0370	LinJ.08.0370	transcript	LinJ.08.0370:mRNA	protein_coding	2019-01-01	c.950T>A	p.Val317Glu	950/1731	950/1731	317/576
LinJ.08	136982	.	G	A	.	.	ANN=A	missense_variant	MODERATE	LinJ.08.0370	LinJ.08.0370	transcript	LinJ.08.0370:mRNA	protein_coding	2019-01-01	c.1153G>A	p.Gly385Ser	1153/1731	1153/1731	385/576
LinJ.08	137517	.	A	G	.	.	ANN=G	missense_variant	MODERATE	LinJ.08.0370	LinJ.08.0370	transcript	LinJ.08.0370:mRNA	protein_coding	2019-01-01	c.1688A>G	p.Lys563Arg	1688/1731	1688/1731	563/576
LinJ.08	137848	.	A	G	.	.	ANN=G	intergenic_region	MODIFIER	LinJ.08.0370-LinJ.08.0380	LinJ.08.0370-LinJ.08.0380	intergenic_region	LinJ.08.0370-LinJ.08.0380	n.137848A>G
LinJ.08	137921	.	C	T	.	.	ANN=T	intergenic_region	MODIFIER	LinJ.08.0370-LinJ.08.0380	LinJ.08.0370-LinJ.08.0380	intergenic_region	LinJ.08.0370-LinJ.08.0380	n.137921C>T
LinJ.08	138495	.	C	T	.	.	ANN=T	intergenic_region	MODIFIER	LinJ.08.0370-LinJ.08.0380	LinJ.08.0370-LinJ.08.0380	intergenic_region	LinJ.08.0370-LinJ.08.0380	n.138495C>T
LinJ.08	138584	.	T	C	.	.	ANN=C	intergenic_region	MODIFIER	LinJ.08.0370-LinJ.08.0380	LinJ.08.0370-LinJ.08.0380	intergenic_region	LinJ.08.0370-LinJ.08.0380	n.138584T>C
LinJ.08	138931	.	G	A	.	.	ANN=A	intergenic_region	MODIFIER	LinJ.08.0370-LinJ.08.0380	LinJ.08.0370-LinJ.08.0380	intergenic_region	LinJ.08.0370-LinJ.08.0380	n.138931G>A
LinJ.08	138943	.	A	G	.	.	ANN=G	intergenic_region	MODIFIER	LinJ.08.0370-LinJ.08.0380	LinJ.08.0370-LinJ.08.0380	intergenic_region	LinJ.08.0370-LinJ.08.0380	n.138943A>G
LinJ.08	138951	.	G	A	.	.	ANN=A	intergenic_region	MODIFIER	LinJ.08.0370-LinJ.08.0380	LinJ.08.0370-LinJ.08.0380	intergenic_region	LinJ.08.0370-LinJ.08.0380	n.138951G>A
LinJ.08	138978	.	G	C	.	.	ANN=C	intergenic_region	MODIFIER	LinJ.08.0370-LinJ.08.0380	LinJ.08.0370-LinJ.08.0380	intergenic_region	LinJ.08.0370-LinJ.08.0380	n.138978G>C
LinJ.08	139127	.	A	G	.	.	ANN=G	missense_variant	MODERATE	LinJ.08.0380	LinJ.08.0380	transcript	LinJ.08.0380:mRNA	protein_coding	2019-01-01	c.121A>G	p.Ser41Gly	121/663	121/663	41/220
LinJ.08	140139	.	C	T	.	.	ANN=T	intergenic_region	MODIFIER	LinJ.08.0380-LinJ.08.0390	LinJ.08.0380-LinJ.08.0390	intergenic_region	LinJ.08.0380-LinJ.08.0390	n.140139C>T
LinJ.08	140171	.	C	G	.	.	ANN=G	intergenic_region	MODIFIER	LinJ.08.0380-LinJ.08.0390	LinJ.08.0380-LinJ.08.0390	intergenic_region	LinJ.08.0380-LinJ.08.0390	n.140171C>G
LinJ.08	140448	.	C	T	.	.	ANN=T	intergenic_region	MODIFIER	LinJ.08.0380-LinJ.08.0390	LinJ.08.0380-LinJ.08.0390	intergenic_region	LinJ.08.0380-LinJ.08.0390	n.140448C>T
LinJ.08	140472	.	A	C	.	.	ANN=C	intergenic_region	MODIFIER	LinJ.08.0380-LinJ.08.0390	LinJ.08.0380-LinJ.08.0390	intergenic_region	LinJ.08.0380-LinJ.08.0390	n.140472A>C
LinJ.08	140980	.	C	A	.	.	ANN=A	synonymous_variant	LOW	LinJ.08.0390	LinJ.08.0390	transcript	LinJ.08.0390:mRNA	protein_coding	2019-01-01	c.213C>A	p.Arg71Arg	213/5733	213/5733	71/1910
LinJ.08	141124	.	G	A	.	.	ANN=A	synonymous_variant	LOW	LinJ.08.0390	LinJ.08.0390	transcript	LinJ.08.0390:mRNA	protein_coding	2019-01-01	c.357G>A	p.Val119Val	357/5733	357/5733	119/1910
LinJ.08	141204	.	A	G	.	.	ANN=G	missense_variant	MODERATE	LinJ.08.0390	LinJ.08.0390	transcript	LinJ.08.0390:mRNA	protein_coding	2019-01-01	c.437A>G	p.His146Arg	437/5733	437/5733	146/1910
LinJ.08	141433	.	C	T	.	.	ANN=T	synonymous_variant	LOW	LinJ.08.0390	LinJ.08.0390	transcript	LinJ.08.0390:mRNA	protein_coding	2019-01-01	c.666C>T	p.Arg222Arg	666/5733	666/5733	222/1910
LinJ.08	141850	.	T	C	.	.	ANN=C	synonymous_variant	LOW	LinJ.08.0390	LinJ.08.0390	transcript	LinJ.08.0390:mRNA	protein_coding	2019-01-01	c.1083T>C	p.Ser361Ser	1083/5733	1083/5733	361/1910
LinJ.08	141879	.	G	A	.	.	ANN=A	missense_variant	MODERATE	LinJ.08.0390	LinJ.08.0390	transcript	LinJ.08.0390:mRNA	protein_coding	2019-01-01	c.1112G>A	p.Arg371His	1112/5733	1112/5733	371/1910
LinJ.08	141946	.	G	T	.	.	ANN=T	synonymous_variant	LOW	LinJ.08.0390	LinJ.08.0390	transcript	LinJ.08.0390:mRNA	protein_coding	2019-01-01	c.1179G>T	p.Ala393Ala	1179/5733	1179/5733	393/1910
LinJ.08	142097	.	C	A	.	.	ANN=A	missense_variant	MODERATE	LinJ.08.0390	LinJ.08.0390	transcript	LinJ.08.0390:mRNA	protein_coding	2019-01-01	c.1330C>A	p.Arg444Ser	1330/5733	1330/5733	444/1910
LinJ.08	142205	.	C	T	.	.	ANN=T	missense_variant	MODERATE	LinJ.08.0390	LinJ.08.0390	transcript	LinJ.08.0390:mRNA	protein_coding	2019-01-01	c.1438C>T	p.Leu480Phe	1438/5733	1438/5733	480/1910
LinJ.08	142750	.	G	C	.	.	ANN=C	synonymous_variant	LOW	LinJ.08.0390	LinJ.08.0390	transcript	LinJ.08.0390:mRNA	protein_coding	2019-01-01	c.1983G>C	p.Leu661Leu	1983/5733	1983/5733	661/1910
LinJ.08	143080	.	T	C	.	.	ANN=C	synonymous_variant	LOW	LinJ.08.0390	LinJ.08.0390	transcript	LinJ.08.0390:mRNA	protein_coding	2019-01-01	c.2313T>C	p.Tyr771Tyr	2313/5733	2313/5733	771/1910
LinJ.08	143454	.	C	T	.	.	ANN=T	missense_variant	MODERATE	LinJ.08.0390	LinJ.08.0390	transcript	LinJ.08.0390:mRNA	protein_coding	2019-01-01	c.2687C>T	p.Pro896Leu	2687/5733	2687/5733	896/1910
LinJ.08	143911	.	T	C	.	.	ANN=C	synonymous_variant	LOW	LinJ.08.0390	LinJ.08.0390	transcript	LinJ.08.0390:mRNA	protein_coding	2019-01-01	c.3144T>C	p.Ile1048Ile	3144/5733	3144/5733	1048/1910
LinJ.08	144339	.	A	T	.	.	ANN=T	missense_variant	MODERATE	LinJ.08.0390	LinJ.08.0390	transcript	LinJ.08.0390:mRNA	protein_coding	2019-01-01	c.3572A>T	p.His1191Leu	3572/5733	3572/5733	1191/1910
LinJ.08	144955	.	T	C	.	.	ANN=C	synonymous_variant	LOW	LinJ.08.0390	LinJ.08.0390	transcript	LinJ.08.0390:mRNA	protein_coding	2019-01-01	c.4188T>C	p.Ala1396Ala	4188/5733	4188/5733	1396/1910
LinJ.08	145557	.	G	C	.	.	ANN=C	missense_variant	MODERATE	LinJ.08.0390	LinJ.08.0390	transcript	LinJ.08.0390:mRNA	protein_coding	2019-01-01	c.4790G>C	p.Gly1597Ala	4790/5733	4790/5733	1597/1910
LinJ.08	145590	.	C	T	.	.	ANN=T	missense_variant	MODERATE	LinJ.08.0390	LinJ.08.0390	transcript	LinJ.08.0390:mRNA	protein_coding	2019-01-01	c.4823C>T	p.Ala1608Val	4823/5733	4823/5733	1608/1910
LinJ.08	145723	.	C	A	.	.	ANN=A	missense_variant	MODERATE	LinJ.08.0390	LinJ.08.0390	transcript	LinJ.08.0390:mRNA	protein_coding	2019-01-01	c.4956C>A	p.His1652Gln	4956/5733	4956/5733	1652/1910
LinJ.08	150369	.	A	G	.	.	ANN=G	synonymous_variant	LOW	LinJ.08.0400	LinJ.08.0400	transcript	LinJ.08.0400:mRNA	protein_coding	2019-01-01	c.2088A>G	p.Glu696Glu	2088/5661	2088/5661	696/1886
LinJ.08	152338	.	C	A	.	.	ANN=A	missense_variant	MODERATE	LinJ.08.0400	LinJ.08.0400	transcript	LinJ.08.0400:mRNA	protein_coding	2019-01-01	c.4057C>A	p.Leu1353Met	4057/5661	4057/5661	1353/1886
LinJ.08	152599	.	G	A	.	.	ANN=A	missense_variant	MODERATE	LinJ.08.0400	LinJ.08.0400	transcript	LinJ.08.0400:mRNA	protein_coding	2019-01-01	c.4318G>A	p.Gly1440Ser	4318/5661	4318/5661	1440/1886
LinJ.08	152694	.	G	A	.	.	ANN=A	synonymous_variant	LOW	LinJ.08.0400	LinJ.08.0400	transcript	LinJ.08.0400:mRNA	protein_coding	2019-01-01	c.4413G>A	p.Thr1471Thr	4413/5661	4413/5661	1471/1886
LinJ.08	154103	.	C	T	.	.	ANN=T	intergenic_region	MODIFIER	LinJ.08.0400-LinJ.08.0410	LinJ.08.0400-LinJ.08.0410	intergenic_region	LinJ.08.0400-LinJ.08.0410	n.154103C>T
LinJ.08	154275	.	T	C	.	.	ANN=C	intergenic_region	MODIFIER	LinJ.08.0400-LinJ.08.0410	LinJ.08.0400-LinJ.08.0410	intergenic_region	LinJ.08.0400-LinJ.08.0410	n.154275T>C
LinJ.08	154731	.	T	C	.	.	ANN=C	intergenic_region	MODIFIER	LinJ.08.0400-LinJ.08.0410	LinJ.08.0400-LinJ.08.0410	intergenic_region	LinJ.08.0400-LinJ.08.0410	n.154731T>C
LinJ.08	155230	.	C	G	.	.	ANN=G	synonymous_variant	LOW	LinJ.08.0410	LinJ.08.0410	transcript	LinJ.08.0410:mRNA	protein_coding	2019-01-01	c.333C>G	p.Ala111Ala	333/3558	333/3558	111/1185
LinJ.08	155919	.	T	C	.	.	ANN=C	missense_variant	MODERATE	LinJ.08.0410	LinJ.08.0410	transcript	LinJ.08.0410:mRNA	protein_coding	2019-01-01	c.1022T>C	p.Leu341Pro	1022/3558	1022/3558	341/1185
LinJ.08	155947	.	T	C	.	.	ANN=C	synonymous_variant	LOW	LinJ.08.0410	LinJ.08.0410	transcript	LinJ.08.0410:mRNA	protein_coding	2019-01-01	c.1050T>C	p.Arg350Arg	1050/3558	1050/3558	350/1185
LinJ.08	156300	.	T	C	.	.	ANN=C	missense_variant	MODERATE	LinJ.08.0410	LinJ.08.0410	transcript	LinJ.08.0410:mRNA	protein_coding	2019-01-01	c.1403T>C	p.Val468Ala	1403/3558	1403/3558	468/1185
LinJ.08	156334	.	C	T	.	.	ANN=T	synonymous_variant	LOW	LinJ.08.0410	LinJ.08.0410	transcript	LinJ.08.0410:mRNA	protein_coding	2019-01-01	c.1437C>T	p.Ser479Ser	1437/3558	1437/3558	479/1185
LinJ.08	157093	.	C	T	.	.	ANN=T	synonymous_variant	LOW	LinJ.08.0410	LinJ.08.0410	transcript	LinJ.08.0410:mRNA	protein_coding	2019-01-01	c.2196C>T	p.Gly732Gly	2196/3558	2196/3558	732/1185
LinJ.08	157375	.	C	T	.	.	ANN=T	synonymous_variant	LOW	LinJ.08.0410	LinJ.08.0410	transcript	LinJ.08.0410:mRNA	protein_coding	2019-01-01	c.2478C>T	p.Asn826Asn	2478/3558	2478/3558	826/1185
LinJ.08	157541	.	G	A	.	.	ANN=A	missense_variant	MODERATE	LinJ.08.0410	LinJ.08.0410	transcript	LinJ.08.0410:mRNA	protein_coding	2019-01-01	c.2644G>A	p.Gly882Arg	2644/3558	2644/3558	882/1185
LinJ.08	158536	.	T	C	.	.	ANN=C	intergenic_region	MODIFIER	LinJ.08.0410-LinJ.08.0420	LinJ.08.0410-LinJ.08.0420	intergenic_region	LinJ.08.0410-LinJ.08.0420	n.158536T>C
LinJ.08	160957	.	T	C	.	.	ANN=C	synonymous_variant	LOW	LinJ.08.0420	LinJ.08.0420	transcript	LinJ.08.0420:mRNA	protein_coding	2019-01-01	c.1158T>C	p.Gly386Gly	1158/4212	1158/4212	386/1403
LinJ.08	160966	.	T	C	.	.	ANN=C	synonymous_variant	LOW	LinJ.08.0420	LinJ.08.0420	transcript	LinJ.08.0420:mRNA	protein_coding	2019-01-01	c.1167T>C	p.Asp389Asp	1167/4212	1167/4212	389/1403
LinJ.08	161029	.	T	C	.	.	ANN=C	synonymous_variant	LOW	LinJ.08.0420	LinJ.08.0420	transcript	LinJ.08.0420:mRNA	protein_coding	2019-01-01	c.1230T>C	p.Cys410Cys	1230/4212	1230/4212	410/1403
LinJ.08	161371	.	G	C	.	.	ANN=C	synonymous_variant	LOW	LinJ.08.0420	LinJ.08.0420	transcript	LinJ.08.0420:mRNA	protein_coding	2019-01-01	c.1572G>C	p.Arg524Arg	1572/4212	1572/4212	524/1403
LinJ.08	162378	.	G	A	.	.	ANN=A	missense_variant	MODERATE	LinJ.08.0420	LinJ.08.0420	transcript	LinJ.08.0420:mRNA	protein_coding	2019-01-01	c.2579G>A	p.Cys860Tyr	2579/4212	2579/4212	860/1403
LinJ.08	162415	.	C	T	.	.	ANN=T	synonymous_variant	LOW	LinJ.08.0420	LinJ.08.0420	transcript	LinJ.08.0420:mRNA	protein_coding	2019-01-01	c.2616C>T	p.Ala872Ala	2616/4212	2616/4212	872/1403
LinJ.08	163600	.	G	A	.	.	ANN=A	synonymous_variant	LOW	LinJ.08.0420	LinJ.08.0420	transcript	LinJ.08.0420:mRNA	protein_coding	2019-01-01	c.3801G>A	p.Thr1267Thr	3801/4212	3801/4212	1267/1403
LinJ.08	164461	.	T	C	.	.	ANN=C	intergenic_region	MODIFIER	LinJ.08.0420-LinJ.08.0430	LinJ.08.0420-LinJ.08.0430	intergenic_region	LinJ.08.0420-LinJ.08.0430	n.164461T>C
LinJ.08	164709	.	G	A	.	.	ANN=A	intergenic_region	MODIFIER	LinJ.08.0420-LinJ.08.0430	LinJ.08.0420-LinJ.08.0430	intergenic_region	LinJ.08.0420-LinJ.08.0430	n.164709G>A
LinJ.08	165450	.	G	C	.	.	ANN=C	intergenic_region	MODIFIER	LinJ.08.0420-LinJ.08.0430	LinJ.08.0420-LinJ.08.0430	intergenic_region	LinJ.08.0420-LinJ.08.0430	n.165450G>C
LinJ.08	165670	.	G	A	.	.	ANN=A	intergenic_region	MODIFIER	LinJ.08.0420-LinJ.08.0430	LinJ.08.0420-LinJ.08.0430	intergenic_region	LinJ.08.0420-LinJ.08.0430	n.165670G>A
LinJ.08	165765	.	T	G	.	.	ANN=G	intergenic_region	MODIFIER	LinJ.08.0420-LinJ.08.0430	LinJ.08.0420-LinJ.08.0430	intergenic_region	LinJ.08.0420-LinJ.08.0430	n.165765T>G
LinJ.08	172765	.	A	G	.	.	ANN=G	intergenic_region	MODIFIER	LinJ.08.0430-LinJ.08.0440	LinJ.08.0430-LinJ.08.0440	intergenic_region	LinJ.08.0430-LinJ.08.0440	n.172765A>G
LinJ.08	173246	.	A	G	.	.	ANN=G	intergenic_region	MODIFIER	LinJ.08.0430-LinJ.08.0440	LinJ.08.0430-LinJ.08.0440	intergenic_region	LinJ.08.0430-LinJ.08.0440	n.173246A>G
LinJ.08	174616	.	G	A	.	.	ANN=A	missense_variant	MODERATE	LinJ.08.0440	LinJ.08.0440	transcript	LinJ.08.0440:mRNA	protein_coding	2019-01-01	c.547G>A	p.Gly183Ser	547/2778	547/2778	183/925
LinJ.08	177800	.	C	T	.	.	ANN=T	intergenic_region	MODIFIER	LinJ.08.0440-LinJ.08.0450	LinJ.08.0440-LinJ.08.0450	intergenic_region	LinJ.08.0440-LinJ.08.0450	n.177800C>T
LinJ.08	186588	.	C	T	.	.	ANN=T	synonymous_variant	LOW	LinJ.08.0460	LinJ.08.0460	transcript	LinJ.08.0460:mRNA	protein_coding	2019-01-01	c.417C>T	p.Gly139Gly	417/543	417/543	139/180
LinJ.08	192493	.	T	C	.	.	ANN=C	intergenic_region	MODIFIER	LinJ.08.0480-LinJ.08.0490	LinJ.08.0480-LinJ.08.0490	intergenic_region	LinJ.08.0480-LinJ.08.0490	n.192493T>C
LinJ.08	192672	.	T	C	.	.	ANN=C	intergenic_region	MODIFIER	LinJ.08.0480-LinJ.08.0490	LinJ.08.0480-LinJ.08.0490	intergenic_region	LinJ.08.0480-LinJ.08.0490	n.192672T>C
LinJ.08	192908	.	T	C	.	.	ANN=C	intergenic_region	MODIFIER	LinJ.08.0480-LinJ.08.0490	LinJ.08.0480-LinJ.08.0490	intergenic_region	LinJ.08.0480-LinJ.08.0490	n.192908T>C
LinJ.08	193096	.	C	G	.	.	ANN=G	intergenic_region	MODIFIER	LinJ.08.0480-LinJ.08.0490	LinJ.08.0480-LinJ.08.0490	intergenic_region	LinJ.08.0480-LinJ.08.0490	n.193096C>G
LinJ.08	193574	.	A	C	.	.	ANN=C	intergenic_region	MODIFIER	LinJ.08.0480-LinJ.08.0490	LinJ.08.0480-LinJ.08.0490	intergenic_region	LinJ.08.0480-LinJ.08.0490	n.193574A>C
LinJ.08	204939	.	T	G	.	.	ANN=G	intergenic_region	MODIFIER	LinJ.08.0520-LinJ.08.0530	LinJ.08.0520-LinJ.08.0530	intergenic_region	LinJ.08.0520-LinJ.08.0530	n.204939T>G
LinJ.08	205335	.	T	G	.	.	ANN=G	synonymous_variant	LOW	LinJ.08.0530	LinJ.08.0530	transcript	LinJ.08.0530:mRNA	protein_coding	2019-01-01	c.366T>G	p.Ala122Ala	366/6987	366/6987	122/2328
LinJ.08	211855	.	A	G	.	.	ANN=G	missense_variant	MODERATE	LinJ.08.0530	LinJ.08.0530	transcript	LinJ.08.0530:mRNA	protein_coding	2019-01-01	c.6886A>G	p.Ser2296Gly	6886/6987	6886/6987	2296/2328
LinJ.08	214882	.	A	C	.	.	ANN=C	missense_variant	MODERATE	LinJ.08.0540	LinJ.08.0540	transcript	LinJ.08.0540:mRNA	protein_coding	2019-01-01	c.2410A>C	p.Asn804His	2410/6339	2410/6339	804/2112
LinJ.08	214930	.	G	A	.	.	ANN=A	missense_variant	MODERATE	LinJ.08.0540	LinJ.08.0540	transcript	LinJ.08.0540:mRNA	protein_coding	2019-01-01	c.2458G>A	p.Ala820Thr	2458/6339	2458/6339	820/2112
LinJ.08	214960	.	A	G	.	.	ANN=G	missense_variant	MODERATE	LinJ.08.0540	LinJ.08.0540	transcript	LinJ.08.0540:mRNA	protein_coding	2019-01-01	c.2488A>G	p.Thr830Ala	2488/6339	2488/6339	830/2112
LinJ.08	214965	.	C	A	.	.	ANN=A	synonymous_variant	LOW	LinJ.08.0540	LinJ.08.0540	transcript	LinJ.08.0540:mRNA	protein_coding	2019-01-01	c.2493C>A	p.Arg831Arg	2493/6339	2493/6339	831/2112
LinJ.08	214974	.	A	G	.	.	ANN=G	synonymous_variant	LOW	LinJ.08.0540	LinJ.08.0540	transcript	LinJ.08.0540:mRNA	protein_coding	2019-01-01	c.2502A>G	p.Thr834Thr	2502/6339	2502/6339	834/2112
LinJ.08	214996	.	A	G	.	.	ANN=G	missense_variant	MODERATE	LinJ.08.0540	LinJ.08.0540	transcript	LinJ.08.0540:mRNA	protein_coding	2019-01-01	c.2524A>G	p.Ser842Gly	2524/6339	2524/6339	842/2112
LinJ.08	215024	.	A	G	.	.	ANN=G	missense_variant	MODERATE	LinJ.08.0540	LinJ.08.0540	transcript	LinJ.08.0540:mRNA	protein_coding	2019-01-01	c.2552A>G	p.Tyr851Cys	2552/6339	2552/6339	851/2112
LinJ.08	215095	.	G	A	.	.	ANN=A	missense_variant	MODERATE	LinJ.08.0540	LinJ.08.0540	transcript	LinJ.08.0540:mRNA	protein_coding	2019-01-01	c.2623G>A	p.Gly875Arg	2623/6339	2623/6339	875/2112
LinJ.08	215144	.	G	A	.	.	ANN=A	missense_variant	MODERATE	LinJ.08.0540	LinJ.08.0540	transcript	LinJ.08.0540:mRNA	protein_coding	2019-01-01	c.2672G>A	p.Gly891Asp	2672/6339	2672/6339	891/2112
LinJ.08	215218	.	T	C	.	.	ANN=C	missense_variant	MODERATE	LinJ.08.0540	LinJ.08.0540	transcript	LinJ.08.0540:mRNA	protein_coding	2019-01-01	c.2746T>C	p.Cys916Arg	2746/6339	2746/6339	916/2112
LinJ.08	215353	.	C	T	.	.	ANN=T	missense_variant	MODERATE	LinJ.08.0540	LinJ.08.0540	transcript	LinJ.08.0540:mRNA	protein_coding	2019-01-01	c.2881C>T	p.His961Tyr	2881/6339	2881/6339	961/2112
LinJ.08	215377	.	T	G	.	.	ANN=G	missense_variant	MODERATE	LinJ.08.0540	LinJ.08.0540	transcript	LinJ.08.0540:mRNA	protein_coding	2019-01-01	c.2905T>G	p.Ser969Ala	2905/6339	2905/6339	969/2112
LinJ.08	218937	.	C	T	.	.	ANN=T	intergenic_region	MODIFIER	LinJ.08.0540-LinJ.08.0550	LinJ.08.0540-LinJ.08.0550	intergenic_region	LinJ.08.0540-LinJ.08.0550	n.218937C>T
LinJ.08	219404	.	C	G	.	.	ANN=G	missense_variant	MODERATE	LinJ.08.0550	LinJ.08.0550	transcript	LinJ.08.0550:mRNA	protein_coding	2019-01-01	c.14C>G	p.Thr5Ser	14/1059	14/1059	5/352
LinJ.08	219492	.	G	C	.	.	ANN=C	synonymous_variant	LOW	LinJ.08.0550	LinJ.08.0550	transcript	LinJ.08.0550:mRNA	protein_coding	2019-01-01	c.102G>C	p.Ala34Ala	102/1059	102/1059	34/352
LinJ.08	219670	.	G	T	.	.	ANN=T	missense_variant	MODERATE	LinJ.08.0550	LinJ.08.0550	transcript	LinJ.08.0550:mRNA	protein_coding	2019-01-01	c.280G>T	p.Val94Phe	280/1059	280/1059	94/352
LinJ.08	219764	.	C	G	.	.	ANN=G	missense_variant	MODERATE	LinJ.08.0550	LinJ.08.0550	transcript	LinJ.08.0550:mRNA	protein_coding	2019-01-01	c.374C>G	p.Ala125Gly	374/1059	374/1059	125/352
LinJ.08	219777	.	C	T	.	.	ANN=T	synonymous_variant	LOW	LinJ.08.0550	LinJ.08.0550	transcript	LinJ.08.0550:mRNA	protein_coding	2019-01-01	c.387C>T	p.Ser129Ser	387/1059	387/1059	129/352
LinJ.08	219785	.	A	G	.	.	ANN=G	missense_variant	MODERATE	LinJ.08.0550	LinJ.08.0550	transcript	LinJ.08.0550:mRNA	protein_coding	2019-01-01	c.395A>G	p.Asn132Ser	395/1059	395/1059	132/352
LinJ.08	220438	.	A	G	.	.	ANN=G	missense_variant	MODERATE	LinJ.08.0550	LinJ.08.0550	transcript	LinJ.08.0550:mRNA	protein_coding	2019-01-01	c.1048A>G	p.Met350Val	1048/1059	1048/1059	350/352
LinJ.08	220489	.	A	G	.	.	ANN=G	intergenic_region	MODIFIER	LinJ.08.0550-LinJ.08.0560	LinJ.08.0550-LinJ.08.0560	intergenic_region	LinJ.08.0550-LinJ.08.0560	n.220489A>G
LinJ.08	220563	.	A	G	.	.	ANN=G	intergenic_region	MODIFIER	LinJ.08.0550-LinJ.08.0560	LinJ.08.0550-LinJ.08.0560	intergenic_region	LinJ.08.0550-LinJ.08.0560	n.220563A>G
LinJ.08	220644	.	A	G	.	.	ANN=G	intergenic_region	MODIFIER	LinJ.08.0550-LinJ.08.0560	LinJ.08.0550-LinJ.08.0560	intergenic_region	LinJ.08.0550-LinJ.08.0560	n.220644A>G
LinJ.08	220723	.	T	G	.	.	ANN=G	intergenic_region	MODIFIER	LinJ.08.0550-LinJ.08.0560	LinJ.08.0550-LinJ.08.0560	intergenic_region	LinJ.08.0550-LinJ.08.0560	n.220723T>G
LinJ.08	220776	.	A	G	.	.	ANN=G	intergenic_region	MODIFIER	LinJ.08.0550-LinJ.08.0560	LinJ.08.0550-LinJ.08.0560	intergenic_region	LinJ.08.0550-LinJ.08.0560	n.220776A>G
LinJ.08	220925	.	T	G	.	.	ANN=G	intergenic_region	MODIFIER	LinJ.08.0550-LinJ.08.0560	LinJ.08.0550-LinJ.08.0560	intergenic_region	LinJ.08.0550-LinJ.08.0560	n.220925T>G
LinJ.08	221096	.	C	A	.	.	ANN=A	intergenic_region	MODIFIER	LinJ.08.0550-LinJ.08.0560	LinJ.08.0550-LinJ.08.0560	intergenic_region	LinJ.08.0550-LinJ.08.0560	n.221096C>A
LinJ.08	221819	.	T	C	.	.	ANN=C	intergenic_region	MODIFIER	LinJ.08.0550-LinJ.08.0560	LinJ.08.0550-LinJ.08.0560	intergenic_region	LinJ.08.0550-LinJ.08.0560	n.221819T>C
LinJ.08	221867	.	C	T	.	.	ANN=T	intergenic_region	MODIFIER	LinJ.08.0550-LinJ.08.0560	LinJ.08.0550-LinJ.08.0560	intergenic_region	LinJ.08.0550-LinJ.08.0560	n.221867C>T
LinJ.08	221868	.	C	T	.	.	ANN=T	intergenic_region	MODIFIER	LinJ.08.0550-LinJ.08.0560	LinJ.08.0550-LinJ.08.0560	intergenic_region	LinJ.08.0550-LinJ.08.0560	n.221868C>T
LinJ.08	221948	.	A	G	.	.	ANN=G	intergenic_region	MODIFIER	LinJ.08.0550-LinJ.08.0560	LinJ.08.0550-LinJ.08.0560	intergenic_region	LinJ.08.0550-LinJ.08.0560	n.221948A>G
LinJ.08	222057	.	A	G	.	.	ANN=G	intergenic_region	MODIFIER	LinJ.08.0550-LinJ.08.0560	LinJ.08.0550-LinJ.08.0560	intergenic_region	LinJ.08.0550-LinJ.08.0560	n.222057A>G
LinJ.08	222088	.	G	A	.	.	ANN=A	intergenic_region	MODIFIER	LinJ.08.0550-LinJ.08.0560	LinJ.08.0550-LinJ.08.0560	intergenic_region	LinJ.08.0550-LinJ.08.0560	n.222088G>A
LinJ.08	222297	.	G	T	.	.	ANN=T	intergenic_region	MODIFIER	LinJ.08.0550-LinJ.08.0560	LinJ.08.0550-LinJ.08.0560	intergenic_region	LinJ.08.0550-LinJ.08.0560	n.222297G>T
LinJ.08	223767	.	C	T	.	.	ANN=T	synonymous_variant	LOW	LinJ.08.0560	LinJ.08.0560	transcript	LinJ.08.0560:mRNA	protein_coding	2019-01-01	c.807C>T	p.Cys269Cys	807/1467	807/1467	269/488
LinJ.08	226243	.	T	C	.	.	ANN=C	missense_variant	MODERATE	LinJ.08.0570	LinJ.08.0570	transcript	LinJ.08.0570:mRNA	protein_coding	2019-01-01	c.14T>C	p.Val5Ala	14/1038	14/1038	5/345
LinJ.08	263508	.	T	G	.	.	ANN=G	synonymous_variant	LOW	LinJ.08.0640	LinJ.08.0640	transcript	LinJ.08.0640:mRNA	protein_coding	2019-01-01	c.1230T>G	p.Val410Val	1230/6651	1230/6651	410/2216
LinJ.08	263710	.	A	C	.	.	ANN=C	missense_variant	MODERATE	LinJ.08.0640	LinJ.08.0640	transcript	LinJ.08.0640:mRNA	protein_coding	2019-01-01	c.1432A>C	p.Ser478Arg	1432/6651	1432/6651	478/2216
LinJ.08	263745	.	T	C	.	.	ANN=C	synonymous_variant	LOW	LinJ.08.0640	LinJ.08.0640	transcript	LinJ.08.0640:mRNA	protein_coding	2019-01-01	c.1467T>C	p.Arg489Arg	1467/6651	1467/6651	489/2216
LinJ.08	264553	.	A	G	.	.	ANN=G	missense_variant	MODERATE	LinJ.08.0640	LinJ.08.0640	transcript	LinJ.08.0640:mRNA	protein_coding	2019-01-01	c.2275A>G	p.Ile759Val	2275/6651	2275/6651	759/2216
LinJ.08	321130	.	G	T	.	.	ANN=T	intergenic_region	MODIFIER	LinJ.08.0740-LinJ.08.0750	LinJ.08.0740-LinJ.08.0750	intergenic_region	LinJ.08.0740-LinJ.08.0750	n.321130G>T
LinJ.08	321627	.	C	A	.	.	ANN=A	intergenic_region	MODIFIER	LinJ.08.0740-LinJ.08.0750	LinJ.08.0740-LinJ.08.0750	intergenic_region	LinJ.08.0740-LinJ.08.0750	n.321627C>A
LinJ.08	321628	.	G	A	.	.	ANN=A	intergenic_region	MODIFIER	LinJ.08.0740-LinJ.08.0750	LinJ.08.0740-LinJ.08.0750	intergenic_region	LinJ.08.0740-LinJ.08.0750	n.321628G>A
LinJ.08	321754	.	C	T	.	.	ANN=T	intergenic_region	MODIFIER	LinJ.08.0740-LinJ.08.0750	LinJ.08.0740-LinJ.08.0750	intergenic_region	LinJ.08.0740-LinJ.08.0750	n.321754C>T
LinJ.08	322318	.	T	G	.	.	ANN=G	missense_variant	MODERATE	LinJ.08.0750	LinJ.08.0750	transcript	LinJ.08.0750:mRNA	protein_coding	2019-01-01	c.319T>G	p.Trp107Gly	319/1029	319/1029	107/342
LinJ.08	335011	.	A	G	.	.	ANN=G	synonymous_variant	LOW	LinJ.08.0790	LinJ.08.0790	transcript	LinJ.08.0790:mRNA	protein_coding	2019-01-01	c.513A>G	p.Leu171Leu	513/582	513/582	171/193
LinJ.08	335046	.	A	G	.	.	ANN=G	missense_variant	MODERATE	LinJ.08.0790	LinJ.08.0790	transcript	LinJ.08.0790:mRNA	protein_coding	2019-01-01	c.548A>G	p.Gln183Arg	548/582	548/582	183/193
LinJ.08	352352	.	C	T	.	.	ANN=T	intergenic_region	MODIFIER	LinJ.08.0830-LinJ.08.0840	LinJ.08.0830-LinJ.08.0840	intergenic_region	LinJ.08.0830-LinJ.08.0840	n.352352C>T
LinJ.08	377197	.	T	C	.	.	ANN=C	synonymous_variant	LOW	LinJ.08.0880	LinJ.08.0880	transcript	LinJ.08.0880:mRNA	protein_coding	2019-01-01	c.27A>G	p.Pro9Pro	27/804	27/804	9/267
LinJ.08	378488	.	T	C	.	.	ANN=C	intergenic_region	MODIFIER	LinJ.08.0890-LinJ.08.0900	LinJ.08.0890-LinJ.08.0900	intergenic_region	LinJ.08.0890-LinJ.08.0900	n.378488T>C
LinJ.08	386041	.	C	A	.	.	ANN=A	intergenic_region	MODIFIER	LinJ.08.0910-LinJ.08.0920	LinJ.08.0910-LinJ.08.0920	intergenic_region	LinJ.08.0910-LinJ.08.0920	n.386041C>A
LinJ.08	403814	.	T	C	.	.	ANN=C	missense_variant	MODERATE	LinJ.08.0940	LinJ.08.0940	transcript	LinJ.08.0940:mRNA	protein_coding	2019-01-01	c.952A>G	p.Ser318Gly	952/7374	952/7374	318/2457
LinJ.08	407177	.	T	C	.	.	ANN=C	intergenic_region	MODIFIER	LinJ.08.0940-LinJ.08.0950	LinJ.08.0940-LinJ.08.0950	intergenic_region	LinJ.08.0940-LinJ.08.0950	n.407177T>C
LinJ.08	417134	.	C	T,A	.	.	ANN=T	intergenic_region	MODIFIER	LinJ.08.1000-LinJ.08.1001	LinJ.08.1000-LinJ.08.1001	intergenic_region	LinJ.08.1000-LinJ.08.1001	n.417134C>T	,A	intergenic_region	MODIFIER	LinJ.08.1000-LinJ.08.1001	LinJ.08.1000-LinJ.08.1001	intergenic_region	LinJ.08.1000-LinJ.08.1001	n.417134C>A
LinJ.08	424808	.	G	A	.	.	ANN=A	intergenic_region	MODIFIER	LinJ.08.1000-LinJ.08.1001	LinJ.08.1000-LinJ.08.1001	intergenic_region	LinJ.08.1000-LinJ.08.1001	n.424808G>A
LinJ.08	430277	.	T	C	.	.	ANN=C	intergenic_region	MODIFIER	LinJ.08.1010-LinJ.08.1020	LinJ.08.1010-LinJ.08.1020	intergenic_region	LinJ.08.1010-LinJ.08.1020	n.430277T>C
LinJ.08	460842	.	C	T	.	.	ANN=T	intergenic_region	MODIFIER	LinJ.08.1100-LinJ.08.1110	LinJ.08.1100-LinJ.08.1110	intergenic_region	LinJ.08.1100-LinJ.08.1110	n.460842C>T
LinJ.08	473798	.	T	C	.	.	ANN=C	intergenic_region	MODIFIER	LinJ.08.1190-LinJ.08.1191	LinJ.08.1190-LinJ.08.1191	intergenic_region	LinJ.08.1190-LinJ.08.1191	n.473798T>C
LinJ.08	492000	.	G	A	.	.	ANN=A	missense_variant	MODERATE	LinJ.08.1300	LinJ.08.1300	transcript	LinJ.08.1300:mRNA	protein_coding	2019-01-01	c.863G>A	p.Ser288Asn	863/1893	863/1893	288/630
LinJ.08	493521	.	A	C	.	.	ANN=C	intergenic_region	MODIFIER	LinJ.08.1300-LinJ.08.1310	LinJ.08.1300-LinJ.08.1310	intergenic_region	LinJ.08.1300-LinJ.08.1310	n.493521A>C
LinJ.08	493652	.	T	C	.	.	ANN=C	intergenic_region	MODIFIER	LinJ.08.1300-LinJ.08.1310	LinJ.08.1300-LinJ.08.1310	intergenic_region	LinJ.08.1300-LinJ.08.1310	n.493652T>C
LinJ.09	3826	.	G	A	.	.	ANN=A	intergenic_region	MODIFIER	LinJ.09.0010	LinJ.09.0010	intergenic_region	LinJ.09.0010	n.3826G>A
LinJ.09	21825	.	C	A,T	.	.	ANN=A	missense_variant	MODERATE	LinJ.09.0090	LinJ.09.0090	transcript	LinJ.09.0090:mRNA	protein_coding	2019-01-01	c.1820C>A	p.Thr607Lys	1820/3705	1820/3705	607/1234	,T	missense_variant	MODERATE	LinJ.09.0090	LinJ.09.0090	transcript	LinJ.09.0090:mRNA	protein_coding	2019-01-01	c.1820C>T	p.Thr607Met	1820/3705	1820/3705	607/1234
LinJ.09	32417	.	C	T	.	.	ANN=T	intergenic_region	MODIFIER	LinJ.09.0100-LinJ.09.0110	LinJ.09.0100-LinJ.09.0110	intergenic_region	LinJ.09.0100-LinJ.09.0110	n.32417C>T
LinJ.09	44007	.	C	T	.	.	ANN=T	intergenic_region	MODIFIER	LinJ.09.0110-LinJ.09.0120	LinJ.09.0110-LinJ.09.0120	intergenic_region	LinJ.09.0110-LinJ.09.0120	n.44007C>T
LinJ.09	47006	.	G	T	.	.	ANN=T	intergenic_region	MODIFIER	LinJ.09.0110-LinJ.09.0120	LinJ.09.0110-LinJ.09.0120	intergenic_region	LinJ.09.0110-LinJ.09.0120	n.47006G>T
LinJ.09	50070	.	G	T	.	.	ANN=T	intergenic_region	MODIFIER	LinJ.09.0110-LinJ.09.0120	LinJ.09.0110-LinJ.09.0120	intergenic_region	LinJ.09.0110-LinJ.09.0120	n.50070G>T
LinJ.09	52317	.	C	T	.	.	ANN=T	intergenic_region	MODIFIER	LinJ.09.0120-LinJ.09.0130	LinJ.09.0120-LinJ.09.0130	intergenic_region	LinJ.09.0120-LinJ.09.0130	n.52317C>T
LinJ.09	55417	.	G	A	.	.	ANN=A	intergenic_region	MODIFIER	LinJ.09.0130-LinJ.09.0140	LinJ.09.0130-LinJ.09.0140	intergenic_region	LinJ.09.0130-LinJ.09.0140	n.55417G>A
LinJ.09	56156	.	G	A	.	.	ANN=A	synonymous_variant	LOW	LinJ.09.0140	LinJ.09.0140	transcript	LinJ.09.0140:mRNA	protein_coding	2019-01-01	c.147G>A	p.Lys49Lys	147/2136	147/2136	49/711
LinJ.09	56308	.	A	C	.	.	ANN=C	missense_variant	MODERATE	LinJ.09.0140	LinJ.09.0140	transcript	LinJ.09.0140:mRNA	protein_coding	2019-01-01	c.299A>C	p.Asp100Ala	299/2136	299/2136	100/711
LinJ.09	57709	.	C	G	.	.	ANN=G	missense_variant	MODERATE	LinJ.09.0140	LinJ.09.0140	transcript	LinJ.09.0140:mRNA	protein_coding	2019-01-01	c.1700C>G	p.Ala567Gly	1700/2136	1700/2136	567/711
LinJ.09	57811	.	T	G	.	.	ANN=G	missense_variant	MODERATE	LinJ.09.0140	LinJ.09.0140	transcript	LinJ.09.0140:mRNA	protein_coding	2019-01-01	c.1802T>G	p.Val601Gly	1802/2136	1802/2136	601/711
LinJ.09	57812	.	G	T	.	.	ANN=T	synonymous_variant	LOW	LinJ.09.0140	LinJ.09.0140	transcript	LinJ.09.0140:mRNA	protein_coding	2019-01-01	c.1803G>T	p.Val601Val	1803/2136	1803/2136	601/711
LinJ.09	57905	.	A	G	.	.	ANN=G	synonymous_variant	LOW	LinJ.09.0140	LinJ.09.0140	transcript	LinJ.09.0140:mRNA	protein_coding	2019-01-01	c.1896A>G	p.Ala632Ala	1896/2136	1896/2136	632/711
LinJ.09	57925	.	C	T	.	.	ANN=T	missense_variant	MODERATE	LinJ.09.0140	LinJ.09.0140	transcript	LinJ.09.0140:mRNA	protein_coding	2019-01-01	c.1916C>T	p.Ala639Val	1916/2136	1916/2136	639/711
LinJ.09	57929	.	A	G	.	.	ANN=G	synonymous_variant	LOW	LinJ.09.0140	LinJ.09.0140	transcript	LinJ.09.0140:mRNA	protein_coding	2019-01-01	c.1920A>G	p.Ala640Ala	1920/2136	1920/2136	640/711
LinJ.09	58062	.	T	G	.	.	ANN=G	missense_variant	MODERATE	LinJ.09.0140	LinJ.09.0140	transcript	LinJ.09.0140:mRNA	protein_coding	2019-01-01	c.2053T>G	p.Ser685Ala	2053/2136	2053/2136	685/711
LinJ.09	58208	.	G	T	.	.	ANN=T	intergenic_region	MODIFIER	LinJ.09.0140-LinJ.09.0150	LinJ.09.0140-LinJ.09.0150	intergenic_region	LinJ.09.0140-LinJ.09.0150	n.58208G>T
LinJ.09	58257	.	A	G	.	.	ANN=G	intergenic_region	MODIFIER	LinJ.09.0140-LinJ.09.0150	LinJ.09.0140-LinJ.09.0150	intergenic_region	LinJ.09.0140-LinJ.09.0150	n.58257A>G
LinJ.09	58700	.	C	T	.	.	ANN=T	intergenic_region	MODIFIER	LinJ.09.0140-LinJ.09.0150	LinJ.09.0140-LinJ.09.0150	intergenic_region	LinJ.09.0140-LinJ.09.0150	n.58700C>T
LinJ.09	59181	.	A	G	.	.	ANN=G	missense_variant	MODERATE	LinJ.09.0150	LinJ.09.0150	transcript	LinJ.09.0150:mRNA	protein_coding	2019-01-01	c.94A>G	p.Thr32Ala	94/3255	94/3255	32/1084
LinJ.09	59197	.	A	G	.	.	ANN=G	missense_variant	MODERATE	LinJ.09.0150	LinJ.09.0150	transcript	LinJ.09.0150:mRNA	protein_coding	2019-01-01	c.110A>G	p.His37Arg	110/3255	110/3255	37/1084
LinJ.09	59384	.	C	T	.	.	ANN=T	synonymous_variant	LOW	LinJ.09.0150	LinJ.09.0150	transcript	LinJ.09.0150:mRNA	protein_coding	2019-01-01	c.297C>T	p.Val99Val	297/3255	297/3255	99/1084
LinJ.09	59390	.	T	C	.	.	ANN=C	synonymous_variant	LOW	LinJ.09.0150	LinJ.09.0150	transcript	LinJ.09.0150:mRNA	protein_coding	2019-01-01	c.303T>C	p.Cys101Cys	303/3255	303/3255	101/1084
LinJ.09	62418	.	T	C	.	.	ANN=C	intergenic_region	MODIFIER	LinJ.09.0150-LinJ.09.0160	LinJ.09.0150-LinJ.09.0160	intergenic_region	LinJ.09.0150-LinJ.09.0160	n.62418T>C
LinJ.09	62570	.	G	T	.	.	ANN=T	intergenic_region	MODIFIER	LinJ.09.0150-LinJ.09.0160	LinJ.09.0150-LinJ.09.0160	intergenic_region	LinJ.09.0150-LinJ.09.0160	n.62570G>T
LinJ.09	72057	.	G	T	.	.	ANN=T	intergenic_region	MODIFIER	LinJ.09.0200-LinJ.09.0210	LinJ.09.0200-LinJ.09.0210	intergenic_region	LinJ.09.0200-LinJ.09.0210	n.72057G>T
LinJ.09	73053	.	C	T	.	.	ANN=T	synonymous_variant	LOW	LinJ.09.0210	LinJ.09.0210	transcript	LinJ.09.0210:mRNA	protein_coding	2019-01-01	c.105C>T	p.Arg35Arg	105/363	105/363	35/120
LinJ.09	73260	.	G	A	.	.	ANN=A	synonymous_variant	LOW	LinJ.09.0210	LinJ.09.0210	transcript	LinJ.09.0210:mRNA	protein_coding	2019-01-01	c.312G>A	p.Gln104Gln	312/363	312/363	104/120
LinJ.09	73299	.	A	G	.	.	ANN=G	synonymous_variant	LOW	LinJ.09.0210	LinJ.09.0210	transcript	LinJ.09.0210:mRNA	protein_coding	2019-01-01	c.351A>G	p.Glu117Glu	351/363	351/363	117/120
LinJ.09	73709	.	A	G	.	.	ANN=G	intergenic_region	MODIFIER	LinJ.09.0210-LinJ.09.0220	LinJ.09.0210-LinJ.09.0220	intergenic_region	LinJ.09.0210-LinJ.09.0220	n.73709A>G
LinJ.09	74102	.	G	T	.	.	ANN=T	intergenic_region	MODIFIER	LinJ.09.0210-LinJ.09.0220	LinJ.09.0210-LinJ.09.0220	intergenic_region	LinJ.09.0210-LinJ.09.0220	n.74102G>T
LinJ.09	74399	.	A	G	.	.	ANN=G	intergenic_region	MODIFIER	LinJ.09.0210-LinJ.09.0220	LinJ.09.0210-LinJ.09.0220	intergenic_region	LinJ.09.0210-LinJ.09.0220	n.74399A>G
LinJ.09	77836	.	C	T	.	.	ANN=T	intergenic_region	MODIFIER	LinJ.09.0230-LinJ.09.0240	LinJ.09.0230-LinJ.09.0240	intergenic_region	LinJ.09.0230-LinJ.09.0240	n.77836C>T
LinJ.09	98146	.	C	G	.	.	ANN=G	intergenic_region	MODIFIER	LinJ.09.0280-LinJ.09.0290	LinJ.09.0280-LinJ.09.0290	intergenic_region	LinJ.09.0280-LinJ.09.0290	n.98146C>G
LinJ.09	98897	.	A	C	.	.	ANN=C	missense_variant	MODERATE	LinJ.09.0290	LinJ.09.0290	transcript	LinJ.09.0290:mRNA	protein_coding	2019-01-01	c.139A>C	p.Met47Leu	139/2550	139/2550	47/849
LinJ.09	124332	.	A	G	.	.	ANN=G	intergenic_region	MODIFIER	LinJ.09.0370-LinJ.09.0380	LinJ.09.0370-LinJ.09.0380	intergenic_region	LinJ.09.0370-LinJ.09.0380	n.124332A>G
LinJ.09	124411	.	C	T	.	.	ANN=T	intergenic_region	MODIFIER	LinJ.09.0370-LinJ.09.0380	LinJ.09.0370-LinJ.09.0380	intergenic_region	LinJ.09.0370-LinJ.09.0380	n.124411C>T
LinJ.09	124631	.	G	A	.	.	ANN=A	synonymous_variant	LOW	LinJ.09.0380	LinJ.09.0380	transcript	LinJ.09.0380:mRNA	protein_coding	2019-01-01	c.84G>A	p.Lys28Lys	84/1512	84/1512	28/503
LinJ.09	130735	.	A	G	.	.	ANN=G	intergenic_region	MODIFIER	LinJ.09.0390-LinJ.09.0400	LinJ.09.0390-LinJ.09.0400	intergenic_region	LinJ.09.0390-LinJ.09.0400	n.130735A>G
LinJ.09	130910	.	C	T	.	.	ANN=T	intergenic_region	MODIFIER	LinJ.09.0390-LinJ.09.0400	LinJ.09.0390-LinJ.09.0400	intergenic_region	LinJ.09.0390-LinJ.09.0400	n.130910C>T
LinJ.09	134653	.	C	A	.	.	ANN=A	intergenic_region	MODIFIER	LinJ.09.0400-LinJ.09.0410	LinJ.09.0400-LinJ.09.0410	intergenic_region	LinJ.09.0400-LinJ.09.0410	n.134653C>A
LinJ.09	137280	.	A	G	.	.	ANN=G	intergenic_region	MODIFIER	LinJ.09.0410-LinJ.09.0420	LinJ.09.0410-LinJ.09.0420	intergenic_region	LinJ.09.0410-LinJ.09.0420	n.137280A>G
LinJ.09	139842	.	T	C	.	.	ANN=C	intergenic_region	MODIFIER	LinJ.09.0420-LinJ.09.0430	LinJ.09.0420-LinJ.09.0430	intergenic_region	LinJ.09.0420-LinJ.09.0430	n.139842T>C
LinJ.09	141811	.	A	T	.	.	ANN=T	intergenic_region	MODIFIER	LinJ.09.0420-LinJ.09.0430	LinJ.09.0420-LinJ.09.0430	intergenic_region	LinJ.09.0420-LinJ.09.0430	n.141811A>T
LinJ.09	141998	.	A	G	.	.	ANN=G	intergenic_region	MODIFIER	LinJ.09.0420-LinJ.09.0430	LinJ.09.0420-LinJ.09.0430	intergenic_region	LinJ.09.0420-LinJ.09.0430	n.141998A>G
LinJ.09	142114	.	T	C	.	.	ANN=C	intergenic_region	MODIFIER	LinJ.09.0420-LinJ.09.0430	LinJ.09.0420-LinJ.09.0430	intergenic_region	LinJ.09.0420-LinJ.09.0430	n.142114T>C
LinJ.09	160162	.	C	T	.	.	ANN=T	intergenic_region	MODIFIER	LinJ.09.0460-LinJ.09.0470	LinJ.09.0460-LinJ.09.0470	intergenic_region	LinJ.09.0460-LinJ.09.0470	n.160162C>T
LinJ.09	181240	.	T	C	.	.	ANN=C	synonymous_variant	LOW	LinJ.09.0501	LinJ.09.0501	transcript	LinJ.09.0501.1	protein_coding	2019-01-01	c.4861T>C	p.Leu1621Leu	4861/9258	4861/9258	1621/3085
LinJ.09	183984	.	A	G	.	.	ANN=G	synonymous_variant	LOW	LinJ.09.0501	LinJ.09.0501	transcript	LinJ.09.0501.1	protein_coding	2019-01-01	c.7605A>G	p.Leu2535Leu	7605/9258	7605/9258	2535/3085
LinJ.09	185916	.	G	A	.	.	ANN=A	intergenic_region	MODIFIER	LinJ.09.0501-LinJ.09.0520	LinJ.09.0501-LinJ.09.0520	intergenic_region	LinJ.09.0501-LinJ.09.0520	n.185916G>A
LinJ.09	185978	.	C	T	.	.	ANN=T	intergenic_region	MODIFIER	LinJ.09.0501-LinJ.09.0520	LinJ.09.0501-LinJ.09.0520	intergenic_region	LinJ.09.0501-LinJ.09.0520	n.185978C>T
LinJ.09	185986	.	C	T	.	.	ANN=T	intergenic_region	MODIFIER	LinJ.09.0501-LinJ.09.0520	LinJ.09.0501-LinJ.09.0520	intergenic_region	LinJ.09.0501-LinJ.09.0520	n.185986C>T
LinJ.09	186038	.	T	C	.	.	ANN=C	intergenic_region	MODIFIER	LinJ.09.0501-LinJ.09.0520	LinJ.09.0501-LinJ.09.0520	intergenic_region	LinJ.09.0501-LinJ.09.0520	n.186038T>C
LinJ.09	186107	.	G	T	.	.	ANN=T	intergenic_region	MODIFIER	LinJ.09.0501-LinJ.09.0520	LinJ.09.0501-LinJ.09.0520	intergenic_region	LinJ.09.0501-LinJ.09.0520	n.186107G>T
LinJ.09	186196	.	C	T	.	.	ANN=T	intergenic_region	MODIFIER	LinJ.09.0501-LinJ.09.0520	LinJ.09.0501-LinJ.09.0520	intergenic_region	LinJ.09.0501-LinJ.09.0520	n.186196C>T
LinJ.09	186331	.	C	T,A	.	.	ANN=T	intergenic_region	MODIFIER	LinJ.09.0501-LinJ.09.0520	LinJ.09.0501-LinJ.09.0520	intergenic_region	LinJ.09.0501-LinJ.09.0520	n.186331C>T	,A	intergenic_region	MODIFIER	LinJ.09.0501-LinJ.09.0520	LinJ.09.0501-LinJ.09.0520	intergenic_region	LinJ.09.0501-LinJ.09.0520	n.186331C>A
LinJ.09	187261	.	A	G	.	.	ANN=G	missense_variant	MODERATE	LinJ.09.0520	LinJ.09.0520	transcript	LinJ.09.0520:mRNA	protein_coding	2019-01-01	c.625A>G	p.Thr209Ala	625/1959	625/1959	209/652
LinJ.09	187266	.	G	T	.	.	ANN=T	synonymous_variant	LOW	LinJ.09.0520	LinJ.09.0520	transcript	LinJ.09.0520:mRNA	protein_coding	2019-01-01	c.630G>T	p.Leu210Leu	630/1959	630/1959	210/652
LinJ.09	187386	.	C	G	.	.	ANN=G	missense_variant	MODERATE	LinJ.09.0520	LinJ.09.0520	transcript	LinJ.09.0520:mRNA	protein_coding	2019-01-01	c.750C>G	p.His250Gln	750/1959	750/1959	250/652
LinJ.09	187509	.	G	T	.	.	ANN=T	synonymous_variant	LOW	LinJ.09.0520	LinJ.09.0520	transcript	LinJ.09.0520:mRNA	protein_coding	2019-01-01	c.873G>T	p.Arg291Arg	873/1959	873/1959	291/652
LinJ.09	187680	.	G	A	.	.	ANN=A	synonymous_variant	LOW	LinJ.09.0520	LinJ.09.0520	transcript	LinJ.09.0520:mRNA	protein_coding	2019-01-01	c.1044G>A	p.Glu348Glu	1044/1959	1044/1959	348/652
LinJ.09	187866	.	T	C	.	.	ANN=C	synonymous_variant	LOW	LinJ.09.0520	LinJ.09.0520	transcript	LinJ.09.0520:mRNA	protein_coding	2019-01-01	c.1230T>C	p.Tyr410Tyr	1230/1959	1230/1959	410/652
LinJ.09	188857	.	G	C	.	.	ANN=C	intergenic_region	MODIFIER	LinJ.09.0520-LinJ.09.0530	LinJ.09.0520-LinJ.09.0530	intergenic_region	LinJ.09.0520-LinJ.09.0530	n.188857G>C
LinJ.09	190901	.	T	G	.	.	ANN=G	intergenic_region	MODIFIER	LinJ.09.0520-LinJ.09.0530	LinJ.09.0520-LinJ.09.0530	intergenic_region	LinJ.09.0520-LinJ.09.0530	n.190901T>G
LinJ.09	191321	.	A	G	.	.	ANN=G	missense_variant	MODERATE	LinJ.09.0530	LinJ.09.0530	transcript	LinJ.09.0530:mRNA	protein_coding	2019-01-01	c.157A>G	p.Ile53Val	157/2235	157/2235	53/744
LinJ.09	193137	.	A	C	.	.	ANN=C	missense_variant	MODERATE	LinJ.09.0530	LinJ.09.0530	transcript	LinJ.09.0530:mRNA	protein_coding	2019-01-01	c.1973A>C	p.Tyr658Ser	1973/2235	1973/2235	658/744
LinJ.09	195749	.	A	G	.	.	ANN=G	intergenic_region	MODIFIER	LinJ.09.0540-LinJ.09.0550	LinJ.09.0540-LinJ.09.0550	intergenic_region	LinJ.09.0540-LinJ.09.0550	n.195749A>G
LinJ.09	196080	.	C	G	.	.	ANN=G	intergenic_region	MODIFIER	LinJ.09.0540-LinJ.09.0550	LinJ.09.0540-LinJ.09.0550	intergenic_region	LinJ.09.0540-LinJ.09.0550	n.196080C>G
LinJ.09	196931	.	G	A	.	.	ANN=A	synonymous_variant	LOW	LinJ.09.0550	LinJ.09.0550	transcript	LinJ.09.0550:mRNA	protein_coding	2019-01-01	c.111G>A	p.Arg37Arg	111/4518	111/4518	37/1505
LinJ.09	197198	.	A	G	.	.	ANN=G	synonymous_variant	LOW	LinJ.09.0550	LinJ.09.0550	transcript	LinJ.09.0550:mRNA	protein_coding	2019-01-01	c.378A>G	p.Ala126Ala	378/4518	378/4518	126/1505
LinJ.09	197273	.	C	G	.	.	ANN=G	synonymous_variant	LOW	LinJ.09.0550	LinJ.09.0550	transcript	LinJ.09.0550:mRNA	protein_coding	2019-01-01	c.453C>G	p.Pro151Pro	453/4518	453/4518	151/1505
LinJ.09	199220	.	T	G,A	.	.	ANN=G	synonymous_variant	LOW	LinJ.09.0550	LinJ.09.0550	transcript	LinJ.09.0550:mRNA	protein_coding	2019-01-01	c.2400T>G	p.Thr800Thr	2400/4518	2400/4518	800/1505	,A	synonymous_variant	LOW	LinJ.09.0550	LinJ.09.0550	transcript	LinJ.09.0550:mRNA	protein_coding	2019-01-01	c.2400T>A	p.Thr800Thr	2400/4518	2400/4518	800/1505
LinJ.09	199455	.	T	C	.	.	ANN=C	synonymous_variant	LOW	LinJ.09.0550	LinJ.09.0550	transcript	LinJ.09.0550:mRNA	protein_coding	2019-01-01	c.2635T>C	p.Leu879Leu	2635/4518	2635/4518	879/1505
LinJ.09	199832	.	A	G	.	.	ANN=G	synonymous_variant	LOW	LinJ.09.0550	LinJ.09.0550	transcript	LinJ.09.0550:mRNA	protein_coding	2019-01-01	c.3012A>G	p.Glu1004Glu	3012/4518	3012/4518	1004/1505
LinJ.09	201151	.	T	C	.	.	ANN=C	missense_variant	MODERATE	LinJ.09.0550	LinJ.09.0550	transcript	LinJ.09.0550:mRNA	protein_coding	2019-01-01	c.4331T>C	p.Met1444Thr	4331/4518	4331/4518	1444/1505
LinJ.09	201429	.	C	G	.	.	ANN=G	intergenic_region	MODIFIER	LinJ.09.0550-LinJ.09.0560	LinJ.09.0550-LinJ.09.0560	intergenic_region	LinJ.09.0550-LinJ.09.0560	n.201429C>G
LinJ.09	201670	.	T	C	.	.	ANN=C	intergenic_region	MODIFIER	LinJ.09.0550-LinJ.09.0560	LinJ.09.0550-LinJ.09.0560	intergenic_region	LinJ.09.0550-LinJ.09.0560	n.201670T>C
LinJ.09	201681	.	A	G	.	.	ANN=G	intergenic_region	MODIFIER	LinJ.09.0550-LinJ.09.0560	LinJ.09.0550-LinJ.09.0560	intergenic_region	LinJ.09.0550-LinJ.09.0560	n.201681A>G
LinJ.09	201797	.	G	A	.	.	ANN=A	intergenic_region	MODIFIER	LinJ.09.0550-LinJ.09.0560	LinJ.09.0550-LinJ.09.0560	intergenic_region	LinJ.09.0550-LinJ.09.0560	n.201797G>A
LinJ.09	201805	.	A	C	.	.	ANN=C	intergenic_region	MODIFIER	LinJ.09.0550-LinJ.09.0560	LinJ.09.0550-LinJ.09.0560	intergenic_region	LinJ.09.0550-LinJ.09.0560	n.201805A>C
LinJ.09	201966	.	A	C	.	.	ANN=C	intergenic_region	MODIFIER	LinJ.09.0550-LinJ.09.0560	LinJ.09.0550-LinJ.09.0560	intergenic_region	LinJ.09.0550-LinJ.09.0560	n.201966A>C
LinJ.09	202859	.	T	A	.	.	ANN=A	missense_variant	MODERATE	LinJ.09.0560	LinJ.09.0560	transcript	LinJ.09.0560:mRNA	protein_coding	2019-01-01	c.727T>A	p.Cys243Ser	727/1215	727/1215	243/404
LinJ.09	202880	.	C	A	.	.	ANN=A	missense_variant	MODERATE	LinJ.09.0560	LinJ.09.0560	transcript	LinJ.09.0560:mRNA	protein_coding	2019-01-01	c.748C>A	p.Pro250Thr	748/1215	748/1215	250/404
LinJ.09	202999	.	T	C	.	.	ANN=C	synonymous_variant	LOW	LinJ.09.0560	LinJ.09.0560	transcript	LinJ.09.0560:mRNA	protein_coding	2019-01-01	c.867T>C	p.Asp289Asp	867/1215	867/1215	289/404
LinJ.09	203063	.	A	G	.	.	ANN=G	missense_variant	MODERATE	LinJ.09.0560	LinJ.09.0560	transcript	LinJ.09.0560:mRNA	protein_coding	2019-01-01	c.931A>G	p.Thr311Ala	931/1215	931/1215	311/404
LinJ.09	203251	.	A	C	.	.	ANN=C	synonymous_variant	LOW	LinJ.09.0560	LinJ.09.0560	transcript	LinJ.09.0560:mRNA	protein_coding	2019-01-01	c.1119A>C	p.Leu373Leu	1119/1215	1119/1215	373/404
LinJ.09	203653	.	C	T	.	.	ANN=T	intergenic_region	MODIFIER	LinJ.09.0560-LinJ.09.0570	LinJ.09.0560-LinJ.09.0570	intergenic_region	LinJ.09.0560-LinJ.09.0570	n.203653C>T
LinJ.09	203663	.	A	C	.	.	ANN=C	intergenic_region	MODIFIER	LinJ.09.0560-LinJ.09.0570	LinJ.09.0560-LinJ.09.0570	intergenic_region	LinJ.09.0560-LinJ.09.0570	n.203663A>C
LinJ.09	204165	.	G	A	.	.	ANN=A	intergenic_region	MODIFIER	LinJ.09.0560-LinJ.09.0570	LinJ.09.0560-LinJ.09.0570	intergenic_region	LinJ.09.0560-LinJ.09.0570	n.204165G>A
LinJ.09	204233	.	T	C	.	.	ANN=C	intergenic_region	MODIFIER	LinJ.09.0560-LinJ.09.0570	LinJ.09.0560-LinJ.09.0570	intergenic_region	LinJ.09.0560-LinJ.09.0570	n.204233T>C
LinJ.09	205036	.	T	C	.	.	ANN=C	synonymous_variant	LOW	LinJ.09.0570	LinJ.09.0570	transcript	LinJ.09.0570:mRNA	protein_coding	2019-01-01	c.777T>C	p.Arg259Arg	777/2313	777/2313	259/770
LinJ.09	205257	.	G	A	.	.	ANN=A	missense_variant	MODERATE	LinJ.09.0570	LinJ.09.0570	transcript	LinJ.09.0570:mRNA	protein_coding	2019-01-01	c.998G>A	p.Ser333Asn	998/2313	998/2313	333/770
LinJ.09	216862	.	A	G	.	.	ANN=G	missense_variant	MODERATE	LinJ.09.0590	LinJ.09.0590	transcript	LinJ.09.0590:mRNA	protein_coding	2019-01-01	c.1291A>G	p.Met431Val	1291/3330	1291/3330	431/1109
LinJ.09	216960	.	T	C	.	.	ANN=C	synonymous_variant	LOW	LinJ.09.0590	LinJ.09.0590	transcript	LinJ.09.0590:mRNA	protein_coding	2019-01-01	c.1389T>C	p.Ala463Ala	1389/3330	1389/3330	463/1109
LinJ.09	217331	.	G	C	.	.	ANN=C	missense_variant	MODERATE	LinJ.09.0590	LinJ.09.0590	transcript	LinJ.09.0590:mRNA	protein_coding	2019-01-01	c.1760G>C	p.Arg587Pro	1760/3330	1760/3330	587/1109
LinJ.09	217506	.	G	T	.	.	ANN=T	missense_variant	MODERATE	LinJ.09.0590	LinJ.09.0590	transcript	LinJ.09.0590:mRNA	protein_coding	2019-01-01	c.1935G>T	p.Gln645His	1935/3330	1935/3330	645/1109
LinJ.09	217582	.	G	A	.	.	ANN=A	missense_variant	MODERATE	LinJ.09.0590	LinJ.09.0590	transcript	LinJ.09.0590:mRNA	protein_coding	2019-01-01	c.2011G>A	p.Asp671Asn	2011/3330	2011/3330	671/1109
LinJ.09	217601	.	C	G	.	.	ANN=G	missense_variant	MODERATE	LinJ.09.0590	LinJ.09.0590	transcript	LinJ.09.0590:mRNA	protein_coding	2019-01-01	c.2030C>G	p.Pro677Arg	2030/3330	2030/3330	677/1109
LinJ.09	217751	.	C	T	.	.	ANN=T	missense_variant	MODERATE	LinJ.09.0590	LinJ.09.0590	transcript	LinJ.09.0590:mRNA	protein_coding	2019-01-01	c.2180C>T	p.Thr727Ile	2180/3330	2180/3330	727/1109
LinJ.09	217923	.	T	A	.	.	ANN=A	synonymous_variant	LOW	LinJ.09.0590	LinJ.09.0590	transcript	LinJ.09.0590:mRNA	protein_coding	2019-01-01	c.2352T>A	p.Gly784Gly	2352/3330	2352/3330	784/1109
LinJ.09	218078	.	C	T	.	.	ANN=T	missense_variant	MODERATE	LinJ.09.0590	LinJ.09.0590	transcript	LinJ.09.0590:mRNA	protein_coding	2019-01-01	c.2507C>T	p.Pro836Leu	2507/3330	2507/3330	836/1109
LinJ.09	282398	.	T	C	.	.	ANN=C	missense_variant	MODERATE	LinJ.09.0790	LinJ.09.0790	transcript	LinJ.09.0790:mRNA	protein_coding	2019-01-01	c.2776A>G	p.Thr926Ala	2776/6687	2776/6687	926/2228
LinJ.09	284223	.	T	C	.	.	ANN=C	synonymous_variant	LOW	LinJ.09.0790	LinJ.09.0790	transcript	LinJ.09.0790:mRNA	protein_coding	2019-01-01	c.951A>G	p.Ala317Ala	951/6687	951/6687	317/2228
LinJ.09	285194	.	A	G	.	.	ANN=G	intergenic_region	MODIFIER	LinJ.09.0790-LinJ.09.0800	LinJ.09.0790-LinJ.09.0800	intergenic_region	LinJ.09.0790-LinJ.09.0800	n.285194A>G
LinJ.09	286247	.	A	G	.	.	ANN=G	intergenic_region	MODIFIER	LinJ.09.0790-LinJ.09.0800	LinJ.09.0790-LinJ.09.0800	intergenic_region	LinJ.09.0790-LinJ.09.0800	n.286247A>G
LinJ.09	289611	.	A	G	.	.	ANN=G	missense_variant	MODERATE	LinJ.09.0800	LinJ.09.0800	transcript	LinJ.09.0800:mRNA	protein_coding	2019-01-01	c.217T>C	p.Cys73Arg	217/2997	217/2997	73/998
LinJ.09	292630	.	G	A	.	.	ANN=A	synonymous_variant	LOW	LinJ.09.0810	LinJ.09.0810	transcript	LinJ.09.0810:mRNA	protein_coding	2019-01-01	c.14643C>T	p.Asn4881Asn	14643/16383	14643/16383	4881/5460
LinJ.09	293206	.	G	A	.	.	ANN=A	synonymous_variant	LOW	LinJ.09.0810	LinJ.09.0810	transcript	LinJ.09.0810:mRNA	protein_coding	2019-01-01	c.14067C>T	p.Asp4689Asp	14067/16383	14067/16383	4689/5460
LinJ.09	293632	.	T	G	.	.	ANN=G	missense_variant	MODERATE	LinJ.09.0810	LinJ.09.0810	transcript	LinJ.09.0810:mRNA	protein_coding	2019-01-01	c.13641A>C	p.Arg4547Ser	13641/16383	13641/16383	4547/5460
LinJ.09	293891	.	C	T	.	.	ANN=T	missense_variant	MODERATE	LinJ.09.0810	LinJ.09.0810	transcript	LinJ.09.0810:mRNA	protein_coding	2019-01-01	c.13382G>A	p.Ser4461Asn	13382/16383	13382/16383	4461/5460
LinJ.09	296480	.	G	C	.	.	ANN=C	missense_variant	MODERATE	LinJ.09.0810	LinJ.09.0810	transcript	LinJ.09.0810:mRNA	protein_coding	2019-01-01	c.10793C>G	p.Ala3598Gly	10793/16383	10793/16383	3598/5460
LinJ.09	297992	.	A	G	.	.	ANN=G	missense_variant	MODERATE	LinJ.09.0810	LinJ.09.0810	transcript	LinJ.09.0810:mRNA	protein_coding	2019-01-01	c.9281T>C	p.Phe3094Ser	9281/16383	9281/16383	3094/5460
LinJ.09	298405	.	G	A	.	.	ANN=A	synonymous_variant	LOW	LinJ.09.0810	LinJ.09.0810	transcript	LinJ.09.0810:mRNA	protein_coding	2019-01-01	c.8868C>T	p.Phe2956Phe	8868/16383	8868/16383	2956/5460
LinJ.09	334893	.	C	T	.	.	ANN=T	intergenic_region	MODIFIER	LinJ.09.0910-LinJ.09.0920	LinJ.09.0910-LinJ.09.0920	intergenic_region	LinJ.09.0910-LinJ.09.0920	n.334893C>T
LinJ.09	335225	.	C	A	.	.	ANN=A	intergenic_region	MODIFIER	LinJ.09.0910-LinJ.09.0920	LinJ.09.0910-LinJ.09.0920	intergenic_region	LinJ.09.0910-LinJ.09.0920	n.335225C>A
LinJ.09	335421	.	G	A	.	.	ANN=A	intergenic_region	MODIFIER	LinJ.09.0910-LinJ.09.0920	LinJ.09.0910-LinJ.09.0920	intergenic_region	LinJ.09.0910-LinJ.09.0920	n.335421G>A
LinJ.09	339775	.	G	A	.	.	ANN=A	intergenic_region	MODIFIER	LinJ.09.0930-LinJ.09.0940	LinJ.09.0930-LinJ.09.0940	intergenic_region	LinJ.09.0930-LinJ.09.0940	n.339775G>A
LinJ.09	373065	.	C	T	.	.	ANN=T	intergenic_region	MODIFIER	LinJ.09.1020-LinJ.09.1030	LinJ.09.1020-LinJ.09.1030	intergenic_region	LinJ.09.1020-LinJ.09.1030	n.373065C>T
LinJ.09	375131	.	G	A	.	.	ANN=A	intergenic_region	MODIFIER	LinJ.09.1030-LinJ.09.1040	LinJ.09.1030-LinJ.09.1040	intergenic_region	LinJ.09.1030-LinJ.09.1040	n.375131G>A
LinJ.09	378041	.	G	T	.	.	ANN=T	missense_variant	MODERATE	LinJ.09.1040	LinJ.09.1040	transcript	LinJ.09.1040:mRNA	protein_coding	2019-01-01	c.1739C>A	p.Ala580Asp	1739/2988	1739/2988	580/995
LinJ.09	456170	.	C	T	.	.	ANN=T	synonymous_variant	LOW	LinJ.09.1240	LinJ.09.1240	transcript	LinJ.09.1240:mRNA	protein_coding	2019-01-01	c.594G>A	p.Ala198Ala	594/2175	594/2175	198/724
LinJ.09	495211	.	A	G	.	.	ANN=G	intergenic_region	MODIFIER	LinJ.09.1330-LinJ.09.1340	LinJ.09.1330-LinJ.09.1340	intergenic_region	LinJ.09.1330-LinJ.09.1340	n.495211A>G
LinJ.09	495601	.	A	G	.	.	ANN=G	intergenic_region	MODIFIER	LinJ.09.1330-LinJ.09.1340	LinJ.09.1330-LinJ.09.1340	intergenic_region	LinJ.09.1330-LinJ.09.1340	n.495601A>G
LinJ.09	499851	.	T	C	.	.	ANN=C	intergenic_region	MODIFIER	LinJ.09.1350-LinJ.09.1360	LinJ.09.1350-LinJ.09.1360	intergenic_region	LinJ.09.1350-LinJ.09.1360	n.499851T>C
LinJ.09	500493	.	C	T	.	.	ANN=T	synonymous_variant	LOW	LinJ.09.1360	LinJ.09.1360	transcript	LinJ.09.1360:mRNA	protein_coding	2019-01-01	c.531G>A	p.Gln177Gln	531/657	531/657	177/218
LinJ.09	516157	.	G	C	.	.	ANN=C	intergenic_region	MODIFIER	LinJ.09.1410-LinJ.09.1420	LinJ.09.1410-LinJ.09.1420	intergenic_region	LinJ.09.1410-LinJ.09.1420	n.516157G>C
LinJ.09	516171	.	A	G	.	.	ANN=G	intergenic_region	MODIFIER	LinJ.09.1410-LinJ.09.1420	LinJ.09.1410-LinJ.09.1420	intergenic_region	LinJ.09.1410-LinJ.09.1420	n.516171A>G
LinJ.09	530891	.	A	G	.	.	ANN=G	synonymous_variant	LOW	LinJ.09.1470	LinJ.09.1470	transcript	LinJ.09.1470:mRNA	protein_coding	2019-01-01	c.105T>C	p.Leu35Leu	105/1611	105/1611	35/536
LinJ.09	553256	.	C	T	.	.	ANN=T	intergenic_region	MODIFIER	LinJ.09.1560-LinJ.09.1570	LinJ.09.1560-LinJ.09.1570	intergenic_region	LinJ.09.1560-LinJ.09.1570	n.553256C>T
LinJ.09	567068	.	C	A	.	.	ANN=A	intergenic_region	MODIFIER	LinJ.09.1630-LinJ.09.1640	LinJ.09.1630-LinJ.09.1640	intergenic_region	LinJ.09.1630-LinJ.09.1640	n.567068C>A
LinJ.09	567240	.	T	C	.	.	ANN=C	intergenic_region	MODIFIER	LinJ.09.1630-LinJ.09.1640	LinJ.09.1630-LinJ.09.1640	intergenic_region	LinJ.09.1630-LinJ.09.1640	n.567240T>C
LinJ.09	568422	.	A	G,C	.	.	ANN=G	intergenic_region	MODIFIER	,C	intergenic_region	MODIFIER
LinJ.09	569331	.	A	C	.	.	ANN=C	intergenic_region	MODIFIER
LinJ.10	65910	.	A	C	.	.	ANN=C	synonymous_variant	LOW	LinJ.10.0160	LinJ.10.0160	transcript	LinJ.10.0160:mRNA	protein_coding	2019-01-01	c.138A>C	p.Val46Val	138/717	138/717	46/238
LinJ.10	66199	.	T	G	.	.	ANN=G	missense_variant	MODERATE	LinJ.10.0160	LinJ.10.0160	transcript	LinJ.10.0160:mRNA	protein_coding	2019-01-01	c.427T>G	p.Cys143Gly	427/717	427/717	143/238
LinJ.10	95504	.	A	C	.	.	ANN=C	intergenic_region	MODIFIER	LinJ.10.0240-LinJ.10.0250	LinJ.10.0240-LinJ.10.0250	intergenic_region	LinJ.10.0240-LinJ.10.0250	n.95504A>C
LinJ.10	96249	.	T	C	.	.	ANN=C	intergenic_region	MODIFIER	LinJ.10.0240-LinJ.10.0250	LinJ.10.0240-LinJ.10.0250	intergenic_region	LinJ.10.0240-LinJ.10.0250	n.96249T>C
LinJ.10	98747	.	A	G	.	.	ANN=G	intergenic_region	MODIFIER	LinJ.10.0250-LinJ.10.0260	LinJ.10.0250-LinJ.10.0260	intergenic_region	LinJ.10.0250-LinJ.10.0260	n.98747A>G
LinJ.10	99349	.	T	C	.	.	ANN=C	intergenic_region	MODIFIER	LinJ.10.0250-LinJ.10.0260	LinJ.10.0250-LinJ.10.0260	intergenic_region	LinJ.10.0250-LinJ.10.0260	n.99349T>C
LinJ.10	101606	.	G	C	.	.	ANN=C	missense_variant	MODERATE	LinJ.10.0260	LinJ.10.0260	transcript	LinJ.10.0260:mRNA	protein_coding	2019-01-01	c.1870G>C	p.Ala624Pro	1870/2211	1870/2211	624/736
LinJ.10	106873	.	C	T	.	.	ANN=T	intergenic_region	MODIFIER	LinJ.10.0280-LinJ.10.0290	LinJ.10.0280-LinJ.10.0290	intergenic_region	LinJ.10.0280-LinJ.10.0290	n.106873C>T
LinJ.10	108963	.	A	G	.	.	ANN=G	missense_variant	MODERATE	LinJ.10.0290	LinJ.10.0290	transcript	LinJ.10.0290:mRNA	protein_coding	2019-01-01	c.1978A>G	p.Thr660Ala	1978/2790	1978/2790	660/929
LinJ.10	108991	.	G	A	.	.	ANN=A	missense_variant	MODERATE	LinJ.10.0290	LinJ.10.0290	transcript	LinJ.10.0290:mRNA	protein_coding	2019-01-01	c.2006G>A	p.Cys669Tyr	2006/2790	2006/2790	669/929
LinJ.10	109927	.	C	T	.	.	ANN=T	intergenic_region	MODIFIER	LinJ.10.0290-LinJ.10.0300	LinJ.10.0290-LinJ.10.0300	intergenic_region	LinJ.10.0290-LinJ.10.0300	n.109927C>T
LinJ.10	120432	.	A	G	.	.	ANN=G	intergenic_region	MODIFIER	LinJ.10.0310-LinJ.10.0320	LinJ.10.0310-LinJ.10.0320	intergenic_region	LinJ.10.0310-LinJ.10.0320	n.120432A>G
LinJ.10	131370	.	C	T	.	.	ANN=T	intergenic_region	MODIFIER	LinJ.10.0330-LinJ.10.0340	LinJ.10.0330-LinJ.10.0340	intergenic_region	LinJ.10.0330-LinJ.10.0340	n.131370C>T
LinJ.10	135697	.	A	C	.	.	ANN=C	missense_variant	MODERATE	LinJ.10.0340	LinJ.10.0340	transcript	LinJ.10.0340:mRNA	protein_coding	2019-01-01	c.3083A>C	p.Asp1028Ala	3083/5874	3083/5874	1028/1957
LinJ.10	146689	.	C	T	.	.	ANN=T	intergenic_region	MODIFIER	LinJ.10.0360-LinJ.10.0370	LinJ.10.0360-LinJ.10.0370	intergenic_region	LinJ.10.0360-LinJ.10.0370	n.146689C>T
LinJ.10	146695	.	T	C	.	.	ANN=C	intergenic_region	MODIFIER	LinJ.10.0360-LinJ.10.0370	LinJ.10.0360-LinJ.10.0370	intergenic_region	LinJ.10.0360-LinJ.10.0370	n.146695T>C
LinJ.10	147058	.	G	A	.	.	ANN=A	intergenic_region	MODIFIER	LinJ.10.0360-LinJ.10.0370	LinJ.10.0360-LinJ.10.0370	intergenic_region	LinJ.10.0360-LinJ.10.0370	n.147058G>A
LinJ.10	161146	.	T	C	.	.	ANN=C	intergenic_region	MODIFIER	LinJ.10.0380-LinJ.10.0390	LinJ.10.0380-LinJ.10.0390	intergenic_region	LinJ.10.0380-LinJ.10.0390	n.161146T>C
LinJ.10	161947	.	T	C	.	.	ANN=C	intergenic_region	MODIFIER	LinJ.10.0380-LinJ.10.0390	LinJ.10.0380-LinJ.10.0390	intergenic_region	LinJ.10.0380-LinJ.10.0390	n.161947T>C
LinJ.10	162690	.	A	C	.	.	ANN=C	intergenic_region	MODIFIER	LinJ.10.0380-LinJ.10.0390	LinJ.10.0380-LinJ.10.0390	intergenic_region	LinJ.10.0380-LinJ.10.0390	n.162690A>C
LinJ.10	233337	.	C	A	.	.	ANN=A	missense_variant	MODERATE	LinJ.10.0550	LinJ.10.0550	transcript	LinJ.10.0550:mRNA	protein_coding	2019-01-01	c.248C>A	p.Ala83Asp	248/20409	248/20409	83/6802
LinJ.10	233356	.	C	G	.	.	ANN=G	synonymous_variant	LOW	LinJ.10.0550	LinJ.10.0550	transcript	LinJ.10.0550:mRNA	protein_coding	2019-01-01	c.267C>G	p.Val89Val	267/20409	267/20409	89/6802
LinJ.10	358677	.	A	G	.	.	ANN=G	intergenic_region	MODIFIER	LinJ.10.0830-LinJ.10.0840	LinJ.10.0830-LinJ.10.0840	intergenic_region	LinJ.10.0830-LinJ.10.0840	n.358677A>G
LinJ.10	359648	.	A	G	.	.	ANN=G	intergenic_region	MODIFIER	LinJ.10.0830-LinJ.10.0840	LinJ.10.0830-LinJ.10.0840	intergenic_region	LinJ.10.0830-LinJ.10.0840	n.359648A>G
LinJ.10	360007	.	G	A	.	.	ANN=A	intergenic_region	MODIFIER	LinJ.10.0830-LinJ.10.0840	LinJ.10.0830-LinJ.10.0840	intergenic_region	LinJ.10.0830-LinJ.10.0840	n.360007G>A
LinJ.10	362150	.	G	C	.	.	ANN=C	intergenic_region	MODIFIER	LinJ.10.0840-LinJ.10.0850	LinJ.10.0840-LinJ.10.0850	intergenic_region	LinJ.10.0840-LinJ.10.0850	n.362150G>C
LinJ.10	366998	.	A	G	.	.	ANN=G	intergenic_region	MODIFIER	LinJ.10.0850-LinJ.10.0860	LinJ.10.0850-LinJ.10.0860	intergenic_region	LinJ.10.0850-LinJ.10.0860	n.366998A>G
LinJ.10	367522	.	A	G	.	.	ANN=G	intergenic_region	MODIFIER	LinJ.10.0850-LinJ.10.0860	LinJ.10.0850-LinJ.10.0860	intergenic_region	LinJ.10.0850-LinJ.10.0860	n.367522A>G
LinJ.10	369317	.	A	G	.	.	ANN=G	missense_variant	MODERATE	LinJ.10.0860	LinJ.10.0860	transcript	LinJ.10.0860:mRNA	protein_coding	2019-01-01	c.4519T>C	p.Ser1507Pro	4519/6222	4519/6222	1507/2073
LinJ.10	371226	.	A	G	.	.	ANN=G	synonymous_variant	LOW	LinJ.10.0860	LinJ.10.0860	transcript	LinJ.10.0860:mRNA	protein_coding	2019-01-01	c.2610T>C	p.Asn870Asn	2610/6222	2610/6222	870/2073
LinJ.10	374684	.	C	T	.	.	ANN=T	intergenic_region	MODIFIER	LinJ.10.0860-LinJ.10.0870	LinJ.10.0860-LinJ.10.0870	intergenic_region	LinJ.10.0860-LinJ.10.0870	n.374684C>T
LinJ.10	374869	.	C	A	.	.	ANN=A	intergenic_region	MODIFIER	LinJ.10.0860-LinJ.10.0870	LinJ.10.0860-LinJ.10.0870	intergenic_region	LinJ.10.0860-LinJ.10.0870	n.374869C>A
LinJ.10	395893	.	C	T	.	.	ANN=T	intergenic_region	MODIFIER	LinJ.10.0930-LinJ.10.0940	LinJ.10.0930-LinJ.10.0940	intergenic_region	LinJ.10.0930-LinJ.10.0940	n.395893C>T
LinJ.10	417061	.	A	G	.	.	ANN=G	synonymous_variant	LOW	LinJ.10.1010	LinJ.10.1010	transcript	LinJ.10.1010:mRNA	protein_coding	2019-01-01	c.945T>C	p.Ile315Ile	945/4002	945/4002	315/1333
LinJ.10	418075	.	C	A	.	.	ANN=A	intergenic_region	MODIFIER	LinJ.10.1010-LinJ.10.1020	LinJ.10.1010-LinJ.10.1020	intergenic_region	LinJ.10.1010-LinJ.10.1020	n.418075C>A
LinJ.10	419836	.	G	A	.	.	ANN=A	intergenic_region	MODIFIER	LinJ.10.1020-LinJ.10.1030	LinJ.10.1020-LinJ.10.1030	intergenic_region	LinJ.10.1020-LinJ.10.1030	n.419836G>A
LinJ.10	425347	.	A	G	.	.	ANN=G	missense_variant	MODERATE	LinJ.10.1040	LinJ.10.1040	transcript	LinJ.10.1040:mRNA	protein_coding	2019-01-01	c.805T>C	p.Cys269Arg	805/2421	805/2421	269/806
LinJ.10	426111	.	T	C	.	.	ANN=C	missense_variant	MODERATE	LinJ.10.1040	LinJ.10.1040	transcript	LinJ.10.1040:mRNA	protein_coding	2019-01-01	c.41A>G	p.His14Arg	41/2421	41/2421	14/806
LinJ.10	426227	.	T	C	.	.	ANN=C	intergenic_region	MODIFIER	LinJ.10.1040-LinJ.10.1050	LinJ.10.1040-LinJ.10.1050	intergenic_region	LinJ.10.1040-LinJ.10.1050	n.426227T>C
LinJ.10	426354	.	A	C	.	.	ANN=C	intergenic_region	MODIFIER	LinJ.10.1040-LinJ.10.1050	LinJ.10.1040-LinJ.10.1050	intergenic_region	LinJ.10.1040-LinJ.10.1050	n.426354A>C
LinJ.10	426589	.	A	G	.	.	ANN=G	intergenic_region	MODIFIER	LinJ.10.1040-LinJ.10.1050	LinJ.10.1040-LinJ.10.1050	intergenic_region	LinJ.10.1040-LinJ.10.1050	n.426589A>G
LinJ.10	428447	.	C	T	.	.	ANN=T	intergenic_region	MODIFIER	LinJ.10.1050-LinJ.10.1060	LinJ.10.1050-LinJ.10.1060	intergenic_region	LinJ.10.1050-LinJ.10.1060	n.428447C>T
LinJ.10	429265	.	C	T	.	.	ANN=T	intergenic_region	MODIFIER	LinJ.10.1050-LinJ.10.1060	LinJ.10.1050-LinJ.10.1060	intergenic_region	LinJ.10.1050-LinJ.10.1060	n.429265C>T
LinJ.10	430088	.	G	A	.	.	ANN=A	synonymous_variant	LOW	LinJ.10.1060	LinJ.10.1060	transcript	LinJ.10.1060:mRNA	protein_coding	2019-01-01	c.1293C>T	p.Asp431Asp	1293/1851	1293/1851	431/616
LinJ.10	430373	.	A	G	.	.	ANN=G	synonymous_variant	LOW	LinJ.10.1060	LinJ.10.1060	transcript	LinJ.10.1060:mRNA	protein_coding	2019-01-01	c.1008T>C	p.Gly336Gly	1008/1851	1008/1851	336/616
LinJ.10	431013	.	A	G	.	.	ANN=G	missense_variant	MODERATE	LinJ.10.1060	LinJ.10.1060	transcript	LinJ.10.1060:mRNA	protein_coding	2019-01-01	c.368T>C	p.Val123Ala	368/1851	368/1851	123/616
LinJ.10	431096	.	A	G	.	.	ANN=G	synonymous_variant	LOW	LinJ.10.1060	LinJ.10.1060	transcript	LinJ.10.1060:mRNA	protein_coding	2019-01-01	c.285T>C	p.Ala95Ala	285/1851	285/1851	95/616
LinJ.10	431223	.	G	A	.	.	ANN=A	missense_variant	MODERATE	LinJ.10.1060	LinJ.10.1060	transcript	LinJ.10.1060:mRNA	protein_coding	2019-01-01	c.158C>T	p.Ala53Val	158/1851	158/1851	53/616
LinJ.10	431265	.	C	T	.	.	ANN=T	missense_variant	MODERATE	LinJ.10.1060	LinJ.10.1060	transcript	LinJ.10.1060:mRNA	protein_coding	2019-01-01	c.116G>A	p.Arg39Gln	116/1851	116/1851	39/616
LinJ.10	431301	.	G	T	.	.	ANN=T	missense_variant	MODERATE	LinJ.10.1060	LinJ.10.1060	transcript	LinJ.10.1060:mRNA	protein_coding	2019-01-01	c.80C>A	p.Ala27Glu	80/1851	80/1851	27/616
LinJ.10	433490	.	T	C	.	.	ANN=C	synonymous_variant	LOW	LinJ.10.1080	LinJ.10.1080	transcript	LinJ.10.1080:mRNA	protein_coding	2019-01-01	c.1173A>G	p.Gln391Gln	1173/1203	1173/1203	391/400
LinJ.10	434051	.	C	T	.	.	ANN=T	synonymous_variant	LOW	LinJ.10.1080	LinJ.10.1080	transcript	LinJ.10.1080:mRNA	protein_coding	2019-01-01	c.612G>A	p.Gly204Gly	612/1203	612/1203	204/400
LinJ.10	434776	.	G	A	.	.	ANN=A	intergenic_region	MODIFIER	LinJ.10.1080-LinJ.10.1090	LinJ.10.1080-LinJ.10.1090	intergenic_region	LinJ.10.1080-LinJ.10.1090	n.434776G>A
LinJ.10	444950	.	A	G	.	.	ANN=G	synonymous_variant	LOW	LinJ.10.1120	LinJ.10.1120	transcript	LinJ.10.1120:mRNA	protein_coding	2019-01-01	c.2472T>C	p.Leu824Leu	2472/3672	2472/3672	824/1223
LinJ.10	452462	.	G	C	.	.	ANN=C	missense_variant	MODERATE	LinJ.10.1150	LinJ.10.1150	transcript	LinJ.10.1150:mRNA	protein_coding	2019-01-01	c.399C>G	p.Asp133Glu	399/1779	399/1779	133/592
LinJ.10	454468	.	G	A	.	.	ANN=A	intergenic_region	MODIFIER	LinJ.10.1150-LinJ.10.1160	LinJ.10.1150-LinJ.10.1160	intergenic_region	LinJ.10.1150-LinJ.10.1160	n.454468G>A
LinJ.10	454742	.	T	A	.	.	ANN=A	intergenic_region	MODIFIER	LinJ.10.1150-LinJ.10.1160	LinJ.10.1150-LinJ.10.1160	intergenic_region	LinJ.10.1150-LinJ.10.1160	n.454742T>A
LinJ.10	457613	.	T	A	.	.	ANN=A	missense_variant	MODERATE	LinJ.10.1160	LinJ.10.1160	transcript	LinJ.10.1160:mRNA	protein_coding	2019-01-01	c.280A>T	p.Thr94Ser	280/2196	280/2196	94/731
LinJ.10	457916	.	T	C	.	.	ANN=C	intergenic_region	MODIFIER	LinJ.10.1160-LinJ.10.1170	LinJ.10.1160-LinJ.10.1170	intergenic_region	LinJ.10.1160-LinJ.10.1170	n.457916T>C
LinJ.10	458072	.	T	C	.	.	ANN=C	intergenic_region	MODIFIER	LinJ.10.1160-LinJ.10.1170	LinJ.10.1160-LinJ.10.1170	intergenic_region	LinJ.10.1160-LinJ.10.1170	n.458072T>C
LinJ.10	458487	.	T	C	.	.	ANN=C	intergenic_region	MODIFIER	LinJ.10.1160-LinJ.10.1170	LinJ.10.1160-LinJ.10.1170	intergenic_region	LinJ.10.1160-LinJ.10.1170	n.458487T>C
LinJ.10	459908	.	T	C	.	.	ANN=C	missense_variant	MODERATE	LinJ.10.1170	LinJ.10.1170	transcript	LinJ.10.1170:mRNA	protein_coding	2019-01-01	c.1340A>G	p.Glu447Gly	1340/1959	1340/1959	447/652
LinJ.10	461026	.	C	T	.	.	ANN=T	synonymous_variant	LOW	LinJ.10.1170	LinJ.10.1170	transcript	LinJ.10.1170:mRNA	protein_coding	2019-01-01	c.222G>A	p.Lys74Lys	222/1959	222/1959	74/652
LinJ.10	466922	.	T	G	.	.	ANN=G	intergenic_region	MODIFIER	LinJ.10.1190-LinJ.10.1200	LinJ.10.1190-LinJ.10.1200	intergenic_region	LinJ.10.1190-LinJ.10.1200	n.466922T>G
LinJ.10	467410	.	T	G	.	.	ANN=G	intergenic_region	MODIFIER	LinJ.10.1190-LinJ.10.1200	LinJ.10.1190-LinJ.10.1200	intergenic_region	LinJ.10.1190-LinJ.10.1200	n.467410T>G
LinJ.10	469427	.	A	G	.	.	ANN=G	synonymous_variant	LOW	LinJ.10.1200	LinJ.10.1200	transcript	LinJ.10.1200:mRNA	protein_coding	2019-01-01	c.76T>C	p.Leu26Leu	76/1572	76/1572	26/523
LinJ.10	469674	.	A	G	.	.	ANN=G	intergenic_region	MODIFIER	LinJ.10.1200-LinJ.10.1210	LinJ.10.1200-LinJ.10.1210	intergenic_region	LinJ.10.1200-LinJ.10.1210	n.469674A>G
LinJ.10	470137	.	A	G	.	.	ANN=G	intergenic_region	MODIFIER	LinJ.10.1200-LinJ.10.1210	LinJ.10.1200-LinJ.10.1210	intergenic_region	LinJ.10.1200-LinJ.10.1210	n.470137A>G
LinJ.10	470166	.	T	C	.	.	ANN=C	intergenic_region	MODIFIER	LinJ.10.1200-LinJ.10.1210	LinJ.10.1200-LinJ.10.1210	intergenic_region	LinJ.10.1200-LinJ.10.1210	n.470166T>C
LinJ.10	470240	.	G	A	.	.	ANN=A	intergenic_region	MODIFIER	LinJ.10.1200-LinJ.10.1210	LinJ.10.1200-LinJ.10.1210	intergenic_region	LinJ.10.1200-LinJ.10.1210	n.470240G>A
LinJ.10	470244	.	A	G	.	.	ANN=G	intergenic_region	MODIFIER	LinJ.10.1200-LinJ.10.1210	LinJ.10.1200-LinJ.10.1210	intergenic_region	LinJ.10.1200-LinJ.10.1210	n.470244A>G
LinJ.10	470269	.	C	T	.	.	ANN=T	intergenic_region	MODIFIER	LinJ.10.1200-LinJ.10.1210	LinJ.10.1200-LinJ.10.1210	intergenic_region	LinJ.10.1200-LinJ.10.1210	n.470269C>T
LinJ.10	470779	.	C	T	.	.	ANN=T	synonymous_variant	LOW	LinJ.10.1210	LinJ.10.1210	transcript	LinJ.10.1210:mRNA	protein_coding	2019-01-01	c.243G>A	p.Thr81Thr	243/420	243/420	81/139
LinJ.10	472620	.	T	C	.	.	ANN=C	synonymous_variant	LOW	LinJ.10.1220	LinJ.10.1220	transcript	LinJ.10.1220:mRNA	protein_coding	2019-01-01	c.4107A>G	p.Gln1369Gln	4107/4584	4107/4584	1369/1527
LinJ.10	477049	.	G	A	.	.	ANN=A	intergenic_region	MODIFIER	LinJ.10.1220-LinJ.10.1230	LinJ.10.1220-LinJ.10.1230	intergenic_region	LinJ.10.1220-LinJ.10.1230	n.477049G>A
LinJ.10	480855	.	G	A	.	.	ANN=A	intergenic_region	MODIFIER	LinJ.10.1230-LinJ.10.1240	LinJ.10.1230-LinJ.10.1240	intergenic_region	LinJ.10.1230-LinJ.10.1240	n.480855G>A
LinJ.10	480863	.	G	A	.	.	ANN=A	intergenic_region	MODIFIER	LinJ.10.1230-LinJ.10.1240	LinJ.10.1230-LinJ.10.1240	intergenic_region	LinJ.10.1230-LinJ.10.1240	n.480863G>A
LinJ.10	480964	.	A	G	.	.	ANN=G	intergenic_region	MODIFIER	LinJ.10.1230-LinJ.10.1240	LinJ.10.1230-LinJ.10.1240	intergenic_region	LinJ.10.1230-LinJ.10.1240	n.480964A>G
LinJ.10	481377	.	G	C	.	.	ANN=C	synonymous_variant	LOW	LinJ.10.1240	LinJ.10.1240	transcript	LinJ.10.1240:mRNA	protein_coding	2019-01-01	c.1047C>G	p.Arg349Arg	1047/1443	1047/1443	349/480
LinJ.10	481440	.	A	G	.	.	ANN=G	synonymous_variant	LOW	LinJ.10.1240	LinJ.10.1240	transcript	LinJ.10.1240:mRNA	protein_coding	2019-01-01	c.984T>C	p.Val328Val	984/1443	984/1443	328/480
LinJ.10	481623	.	C	T	.	.	ANN=T	synonymous_variant	LOW	LinJ.10.1240	LinJ.10.1240	transcript	LinJ.10.1240:mRNA	protein_coding	2019-01-01	c.801G>A	p.Arg267Arg	801/1443	801/1443	267/480
LinJ.10	482223	.	G	C	.	.	ANN=C	synonymous_variant	LOW	LinJ.10.1240	LinJ.10.1240	transcript	LinJ.10.1240:mRNA	protein_coding	2019-01-01	c.201C>G	p.Ala67Ala	201/1443	201/1443	67/480
LinJ.10	482862	.	A	G	.	.	ANN=G	intergenic_region	MODIFIER	LinJ.10.1240-LinJ.10.1250	LinJ.10.1240-LinJ.10.1250	intergenic_region	LinJ.10.1240-LinJ.10.1250	n.482862A>G
LinJ.10	486903	.	G	A	.	.	ANN=A	intergenic_region	MODIFIER	LinJ.10.1250-LinJ.10.1260	LinJ.10.1250-LinJ.10.1260	intergenic_region	LinJ.10.1250-LinJ.10.1260	n.486903G>A
LinJ.10	488135	.	T	C	.	.	ANN=C	intergenic_region	MODIFIER	LinJ.10.1260-LinJ.10.1270	LinJ.10.1260-LinJ.10.1270	intergenic_region	LinJ.10.1260-LinJ.10.1270	n.488135T>C
LinJ.10	488298	.	G	C	.	.	ANN=C	intergenic_region	MODIFIER	LinJ.10.1260-LinJ.10.1270	LinJ.10.1260-LinJ.10.1270	intergenic_region	LinJ.10.1260-LinJ.10.1270	n.488298G>C
LinJ.10	488797	.	T	C	.	.	ANN=C	intergenic_region	MODIFIER	LinJ.10.1260-LinJ.10.1270	LinJ.10.1260-LinJ.10.1270	intergenic_region	LinJ.10.1260-LinJ.10.1270	n.488797T>C
LinJ.10	488960	.	A	G	.	.	ANN=G	intergenic_region	MODIFIER	LinJ.10.1260-LinJ.10.1270	LinJ.10.1260-LinJ.10.1270	intergenic_region	LinJ.10.1260-LinJ.10.1270	n.488960A>G
LinJ.10	489688	.	T	C	.	.	ANN=C	intergenic_region	MODIFIER	LinJ.10.1260-LinJ.10.1270	LinJ.10.1260-LinJ.10.1270	intergenic_region	LinJ.10.1260-LinJ.10.1270	n.489688T>C
LinJ.10	494193	.	T	C	.	.	ANN=C	intergenic_region	MODIFIER	LinJ.10.1280-LinJ.10.1290	LinJ.10.1280-LinJ.10.1290	intergenic_region	LinJ.10.1280-LinJ.10.1290	n.494193T>C
LinJ.10	494589	.	C	A	.	.	ANN=A	intergenic_region	MODIFIER	LinJ.10.1280-LinJ.10.1290	LinJ.10.1280-LinJ.10.1290	intergenic_region	LinJ.10.1280-LinJ.10.1290	n.494589C>A
LinJ.10	496553	.	A	C	.	.	ANN=C	intergenic_region	MODIFIER	LinJ.10.1290-LinJ.10.1300	LinJ.10.1290-LinJ.10.1300	intergenic_region	LinJ.10.1290-LinJ.10.1300	n.496553A>C
LinJ.10	497826	.	T	C	.	.	ANN=C	synonymous_variant	LOW	LinJ.10.1300	LinJ.10.1300	transcript	LinJ.10.1300:mRNA	protein_coding	2019-01-01	c.2097A>G	p.Thr699Thr	2097/3189	2097/3189	699/1062
LinJ.10	499193	.	C	T	.	.	ANN=T	missense_variant	MODERATE	LinJ.10.1300	LinJ.10.1300	transcript	LinJ.10.1300:mRNA	protein_coding	2019-01-01	c.730G>A	p.Ala244Thr	730/3189	730/3189	244/1062
LinJ.10	503081	.	A	G	.	.	ANN=G	missense_variant	MODERATE	LinJ.10.1310	LinJ.10.1310	transcript	LinJ.10.1310:mRNA	protein_coding	2019-01-01	c.149T>C	p.Val50Ala	149/1704	149/1704	50/567
LinJ.10	512177	.	C	T	.	.	ANN=T	intergenic_region	MODIFIER	LinJ.10.1360-LinJ.10.1370	LinJ.10.1360-LinJ.10.1370	intergenic_region	LinJ.10.1360-LinJ.10.1370	n.512177C>T
LinJ.10	516740	.	C	T	.	.	ANN=T	intergenic_region	MODIFIER	LinJ.10.1380-LinJ.10.1390	LinJ.10.1380-LinJ.10.1390	intergenic_region	LinJ.10.1380-LinJ.10.1390	n.516740C>T
LinJ.10	517605	.	A	C	.	.	ANN=C	intergenic_region	MODIFIER	LinJ.10.1380-LinJ.10.1390	LinJ.10.1380-LinJ.10.1390	intergenic_region	LinJ.10.1380-LinJ.10.1390	n.517605A>C
LinJ.10	518393	.	T	C	.	.	ANN=C	synonymous_variant	LOW	LinJ.10.1390	LinJ.10.1390	transcript	LinJ.10.1390:mRNA	protein_coding	2019-01-01	c.714T>C	p.Phe238Phe	714/957	714/957	238/318
LinJ.10	518582	.	C	T	.	.	ANN=T	synonymous_variant	LOW	LinJ.10.1390	LinJ.10.1390	transcript	LinJ.10.1390:mRNA	protein_coding	2019-01-01	c.903C>T	p.Thr301Thr	903/957	903/957	301/318
LinJ.10	518585	.	T	C	.	.	ANN=C	synonymous_variant	LOW	LinJ.10.1390	LinJ.10.1390	transcript	LinJ.10.1390:mRNA	protein_coding	2019-01-01	c.906T>C	p.Ile302Ile	906/957	906/957	302/318
LinJ.10	518586	.	G	A	.	.	ANN=A	missense_variant	MODERATE	LinJ.10.1390	LinJ.10.1390	transcript	LinJ.10.1390:mRNA	protein_coding	2019-01-01	c.907G>A	p.Asp303Asn	907/957	907/957	303/318
LinJ.10	519567	.	A	G	.	.	ANN=G	intergenic_region	MODIFIER	LinJ.10.1390-LinJ.10.1400	LinJ.10.1390-LinJ.10.1400	intergenic_region	LinJ.10.1390-LinJ.10.1400	n.519567A>G
LinJ.10	519673	.	G	A	.	.	ANN=A	intergenic_region	MODIFIER	LinJ.10.1390-LinJ.10.1400	LinJ.10.1390-LinJ.10.1400	intergenic_region	LinJ.10.1390-LinJ.10.1400	n.519673G>A
LinJ.10	519691	.	A	T	.	.	ANN=T	intergenic_region	MODIFIER	LinJ.10.1390-LinJ.10.1400	LinJ.10.1390-LinJ.10.1400	intergenic_region	LinJ.10.1390-LinJ.10.1400	n.519691A>T
LinJ.10	520162	.	A	G	.	.	ANN=G	intergenic_region	MODIFIER	LinJ.10.1390-LinJ.10.1400	LinJ.10.1390-LinJ.10.1400	intergenic_region	LinJ.10.1390-LinJ.10.1400	n.520162A>G
LinJ.10	520391	.	T	C	.	.	ANN=C	intergenic_region	MODIFIER	LinJ.10.1390-LinJ.10.1400	LinJ.10.1390-LinJ.10.1400	intergenic_region	LinJ.10.1390-LinJ.10.1400	n.520391T>C
LinJ.10	520422	.	G	T	.	.	ANN=T	intergenic_region	MODIFIER	LinJ.10.1390-LinJ.10.1400	LinJ.10.1390-LinJ.10.1400	intergenic_region	LinJ.10.1390-LinJ.10.1400	n.520422G>T
LinJ.10	520819	.	T	C	.	.	ANN=C	intergenic_region	MODIFIER	LinJ.10.1390-LinJ.10.1400	LinJ.10.1390-LinJ.10.1400	intergenic_region	LinJ.10.1390-LinJ.10.1400	n.520819T>C
LinJ.10	520868	.	C	A	.	.	ANN=A	intergenic_region	MODIFIER	LinJ.10.1390-LinJ.10.1400	LinJ.10.1390-LinJ.10.1400	intergenic_region	LinJ.10.1390-LinJ.10.1400	n.520868C>A
LinJ.10	520900	.	T	C	.	.	ANN=C	intergenic_region	MODIFIER	LinJ.10.1390-LinJ.10.1400	LinJ.10.1390-LinJ.10.1400	intergenic_region	LinJ.10.1390-LinJ.10.1400	n.520900T>C
LinJ.11	74759	.	T	C	.	.	ANN=C	intergenic_region	MODIFIER	LinJ.11.0250-LinJ.11.0260	LinJ.11.0250-LinJ.11.0260	intergenic_region	LinJ.11.0250-LinJ.11.0260	n.74759T>C
LinJ.11	77819	.	T	C	.	.	ANN=C	intergenic_region	MODIFIER	LinJ.11.0260-LinJ.11.0270	LinJ.11.0260-LinJ.11.0270	intergenic_region	LinJ.11.0260-LinJ.11.0270	n.77819T>C
LinJ.11	78211	.	T	C	.	.	ANN=C	intergenic_region	MODIFIER	LinJ.11.0260-LinJ.11.0270	LinJ.11.0260-LinJ.11.0270	intergenic_region	LinJ.11.0260-LinJ.11.0270	n.78211T>C
LinJ.11	80546	.	A	C	.	.	ANN=C	intergenic_region	MODIFIER	LinJ.11.0270-LinJ.11.0280	LinJ.11.0270-LinJ.11.0280	intergenic_region	LinJ.11.0270-LinJ.11.0280	n.80546A>C
LinJ.11	80677	.	G	A	.	.	ANN=A	intergenic_region	MODIFIER	LinJ.11.0270-LinJ.11.0280	LinJ.11.0270-LinJ.11.0280	intergenic_region	LinJ.11.0270-LinJ.11.0280	n.80677G>A
LinJ.11	82559	.	C	A	.	.	ANN=A	intergenic_region	MODIFIER	LinJ.11.0270-LinJ.11.0280	LinJ.11.0270-LinJ.11.0280	intergenic_region	LinJ.11.0270-LinJ.11.0280	n.82559C>A
LinJ.11	103622	.	G	A	.	.	ANN=A	intergenic_region	MODIFIER	LinJ.11.0320-LinJ.11.0330	LinJ.11.0320-LinJ.11.0330	intergenic_region	LinJ.11.0320-LinJ.11.0330	n.103622G>A
LinJ.11	103958	.	A	G	.	.	ANN=G	intergenic_region	MODIFIER	LinJ.11.0320-LinJ.11.0330	LinJ.11.0320-LinJ.11.0330	intergenic_region	LinJ.11.0320-LinJ.11.0330	n.103958A>G
LinJ.11	104049	.	C	A	.	.	ANN=A	intergenic_region	MODIFIER	LinJ.11.0320-LinJ.11.0330	LinJ.11.0320-LinJ.11.0330	intergenic_region	LinJ.11.0320-LinJ.11.0330	n.104049C>A
LinJ.11	104553	.	T	C	.	.	ANN=C	intergenic_region	MODIFIER	LinJ.11.0320-LinJ.11.0330	LinJ.11.0320-LinJ.11.0330	intergenic_region	LinJ.11.0320-LinJ.11.0330	n.104553T>C
LinJ.11	104686	.	A	C	.	.	ANN=C	intergenic_region	MODIFIER	LinJ.11.0320-LinJ.11.0330	LinJ.11.0320-LinJ.11.0330	intergenic_region	LinJ.11.0320-LinJ.11.0330	n.104686A>C
LinJ.11	104701	.	T	G	.	.	ANN=G	intergenic_region	MODIFIER	LinJ.11.0320-LinJ.11.0330	LinJ.11.0320-LinJ.11.0330	intergenic_region	LinJ.11.0320-LinJ.11.0330	n.104701T>G
LinJ.11	104962	.	A	G	.	.	ANN=G	intergenic_region	MODIFIER	LinJ.11.0320-LinJ.11.0330	LinJ.11.0320-LinJ.11.0330	intergenic_region	LinJ.11.0320-LinJ.11.0330	n.104962A>G
LinJ.11	149731	.	T	C	.	.	ANN=C	synonymous_variant	LOW	LinJ.11.0440	LinJ.11.0440	transcript	LinJ.11.0440:mRNA	protein_coding	2019-01-01	c.342T>C	p.Val114Val	342/1743	342/1743	114/580
LinJ.11	149816	.	C	T	.	.	ANN=T	synonymous_variant	LOW	LinJ.11.0440	LinJ.11.0440	transcript	LinJ.11.0440:mRNA	protein_coding	2019-01-01	c.427C>T	p.Leu143Leu	427/1743	427/1743	143/580
LinJ.11	150856	.	G	A	.	.	ANN=A	synonymous_variant	LOW	LinJ.11.0440	LinJ.11.0440	transcript	LinJ.11.0440:mRNA	protein_coding	2019-01-01	c.1467G>A	p.Ser489Ser	1467/1743	1467/1743	489/580
LinJ.11	160785	.	A	G	.	.	ANN=G	start_lost	HIGH	LinJ.11.0480	LinJ.11.0480	transcript	LinJ.11.0480:mRNA	protein_coding	2019-01-01	c.1A>G	p.Met1?	1/1647	1/1647	1/548	;LOF=(LinJ.11.0480	LinJ.11.0480	1	1.00)
LinJ.11	160812	.	G	A	.	.	ANN=A	missense_variant	MODERATE	LinJ.11.0480	LinJ.11.0480	transcript	LinJ.11.0480:mRNA	protein_coding	2019-01-01	c.28G>A	p.Gly10Arg	28/1647	28/1647	10/548
LinJ.11	161163	.	T	C	.	.	ANN=C	missense_variant	MODERATE	LinJ.11.0480	LinJ.11.0480	transcript	LinJ.11.0480:mRNA	protein_coding	2019-01-01	c.379T>C	p.Ser127Pro	379/1647	379/1647	127/548
LinJ.11	161851	.	C	G	.	.	ANN=G	missense_variant	MODERATE	LinJ.11.0480	LinJ.11.0480	transcript	LinJ.11.0480:mRNA	protein_coding	2019-01-01	c.1067C>G	p.Ser356Cys	1067/1647	1067/1647	356/548
LinJ.11	162239	.	C	T	.	.	ANN=T	synonymous_variant	LOW	LinJ.11.0480	LinJ.11.0480	transcript	LinJ.11.0480:mRNA	protein_coding	2019-01-01	c.1455C>T	p.Asp485Asp	1455/1647	1455/1647	485/548
LinJ.11	162516	.	G	A	.	.	ANN=A	intergenic_region	MODIFIER	LinJ.11.0480-LinJ.11.0490	LinJ.11.0480-LinJ.11.0490	intergenic_region	LinJ.11.0480-LinJ.11.0490	n.162516G>A
LinJ.11	163787	.	G	A	.	.	ANN=A	intergenic_region	MODIFIER	LinJ.11.0480-LinJ.11.0490	LinJ.11.0480-LinJ.11.0490	intergenic_region	LinJ.11.0480-LinJ.11.0490	n.163787G>A
LinJ.11	164217	.	T	G	.	.	ANN=G	intergenic_region	MODIFIER	LinJ.11.0480-LinJ.11.0490	LinJ.11.0480-LinJ.11.0490	intergenic_region	LinJ.11.0480-LinJ.11.0490	n.164217T>G
LinJ.11	164368	.	T	C	.	.	ANN=C	intergenic_region	MODIFIER	LinJ.11.0480-LinJ.11.0490	LinJ.11.0480-LinJ.11.0490	intergenic_region	LinJ.11.0480-LinJ.11.0490	n.164368T>C
LinJ.11	165004	.	G	C	.	.	ANN=C	intergenic_region	MODIFIER	LinJ.11.0480-LinJ.11.0490	LinJ.11.0480-LinJ.11.0490	intergenic_region	LinJ.11.0480-LinJ.11.0490	n.165004G>C
LinJ.11	165115	.	G	A	.	.	ANN=A	intergenic_region	MODIFIER	LinJ.11.0480-LinJ.11.0490	LinJ.11.0480-LinJ.11.0490	intergenic_region	LinJ.11.0480-LinJ.11.0490	n.165115G>A
LinJ.11	165310	.	T	G	.	.	ANN=G	intergenic_region	MODIFIER	LinJ.11.0480-LinJ.11.0490	LinJ.11.0480-LinJ.11.0490	intergenic_region	LinJ.11.0480-LinJ.11.0490	n.165310T>G
LinJ.11	165372	.	G	A	.	.	ANN=A	intergenic_region	MODIFIER	LinJ.11.0480-LinJ.11.0490	LinJ.11.0480-LinJ.11.0490	intergenic_region	LinJ.11.0480-LinJ.11.0490	n.165372G>A
LinJ.11	165376	.	A	T	.	.	ANN=T	intergenic_region	MODIFIER	LinJ.11.0480-LinJ.11.0490	LinJ.11.0480-LinJ.11.0490	intergenic_region	LinJ.11.0480-LinJ.11.0490	n.165376A>T
LinJ.11	165804	.	C	G	.	.	ANN=G	intergenic_region	MODIFIER	LinJ.11.0480-LinJ.11.0490	LinJ.11.0480-LinJ.11.0490	intergenic_region	LinJ.11.0480-LinJ.11.0490	n.165804C>G
LinJ.11	171418	.	C	T	.	.	ANN=T	intergenic_region	MODIFIER	LinJ.11.0490-LinJ.11.0500	LinJ.11.0490-LinJ.11.0500	intergenic_region	LinJ.11.0490-LinJ.11.0500	n.171418C>T
LinJ.11	171653	.	C	T	.	.	ANN=T	intergenic_region	MODIFIER	LinJ.11.0490-LinJ.11.0500	LinJ.11.0490-LinJ.11.0500	intergenic_region	LinJ.11.0490-LinJ.11.0500	n.171653C>T
LinJ.11	171684	.	T	C	.	.	ANN=C	intergenic_region	MODIFIER	LinJ.11.0490-LinJ.11.0500	LinJ.11.0490-LinJ.11.0500	intergenic_region	LinJ.11.0490-LinJ.11.0500	n.171684T>C
LinJ.11	172405	.	G	C	.	.	ANN=C	missense_variant	MODERATE	LinJ.11.0500	LinJ.11.0500	transcript	LinJ.11.0500:pseudogenic_transcript	protein_coding	2019-04-04	c.1425C>G	p.Asp475Glu	1425/1500	1425/1500	475/499	WARNING_TRANSCRIPT_MULTIPLE_STOP_CODONS
LinJ.11	172479	.	A	G	.	.	ANN=G	missense_variant	MODERATE	LinJ.11.0500	LinJ.11.0500	transcript	LinJ.11.0500:pseudogenic_transcript	protein_coding	2019-04-04	c.1351T>C	p.Tyr451His	1351/1500	1351/1500	451/499	WARNING_TRANSCRIPT_MULTIPLE_STOP_CODONS
LinJ.11	172650	.	C	T	.	.	ANN=T	synonymous_variant	LOW	LinJ.11.0500	LinJ.11.0500	transcript	LinJ.11.0500:pseudogenic_transcript	protein_coding	2019-04-03	c.1182G>A	p.Leu394Leu	1182/1500	1182/1500	394/499	WARNING_TRANSCRIPT_MULTIPLE_STOP_CODONS
LinJ.11	172747	.	C	G	.	.	ANN=G	missense_variant	MODERATE	LinJ.11.0500	LinJ.11.0500	transcript	LinJ.11.0500:pseudogenic_transcript	protein_coding	2019-04-03	c.1085G>C	p.Gly362Ala	1085/1500	1085/1500	362/499	WARNING_TRANSCRIPT_MULTIPLE_STOP_CODONS
LinJ.11	173159	.	C	T	.	.	ANN=T	synonymous_variant	LOW	LinJ.11.0500	LinJ.11.0500	transcript	LinJ.11.0500:pseudogenic_transcript	protein_coding	2019-04-02	c.675G>A	p.Leu225Leu	675/1500	675/1500	225/499	WARNING_TRANSCRIPT_MULTIPLE_STOP_CODONS
LinJ.11	173201	.	G	A	.	.	ANN=A	synonymous_variant	LOW	LinJ.11.0500	LinJ.11.0500	transcript	LinJ.11.0500:pseudogenic_transcript	protein_coding	2019-04-02	c.633C>T	p.Cys211Cys	633/1500	633/1500	211/499	WARNING_TRANSCRIPT_MULTIPLE_STOP_CODONS
LinJ.11	173286	.	A	G	.	.	ANN=G	missense_variant	MODERATE	LinJ.11.0500	LinJ.11.0500	transcript	LinJ.11.0500:pseudogenic_transcript	protein_coding	2019-04-02	c.548T>C	p.Val183Ala	548/1500	548/1500	183/499	WARNING_TRANSCRIPT_MULTIPLE_STOP_CODONS
LinJ.11	179442	.	T	G	.	.	ANN=G	intergenic_region	MODIFIER	LinJ.11.0510-LinJ.11.0520	LinJ.11.0510-LinJ.11.0520	intergenic_region	LinJ.11.0510-LinJ.11.0520	n.179442T>G
LinJ.11	189572	.	C	T	.	.	ANN=T	intergenic_region	MODIFIER	LinJ.11.0530-LinJ.11.0540	LinJ.11.0530-LinJ.11.0540	intergenic_region	LinJ.11.0530-LinJ.11.0540	n.189572C>T
LinJ.11	189619	.	G	A	.	.	ANN=A	intergenic_region	MODIFIER	LinJ.11.0530-LinJ.11.0540	LinJ.11.0530-LinJ.11.0540	intergenic_region	LinJ.11.0530-LinJ.11.0540	n.189619G>A
LinJ.11	190952	.	A	G	.	.	ANN=G	synonymous_variant	LOW	LinJ.11.0540	LinJ.11.0540	transcript	LinJ.11.0540:mRNA	protein_coding	2019-01-01	c.993T>C	p.Ser331Ser	993/2163	993/2163	331/720
LinJ.11	195475	.	A	G	.	.	ANN=G	intergenic_region	MODIFIER	LinJ.11.0550-LinJ.11.0560	LinJ.11.0550-LinJ.11.0560	intergenic_region	LinJ.11.0550-LinJ.11.0560	n.195475A>G
LinJ.11	195982	.	A	G	.	.	ANN=G	intergenic_region	MODIFIER	LinJ.11.0550-LinJ.11.0560	LinJ.11.0550-LinJ.11.0560	intergenic_region	LinJ.11.0550-LinJ.11.0560	n.195982A>G
LinJ.11	196027	.	C	G	.	.	ANN=G	intergenic_region	MODIFIER	LinJ.11.0550-LinJ.11.0560	LinJ.11.0550-LinJ.11.0560	intergenic_region	LinJ.11.0550-LinJ.11.0560	n.196027C>G
LinJ.11	197477	.	C	T	.	.	ANN=T	intergenic_region	MODIFIER	LinJ.11.0550-LinJ.11.0560	LinJ.11.0550-LinJ.11.0560	intergenic_region	LinJ.11.0550-LinJ.11.0560	n.197477C>T
LinJ.11	198179	.	T	C	.	.	ANN=C	intergenic_region	MODIFIER	LinJ.11.0550-LinJ.11.0560	LinJ.11.0550-LinJ.11.0560	intergenic_region	LinJ.11.0550-LinJ.11.0560	n.198179T>C
LinJ.11	198289	.	C	T	.	.	ANN=T	intergenic_region	MODIFIER	LinJ.11.0550-LinJ.11.0560	LinJ.11.0550-LinJ.11.0560	intergenic_region	LinJ.11.0550-LinJ.11.0560	n.198289C>T
LinJ.11	198344	.	C	T	.	.	ANN=T	intergenic_region	MODIFIER	LinJ.11.0550-LinJ.11.0560	LinJ.11.0550-LinJ.11.0560	intergenic_region	LinJ.11.0550-LinJ.11.0560	n.198344C>T
LinJ.11	198459	.	G	T	.	.	ANN=T	intergenic_region	MODIFIER	LinJ.11.0550-LinJ.11.0560	LinJ.11.0550-LinJ.11.0560	intergenic_region	LinJ.11.0550-LinJ.11.0560	n.198459G>T
LinJ.11	198598	.	A	C	.	.	ANN=C	intergenic_region	MODIFIER	LinJ.11.0550-LinJ.11.0560	LinJ.11.0550-LinJ.11.0560	intergenic_region	LinJ.11.0550-LinJ.11.0560	n.198598A>C
LinJ.11	199222	.	G	A	.	.	ANN=A	synonymous_variant	LOW	LinJ.11.0560	LinJ.11.0560	transcript	LinJ.11.0560:mRNA	protein_coding	2019-01-01	c.1389C>T	p.Val463Val	1389/1737	1389/1737	463/578
LinJ.11	200359	.	G	A	.	.	ANN=A	synonymous_variant	LOW	LinJ.11.0560	LinJ.11.0560	transcript	LinJ.11.0560:mRNA	protein_coding	2019-01-01	c.252C>T	p.Asn84Asn	252/1737	252/1737	84/578
LinJ.11	200822	.	A	G	.	.	ANN=G	intergenic_region	MODIFIER	LinJ.11.0560-LinJ.11.0570	LinJ.11.0560-LinJ.11.0570	intergenic_region	LinJ.11.0560-LinJ.11.0570	n.200822A>G
LinJ.11	201544	.	T	C	.	.	ANN=C	intergenic_region	MODIFIER	LinJ.11.0560-LinJ.11.0570	LinJ.11.0560-LinJ.11.0570	intergenic_region	LinJ.11.0560-LinJ.11.0570	n.201544T>C
LinJ.11	202305	.	A	G	.	.	ANN=G	intergenic_region	MODIFIER	LinJ.11.0560-LinJ.11.0570	LinJ.11.0560-LinJ.11.0570	intergenic_region	LinJ.11.0560-LinJ.11.0570	n.202305A>G
LinJ.11	202385	.	T	G	.	.	ANN=G	intergenic_region	MODIFIER	LinJ.11.0560-LinJ.11.0570	LinJ.11.0560-LinJ.11.0570	intergenic_region	LinJ.11.0560-LinJ.11.0570	n.202385T>G
LinJ.11	202686	.	T	C	.	.	ANN=C	intergenic_region	MODIFIER	LinJ.11.0560-LinJ.11.0570	LinJ.11.0560-LinJ.11.0570	intergenic_region	LinJ.11.0560-LinJ.11.0570	n.202686T>C
LinJ.11	202688	.	G	A	.	.	ANN=A	intergenic_region	MODIFIER	LinJ.11.0560-LinJ.11.0570	LinJ.11.0560-LinJ.11.0570	intergenic_region	LinJ.11.0560-LinJ.11.0570	n.202688G>A
LinJ.11	202810	.	T	C	.	.	ANN=C	intergenic_region	MODIFIER	LinJ.11.0560-LinJ.11.0570	LinJ.11.0560-LinJ.11.0570	intergenic_region	LinJ.11.0560-LinJ.11.0570	n.202810T>C
LinJ.11	208551	.	A	G	.	.	ANN=G	synonymous_variant	LOW	LinJ.11.0590	LinJ.11.0590	transcript	LinJ.11.0590:mRNA	protein_coding	2019-01-01	c.1371T>C	p.Phe457Phe	1371/3183	1371/3183	457/1060
LinJ.11	210480	.	G	A	.	.	ANN=A	intergenic_region	MODIFIER	LinJ.11.0590-LinJ.11.tRNA1	LinJ.11.0590-LinJ.11.tRNA1	intergenic_region	LinJ.11.0590-LinJ.11.tRNA1	n.210480G>A
LinJ.11	211329	.	C	T	.	.	ANN=T	intergenic_region	MODIFIER	LinJ.11.0590-LinJ.11.tRNA1	LinJ.11.0590-LinJ.11.tRNA1	intergenic_region	LinJ.11.0590-LinJ.11.tRNA1	n.211329C>T
LinJ.11	211417	.	A	G	.	.	ANN=G	intergenic_region	MODIFIER	LinJ.11.0590-LinJ.11.tRNA1	LinJ.11.0590-LinJ.11.tRNA1	intergenic_region	LinJ.11.0590-LinJ.11.tRNA1	n.211417A>G
LinJ.11	211461	.	A	C	.	.	ANN=C	intergenic_region	MODIFIER	LinJ.11.0590-LinJ.11.tRNA1	LinJ.11.0590-LinJ.11.tRNA1	intergenic_region	LinJ.11.0590-LinJ.11.tRNA1	n.211461A>C
LinJ.11	211631	.	G	A	.	.	ANN=A	intergenic_region	MODIFIER	LinJ.11.0590-LinJ.11.tRNA1	LinJ.11.0590-LinJ.11.tRNA1	intergenic_region	LinJ.11.0590-LinJ.11.tRNA1	n.211631G>A
LinJ.11	212541	.	C	A	.	.	ANN=A	intergenic_region	MODIFIER	LinJ.11.tRNA1-LinJ.11.0600	LinJ.11.tRNA1-LinJ.11.0600	intergenic_region	LinJ.11.tRNA1-LinJ.11.0600	n.212541C>A
LinJ.11	212565	.	T	A	.	.	ANN=A	intergenic_region	MODIFIER	LinJ.11.tRNA1-LinJ.11.0600	LinJ.11.tRNA1-LinJ.11.0600	intergenic_region	LinJ.11.tRNA1-LinJ.11.0600	n.212565T>A
LinJ.11	212830	.	G	A	.	.	ANN=A	intergenic_region	MODIFIER	LinJ.11.tRNA1-LinJ.11.0600	LinJ.11.tRNA1-LinJ.11.0600	intergenic_region	LinJ.11.tRNA1-LinJ.11.0600	n.212830G>A
LinJ.11	212848	.	G	A	.	.	ANN=A	intergenic_region	MODIFIER	LinJ.11.tRNA1-LinJ.11.0600	LinJ.11.tRNA1-LinJ.11.0600	intergenic_region	LinJ.11.tRNA1-LinJ.11.0600	n.212848G>A
LinJ.11	212934	.	G	A	.	.	ANN=A	intergenic_region	MODIFIER	LinJ.11.tRNA1-LinJ.11.0600	LinJ.11.tRNA1-LinJ.11.0600	intergenic_region	LinJ.11.tRNA1-LinJ.11.0600	n.212934G>A
LinJ.11	213087	.	A	T	.	.	ANN=T	intergenic_region	MODIFIER	LinJ.11.tRNA1-LinJ.11.0600	LinJ.11.tRNA1-LinJ.11.0600	intergenic_region	LinJ.11.tRNA1-LinJ.11.0600	n.213087A>T
LinJ.11	251885	.	C	T	.	.	ANN=T	intergenic_region	MODIFIER	LinJ.11.0650-LinJ.11.0660	LinJ.11.0650-LinJ.11.0660	intergenic_region	LinJ.11.0650-LinJ.11.0660	n.251885C>T
LinJ.11	260762	.	A	C	.	.	ANN=C	missense_variant	MODERATE	LinJ.11.0670	LinJ.11.0670	transcript	LinJ.11.0670:mRNA	protein_coding	2019-01-01	c.1609A>C	p.Asn537His	1609/2100	1609/2100	537/699
LinJ.11	262526	.	A	C	.	.	ANN=C	intergenic_region	MODIFIER	LinJ.11.0670-LinJ.11.0680	LinJ.11.0670-LinJ.11.0680	intergenic_region	LinJ.11.0670-LinJ.11.0680	n.262526A>C
LinJ.11	262669	.	C	G,T	.	.	ANN=G	intergenic_region	MODIFIER	LinJ.11.0670-LinJ.11.0680	LinJ.11.0670-LinJ.11.0680	intergenic_region	LinJ.11.0670-LinJ.11.0680	n.262669C>G	,T	intergenic_region	MODIFIER	LinJ.11.0670-LinJ.11.0680	LinJ.11.0670-LinJ.11.0680	intergenic_region	LinJ.11.0670-LinJ.11.0680	n.262669C>T
LinJ.11	262853	.	C	A	.	.	ANN=A	intergenic_region	MODIFIER	LinJ.11.0670-LinJ.11.0680	LinJ.11.0670-LinJ.11.0680	intergenic_region	LinJ.11.0670-LinJ.11.0680	n.262853C>A
LinJ.11	262858	.	T	C	.	.	ANN=C	intergenic_region	MODIFIER	LinJ.11.0670-LinJ.11.0680	LinJ.11.0670-LinJ.11.0680	intergenic_region	LinJ.11.0670-LinJ.11.0680	n.262858T>C
LinJ.11	262860	.	G	A	.	.	ANN=A	intergenic_region	MODIFIER	LinJ.11.0670-LinJ.11.0680	LinJ.11.0670-LinJ.11.0680	intergenic_region	LinJ.11.0670-LinJ.11.0680	n.262860G>A
LinJ.11	263004	.	A	G	.	.	ANN=G	intergenic_region	MODIFIER	LinJ.11.0670-LinJ.11.0680	LinJ.11.0670-LinJ.11.0680	intergenic_region	LinJ.11.0670-LinJ.11.0680	n.263004A>G
LinJ.11	263027	.	G	A	.	.	ANN=A	intergenic_region	MODIFIER	LinJ.11.0670-LinJ.11.0680	LinJ.11.0670-LinJ.11.0680	intergenic_region	LinJ.11.0670-LinJ.11.0680	n.263027G>A
LinJ.11	263030	.	T	A	.	.	ANN=A	intergenic_region	MODIFIER	LinJ.11.0670-LinJ.11.0680	LinJ.11.0670-LinJ.11.0680	intergenic_region	LinJ.11.0670-LinJ.11.0680	n.263030T>A
LinJ.11	263083	.	C	A	.	.	ANN=A	intergenic_region	MODIFIER	LinJ.11.0670-LinJ.11.0680	LinJ.11.0670-LinJ.11.0680	intergenic_region	LinJ.11.0670-LinJ.11.0680	n.263083C>A
LinJ.11	263087	.	C	T	.	.	ANN=T	intergenic_region	MODIFIER	LinJ.11.0670-LinJ.11.0680	LinJ.11.0670-LinJ.11.0680	intergenic_region	LinJ.11.0670-LinJ.11.0680	n.263087C>T
LinJ.11	263131	.	G	A	.	.	ANN=A	intergenic_region	MODIFIER	LinJ.11.0670-LinJ.11.0680	LinJ.11.0670-LinJ.11.0680	intergenic_region	LinJ.11.0670-LinJ.11.0680	n.263131G>A
LinJ.11	263178	.	C	T	.	.	ANN=T	intergenic_region	MODIFIER	LinJ.11.0670-LinJ.11.0680	LinJ.11.0670-LinJ.11.0680	intergenic_region	LinJ.11.0670-LinJ.11.0680	n.263178C>T
LinJ.11	263246	.	C	G	.	.	ANN=G	missense_variant	MODERATE	LinJ.11.0680	LinJ.11.0680	transcript	LinJ.11.0680:mRNA	protein_coding	2019-01-01	c.43C>G	p.Arg15Gly	43/1869	43/1869	15/622
LinJ.11	263268	.	A	G	.	.	ANN=G	missense_variant	MODERATE	LinJ.11.0680	LinJ.11.0680	transcript	LinJ.11.0680:mRNA	protein_coding	2019-01-01	c.65A>G	p.Tyr22Cys	65/1869	65/1869	22/622
LinJ.11	263291	.	G	A	.	.	ANN=A	missense_variant	MODERATE	LinJ.11.0680	LinJ.11.0680	transcript	LinJ.11.0680:mRNA	protein_coding	2019-01-01	c.88G>A	p.Ala30Thr	88/1869	88/1869	30/622
LinJ.11	265251	.	A	C	.	.	ANN=C	intergenic_region	MODIFIER	LinJ.11.0680-LinJ.11.0690	LinJ.11.0680-LinJ.11.0690	intergenic_region	LinJ.11.0680-LinJ.11.0690	n.265251A>C
LinJ.11	272294	.	G	T	.	.	ANN=T	intergenic_region	MODIFIER	LinJ.11.0690-LinJ.11.0700	LinJ.11.0690-LinJ.11.0700	intergenic_region	LinJ.11.0690-LinJ.11.0700	n.272294G>T
LinJ.11	275438	.	G	A	.	.	ANN=A	intergenic_region	MODIFIER	LinJ.11.0700-LinJ.11.0710	LinJ.11.0700-LinJ.11.0710	intergenic_region	LinJ.11.0700-LinJ.11.0710	n.275438G>A
LinJ.11	275522	.	G	A	.	.	ANN=A	intergenic_region	MODIFIER	LinJ.11.0700-LinJ.11.0710	LinJ.11.0700-LinJ.11.0710	intergenic_region	LinJ.11.0700-LinJ.11.0710	n.275522G>A
LinJ.11	286314	.	G	A	.	.	ANN=A	intergenic_region	MODIFIER	LinJ.11.0730-LinJ.11.0740	LinJ.11.0730-LinJ.11.0740	intergenic_region	LinJ.11.0730-LinJ.11.0740	n.286314G>A
LinJ.11	287158	.	C	G	.	.	ANN=G	intergenic_region	MODIFIER	LinJ.11.0730-LinJ.11.0740	LinJ.11.0730-LinJ.11.0740	intergenic_region	LinJ.11.0730-LinJ.11.0740	n.287158C>G
LinJ.11	291096	.	A	G	.	.	ANN=G	synonymous_variant	LOW	LinJ.11.0740	LinJ.11.0740	transcript	LinJ.11.0740:mRNA	protein_coding	2019-01-01	c.2787A>G	p.Gln929Gln	2787/3804	2787/3804	929/1267
LinJ.11	540882	.	C	T	.	.	ANN=T	synonymous_variant	LOW	LinJ.11.1280	LinJ.11.1280	transcript	LinJ.11.1280:mRNA	protein_coding	2019-01-01	c.4152C>T	p.Pro1384Pro	4152/5688	4152/5688	1384/1895
LinJ.11	540966	.	T	G,C	.	.	ANN=G	synonymous_variant	LOW	LinJ.11.1280	LinJ.11.1280	transcript	LinJ.11.1280:mRNA	protein_coding	2019-01-01	c.4236T>G	p.Gly1412Gly	4236/5688	4236/5688	1412/1895	,C	synonymous_variant	LOW	LinJ.11.1280	LinJ.11.1280	transcript	LinJ.11.1280:mRNA	protein_coding	2019-01-01	c.4236T>C	p.Gly1412Gly	4236/5688	4236/5688	1412/1895
LinJ.11	543581	.	T	C	.	.	ANN=C	intergenic_region	MODIFIER	LinJ.11.1280-LinJ.11.1290	LinJ.11.1280-LinJ.11.1290	intergenic_region	LinJ.11.1280-LinJ.11.1290	n.543581T>C
LinJ.11	549037	.	A	G	.	.	ANN=G	missense_variant	MODERATE	LinJ.11.1310	LinJ.11.1310	transcript	LinJ.11.1310:mRNA	protein_coding	2019-01-01	c.590A>G	p.His197Arg	590/1335	590/1335	197/444
LinJ.11	549835	.	C	A	.	.	ANN=A	intergenic_region	MODIFIER	LinJ.11.1310-LinJ.11.1320	LinJ.11.1310-LinJ.11.1320	intergenic_region	LinJ.11.1310-LinJ.11.1320	n.549835C>A
LinJ.11	551399	.	G	C	.	.	ANN=C	missense_variant	MODERATE	LinJ.11.1320	LinJ.11.1320	transcript	LinJ.11.1320:mRNA	protein_coding	2019-01-01	c.259G>C	p.Val87Leu	259/5328	259/5328	87/1775
LinJ.11	553027	.	C	T	.	.	ANN=T	synonymous_variant	LOW	LinJ.11.1320	LinJ.11.1320	transcript	LinJ.11.1320:mRNA	protein_coding	2019-01-01	c.1887C>T	p.Thr629Thr	1887/5328	1887/5328	629/1775
LinJ.11	553687	.	T	G	.	.	ANN=G	synonymous_variant	LOW	LinJ.11.1320	LinJ.11.1320	transcript	LinJ.11.1320:mRNA	protein_coding	2019-01-01	c.2547T>G	p.Val849Val	2547/5328	2547/5328	849/1775
LinJ.11	555751	.	A	G	.	.	ANN=G	synonymous_variant	LOW	LinJ.11.1320	LinJ.11.1320	transcript	LinJ.11.1320:mRNA	protein_coding	2019-01-01	c.4611A>G	p.Leu1537Leu	4611/5328	4611/5328	1537/1775
LinJ.11	557814	.	C	T	.	.	ANN=T	synonymous_variant	LOW	LinJ.11.1330	LinJ.11.1330	transcript	LinJ.11.1330:mRNA	protein_coding	2019-01-01	c.334C>T	p.Leu112Leu	334/1884	334/1884	112/627
LinJ.11	558225	.	T	A	.	.	ANN=A	missense_variant	MODERATE	LinJ.11.1330	LinJ.11.1330	transcript	LinJ.11.1330:mRNA	protein_coding	2019-01-01	c.745T>A	p.Ser249Thr	745/1884	745/1884	249/627
LinJ.11	558554	.	T	C	.	.	ANN=C	synonymous_variant	LOW	LinJ.11.1330	LinJ.11.1330	transcript	LinJ.11.1330:mRNA	protein_coding	2019-01-01	c.1074T>C	p.Asp358Asp	1074/1884	1074/1884	358/627
LinJ.11	562478	.	C	G	.	.	ANN=G	intergenic_region	MODIFIER	LinJ.11.1340-LinJ.11.1350	LinJ.11.1340-LinJ.11.1350	intergenic_region	LinJ.11.1340-LinJ.11.1350	n.562478C>G
LinJ.11	564201	.	T	C	.	.	ANN=C	missense_variant	MODERATE	LinJ.11.1350	LinJ.11.1350	transcript	LinJ.11.1350:mRNA	protein_coding	2019-01-01	c.1282T>C	p.Cys428Arg	1282/1311	1282/1311	428/436
LinJ.11	564493	.	G	A	.	.	ANN=A	intergenic_region	MODIFIER	LinJ.11.1350-LinJ.11.1360	LinJ.11.1350-LinJ.11.1360	intergenic_region	LinJ.11.1350-LinJ.11.1360	n.564493G>A
LinJ.11	564853	.	C	G	.	.	ANN=G	intergenic_region	MODIFIER	LinJ.11.1350-LinJ.11.1360	LinJ.11.1350-LinJ.11.1360	intergenic_region	LinJ.11.1350-LinJ.11.1360	n.564853C>G
LinJ.11	565220	.	T	G	.	.	ANN=G	intergenic_region	MODIFIER	LinJ.11.1350-LinJ.11.1360	LinJ.11.1350-LinJ.11.1360	intergenic_region	LinJ.11.1350-LinJ.11.1360	n.565220T>G
LinJ.11	565396	.	G	A	.	.	ANN=A	intergenic_region	MODIFIER	LinJ.11.1350-LinJ.11.1360	LinJ.11.1350-LinJ.11.1360	intergenic_region	LinJ.11.1350-LinJ.11.1360	n.565396G>A
LinJ.11	565989	.	T	C	.	.	ANN=C	intergenic_region	MODIFIER	LinJ.11.1350-LinJ.11.1360	LinJ.11.1350-LinJ.11.1360	intergenic_region	LinJ.11.1350-LinJ.11.1360	n.565989T>C
LinJ.11	566497	.	A	G	.	.	ANN=G	missense_variant	MODERATE	LinJ.11.1360	LinJ.11.1360	transcript	LinJ.11.1360:mRNA	protein_coding	2019-01-01	c.169A>G	p.Thr57Ala	169/1857	169/1857	57/618
LinJ.11	569928	.	A	C	.	.	ANN=C	missense_variant	MODERATE	LinJ.11.1370	LinJ.11.1370	transcript	LinJ.11.1370:mRNA	protein_coding	2019-01-01	c.511A>C	p.Lys171Gln	511/1161	511/1161	171/386
LinJ.11	571070	.	G	A	.	.	ANN=A	intergenic_region	MODIFIER
LinJ.11	571222	.	G	T	.	.	ANN=T	intergenic_region	MODIFIER
LinJ.11	571248	.	T	G	.	.	ANN=G	intergenic_region	MODIFIER
LinJ.12	95181	.	A	G	.	.	ANN=G	intergenic_region	MODIFIER	LinJ.12.0230-LinJ.12.0231	LinJ.12.0230-LinJ.12.0231	intergenic_region	LinJ.12.0230-LinJ.12.0231	n.95181A>G
LinJ.12	99610	.	C	T	.	.	ANN=T	synonymous_variant	LOW	LinJ.12.0231	LinJ.12.0231	transcript	LinJ.12.0231:mRNA	protein_coding	2019-01-01	c.1932C>T	p.Leu644Leu	1932/8793	1932/8793	644/2930
LinJ.12	100344	.	T	C	.	.	ANN=C	missense_variant	MODERATE	LinJ.12.0231	LinJ.12.0231	transcript	LinJ.12.0231:mRNA	protein_coding	2019-01-01	c.2666T>C	p.Val889Ala	2666/8793	2666/8793	889/2930
LinJ.12	100427	.	G	C	.	.	ANN=C	missense_variant	MODERATE	LinJ.12.0231	LinJ.12.0231	transcript	LinJ.12.0231:mRNA	protein_coding	2019-01-01	c.2749G>C	p.Gly917Arg	2749/8793	2749/8793	917/2930
LinJ.12	100747	.	G	A	.	.	ANN=A	synonymous_variant	LOW	LinJ.12.0231	LinJ.12.0231	transcript	LinJ.12.0231:mRNA	protein_coding	2019-01-01	c.3069G>A	p.Val1023Val	3069/8793	3069/8793	1023/2930
LinJ.12	101150	.	C	A	.	.	ANN=A	synonymous_variant	LOW	LinJ.12.0231	LinJ.12.0231	transcript	LinJ.12.0231:mRNA	protein_coding	2019-01-01	c.3472C>A	p.Arg1158Arg	3472/8793	3472/8793	1158/2930
LinJ.12	101611	.	C	G	.	.	ANN=G	synonymous_variant	LOW	LinJ.12.0231	LinJ.12.0231	transcript	LinJ.12.0231:mRNA	protein_coding	2019-01-01	c.3933C>G	p.Gly1311Gly	3933/8793	3933/8793	1311/2930
LinJ.12	102122	.	G	A	.	.	ANN=A	missense_variant	MODERATE	LinJ.12.0231	LinJ.12.0231	transcript	LinJ.12.0231:mRNA	protein_coding	2019-01-01	c.4444G>A	p.Ala1482Thr	4444/8793	4444/8793	1482/2930
LinJ.12	102175	.	T	C	.	.	ANN=C	synonymous_variant	LOW	LinJ.12.0231	LinJ.12.0231	transcript	LinJ.12.0231:mRNA	protein_coding	2019-01-01	c.4497T>C	p.Arg1499Arg	4497/8793	4497/8793	1499/2930
LinJ.12	102618	.	A	G	.	.	ANN=G	missense_variant	MODERATE	LinJ.12.0231	LinJ.12.0231	transcript	LinJ.12.0231:mRNA	protein_coding	2019-01-01	c.4940A>G	p.His1647Arg	4940/8793	4940/8793	1647/2930
LinJ.12	102667	.	T	C	.	.	ANN=C	synonymous_variant	LOW	LinJ.12.0231	LinJ.12.0231	transcript	LinJ.12.0231:mRNA	protein_coding	2019-01-01	c.4989T>C	p.Ser1663Ser	4989/8793	4989/8793	1663/2930
LinJ.12	102741	.	C	T	.	.	ANN=T	missense_variant	MODERATE	LinJ.12.0231	LinJ.12.0231	transcript	LinJ.12.0231:mRNA	protein_coding	2019-01-01	c.5063C>T	p.Thr1688Ile	5063/8793	5063/8793	1688/2930
LinJ.12	124917	.	C	T	.	.	ANN=T	synonymous_variant	LOW	LinJ.12.0250	LinJ.12.0250	transcript	LinJ.12.0250:mRNA	protein_coding	2019-01-01	c.2793C>T	p.Asp931Asp	2793/5697	2793/5697	931/1898
LinJ.12	125032	.	T	C	.	.	ANN=C	synonymous_variant	LOW	LinJ.12.0250	LinJ.12.0250	transcript	LinJ.12.0250:mRNA	protein_coding	2019-01-01	c.2908T>C	p.Leu970Leu	2908/5697	2908/5697	970/1898
LinJ.12	125257	.	G	A	.	.	ANN=A	missense_variant	MODERATE	LinJ.12.0250	LinJ.12.0250	transcript	LinJ.12.0250:mRNA	protein_coding	2019-01-01	c.3133G>A	p.Asp1045Asn	3133/5697	3133/5697	1045/1898
LinJ.12	125279	.	G	A	.	.	ANN=A	missense_variant	MODERATE	LinJ.12.0250	LinJ.12.0250	transcript	LinJ.12.0250:mRNA	protein_coding	2019-01-01	c.3155G>A	p.Gly1052Asp	3155/5697	3155/5697	1052/1898
LinJ.12	125508	.	C	G	.	.	ANN=G	synonymous_variant	LOW	LinJ.12.0250	LinJ.12.0250	transcript	LinJ.12.0250:mRNA	protein_coding	2019-01-01	c.3384C>G	p.Ala1128Ala	3384/5697	3384/5697	1128/1898
LinJ.12	128583	.	G	C	.	.	ANN=C	synonymous_variant	LOW	LinJ.12.0260	LinJ.12.0260	transcript	LinJ.12.0260:mRNA	protein_coding	2019-01-01	c.378G>C	p.Pro126Pro	378/1929	378/1929	126/642
LinJ.12	128712	.	A	G	.	.	ANN=G	synonymous_variant	LOW	LinJ.12.0260	LinJ.12.0260	transcript	LinJ.12.0260:mRNA	protein_coding	2019-01-01	c.507A>G	p.Gln169Gln	507/1929	507/1929	169/642
LinJ.12	128937	.	T	C	.	.	ANN=C	synonymous_variant	LOW	LinJ.12.0260	LinJ.12.0260	transcript	LinJ.12.0260:mRNA	protein_coding	2019-01-01	c.732T>C	p.Leu244Leu	732/1929	732/1929	244/642
LinJ.12	129133	.	G	A	.	.	ANN=A	missense_variant	MODERATE	LinJ.12.0260	LinJ.12.0260	transcript	LinJ.12.0260:mRNA	protein_coding	2019-01-01	c.928G>A	p.Val310Ile	928/1929	928/1929	310/642
LinJ.12	129585	.	A	G	.	.	ANN=G	synonymous_variant	LOW	LinJ.12.0260	LinJ.12.0260	transcript	LinJ.12.0260:mRNA	protein_coding	2019-01-01	c.1380A>G	p.Val460Val	1380/1929	1380/1929	460/642
LinJ.12	132575	.	A	G	.	.	ANN=G	missense_variant	MODERATE	LinJ.12.0270	LinJ.12.0270	transcript	LinJ.12.0270:mRNA	protein_coding	2019-01-01	c.824A>G	p.Tyr275Cys	824/9693	824/9693	275/3230
LinJ.12	132957	.	T	C,A	.	.	ANN=C	synonymous_variant	LOW	LinJ.12.0270	LinJ.12.0270	transcript	LinJ.12.0270:mRNA	protein_coding	2019-01-01	c.1206T>C	p.Arg402Arg	1206/9693	1206/9693	402/3230	,A	synonymous_variant	LOW	LinJ.12.0270	LinJ.12.0270	transcript	LinJ.12.0270:mRNA	protein_coding	2019-01-01	c.1206T>A	p.Arg402Arg	1206/9693	1206/9693	402/3230
LinJ.12	139797	.	T	C	.	.	ANN=C	synonymous_variant	LOW	LinJ.12.0270	LinJ.12.0270	transcript	LinJ.12.0270:mRNA	protein_coding	2019-01-01	c.8046T>C	p.Arg2682Arg	8046/9693	8046/9693	2682/3230
LinJ.12	140073	.	A	G	.	.	ANN=G	synonymous_variant	LOW	LinJ.12.0270	LinJ.12.0270	transcript	LinJ.12.0270:mRNA	protein_coding	2019-01-01	c.8322A>G	p.Ala2774Ala	8322/9693	8322/9693	2774/3230
LinJ.12	140129	.	T	C	.	.	ANN=C	missense_variant	MODERATE	LinJ.12.0270	LinJ.12.0270	transcript	LinJ.12.0270:mRNA	protein_coding	2019-01-01	c.8378T>C	p.Val2793Ala	8378/9693	8378/9693	2793/3230
LinJ.12	140612	.	C	T	.	.	ANN=T	missense_variant	MODERATE	LinJ.12.0270	LinJ.12.0270	transcript	LinJ.12.0270:mRNA	protein_coding	2019-01-01	c.8861C>T	p.Ala2954Val	8861/9693	8861/9693	2954/3230
LinJ.12	140649	.	A	C	.	.	ANN=C	missense_variant	MODERATE	LinJ.12.0270	LinJ.12.0270	transcript	LinJ.12.0270:mRNA	protein_coding	2019-01-01	c.8898A>C	p.Glu2966Asp	8898/9693	8898/9693	2966/3230
LinJ.12	140745	.	C	T	.	.	ANN=T	synonymous_variant	LOW	LinJ.12.0270	LinJ.12.0270	transcript	LinJ.12.0270:mRNA	protein_coding	2019-01-01	c.8994C>T	p.Ser2998Ser	8994/9693	8994/9693	2998/3230
LinJ.12	141971	.	C	T	.	.	ANN=T	intergenic_region	MODIFIER	LinJ.12.0270-LinJ.12.0280	LinJ.12.0270-LinJ.12.0280	intergenic_region	LinJ.12.0270-LinJ.12.0280	n.141971C>T
LinJ.12	142953	.	T	C	.	.	ANN=C	synonymous_variant	LOW	LinJ.12.0280	LinJ.12.0280	transcript	LinJ.12.0280:mRNA	protein_coding	2019-01-01	c.66T>C	p.Gly22Gly	66/3885	66/3885	22/1294
LinJ.12	143193	.	T	C	.	.	ANN=C	synonymous_variant	LOW	LinJ.12.0280	LinJ.12.0280	transcript	LinJ.12.0280:mRNA	protein_coding	2019-01-01	c.306T>C	p.Ala102Ala	306/3885	306/3885	102/1294
LinJ.12	143584	.	T	A	.	.	ANN=A	missense_variant	MODERATE	LinJ.12.0280	LinJ.12.0280	transcript	LinJ.12.0280:mRNA	protein_coding	2019-01-01	c.697T>A	p.Ser233Thr	697/3885	697/3885	233/1294
LinJ.12	144093	.	T	C	.	.	ANN=C	synonymous_variant	LOW	LinJ.12.0280	LinJ.12.0280	transcript	LinJ.12.0280:mRNA	protein_coding	2019-01-01	c.1206T>C	p.Ser402Ser	1206/3885	1206/3885	402/1294
LinJ.12	144455	.	C	T	.	.	ANN=T	missense_variant	MODERATE	LinJ.12.0280	LinJ.12.0280	transcript	LinJ.12.0280:mRNA	protein_coding	2019-01-01	c.1568C>T	p.Ala523Val	1568/3885	1568/3885	523/1294
LinJ.12	145133	.	A	G	.	.	ANN=G	missense_variant	MODERATE	LinJ.12.0280	LinJ.12.0280	transcript	LinJ.12.0280:mRNA	protein_coding	2019-01-01	c.2246A>G	p.His749Arg	2246/3885	2246/3885	749/1294
LinJ.12	146551	.	G	A	.	.	ANN=A	missense_variant	MODERATE	LinJ.12.0280	LinJ.12.0280	transcript	LinJ.12.0280:mRNA	protein_coding	2019-01-01	c.3664G>A	p.Ala1222Thr	3664/3885	3664/3885	1222/1294
LinJ.12	146573	.	C	G	.	.	ANN=G	missense_variant	MODERATE	LinJ.12.0280	LinJ.12.0280	transcript	LinJ.12.0280:mRNA	protein_coding	2019-01-01	c.3686C>G	p.Ser1229Trp	3686/3885	3686/3885	1229/1294
LinJ.12	146760	.	T	C	.	.	ANN=C	synonymous_variant	LOW	LinJ.12.0280	LinJ.12.0280	transcript	LinJ.12.0280:mRNA	protein_coding	2019-01-01	c.3873T>C	p.Arg1291Arg	3873/3885	3873/3885	1291/1294
LinJ.12	146928	.	T	G	.	.	ANN=G	intergenic_region	MODIFIER	LinJ.12.0280-LinJ.12.0290	LinJ.12.0280-LinJ.12.0290	intergenic_region	LinJ.12.0280-LinJ.12.0290	n.146928T>G
LinJ.12	146929	.	G	T	.	.	ANN=T	intergenic_region	MODIFIER	LinJ.12.0280-LinJ.12.0290	LinJ.12.0280-LinJ.12.0290	intergenic_region	LinJ.12.0280-LinJ.12.0290	n.146929G>T
LinJ.12	147024	.	G	A	.	.	ANN=A	intergenic_region	MODIFIER	LinJ.12.0280-LinJ.12.0290	LinJ.12.0280-LinJ.12.0290	intergenic_region	LinJ.12.0280-LinJ.12.0290	n.147024G>A
LinJ.12	147181	.	G	A	.	.	ANN=A	intergenic_region	MODIFIER	LinJ.12.0280-LinJ.12.0290	LinJ.12.0280-LinJ.12.0290	intergenic_region	LinJ.12.0280-LinJ.12.0290	n.147181G>A
LinJ.12	147259	.	G	A	.	.	ANN=A	intergenic_region	MODIFIER	LinJ.12.0280-LinJ.12.0290	LinJ.12.0280-LinJ.12.0290	intergenic_region	LinJ.12.0280-LinJ.12.0290	n.147259G>A
LinJ.12	148212	.	C	T	.	.	ANN=T	intergenic_region	MODIFIER	LinJ.12.0280-LinJ.12.0290	LinJ.12.0280-LinJ.12.0290	intergenic_region	LinJ.12.0280-LinJ.12.0290	n.148212C>T
LinJ.12	148652	.	A	C	.	.	ANN=C	synonymous_variant	LOW	LinJ.12.0290	LinJ.12.0290	transcript	LinJ.12.0290:mRNA	protein_coding	2019-01-01	c.439A>C	p.Arg147Arg	439/6024	439/6024	147/2007
LinJ.12	148901	.	G	A	.	.	ANN=A	missense_variant	MODERATE	LinJ.12.0290	LinJ.12.0290	transcript	LinJ.12.0290:mRNA	protein_coding	2019-01-01	c.688G>A	p.Ala230Thr	688/6024	688/6024	230/2007
LinJ.12	150320	.	G	T	.	.	ANN=T	missense_variant	MODERATE	LinJ.12.0290	LinJ.12.0290	transcript	LinJ.12.0290:mRNA	protein_coding	2019-01-01	c.2107G>T	p.Ala703Ser	2107/6024	2107/6024	703/2007
LinJ.12	150780	.	A	G	.	.	ANN=G	missense_variant	MODERATE	LinJ.12.0290	LinJ.12.0290	transcript	LinJ.12.0290:mRNA	protein_coding	2019-01-01	c.2567A>G	p.Glu856Gly	2567/6024	2567/6024	856/2007
LinJ.12	150851	.	T	C	.	.	ANN=C	missense_variant	MODERATE	LinJ.12.0290	LinJ.12.0290	transcript	LinJ.12.0290:mRNA	protein_coding	2019-01-01	c.2638T>C	p.Ser880Pro	2638/6024	2638/6024	880/2007
LinJ.12	151658	.	C	G	.	.	ANN=G	missense_variant	MODERATE	LinJ.12.0290	LinJ.12.0290	transcript	LinJ.12.0290:mRNA	protein_coding	2019-01-01	c.3445C>G	p.Leu1149Val	3445/6024	3445/6024	1149/2007
LinJ.12	151996	.	C	T,G	.	.	ANN=T	synonymous_variant	LOW	LinJ.12.0290	LinJ.12.0290	transcript	LinJ.12.0290:mRNA	protein_coding	2019-01-01	c.3783C>T	p.Gly1261Gly	3783/6024	3783/6024	1261/2007	,G	synonymous_variant	LOW	LinJ.12.0290	LinJ.12.0290	transcript	LinJ.12.0290:mRNA	protein_coding	2019-01-01	c.3783C>G	p.Gly1261Gly	3783/6024	3783/6024	1261/2007
LinJ.12	153476	.	A	G	.	.	ANN=G	missense_variant	MODERATE	LinJ.12.0290	LinJ.12.0290	transcript	LinJ.12.0290:mRNA	protein_coding	2019-01-01	c.5263A>G	p.Thr1755Ala	5263/6024	5263/6024	1755/2007
LinJ.12	153605	.	A	G	.	.	ANN=G	missense_variant	MODERATE	LinJ.12.0290	LinJ.12.0290	transcript	LinJ.12.0290:mRNA	protein_coding	2019-01-01	c.5392A>G	p.Thr1798Ala	5392/6024	5392/6024	1798/2007
LinJ.12	154565	.	C	T	.	.	ANN=T	intergenic_region	MODIFIER	LinJ.12.0290-LinJ.12.0300	LinJ.12.0290-LinJ.12.0300	intergenic_region	LinJ.12.0290-LinJ.12.0300	n.154565C>T
LinJ.12	154929	.	C	T	.	.	ANN=T	intergenic_region	MODIFIER	LinJ.12.0290-LinJ.12.0300	LinJ.12.0290-LinJ.12.0300	intergenic_region	LinJ.12.0290-LinJ.12.0300	n.154929C>T
LinJ.12	155118	.	T	C	.	.	ANN=C	intergenic_region	MODIFIER	LinJ.12.0290-LinJ.12.0300	LinJ.12.0290-LinJ.12.0300	intergenic_region	LinJ.12.0290-LinJ.12.0300	n.155118T>C
LinJ.12	155129	.	C	T	.	.	ANN=T	intergenic_region	MODIFIER	LinJ.12.0290-LinJ.12.0300	LinJ.12.0290-LinJ.12.0300	intergenic_region	LinJ.12.0290-LinJ.12.0300	n.155129C>T
LinJ.12	155138	.	C	T	.	.	ANN=T	intergenic_region	MODIFIER	LinJ.12.0290-LinJ.12.0300	LinJ.12.0290-LinJ.12.0300	intergenic_region	LinJ.12.0290-LinJ.12.0300	n.155138C>T
LinJ.12	159451	.	A	G	.	.	ANN=G	intergenic_region	MODIFIER	LinJ.12.0300-LinJ.12.0310	LinJ.12.0300-LinJ.12.0310	intergenic_region	LinJ.12.0300-LinJ.12.0310	n.159451A>G
LinJ.12	163387	.	A	G	.	.	ANN=G	intergenic_region	MODIFIER	LinJ.12.0310-LinJ.12.0320	LinJ.12.0310-LinJ.12.0320	intergenic_region	LinJ.12.0310-LinJ.12.0320	n.163387A>G
LinJ.12	163601	.	G	A	.	.	ANN=A	intergenic_region	MODIFIER	LinJ.12.0310-LinJ.12.0320	LinJ.12.0310-LinJ.12.0320	intergenic_region	LinJ.12.0310-LinJ.12.0320	n.163601G>A
LinJ.12	167548	.	A	C	.	.	ANN=C	intergenic_region	MODIFIER	LinJ.12.0320-LinJ.12.0330	LinJ.12.0320-LinJ.12.0330	intergenic_region	LinJ.12.0320-LinJ.12.0330	n.167548A>C
LinJ.12	168809	.	T	C	.	.	ANN=C	intergenic_region	MODIFIER	LinJ.12.0320-LinJ.12.0330	LinJ.12.0320-LinJ.12.0330	intergenic_region	LinJ.12.0320-LinJ.12.0330	n.168809T>C
LinJ.12	168813	.	G	C	.	.	ANN=C	intergenic_region	MODIFIER	LinJ.12.0320-LinJ.12.0330	LinJ.12.0320-LinJ.12.0330	intergenic_region	LinJ.12.0320-LinJ.12.0330	n.168813G>C
LinJ.12	169819	.	G	A	.	.	ANN=A	intergenic_region	MODIFIER	LinJ.12.0320-LinJ.12.0330	LinJ.12.0320-LinJ.12.0330	intergenic_region	LinJ.12.0320-LinJ.12.0330	n.169819G>A
LinJ.12	170463	.	C	T	.	.	ANN=T	intergenic_region	MODIFIER	LinJ.12.0320-LinJ.12.0330	LinJ.12.0320-LinJ.12.0330	intergenic_region	LinJ.12.0320-LinJ.12.0330	n.170463C>T
LinJ.12	173413	.	G	C	.	.	ANN=C	synonymous_variant	LOW	LinJ.12.0330	LinJ.12.0330	transcript	LinJ.12.0330:mRNA	protein_coding	2019-01-01	c.2664G>C	p.Gly888Gly	2664/4440	2664/4440	888/1479
LinJ.12	180301	.	C	T	.	.	ANN=T	intergenic_region	MODIFIER	LinJ.12.0350-LinJ.12.0360	LinJ.12.0350-LinJ.12.0360	intergenic_region	LinJ.12.0350-LinJ.12.0360	n.180301C>T
LinJ.12	180304	.	A	G	.	.	ANN=G	intergenic_region	MODIFIER	LinJ.12.0350-LinJ.12.0360	LinJ.12.0350-LinJ.12.0360	intergenic_region	LinJ.12.0350-LinJ.12.0360	n.180304A>G
LinJ.12	180307	.	T	C	.	.	ANN=C	intergenic_region	MODIFIER	LinJ.12.0350-LinJ.12.0360	LinJ.12.0350-LinJ.12.0360	intergenic_region	LinJ.12.0350-LinJ.12.0360	n.180307T>C
LinJ.12	180309	.	T	C	.	.	ANN=C	intergenic_region	MODIFIER	LinJ.12.0350-LinJ.12.0360	LinJ.12.0350-LinJ.12.0360	intergenic_region	LinJ.12.0350-LinJ.12.0360	n.180309T>C
LinJ.12	181160	.	C	T	.	.	ANN=T	intergenic_region	MODIFIER	LinJ.12.0350-LinJ.12.0360	LinJ.12.0350-LinJ.12.0360	intergenic_region	LinJ.12.0350-LinJ.12.0360	n.181160C>T
LinJ.12	181469	.	A	G	.	.	ANN=G	intergenic_region	MODIFIER	LinJ.12.0350-LinJ.12.0360	LinJ.12.0350-LinJ.12.0360	intergenic_region	LinJ.12.0350-LinJ.12.0360	n.181469A>G
LinJ.12	181822	.	T	C	.	.	ANN=C	intergenic_region	MODIFIER	LinJ.12.0350-LinJ.12.0360	LinJ.12.0350-LinJ.12.0360	intergenic_region	LinJ.12.0350-LinJ.12.0360	n.181822T>C
LinJ.12	181837	.	G	A	.	.	ANN=A	intergenic_region	MODIFIER	LinJ.12.0350-LinJ.12.0360	LinJ.12.0350-LinJ.12.0360	intergenic_region	LinJ.12.0350-LinJ.12.0360	n.181837G>A
LinJ.12	182813	.	A	G	.	.	ANN=G	synonymous_variant	LOW	LinJ.12.0360	LinJ.12.0360	transcript	LinJ.12.0360:mRNA	protein_coding	2019-01-01	c.939T>C	p.Ala313Ala	939/1233	939/1233	313/410
LinJ.12	183057	.	A	G	.	.	ANN=G	missense_variant	MODERATE	LinJ.12.0360	LinJ.12.0360	transcript	LinJ.12.0360:mRNA	protein_coding	2019-01-01	c.695T>C	p.Val232Ala	695/1233	695/1233	232/410
LinJ.12	183224	.	A	G	.	.	ANN=G	synonymous_variant	LOW	LinJ.12.0360	LinJ.12.0360	transcript	LinJ.12.0360:mRNA	protein_coding	2019-01-01	c.528T>C	p.Leu176Leu	528/1233	528/1233	176/410
LinJ.12	183653	.	T	G	.	.	ANN=G	missense_variant	MODERATE	LinJ.12.0360	LinJ.12.0360	transcript	LinJ.12.0360:mRNA	protein_coding	2019-01-01	c.99A>C	p.Glu33Asp	99/1233	99/1233	33/410
LinJ.12	183855	.	A	G	.	.	ANN=G	intergenic_region	MODIFIER	LinJ.12.0360-LinJ.12.0370	LinJ.12.0360-LinJ.12.0370	intergenic_region	LinJ.12.0360-LinJ.12.0370	n.183855A>G
LinJ.12	183916	.	A	C	.	.	ANN=C	intergenic_region	MODIFIER	LinJ.12.0360-LinJ.12.0370	LinJ.12.0360-LinJ.12.0370	intergenic_region	LinJ.12.0360-LinJ.12.0370	n.183916A>C
LinJ.12	185150	.	A	G	.	.	ANN=G	intergenic_region	MODIFIER	LinJ.12.0360-LinJ.12.0370	LinJ.12.0360-LinJ.12.0370	intergenic_region	LinJ.12.0360-LinJ.12.0370	n.185150A>G
LinJ.12	187477	.	G	A	.	.	ANN=A	intergenic_region	MODIFIER	LinJ.12.0370-LinJ.12.0380	LinJ.12.0370-LinJ.12.0380	intergenic_region	LinJ.12.0370-LinJ.12.0380	n.187477G>A
LinJ.12	188424	.	T	C	.	.	ANN=C	intergenic_region	MODIFIER	LinJ.12.0380-LinJ.12.0390	LinJ.12.0380-LinJ.12.0390	intergenic_region	LinJ.12.0380-LinJ.12.0390	n.188424T>C
LinJ.12	192721	.	A	C	.	.	ANN=C	missense_variant	MODERATE	LinJ.12.0400	LinJ.12.0400	transcript	LinJ.12.0400:mRNA	protein_coding	2019-01-01	c.1087T>G	p.Cys363Gly	1087/1956	1087/1956	363/651
LinJ.12	195130	.	A	G	.	.	ANN=G	intergenic_region	MODIFIER	LinJ.12.0400-LinJ.12.0410	LinJ.12.0400-LinJ.12.0410	intergenic_region	LinJ.12.0400-LinJ.12.0410	n.195130A>G
LinJ.12	195240	.	C	T	.	.	ANN=T	intergenic_region	MODIFIER	LinJ.12.0400-LinJ.12.0410	LinJ.12.0400-LinJ.12.0410	intergenic_region	LinJ.12.0400-LinJ.12.0410	n.195240C>T
LinJ.12	196474	.	T	C	.	.	ANN=C	missense_variant	MODERATE	LinJ.12.0410	LinJ.12.0410	transcript	LinJ.12.0410:mRNA	protein_coding	2019-01-01	c.2113A>G	p.Arg705Gly	2113/3270	2113/3270	705/1089
LinJ.12	198086	.	G	A	.	.	ANN=A	synonymous_variant	LOW	LinJ.12.0410	LinJ.12.0410	transcript	LinJ.12.0410:mRNA	protein_coding	2019-01-01	c.501C>T	p.Asp167Asp	501/3270	501/3270	167/1089
LinJ.12	201002	.	A	G	.	.	ANN=G	intergenic_region	MODIFIER	LinJ.12.0410-LinJ.12.0420	LinJ.12.0410-LinJ.12.0420	intergenic_region	LinJ.12.0410-LinJ.12.0420	n.201002A>G
LinJ.12	206509	.	T	G	.	.	ANN=G	synonymous_variant	LOW	LinJ.12.0420	LinJ.12.0420	transcript	LinJ.12.0420:mRNA	protein_coding	2019-01-01	c.1314A>C	p.Ala438Ala	1314/2355	1314/2355	438/784
LinJ.12	209606	.	A	G	.	.	ANN=G	intergenic_region	MODIFIER	LinJ.12.0420-LinJ.12.0430	LinJ.12.0420-LinJ.12.0430	intergenic_region	LinJ.12.0420-LinJ.12.0430	n.209606A>G
LinJ.12	210690	.	G	C	.	.	ANN=C	intergenic_region	MODIFIER	LinJ.12.0420-LinJ.12.0430	LinJ.12.0420-LinJ.12.0430	intergenic_region	LinJ.12.0420-LinJ.12.0430	n.210690G>C
LinJ.12	210853	.	A	T	.	.	ANN=T	intergenic_region	MODIFIER	LinJ.12.0420-LinJ.12.0430	LinJ.12.0420-LinJ.12.0430	intergenic_region	LinJ.12.0420-LinJ.12.0430	n.210853A>T
LinJ.12	211019	.	A	G	.	.	ANN=G	intergenic_region	MODIFIER	LinJ.12.0420-LinJ.12.0430	LinJ.12.0420-LinJ.12.0430	intergenic_region	LinJ.12.0420-LinJ.12.0430	n.211019A>G
LinJ.12	211815	.	C	A	.	.	ANN=A	intergenic_region	MODIFIER	LinJ.12.0420-LinJ.12.0430	LinJ.12.0420-LinJ.12.0430	intergenic_region	LinJ.12.0420-LinJ.12.0430	n.211815C>A
LinJ.12	213434	.	A	G	.	.	ANN=G	intergenic_region	MODIFIER	LinJ.12.0420-LinJ.12.0430	LinJ.12.0420-LinJ.12.0430	intergenic_region	LinJ.12.0420-LinJ.12.0430	n.213434A>G
LinJ.12	213453	.	A	G	.	.	ANN=G	intergenic_region	MODIFIER	LinJ.12.0420-LinJ.12.0430	LinJ.12.0420-LinJ.12.0430	intergenic_region	LinJ.12.0420-LinJ.12.0430	n.213453A>G
LinJ.12	214516	.	G	A	.	.	ANN=A	intergenic_region	MODIFIER	LinJ.12.0420-LinJ.12.0430	LinJ.12.0420-LinJ.12.0430	intergenic_region	LinJ.12.0420-LinJ.12.0430	n.214516G>A
LinJ.12	215265	.	C	T	.	.	ANN=T	intergenic_region	MODIFIER	LinJ.12.0420-LinJ.12.0430	LinJ.12.0420-LinJ.12.0430	intergenic_region	LinJ.12.0420-LinJ.12.0430	n.215265C>T
LinJ.12	216713	.	A	T	.	.	ANN=T	intergenic_region	MODIFIER	LinJ.12.0420-LinJ.12.0430	LinJ.12.0420-LinJ.12.0430	intergenic_region	LinJ.12.0420-LinJ.12.0430	n.216713A>T
LinJ.12	217142	.	A	C	.	.	ANN=C	intergenic_region	MODIFIER	LinJ.12.0420-LinJ.12.0430	LinJ.12.0420-LinJ.12.0430	intergenic_region	LinJ.12.0420-LinJ.12.0430	n.217142A>C
LinJ.12	217219	.	C	T	.	.	ANN=T	intergenic_region	MODIFIER	LinJ.12.0420-LinJ.12.0430	LinJ.12.0420-LinJ.12.0430	intergenic_region	LinJ.12.0420-LinJ.12.0430	n.217219C>T
LinJ.12	217451	.	T	G,A	.	.	ANN=G	intergenic_region	MODIFIER	LinJ.12.0420-LinJ.12.0430	LinJ.12.0420-LinJ.12.0430	intergenic_region	LinJ.12.0420-LinJ.12.0430	n.217451T>G	,A	intergenic_region	MODIFIER	LinJ.12.0420-LinJ.12.0430	LinJ.12.0420-LinJ.12.0430	intergenic_region	LinJ.12.0420-LinJ.12.0430	n.217451T>A
LinJ.12	219504	.	C	T	.	.	ANN=T	intergenic_region	MODIFIER	LinJ.12.0420-LinJ.12.0430	LinJ.12.0420-LinJ.12.0430	intergenic_region	LinJ.12.0420-LinJ.12.0430	n.219504C>T
LinJ.12	223472	.	C	T	.	.	ANN=T	intergenic_region	MODIFIER	LinJ.12.0430-LinJ.12.0440	LinJ.12.0430-LinJ.12.0440	intergenic_region	LinJ.12.0430-LinJ.12.0440	n.223472C>T
LinJ.12	223496	.	C	T	.	.	ANN=T	intergenic_region	MODIFIER	LinJ.12.0430-LinJ.12.0440	LinJ.12.0430-LinJ.12.0440	intergenic_region	LinJ.12.0430-LinJ.12.0440	n.223496C>T
LinJ.12	223606	.	C	T	.	.	ANN=T	intergenic_region	MODIFIER	LinJ.12.0430-LinJ.12.0440	LinJ.12.0430-LinJ.12.0440	intergenic_region	LinJ.12.0430-LinJ.12.0440	n.223606C>T
LinJ.12	223720	.	G	A	.	.	ANN=A	intergenic_region	MODIFIER	LinJ.12.0430-LinJ.12.0440	LinJ.12.0430-LinJ.12.0440	intergenic_region	LinJ.12.0430-LinJ.12.0440	n.223720G>A
LinJ.12	223887	.	G	C	.	.	ANN=C	intergenic_region	MODIFIER	LinJ.12.0430-LinJ.12.0440	LinJ.12.0430-LinJ.12.0440	intergenic_region	LinJ.12.0430-LinJ.12.0440	n.223887G>C
LinJ.12	223983	.	G	A	.	.	ANN=A	intergenic_region	MODIFIER	LinJ.12.0430-LinJ.12.0440	LinJ.12.0430-LinJ.12.0440	intergenic_region	LinJ.12.0430-LinJ.12.0440	n.223983G>A
LinJ.12	225196	.	G	A	.	.	ANN=A	intergenic_region	MODIFIER	LinJ.12.0430-LinJ.12.0440	LinJ.12.0430-LinJ.12.0440	intergenic_region	LinJ.12.0430-LinJ.12.0440	n.225196G>A
LinJ.12	225257	.	G	A	.	.	ANN=A	intergenic_region	MODIFIER	LinJ.12.0430-LinJ.12.0440	LinJ.12.0430-LinJ.12.0440	intergenic_region	LinJ.12.0430-LinJ.12.0440	n.225257G>A
LinJ.12	225528	.	C	T	.	.	ANN=T	intergenic_region	MODIFIER	LinJ.12.0430-LinJ.12.0440	LinJ.12.0430-LinJ.12.0440	intergenic_region	LinJ.12.0430-LinJ.12.0440	n.225528C>T
LinJ.12	228472	.	T	C	.	.	ANN=C	intergenic_region	MODIFIER	LinJ.12.0430-LinJ.12.0440	LinJ.12.0430-LinJ.12.0440	intergenic_region	LinJ.12.0430-LinJ.12.0440	n.228472T>C
LinJ.12	231171	.	A	G	.	.	ANN=G	missense_variant	MODERATE	LinJ.12.0440	LinJ.12.0440	transcript	LinJ.12.0440:mRNA	protein_coding	2019-01-01	c.1304T>C	p.Leu435Pro	1304/1830	1304/1830	435/609
LinJ.12	233097	.	G	A	.	.	ANN=A	intergenic_region	MODIFIER	LinJ.12.0440-LinJ.12.0450	LinJ.12.0440-LinJ.12.0450	intergenic_region	LinJ.12.0440-LinJ.12.0450	n.233097G>A
LinJ.12	234038	.	C	T	.	.	ANN=T	intergenic_region	MODIFIER	LinJ.12.0440-LinJ.12.0450	LinJ.12.0440-LinJ.12.0450	intergenic_region	LinJ.12.0440-LinJ.12.0450	n.234038C>T
LinJ.12	235514	.	T	G	.	.	ANN=G	intergenic_region	MODIFIER	LinJ.12.0440-LinJ.12.0450	LinJ.12.0440-LinJ.12.0450	intergenic_region	LinJ.12.0440-LinJ.12.0450	n.235514T>G
LinJ.12	240202	.	C	T	.	.	ANN=T	intergenic_region	MODIFIER	LinJ.12.0440-LinJ.12.0450	LinJ.12.0440-LinJ.12.0450	intergenic_region	LinJ.12.0440-LinJ.12.0450	n.240202C>T
LinJ.12	242517	.	G	A	.	.	ANN=A	intergenic_region	MODIFIER	LinJ.12.0440-LinJ.12.0450	LinJ.12.0440-LinJ.12.0450	intergenic_region	LinJ.12.0440-LinJ.12.0450	n.242517G>A
LinJ.12	245313	.	A	G	.	.	ANN=G	intergenic_region	MODIFIER	LinJ.12.0440-LinJ.12.0450	LinJ.12.0440-LinJ.12.0450	intergenic_region	LinJ.12.0440-LinJ.12.0450	n.245313A>G
LinJ.12	248002	.	C	T	.	.	ANN=T	intergenic_region	MODIFIER	LinJ.12.0440-LinJ.12.0450	LinJ.12.0440-LinJ.12.0450	intergenic_region	LinJ.12.0440-LinJ.12.0450	n.248002C>T
LinJ.12	257092	.	T	C	.	.	ANN=C	intergenic_region	MODIFIER	LinJ.12.0440-LinJ.12.0450	LinJ.12.0440-LinJ.12.0450	intergenic_region	LinJ.12.0440-LinJ.12.0450	n.257092T>C
LinJ.12	258673	.	T	G	.	.	ANN=G	missense_variant	MODERATE	LinJ.12.0450	LinJ.12.0450	transcript	LinJ.12.0450:mRNA	protein_coding	2019-01-01	c.38A>C	p.Gln13Pro	38/954	38/954	13/317
LinJ.12	258733	.	C	A	.	.	ANN=A	intergenic_region	MODIFIER	LinJ.12.0450-LinJ.12.0460	LinJ.12.0450-LinJ.12.0460	intergenic_region	LinJ.12.0450-LinJ.12.0460	n.258733C>A
LinJ.12	259951	.	A	C	.	.	ANN=C	intergenic_region	MODIFIER	LinJ.12.0450-LinJ.12.0460	LinJ.12.0450-LinJ.12.0460	intergenic_region	LinJ.12.0450-LinJ.12.0460	n.259951A>C
LinJ.12	267322	.	T	C	.	.	ANN=C	missense_variant	MODERATE	LinJ.12.0460	LinJ.12.0460	transcript	LinJ.12.0460:mRNA	protein_coding	2019-01-01	c.1195A>G	p.Ser399Gly	1195/4422	1195/4422	399/1473
LinJ.12	275868	.	G	A	.	.	ANN=A	intergenic_region	MODIFIER	LinJ.12.0460-LinJ.12.0470	LinJ.12.0460-LinJ.12.0470	intergenic_region	LinJ.12.0460-LinJ.12.0470	n.275868G>A
LinJ.12	275905	.	T	C	.	.	ANN=C	intergenic_region	MODIFIER	LinJ.12.0460-LinJ.12.0470	LinJ.12.0460-LinJ.12.0470	intergenic_region	LinJ.12.0460-LinJ.12.0470	n.275905T>C
LinJ.12	276136	.	A	G	.	.	ANN=G	intergenic_region	MODIFIER	LinJ.12.0460-LinJ.12.0470	LinJ.12.0460-LinJ.12.0470	intergenic_region	LinJ.12.0460-LinJ.12.0470	n.276136A>G
LinJ.12	276256	.	A	G	.	.	ANN=G	intergenic_region	MODIFIER	LinJ.12.0460-LinJ.12.0470	LinJ.12.0460-LinJ.12.0470	intergenic_region	LinJ.12.0460-LinJ.12.0470	n.276256A>G
LinJ.12	276484	.	G	A	.	.	ANN=A	intergenic_region	MODIFIER	LinJ.12.0460-LinJ.12.0470	LinJ.12.0460-LinJ.12.0470	intergenic_region	LinJ.12.0460-LinJ.12.0470	n.276484G>A
LinJ.12	276495	.	A	G	.	.	ANN=G	intergenic_region	MODIFIER	LinJ.12.0460-LinJ.12.0470	LinJ.12.0460-LinJ.12.0470	intergenic_region	LinJ.12.0460-LinJ.12.0470	n.276495A>G
LinJ.12	276537	.	C	T	.	.	ANN=T	intergenic_region	MODIFIER	LinJ.12.0460-LinJ.12.0470	LinJ.12.0460-LinJ.12.0470	intergenic_region	LinJ.12.0460-LinJ.12.0470	n.276537C>T
LinJ.12	276835	.	T	C	.	.	ANN=C	intergenic_region	MODIFIER	LinJ.12.0460-LinJ.12.0470	LinJ.12.0460-LinJ.12.0470	intergenic_region	LinJ.12.0460-LinJ.12.0470	n.276835T>C
LinJ.12	277053	.	A	G	.	.	ANN=G	intergenic_region	MODIFIER	LinJ.12.0460-LinJ.12.0470	LinJ.12.0460-LinJ.12.0470	intergenic_region	LinJ.12.0460-LinJ.12.0470	n.277053A>G
LinJ.12	347410	.	C	T	.	.	ANN=T	intergenic_region	MODIFIER	LinJ.12.0570-LinJ.12.0580	LinJ.12.0570-LinJ.12.0580	intergenic_region	LinJ.12.0570-LinJ.12.0580	n.347410C>T
LinJ.12	350108	.	T	C	.	.	ANN=C	intergenic_region	MODIFIER	LinJ.12.0580-LinJ.12.0590	LinJ.12.0580-LinJ.12.0590	intergenic_region	LinJ.12.0580-LinJ.12.0590	n.350108T>C
LinJ.12	350851	.	T	A,C	.	.	ANN=A	intergenic_region	MODIFIER	LinJ.12.0580-LinJ.12.0590	LinJ.12.0580-LinJ.12.0590	intergenic_region	LinJ.12.0580-LinJ.12.0590	n.350851T>A	,C	intergenic_region	MODIFIER	LinJ.12.0580-LinJ.12.0590	LinJ.12.0580-LinJ.12.0590	intergenic_region	LinJ.12.0580-LinJ.12.0590	n.350851T>C
LinJ.12	354878	.	G	T	.	.	ANN=T	intergenic_region	MODIFIER	LinJ.12.0590-LinJ.12.0600	LinJ.12.0590-LinJ.12.0600	intergenic_region	LinJ.12.0590-LinJ.12.0600	n.354878G>T
LinJ.12	354959	.	T	A	.	.	ANN=A	intergenic_region	MODIFIER	LinJ.12.0590-LinJ.12.0600	LinJ.12.0590-LinJ.12.0600	intergenic_region	LinJ.12.0590-LinJ.12.0600	n.354959T>A
LinJ.12	355050	.	G	C	.	.	ANN=C	intergenic_region	MODIFIER	LinJ.12.0590-LinJ.12.0600	LinJ.12.0590-LinJ.12.0600	intergenic_region	LinJ.12.0590-LinJ.12.0600	n.355050G>C
LinJ.12	355162	.	A	T	.	.	ANN=T	intergenic_region	MODIFIER	LinJ.12.0590-LinJ.12.0600	LinJ.12.0590-LinJ.12.0600	intergenic_region	LinJ.12.0590-LinJ.12.0600	n.355162A>T
LinJ.12	355222	.	C	T	.	.	ANN=T	intergenic_region	MODIFIER	LinJ.12.0590-LinJ.12.0600	LinJ.12.0590-LinJ.12.0600	intergenic_region	LinJ.12.0590-LinJ.12.0600	n.355222C>T
LinJ.12	355246	.	T	C	.	.	ANN=C	intergenic_region	MODIFIER	LinJ.12.0590-LinJ.12.0600	LinJ.12.0590-LinJ.12.0600	intergenic_region	LinJ.12.0590-LinJ.12.0600	n.355246T>C
LinJ.12	355271	.	T	C	.	.	ANN=C	intergenic_region	MODIFIER	LinJ.12.0590-LinJ.12.0600	LinJ.12.0590-LinJ.12.0600	intergenic_region	LinJ.12.0590-LinJ.12.0600	n.355271T>C
LinJ.12	355659	.	T	C	.	.	ANN=C	intergenic_region	MODIFIER	LinJ.12.0590-LinJ.12.0600	LinJ.12.0590-LinJ.12.0600	intergenic_region	LinJ.12.0590-LinJ.12.0600	n.355659T>C
LinJ.12	355702	.	T	C	.	.	ANN=C	intergenic_region	MODIFIER	LinJ.12.0590-LinJ.12.0600	LinJ.12.0590-LinJ.12.0600	intergenic_region	LinJ.12.0590-LinJ.12.0600	n.355702T>C
LinJ.12	355820	.	G	C	.	.	ANN=C	intergenic_region	MODIFIER	LinJ.12.0590-LinJ.12.0600	LinJ.12.0590-LinJ.12.0600	intergenic_region	LinJ.12.0590-LinJ.12.0600	n.355820G>C
LinJ.12	355910	.	A	G	.	.	ANN=G	intergenic_region	MODIFIER	LinJ.12.0590-LinJ.12.0600	LinJ.12.0590-LinJ.12.0600	intergenic_region	LinJ.12.0590-LinJ.12.0600	n.355910A>G
LinJ.12	357881	.	A	G	.	.	ANN=G	missense_variant	MODERATE	LinJ.12.0600	LinJ.12.0600	transcript	LinJ.12.0600:mRNA	protein_coding	2019-01-01	c.899A>G	p.His300Arg	899/1854	899/1854	300/617
LinJ.12	370804	.	A	G	.	.	ANN=G	intergenic_region	MODIFIER	LinJ.12.0620-LinJ.12.0630	LinJ.12.0620-LinJ.12.0630	intergenic_region	LinJ.12.0620-LinJ.12.0630	n.370804A>G
LinJ.12	370937	.	A	G	.	.	ANN=G	intergenic_region	MODIFIER	LinJ.12.0620-LinJ.12.0630	LinJ.12.0620-LinJ.12.0630	intergenic_region	LinJ.12.0620-LinJ.12.0630	n.370937A>G
LinJ.12	371137	.	C	G	.	.	ANN=G	intergenic_region	MODIFIER	LinJ.12.0620-LinJ.12.0630	LinJ.12.0620-LinJ.12.0630	intergenic_region	LinJ.12.0620-LinJ.12.0630	n.371137C>G
LinJ.12	381124	.	A	G	.	.	ANN=G	intergenic_region	MODIFIER	LinJ.12.0680-LinJ.12.0661	LinJ.12.0680-LinJ.12.0661	intergenic_region	LinJ.12.0680-LinJ.12.0661	n.381124A>G
LinJ.12	444803	.	G	C	.	.	ANN=C	intergenic_region	MODIFIER	LinJ.12.0690-LinJ.12.0700	LinJ.12.0690-LinJ.12.0700	intergenic_region	LinJ.12.0690-LinJ.12.0700	n.444803G>C
LinJ.12	444901	.	A	C	.	.	ANN=C	intergenic_region	MODIFIER	LinJ.12.0690-LinJ.12.0700	LinJ.12.0690-LinJ.12.0700	intergenic_region	LinJ.12.0690-LinJ.12.0700	n.444901A>C
LinJ.12	444928	.	A	G	.	.	ANN=G	intergenic_region	MODIFIER	LinJ.12.0690-LinJ.12.0700	LinJ.12.0690-LinJ.12.0700	intergenic_region	LinJ.12.0690-LinJ.12.0700	n.444928A>G
LinJ.12	445106	.	A	G	.	.	ANN=G	intergenic_region	MODIFIER	LinJ.12.0690-LinJ.12.0700	LinJ.12.0690-LinJ.12.0700	intergenic_region	LinJ.12.0690-LinJ.12.0700	n.445106A>G
LinJ.12	445414	.	A	C	.	.	ANN=C	intergenic_region	MODIFIER	LinJ.12.0690-LinJ.12.0700	LinJ.12.0690-LinJ.12.0700	intergenic_region	LinJ.12.0690-LinJ.12.0700	n.445414A>C
LinJ.12	457082	.	T	C	.	.	ANN=C	synonymous_variant	LOW	LinJ.12.0720	LinJ.12.0720	transcript	LinJ.12.0720:mRNA	protein_coding	2019-01-01	c.1134T>C	p.Arg378Arg	1134/3864	1134/3864	378/1287
LinJ.12	457956	.	T	C	.	.	ANN=C	synonymous_variant	LOW	LinJ.12.0720	LinJ.12.0720	transcript	LinJ.12.0720:mRNA	protein_coding	2019-01-01	c.2008T>C	p.Leu670Leu	2008/3864	2008/3864	670/1287
LinJ.12	458274	.	G	A	.	.	ANN=A	missense_variant	MODERATE	LinJ.12.0720	LinJ.12.0720	transcript	LinJ.12.0720:mRNA	protein_coding	2019-01-01	c.2326G>A	p.Gly776Ser	2326/3864	2326/3864	776/1287
LinJ.12	458275	.	G	T	.	.	ANN=T	missense_variant	MODERATE	LinJ.12.0720	LinJ.12.0720	transcript	LinJ.12.0720:mRNA	protein_coding	2019-01-01	c.2327G>T	p.Gly776Val	2327/3864	2327/3864	776/1287
LinJ.12	458453	.	T	C	.	.	ANN=C	synonymous_variant	LOW	LinJ.12.0720	LinJ.12.0720	transcript	LinJ.12.0720:mRNA	protein_coding	2019-01-01	c.2505T>C	p.Leu835Leu	2505/3864	2505/3864	835/1287
LinJ.12	458585	.	T	G	.	.	ANN=G	synonymous_variant	LOW	LinJ.12.0720	LinJ.12.0720	transcript	LinJ.12.0720:mRNA	protein_coding	2019-01-01	c.2637T>G	p.Ala879Ala	2637/3864	2637/3864	879/1287
LinJ.12	458597	.	T	C	.	.	ANN=C	synonymous_variant	LOW	LinJ.12.0720	LinJ.12.0720	transcript	LinJ.12.0720:mRNA	protein_coding	2019-01-01	c.2649T>C	p.His883His	2649/3864	2649/3864	883/1287
LinJ.12	458601	.	T	C	.	.	ANN=C	synonymous_variant	LOW	LinJ.12.0720	LinJ.12.0720	transcript	LinJ.12.0720:mRNA	protein_coding	2019-01-01	c.2653T>C	p.Leu885Leu	2653/3864	2653/3864	885/1287
LinJ.12	459024	.	A	C	.	.	ANN=C	missense_variant	MODERATE	LinJ.12.0720	LinJ.12.0720	transcript	LinJ.12.0720:mRNA	protein_coding	2019-01-01	c.3076A>C	p.Ser1026Arg	3076/3864	3076/3864	1026/1287
LinJ.12	459113	.	T	C	.	.	ANN=C	synonymous_variant	LOW	LinJ.12.0720	LinJ.12.0720	transcript	LinJ.12.0720:mRNA	protein_coding	2019-01-01	c.3165T>C	p.Ile1055Ile	3165/3864	3165/3864	1055/1287
LinJ.12	459143	.	C	A	.	.	ANN=A	missense_variant	MODERATE	LinJ.12.0720	LinJ.12.0720	transcript	LinJ.12.0720:mRNA	protein_coding	2019-01-01	c.3195C>A	p.Asp1065Glu	3195/3864	3195/3864	1065/1287
LinJ.12	459602	.	G	T	.	.	ANN=T	synonymous_variant	LOW	LinJ.12.0720	LinJ.12.0720	transcript	LinJ.12.0720:mRNA	protein_coding	2019-01-01	c.3654G>T	p.Leu1218Leu	3654/3864	3654/3864	1218/1287
LinJ.12	459916	.	T	C	.	.	ANN=C	intergenic_region	MODIFIER	LinJ.12.0720-LinJ.12.0070	LinJ.12.0720-LinJ.12.0070	intergenic_region	LinJ.12.0720-LinJ.12.0070	n.459916T>C
LinJ.12	459932	.	T	C	.	.	ANN=C	intergenic_region	MODIFIER	LinJ.12.0720-LinJ.12.0070	LinJ.12.0720-LinJ.12.0070	intergenic_region	LinJ.12.0720-LinJ.12.0070	n.459932T>C
LinJ.12	460296	.	C	A	.	.	ANN=A	intergenic_region	MODIFIER	LinJ.12.0720-LinJ.12.0070	LinJ.12.0720-LinJ.12.0070	intergenic_region	LinJ.12.0720-LinJ.12.0070	n.460296C>A
LinJ.12	460330	.	C	G	.	.	ANN=G	intergenic_region	MODIFIER	LinJ.12.0720-LinJ.12.0070	LinJ.12.0720-LinJ.12.0070	intergenic_region	LinJ.12.0720-LinJ.12.0070	n.460330C>G
LinJ.12	460358	.	T	C	.	.	ANN=C	intergenic_region	MODIFIER	LinJ.12.0720-LinJ.12.0070	LinJ.12.0720-LinJ.12.0070	intergenic_region	LinJ.12.0720-LinJ.12.0070	n.460358T>C
LinJ.12	462028	.	T	C	.	.	ANN=C	intergenic_region	MODIFIER	LinJ.12.0720-LinJ.12.0070	LinJ.12.0720-LinJ.12.0070	intergenic_region	LinJ.12.0720-LinJ.12.0070	n.462028T>C
LinJ.12	462051	.	A	G	.	.	ANN=G	intergenic_region	MODIFIER	LinJ.12.0720-LinJ.12.0070	LinJ.12.0720-LinJ.12.0070	intergenic_region	LinJ.12.0720-LinJ.12.0070	n.462051A>G
LinJ.12	462396	.	A	C	.	.	ANN=C	intergenic_region	MODIFIER	LinJ.12.0720-LinJ.12.0070	LinJ.12.0720-LinJ.12.0070	intergenic_region	LinJ.12.0720-LinJ.12.0070	n.462396A>C
LinJ.12	462523	.	C	G	.	.	ANN=G	intergenic_region	MODIFIER	LinJ.12.0720-LinJ.12.0070	LinJ.12.0720-LinJ.12.0070	intergenic_region	LinJ.12.0720-LinJ.12.0070	n.462523C>G
LinJ.12	465340	.	C	G	.	.	ANN=G	missense_variant	MODERATE	LinJ.12.0070	LinJ.12.0070	transcript	LinJ.12.0070:mRNA	protein_coding	2019-01-01	c.1730C>G	p.Ala577Gly	1730/2712	1730/2712	577/903
LinJ.12	466734	.	C	T	.	.	ANN=T	intergenic_region	MODIFIER	LinJ.12.0070-LinJ.12.0060	LinJ.12.0070-LinJ.12.0060	intergenic_region	LinJ.12.0070-LinJ.12.0060	n.466734C>T
LinJ.12	466904	.	G	C	.	.	ANN=C	intergenic_region	MODIFIER	LinJ.12.0070-LinJ.12.0060	LinJ.12.0070-LinJ.12.0060	intergenic_region	LinJ.12.0070-LinJ.12.0060	n.466904G>C
LinJ.12	467461	.	A	G	.	.	ANN=G	intergenic_region	MODIFIER	LinJ.12.0070-LinJ.12.0060	LinJ.12.0070-LinJ.12.0060	intergenic_region	LinJ.12.0070-LinJ.12.0060	n.467461A>G
LinJ.12	467711	.	A	G	.	.	ANN=G	intergenic_region	MODIFIER	LinJ.12.0070-LinJ.12.0060	LinJ.12.0070-LinJ.12.0060	intergenic_region	LinJ.12.0070-LinJ.12.0060	n.467711A>G
LinJ.12	467803	.	A	G	.	.	ANN=G	intergenic_region	MODIFIER	LinJ.12.0070-LinJ.12.0060	LinJ.12.0070-LinJ.12.0060	intergenic_region	LinJ.12.0070-LinJ.12.0060	n.467803A>G
LinJ.12	472981	.	G	T	.	.	ANN=T	intergenic_region	MODIFIER	LinJ.12.0060-LinJ.12.0050	LinJ.12.0060-LinJ.12.0050	intergenic_region	LinJ.12.0060-LinJ.12.0050	n.472981G>T
LinJ.12	473040	.	A	G	.	.	ANN=G	intergenic_region	MODIFIER	LinJ.12.0060-LinJ.12.0050	LinJ.12.0060-LinJ.12.0050	intergenic_region	LinJ.12.0060-LinJ.12.0050	n.473040A>G
LinJ.12	473122	.	C	A	.	.	ANN=A	intergenic_region	MODIFIER	LinJ.12.0060-LinJ.12.0050	LinJ.12.0060-LinJ.12.0050	intergenic_region	LinJ.12.0060-LinJ.12.0050	n.473122C>A
LinJ.12	473126	.	A	G	.	.	ANN=G	intergenic_region	MODIFIER	LinJ.12.0060-LinJ.12.0050	LinJ.12.0060-LinJ.12.0050	intergenic_region	LinJ.12.0060-LinJ.12.0050	n.473126A>G
LinJ.12	475996	.	C	G	.	.	ANN=G	intergenic_region	MODIFIER	LinJ.12.0060-LinJ.12.0050	LinJ.12.0060-LinJ.12.0050	intergenic_region	LinJ.12.0060-LinJ.12.0050	n.475996C>G
LinJ.12	477471	.	T	C,G	.	.	ANN=C	missense_variant	MODERATE	LinJ.12.0050	LinJ.12.0050	transcript	LinJ.12.0050:mRNA	protein_coding	2019-01-01	c.857T>C	p.Val286Ala	857/1771	857/1770	286/589	WARNING_TRANSCRIPT_NO_STOP_CODON,G	missense_variant	MODERATE	LinJ.12.0050	LinJ.12.0050	transcript	LinJ.12.0050:mRNA	protein_coding	2019-01-01	c.857T>G	p.Val286Gly	857/1771	857/1770	286/589	WARNING_TRANSCRIPT_NO_STOP_CODON
LinJ.12	477737	.	G	T	.	.	ANN=T	missense_variant	MODERATE	LinJ.12.0050	LinJ.12.0050	transcript	LinJ.12.0050:mRNA	protein_coding	2019-01-01	c.1123G>T	p.Ala375Ser	1123/1771	1123/1770	375/589	WARNING_TRANSCRIPT_NO_STOP_CODON
LinJ.12	477817	.	T	C	.	.	ANN=C	synonymous_variant	LOW	LinJ.12.0050	LinJ.12.0050	transcript	LinJ.12.0050:mRNA	protein_coding	2019-01-01	c.1203T>C	p.Pro401Pro	1203/1771	1203/1770	401/589	WARNING_TRANSCRIPT_NO_STOP_CODON
LinJ.12	478847	.	A	G	.	.	ANN=G	intergenic_region	MODIFIER	LinJ.12.0050-LinJ.12.0730	LinJ.12.0050-LinJ.12.0730	intergenic_region	LinJ.12.0050-LinJ.12.0730	n.478847A>G
LinJ.12	478881	.	A	T	.	.	ANN=T	intergenic_region	MODIFIER	LinJ.12.0050-LinJ.12.0730	LinJ.12.0050-LinJ.12.0730	intergenic_region	LinJ.12.0050-LinJ.12.0730	n.478881A>T
LinJ.12	479072	.	G	A	.	.	ANN=A	intergenic_region	MODIFIER	LinJ.12.0050-LinJ.12.0730	LinJ.12.0050-LinJ.12.0730	intergenic_region	LinJ.12.0050-LinJ.12.0730	n.479072G>A
LinJ.12	479136	.	A	C	.	.	ANN=C	intergenic_region	MODIFIER	LinJ.12.0050-LinJ.12.0730	LinJ.12.0050-LinJ.12.0730	intergenic_region	LinJ.12.0050-LinJ.12.0730	n.479136A>C
LinJ.12	479180	.	C	T	.	.	ANN=T	intergenic_region	MODIFIER	LinJ.12.0050-LinJ.12.0730	LinJ.12.0050-LinJ.12.0730	intergenic_region	LinJ.12.0050-LinJ.12.0730	n.479180C>T
LinJ.12	479346	.	G	T	.	.	ANN=T	intergenic_region	MODIFIER	LinJ.12.0050-LinJ.12.0730	LinJ.12.0050-LinJ.12.0730	intergenic_region	LinJ.12.0050-LinJ.12.0730	n.479346G>T
LinJ.12	479411	.	A	G	.	.	ANN=G	intergenic_region	MODIFIER	LinJ.12.0050-LinJ.12.0730	LinJ.12.0050-LinJ.12.0730	intergenic_region	LinJ.12.0050-LinJ.12.0730	n.479411A>G
LinJ.12	479505	.	C	T	.	.	ANN=T	intergenic_region	MODIFIER	LinJ.12.0050-LinJ.12.0730	LinJ.12.0050-LinJ.12.0730	intergenic_region	LinJ.12.0050-LinJ.12.0730	n.479505C>T
LinJ.12	479857	.	A	G	.	.	ANN=G	intergenic_region	MODIFIER	LinJ.12.0050-LinJ.12.0730	LinJ.12.0050-LinJ.12.0730	intergenic_region	LinJ.12.0050-LinJ.12.0730	n.479857A>G
LinJ.12	480969	.	A	G	.	.	ANN=G	synonymous_variant	LOW	LinJ.12.0730	LinJ.12.0730	transcript	LinJ.12.0730:mRNA	protein_coding	2019-01-01	c.1089A>G	p.Pro363Pro	1089/1098	1089/1098	363/365
LinJ.12	480976	.	T	G	.	.	ANN=G	stop_lost&splice_region_variant	HIGH	LinJ.12.0730	LinJ.12.0730	transcript	LinJ.12.0730:mRNA	protein_coding	2019-01-01	c.1096T>G	p.Ter366Gluext*?	1096/1098	1096/1098	366/365
LinJ.12	481580	.	T	C	.	.	ANN=C	intergenic_region	MODIFIER	LinJ.12.0730-LinJ.12.0740	LinJ.12.0730-LinJ.12.0740	intergenic_region	LinJ.12.0730-LinJ.12.0740	n.481580T>C
LinJ.12	481732	.	C	G	.	.	ANN=G	intergenic_region	MODIFIER	LinJ.12.0730-LinJ.12.0740	LinJ.12.0730-LinJ.12.0740	intergenic_region	LinJ.12.0730-LinJ.12.0740	n.481732C>G
LinJ.12	483150	.	C	A	.	.	ANN=A	intergenic_region	MODIFIER	LinJ.12.0730-LinJ.12.0740	LinJ.12.0730-LinJ.12.0740	intergenic_region	LinJ.12.0730-LinJ.12.0740	n.483150C>A
LinJ.12	483239	.	C	T	.	.	ANN=T	intergenic_region	MODIFIER	LinJ.12.0730-LinJ.12.0740	LinJ.12.0730-LinJ.12.0740	intergenic_region	LinJ.12.0730-LinJ.12.0740	n.483239C>T
LinJ.12	483654	.	A	G	.	.	ANN=G	intergenic_region	MODIFIER	LinJ.12.0730-LinJ.12.0740	LinJ.12.0730-LinJ.12.0740	intergenic_region	LinJ.12.0730-LinJ.12.0740	n.483654A>G
LinJ.12	483732	.	G	C	.	.	ANN=C	intergenic_region	MODIFIER	LinJ.12.0730-LinJ.12.0740	LinJ.12.0730-LinJ.12.0740	intergenic_region	LinJ.12.0730-LinJ.12.0740	n.483732G>C
LinJ.12	484175	.	A	G	.	.	ANN=G	intergenic_region	MODIFIER	LinJ.12.0730-LinJ.12.0740	LinJ.12.0730-LinJ.12.0740	intergenic_region	LinJ.12.0730-LinJ.12.0740	n.484175A>G
LinJ.12	484531	.	T	C	.	.	ANN=C	intergenic_region	MODIFIER	LinJ.12.0730-LinJ.12.0740	LinJ.12.0730-LinJ.12.0740	intergenic_region	LinJ.12.0730-LinJ.12.0740	n.484531T>C
LinJ.12	485609	.	C	A	.	.	ANN=A	missense_variant	MODERATE	LinJ.12.0740	LinJ.12.0740	transcript	LinJ.12.0740:mRNA	protein_coding	2019-01-01	c.264C>A	p.Asp88Glu	264/2487	264/2487	88/828
LinJ.12	489025	.	A	G	.	.	ANN=G	intergenic_region	MODIFIER	LinJ.12.0740-LinJ.12.0750	LinJ.12.0740-LinJ.12.0750	intergenic_region	LinJ.12.0740-LinJ.12.0750	n.489025A>G
LinJ.12	490056	.	T	C	.	.	ANN=C	intergenic_region	MODIFIER	LinJ.12.0740-LinJ.12.0750	LinJ.12.0740-LinJ.12.0750	intergenic_region	LinJ.12.0740-LinJ.12.0750	n.490056T>C
LinJ.12	490501	.	C	T	.	.	ANN=T	intergenic_region	MODIFIER	LinJ.12.0740-LinJ.12.0750	LinJ.12.0740-LinJ.12.0750	intergenic_region	LinJ.12.0740-LinJ.12.0750	n.490501C>T
LinJ.12	491578	.	A	G	.	.	ANN=G	intergenic_region	MODIFIER	LinJ.12.0740-LinJ.12.0750	LinJ.12.0740-LinJ.12.0750	intergenic_region	LinJ.12.0740-LinJ.12.0750	n.491578A>G
LinJ.12	500227	.	T	C	.	.	ANN=C	synonymous_variant	LOW	LinJ.12.0760	LinJ.12.0760	transcript	LinJ.12.0760:mRNA	protein_coding	2019-01-01	c.1923T>C	p.Leu641Leu	1923/2844	1923/2844	641/947
LinJ.12	501344	.	A	G	.	.	ANN=G	intergenic_region	MODIFIER	LinJ.12.0760-LinJ.12.0770	LinJ.12.0760-LinJ.12.0770	intergenic_region	LinJ.12.0760-LinJ.12.0770	n.501344A>G
LinJ.12	501478	.	G	C	.	.	ANN=C	intergenic_region	MODIFIER	LinJ.12.0760-LinJ.12.0770	LinJ.12.0760-LinJ.12.0770	intergenic_region	LinJ.12.0760-LinJ.12.0770	n.501478G>C
LinJ.12	501858	.	T	G	.	.	ANN=G	intergenic_region	MODIFIER	LinJ.12.0760-LinJ.12.0770	LinJ.12.0760-LinJ.12.0770	intergenic_region	LinJ.12.0760-LinJ.12.0770	n.501858T>G
LinJ.12	501861	.	T	C	.	.	ANN=C	intergenic_region	MODIFIER	LinJ.12.0760-LinJ.12.0770	LinJ.12.0760-LinJ.12.0770	intergenic_region	LinJ.12.0760-LinJ.12.0770	n.501861T>C
LinJ.12	501917	.	C	T	.	.	ANN=T	intergenic_region	MODIFIER	LinJ.12.0760-LinJ.12.0770	LinJ.12.0760-LinJ.12.0770	intergenic_region	LinJ.12.0760-LinJ.12.0770	n.501917C>T
LinJ.12	502048	.	T	G	.	.	ANN=G	intergenic_region	MODIFIER	LinJ.12.0760-LinJ.12.0770	LinJ.12.0760-LinJ.12.0770	intergenic_region	LinJ.12.0760-LinJ.12.0770	n.502048T>G
LinJ.12	502124	.	C	T	.	.	ANN=T	intergenic_region	MODIFIER	LinJ.12.0760-LinJ.12.0770	LinJ.12.0760-LinJ.12.0770	intergenic_region	LinJ.12.0760-LinJ.12.0770	n.502124C>T
LinJ.12	504488	.	A	G	.	.	ANN=G	synonymous_variant	LOW	LinJ.12.0770	LinJ.12.0770	transcript	LinJ.12.0770:mRNA	protein_coding	2019-01-01	c.1356A>G	p.Gly452Gly	1356/2103	1356/2103	452/700
LinJ.12	505651	.	G	A	.	.	ANN=A	intergenic_region	MODIFIER	LinJ.12.0770-LinJ.12.0780	LinJ.12.0770-LinJ.12.0780	intergenic_region	LinJ.12.0770-LinJ.12.0780	n.505651G>A
LinJ.12	505792	.	T	C	.	.	ANN=C	intergenic_region	MODIFIER	LinJ.12.0770-LinJ.12.0780	LinJ.12.0770-LinJ.12.0780	intergenic_region	LinJ.12.0770-LinJ.12.0780	n.505792T>C
LinJ.12	507286	.	T	C	.	.	ANN=C	synonymous_variant	LOW	LinJ.12.0780	LinJ.12.0780	transcript	LinJ.12.0780:mRNA	protein_coding	2019-01-01	c.1056T>C	p.Val352Val	1056/2634	1056/2634	352/877
LinJ.12	509228	.	T	C	.	.	ANN=C	intergenic_region	MODIFIER	LinJ.12.0780-LinJ.12.0790	LinJ.12.0780-LinJ.12.0790	intergenic_region	LinJ.12.0780-LinJ.12.0790	n.509228T>C
LinJ.12	509320	.	A	C	.	.	ANN=C	intergenic_region	MODIFIER	LinJ.12.0780-LinJ.12.0790	LinJ.12.0780-LinJ.12.0790	intergenic_region	LinJ.12.0780-LinJ.12.0790	n.509320A>C
LinJ.12	509469	.	C	T	.	.	ANN=T	intergenic_region	MODIFIER	LinJ.12.0780-LinJ.12.0790	LinJ.12.0780-LinJ.12.0790	intergenic_region	LinJ.12.0780-LinJ.12.0790	n.509469C>T
LinJ.12	509527	.	A	G	.	.	ANN=G	intergenic_region	MODIFIER	LinJ.12.0780-LinJ.12.0790	LinJ.12.0780-LinJ.12.0790	intergenic_region	LinJ.12.0780-LinJ.12.0790	n.509527A>G
LinJ.12	513794	.	G	T	.	.	ANN=T	missense_variant	MODERATE	LinJ.12.0790	LinJ.12.0790	transcript	LinJ.12.0790:mRNA	protein_coding	2019-01-01	c.3220G>T	p.Gly1074Cys	3220/4827	3220/4827	1074/1608
LinJ.12	513841	.	T	C	.	.	ANN=C	synonymous_variant	LOW	LinJ.12.0790	LinJ.12.0790	transcript	LinJ.12.0790:mRNA	protein_coding	2019-01-01	c.3267T>C	p.Ser1089Ser	3267/4827	3267/4827	1089/1608
LinJ.12	516932	.	T	C	.	.	ANN=C	intergenic_region	MODIFIER	LinJ.12.0790-LinJ.12.0800	LinJ.12.0790-LinJ.12.0800	intergenic_region	LinJ.12.0790-LinJ.12.0800	n.516932T>C
LinJ.12	520907	.	T	C	.	.	ANN=C	intergenic_region	MODIFIER	LinJ.12.0800-LinJ.12.0810	LinJ.12.0800-LinJ.12.0810	intergenic_region	LinJ.12.0800-LinJ.12.0810	n.520907T>C
LinJ.12	520938	.	T	C	.	.	ANN=C	intergenic_region	MODIFIER	LinJ.12.0800-LinJ.12.0810	LinJ.12.0800-LinJ.12.0810	intergenic_region	LinJ.12.0800-LinJ.12.0810	n.520938T>C
LinJ.12	520954	.	G	C	.	.	ANN=C	intergenic_region	MODIFIER	LinJ.12.0800-LinJ.12.0810	LinJ.12.0800-LinJ.12.0810	intergenic_region	LinJ.12.0800-LinJ.12.0810	n.520954G>C
LinJ.12	521000	.	C	T	.	.	ANN=T	intergenic_region	MODIFIER	LinJ.12.0800-LinJ.12.0810	LinJ.12.0800-LinJ.12.0810	intergenic_region	LinJ.12.0800-LinJ.12.0810	n.521000C>T
LinJ.12	521008	.	T	A	.	.	ANN=A	intergenic_region	MODIFIER	LinJ.12.0800-LinJ.12.0810	LinJ.12.0800-LinJ.12.0810	intergenic_region	LinJ.12.0800-LinJ.12.0810	n.521008T>A
LinJ.12	521124	.	T	C	.	.	ANN=C	intergenic_region	MODIFIER	LinJ.12.0800-LinJ.12.0810	LinJ.12.0800-LinJ.12.0810	intergenic_region	LinJ.12.0800-LinJ.12.0810	n.521124T>C
LinJ.12	521150	.	G	C	.	.	ANN=C	intergenic_region	MODIFIER	LinJ.12.0800-LinJ.12.0810	LinJ.12.0800-LinJ.12.0810	intergenic_region	LinJ.12.0800-LinJ.12.0810	n.521150G>C
LinJ.12	521158	.	G	C	.	.	ANN=C	intergenic_region	MODIFIER	LinJ.12.0800-LinJ.12.0810	LinJ.12.0800-LinJ.12.0810	intergenic_region	LinJ.12.0800-LinJ.12.0810	n.521158G>C
LinJ.12	521600	.	G	C	.	.	ANN=C	intergenic_region	MODIFIER	LinJ.12.0800-LinJ.12.0810	LinJ.12.0800-LinJ.12.0810	intergenic_region	LinJ.12.0800-LinJ.12.0810	n.521600G>C
LinJ.12	521690	.	A	G	.	.	ANN=G	intergenic_region	MODIFIER	LinJ.12.0800-LinJ.12.0810	LinJ.12.0800-LinJ.12.0810	intergenic_region	LinJ.12.0800-LinJ.12.0810	n.521690A>G
LinJ.12	523684	.	A	G	.	.	ANN=G	synonymous_variant	LOW	LinJ.12.0820	LinJ.12.0820	transcript	LinJ.12.0820:mRNA	protein_coding	2019-01-01	c.183A>G	p.Val61Val	183/2601	183/2601	61/866
LinJ.12	524590	.	A	C	.	.	ANN=C	missense_variant	MODERATE	LinJ.12.0820	LinJ.12.0820	transcript	LinJ.12.0820:mRNA	protein_coding	2019-01-01	c.1089A>C	p.Gln363His	1089/2601	1089/2601	363/866
LinJ.12	526203	.	C	G	.	.	ANN=G	intergenic_region	MODIFIER	LinJ.12.0820-LinJ.12.0830	LinJ.12.0820-LinJ.12.0830	intergenic_region	LinJ.12.0820-LinJ.12.0830	n.526203C>G
LinJ.12	526245	.	C	T	.	.	ANN=T	intergenic_region	MODIFIER	LinJ.12.0820-LinJ.12.0830	LinJ.12.0820-LinJ.12.0830	intergenic_region	LinJ.12.0820-LinJ.12.0830	n.526245C>T
LinJ.12	526615	.	A	C	.	.	ANN=C	intergenic_region	MODIFIER	LinJ.12.0820-LinJ.12.0830	LinJ.12.0820-LinJ.12.0830	intergenic_region	LinJ.12.0820-LinJ.12.0830	n.526615A>C
LinJ.12	526834	.	T	C	.	.	ANN=C	intergenic_region	MODIFIER	LinJ.12.0820-LinJ.12.0830	LinJ.12.0820-LinJ.12.0830	intergenic_region	LinJ.12.0820-LinJ.12.0830	n.526834T>C
LinJ.12	527477	.	C	T	.	.	ANN=T	intergenic_region	MODIFIER	LinJ.12.0820-LinJ.12.0830	LinJ.12.0820-LinJ.12.0830	intergenic_region	LinJ.12.0820-LinJ.12.0830	n.527477C>T
LinJ.12	528018	.	A	T	.	.	ANN=T	intergenic_region	MODIFIER	LinJ.12.0820-LinJ.12.0830	LinJ.12.0820-LinJ.12.0830	intergenic_region	LinJ.12.0820-LinJ.12.0830	n.528018A>T
LinJ.12	529311	.	C	T	.	.	ANN=T	synonymous_variant	LOW	LinJ.12.0830	LinJ.12.0830	transcript	LinJ.12.0830:mRNA	protein_coding	2019-01-01	c.1230C>T	p.Phe410Phe	1230/4119	1230/4119	410/1372
LinJ.12	530311	.	T	A	.	.	ANN=A	missense_variant	MODERATE	LinJ.12.0830	LinJ.12.0830	transcript	LinJ.12.0830:mRNA	protein_coding	2019-01-01	c.2230T>A	p.Ser744Thr	2230/4119	2230/4119	744/1372
LinJ.12	532146	.	T	C	.	.	ANN=C	synonymous_variant	LOW	LinJ.12.0830	LinJ.12.0830	transcript	LinJ.12.0830:mRNA	protein_coding	2019-01-01	c.4065T>C	p.Pro1355Pro	4065/4119	4065/4119	1355/1372
LinJ.12	532239	.	A	G	.	.	ANN=G	intergenic_region	MODIFIER	LinJ.12.0830-LinJ.12.0840	LinJ.12.0830-LinJ.12.0840	intergenic_region	LinJ.12.0830-LinJ.12.0840	n.532239A>G
LinJ.12	532266	.	A	G	.	.	ANN=G	intergenic_region	MODIFIER	LinJ.12.0830-LinJ.12.0840	LinJ.12.0830-LinJ.12.0840	intergenic_region	LinJ.12.0830-LinJ.12.0840	n.532266A>G
LinJ.12	532338	.	T	C	.	.	ANN=C	intergenic_region	MODIFIER	LinJ.12.0830-LinJ.12.0840	LinJ.12.0830-LinJ.12.0840	intergenic_region	LinJ.12.0830-LinJ.12.0840	n.532338T>C
LinJ.12	532538	.	A	G	.	.	ANN=G	intergenic_region	MODIFIER	LinJ.12.0830-LinJ.12.0840	LinJ.12.0830-LinJ.12.0840	intergenic_region	LinJ.12.0830-LinJ.12.0840	n.532538A>G
LinJ.12	534379	.	A	G	.	.	ANN=G	synonymous_variant	LOW	LinJ.12.0840	LinJ.12.0840	transcript	LinJ.12.0840:mRNA	protein_coding	2019-01-01	c.942A>G	p.Ala314Ala	942/1320	942/1320	314/439
LinJ.12	534466	.	T	G	.	.	ANN=G	synonymous_variant	LOW	LinJ.12.0840	LinJ.12.0840	transcript	LinJ.12.0840:mRNA	protein_coding	2019-01-01	c.1029T>G	p.Leu343Leu	1029/1320	1029/1320	343/439
LinJ.12	535019	.	C	T	.	.	ANN=T	intergenic_region	MODIFIER	LinJ.12.0840-LinJ.12.0850	LinJ.12.0840-LinJ.12.0850	intergenic_region	LinJ.12.0840-LinJ.12.0850	n.535019C>T
LinJ.12	535625	.	C	T	.	.	ANN=T	intergenic_region	MODIFIER	LinJ.12.0840-LinJ.12.0850	LinJ.12.0840-LinJ.12.0850	intergenic_region	LinJ.12.0840-LinJ.12.0850	n.535625C>T
LinJ.12	535763	.	C	G	.	.	ANN=G	intergenic_region	MODIFIER	LinJ.12.0840-LinJ.12.0850	LinJ.12.0840-LinJ.12.0850	intergenic_region	LinJ.12.0840-LinJ.12.0850	n.535763C>G
LinJ.12	535849	.	T	C	.	.	ANN=C	intergenic_region	MODIFIER	LinJ.12.0840-LinJ.12.0850	LinJ.12.0840-LinJ.12.0850	intergenic_region	LinJ.12.0840-LinJ.12.0850	n.535849T>C
LinJ.12	536493	.	G	A	.	.	ANN=A	intergenic_region	MODIFIER	LinJ.12.0840-LinJ.12.0850	LinJ.12.0840-LinJ.12.0850	intergenic_region	LinJ.12.0840-LinJ.12.0850	n.536493G>A
LinJ.12	537997	.	G	A	.	.	ANN=A	synonymous_variant	LOW	LinJ.12.0850	LinJ.12.0850	transcript	LinJ.12.0850:mRNA	protein_coding	2019-01-01	c.297G>A	p.Ala99Ala	297/1032	297/1032	99/343
LinJ.12	540528	.	C	G	.	.	ANN=G	missense_variant	MODERATE	LinJ.12.0860	LinJ.12.0860	transcript	LinJ.12.0860:mRNA	protein_coding	2019-01-01	c.307C>G	p.Pro103Ala	307/1920	307/1920	103/639
LinJ.12	541193	.	T	C	.	.	ANN=C	synonymous_variant	LOW	LinJ.12.0860	LinJ.12.0860	transcript	LinJ.12.0860:mRNA	protein_coding	2019-01-01	c.972T>C	p.Asp324Asp	972/1920	972/1920	324/639
LinJ.12	543178	.	G	A	.	.	ANN=A	synonymous_variant	LOW	LinJ.12.0870	LinJ.12.0870	transcript	LinJ.12.0870:mRNA	protein_coding	2019-01-01	c.6G>A	p.Glu2Glu	6/642	6/642	2/213
LinJ.12	543679	.	T	C	.	.	ANN=C	synonymous_variant	LOW	LinJ.12.0870	LinJ.12.0870	transcript	LinJ.12.0870:mRNA	protein_coding	2019-01-01	c.507T>C	p.Leu169Leu	507/642	507/642	169/213
LinJ.12	545065	.	G	A	.	.	ANN=A	missense_variant	MODERATE	LinJ.12.0880	LinJ.12.0880	transcript	LinJ.12.0880:mRNA	protein_coding	2019-01-01	c.793G>A	p.Asp265Asn	793/1869	793/1869	265/622
LinJ.12	547081	.	C	T	.	.	ANN=T	intergenic_region	MODIFIER	LinJ.12.0880-LinJ.12.0890	LinJ.12.0880-LinJ.12.0890	intergenic_region	LinJ.12.0880-LinJ.12.0890	n.547081C>T
LinJ.12	549641	.	A	G	.	.	ANN=G	synonymous_variant	LOW	LinJ.12.0900	LinJ.12.0900	transcript	LinJ.12.0900:mRNA	protein_coding	2019-01-01	c.1299A>G	p.Gly433Gly	1299/2613	1299/2613	433/870
LinJ.12	550568	.	G	C	.	.	ANN=C	synonymous_variant	LOW	LinJ.12.0900	LinJ.12.0900	transcript	LinJ.12.0900:mRNA	protein_coding	2019-01-01	c.2226G>C	p.Ser742Ser	2226/2613	2226/2613	742/870
LinJ.12	553073	.	G	T	.	.	ANN=T	missense_variant	MODERATE	LinJ.12.0910	LinJ.12.0910	transcript	LinJ.12.0910:mRNA	protein_coding	2019-01-01	c.1444G>T	p.Ala482Ser	1444/2916	1444/2916	482/971
LinJ.12	553261	.	A	G	.	.	ANN=G	synonymous_variant	LOW	LinJ.12.0910	LinJ.12.0910	transcript	LinJ.12.0910:mRNA	protein_coding	2019-01-01	c.1632A>G	p.Glu544Glu	1632/2916	1632/2916	544/971
LinJ.12	555073	.	C	G	.	.	ANN=G	intergenic_region	MODIFIER	LinJ.12.0910-LinJ.12.0920	LinJ.12.0910-LinJ.12.0920	intergenic_region	LinJ.12.0910-LinJ.12.0920	n.555073C>G
LinJ.12	555314	.	A	C	.	.	ANN=C	intergenic_region	MODIFIER	LinJ.12.0910-LinJ.12.0920	LinJ.12.0910-LinJ.12.0920	intergenic_region	LinJ.12.0910-LinJ.12.0920	n.555314A>C
LinJ.12	557011	.	T	C	.	.	ANN=C	synonymous_variant	LOW	LinJ.12.0920	LinJ.12.0920	transcript	LinJ.12.0920:mRNA	protein_coding	2019-01-01	c.1560T>C	p.Pro520Pro	1560/1863	1560/1863	520/620
LinJ.12	557936	.	A	C	.	.	ANN=C	intergenic_region	MODIFIER	LinJ.12.0920-LinJ.12.0930	LinJ.12.0920-LinJ.12.0930	intergenic_region	LinJ.12.0920-LinJ.12.0930	n.557936A>C
LinJ.12	558187	.	A	C	.	.	ANN=C	intergenic_region	MODIFIER	LinJ.12.0920-LinJ.12.0930	LinJ.12.0920-LinJ.12.0930	intergenic_region	LinJ.12.0920-LinJ.12.0930	n.558187A>C
LinJ.12	560592	.	T	C	.	.	ANN=C	intergenic_region	MODIFIER	LinJ.12.0920-LinJ.12.0930	LinJ.12.0920-LinJ.12.0930	intergenic_region	LinJ.12.0920-LinJ.12.0930	n.560592T>C
LinJ.12	560827	.	C	G	.	.	ANN=G	intergenic_region	MODIFIER	LinJ.12.0920-LinJ.12.0930	LinJ.12.0920-LinJ.12.0930	intergenic_region	LinJ.12.0920-LinJ.12.0930	n.560827C>G
LinJ.12	561611	.	A	G	.	.	ANN=G	intergenic_region	MODIFIER	LinJ.12.0920-LinJ.12.0930	LinJ.12.0920-LinJ.12.0930	intergenic_region	LinJ.12.0920-LinJ.12.0930	n.561611A>G
LinJ.12	561667	.	G	A	.	.	ANN=A	intergenic_region	MODIFIER	LinJ.12.0920-LinJ.12.0930	LinJ.12.0920-LinJ.12.0930	intergenic_region	LinJ.12.0920-LinJ.12.0930	n.561667G>A
LinJ.12	561816	.	G	T	.	.	ANN=T	intergenic_region	MODIFIER	LinJ.12.0920-LinJ.12.0930	LinJ.12.0920-LinJ.12.0930	intergenic_region	LinJ.12.0920-LinJ.12.0930	n.561816G>T
LinJ.12	562577	.	C	G	.	.	ANN=G	missense_variant	MODERATE	LinJ.12.0930	LinJ.12.0930	transcript	LinJ.12.0930:mRNA	protein_coding	2019-01-01	c.326C>G	p.Thr109Ser	326/1317	326/1317	109/438
LinJ.12	563855	.	G	C	.	.	ANN=C	intergenic_region	MODIFIER
LinJ.12	563946	.	T	C	.	.	ANN=C	intergenic_region	MODIFIER
LinJ.12	564074	.	A	T	.	.	ANN=T	intergenic_region	MODIFIER
LinJ.12	564195	.	G	A	.	.	ANN=A	intergenic_region	MODIFIER
LinJ.12	564209	.	G	C	.	.	ANN=C	intergenic_region	MODIFIER
[truncated: 9,236 more rows]

## Sheet: SNPeff_Ldon1star_44
Marker SNPs for the Ldon1 group, excluding samples of putatively mixed clone origin.
All SNPs have been annotated with SNPeff.
##SnpEffVersion="4.2 (build 2015-12-05), by Pablo Cingolani"
##SnpEffCmd="SnpEff -i vcf -csvStats SNPeff_Ldon1star_44/SNPeff_Ldon1star_44_stats TT38_Linf_JPCM5 /lustre/scratch118/infgen/team133/sf18/leish_donovaniComplex/A13_SNPeff_fixed_segr_cats/allSNPs_NA.frac0.2_poly_Ldon1star_44.vcf "
##INFO=<ID=ANN,Number=.,Type=String,Description="Functional annotations: 'Allele | Annotation | Annotation_Impact | Gene_Name | Gene_ID | Feature_Type | Feature_ID | Transcript_BioType | Rank | HGVS.c | HGVS.p | cDNA.pos / cDNA.length | CDS.pos / CDS.length | AA.pos / AA.length | Distance | ERRORS / WARNINGS / INFO' ">
##INFO=<ID=LOF,Number=.,Type=String,Description="Predicted loss of function effects for this variant. Format: 'Gene_Name | Gene_ID | Number_of_transcripts_in_gene | Percent_of_transcripts_affected' ">
##INFO=<ID=NMD,Number=.,Type=String,Description="Predicted nonsense mediated decay effects for this variant. Format: 'Gene_Name | Gene_ID | Number_of_transcripts_in_gene | Percent_of_transcripts_affected' ">
#CHROM	POS	ID	REF	ALT	QUAL	FILTER	INFO
LinJ.01	13127	.	G	A	.	.	ANN=A	intergenic_region	MODIFIER	LinJ.01.0040-LinJ.01.0050	LinJ.01.0040-LinJ.01.0050	intergenic_region	LinJ.01.0040-LinJ.01.0050	n.13127G>A
LinJ.01	28261	.	G	T	.	.	ANN=T	intergenic_region	MODIFIER	LinJ.01.0100-LinJ.01.0110	LinJ.01.0100-LinJ.01.0110	intergenic_region	LinJ.01.0100-LinJ.01.0110	n.28261G>T
LinJ.01	28655	.	A	G	.	.	ANN=G	intergenic_region	MODIFIER	LinJ.01.0100-LinJ.01.0110	LinJ.01.0100-LinJ.01.0110	intergenic_region	LinJ.01.0100-LinJ.01.0110	n.28655A>G
LinJ.01	33190	.	A	G	.	.	ANN=G	intergenic_region	MODIFIER	LinJ.01.0120-LinJ.01.0130	LinJ.01.0120-LinJ.01.0130	intergenic_region	LinJ.01.0120-LinJ.01.0130	n.33190A>G
LinJ.01	34247	.	C	G	.	.	ANN=G	missense_variant	MODERATE	LinJ.01.0130	LinJ.01.0130	transcript	LinJ.01.0130:mRNA	protein_coding	2019-01-01	c.637G>C	p.Ala213Pro	637/1095	637/1095	213/364
LinJ.01	42689	.	G	A	.	.	ANN=A	synonymous_variant	LOW	LinJ.01.0170	LinJ.01.0170	transcript	LinJ.01.0170:mRNA	protein_coding	2019-01-01	c.441C>T	p.Cys147Cys	441/1374	441/1374	147/457
LinJ.01	84913	.	G	T	.	.	ANN=T	intergenic_region	MODIFIER	LinJ.01.0350-LinJ.01.0360	LinJ.01.0350-LinJ.01.0360	intergenic_region	LinJ.01.0350-LinJ.01.0360	n.84913G>T
LinJ.01	87967	.	C	T	.	.	ANN=T	intergenic_region	MODIFIER	LinJ.01.0360-LinJ.01.0370	LinJ.01.0360-LinJ.01.0370	intergenic_region	LinJ.01.0360-LinJ.01.0370	n.87967C>T
LinJ.01	87968	.	C	T	.	.	ANN=T	intergenic_region	MODIFIER	LinJ.01.0360-LinJ.01.0370	LinJ.01.0360-LinJ.01.0370	intergenic_region	LinJ.01.0360-LinJ.01.0370	n.87968C>T
LinJ.01	88384	.	G	A	.	.	ANN=A	synonymous_variant	LOW	LinJ.01.0370	LinJ.01.0370	transcript	LinJ.01.0370:mRNA	protein_coding	2019-01-01	c.252G>A	p.Ala84Ala	252/2247	252/2247	84/748
LinJ.01	110642	.	T	G	.	.	ANN=G	missense_variant	MODERATE	LinJ.01.0460	LinJ.01.0460	transcript	LinJ.01.0460:mRNA	protein_coding	2019-01-01	c.952T>G	p.Ser318Ala	952/1767	952/1767	318/588
LinJ.01	144465	.	A	G	.	.	ANN=G	intergenic_region	MODIFIER	LinJ.01.0540-LinJ.01.0550	LinJ.01.0540-LinJ.01.0550	intergenic_region	LinJ.01.0540-LinJ.01.0550	n.144465A>G
LinJ.01	144483	.	C	G	.	.	ANN=G	intergenic_region	MODIFIER	LinJ.01.0540-LinJ.01.0550	LinJ.01.0540-LinJ.01.0550	intergenic_region	LinJ.01.0540-LinJ.01.0550	n.144483C>G
LinJ.01	144501	.	A	G	.	.	ANN=G	intergenic_region	MODIFIER	LinJ.01.0540-LinJ.01.0550	LinJ.01.0540-LinJ.01.0550	intergenic_region	LinJ.01.0540-LinJ.01.0550	n.144501A>G
LinJ.01	145191	.	A	G	.	.	ANN=G	intergenic_region	MODIFIER	LinJ.01.0540-LinJ.01.0550	LinJ.01.0540-LinJ.01.0550	intergenic_region	LinJ.01.0540-LinJ.01.0550	n.145191A>G
LinJ.01	145709	.	C	A	.	.	ANN=A	intergenic_region	MODIFIER	LinJ.01.0540-LinJ.01.0550	LinJ.01.0540-LinJ.01.0550	intergenic_region	LinJ.01.0540-LinJ.01.0550	n.145709C>A
LinJ.01	146167	.	T	C	.	.	ANN=C	intergenic_region	MODIFIER	LinJ.01.0540-LinJ.01.0550	LinJ.01.0540-LinJ.01.0550	intergenic_region	LinJ.01.0540-LinJ.01.0550	n.146167T>C
LinJ.01	147289	.	T	A	.	.	ANN=A	missense_variant	MODERATE	LinJ.01.0550	LinJ.01.0550	transcript	LinJ.01.0550:mRNA	protein_coding	2019-01-01	c.1079T>A	p.Leu360Gln	1079/4857	1079/4857	360/1618
LinJ.01	148693	.	T	C	.	.	ANN=C	missense_variant	MODERATE	LinJ.01.0550	LinJ.01.0550	transcript	LinJ.01.0550:mRNA	protein_coding	2019-01-01	c.2483T>C	p.Val828Ala	2483/4857	2483/4857	828/1618
LinJ.01	148694	.	C	A	.	.	ANN=A	synonymous_variant	LOW	LinJ.01.0550	LinJ.01.0550	transcript	LinJ.01.0550:mRNA	protein_coding	2019-01-01	c.2484C>A	p.Val828Val	2484/4857	2484/4857	828/1618
LinJ.01	152499	.	G	A	.	.	ANN=A	missense_variant	MODERATE	LinJ.01.0560	LinJ.01.0560	transcript	LinJ.01.0560:mRNA	protein_coding	2019-01-01	c.436G>A	p.Val146Met	436/2046	436/2046	146/681
LinJ.01	152555	.	G	C	.	.	ANN=C	synonymous_variant	LOW	LinJ.01.0560	LinJ.01.0560	transcript	LinJ.01.0560:mRNA	protein_coding	2019-01-01	c.492G>C	p.Ser164Ser	492/2046	492/2046	164/681
LinJ.01	154332	.	A	G	.	.	ANN=G	intergenic_region	MODIFIER	LinJ.01.0560-LinJ.01.0570	LinJ.01.0560-LinJ.01.0570	intergenic_region	LinJ.01.0560-LinJ.01.0570	n.154332A>G
LinJ.01	154368	.	C	T	.	.	ANN=T	intergenic_region	MODIFIER	LinJ.01.0560-LinJ.01.0570	LinJ.01.0560-LinJ.01.0570	intergenic_region	LinJ.01.0560-LinJ.01.0570	n.154368C>T
LinJ.01	155508	.	G	T	.	.	ANN=T	intergenic_region	MODIFIER	LinJ.01.0560-LinJ.01.0570	LinJ.01.0560-LinJ.01.0570	intergenic_region	LinJ.01.0560-LinJ.01.0570	n.155508G>T
LinJ.01	155638	.	C	A	.	.	ANN=A	missense_variant	MODERATE	LinJ.01.0570	LinJ.01.0570	transcript	LinJ.01.0570:mRNA	protein_coding	2019-01-01	c.68C>A	p.Ala23Glu	68/864	68/864	23/287
LinJ.01	157561	.	C	A	.	.	ANN=A	intergenic_region	MODIFIER	LinJ.01.0570-LinJ.01.0580	LinJ.01.0570-LinJ.01.0580	intergenic_region	LinJ.01.0570-LinJ.01.0580	n.157561C>A
LinJ.01	157920	.	A	T	.	.	ANN=T	missense_variant	MODERATE	LinJ.01.0580	LinJ.01.0580	transcript	LinJ.01.0580:mRNA	protein_coding	2019-01-01	c.176A>T	p.Asn59Ile	176/1869	176/1869	59/622
LinJ.01	157947	.	C	T	.	.	ANN=T	missense_variant	MODERATE	LinJ.01.0580	LinJ.01.0580	transcript	LinJ.01.0580:mRNA	protein_coding	2019-01-01	c.203C>T	p.Thr68Met	203/1869	203/1869	68/622
LinJ.01	158077	.	G	A	.	.	ANN=A	synonymous_variant	LOW	LinJ.01.0580	LinJ.01.0580	transcript	LinJ.01.0580:mRNA	protein_coding	2019-01-01	c.333G>A	p.Arg111Arg	333/1869	333/1869	111/622
LinJ.01	158387	.	C	T	.	.	ANN=T	missense_variant	MODERATE	LinJ.01.0580	LinJ.01.0580	transcript	LinJ.01.0580:mRNA	protein_coding	2019-01-01	c.643C>T	p.Arg215Cys	643/1869	643/1869	215/622
LinJ.01	159908	.	C	G	.	.	ANN=G	intergenic_region	MODIFIER	LinJ.01.0580-LinJ.01.0590	LinJ.01.0580-LinJ.01.0590	intergenic_region	LinJ.01.0580-LinJ.01.0590	n.159908C>G
LinJ.01	160045	.	G	A	.	.	ANN=A	intergenic_region	MODIFIER	LinJ.01.0580-LinJ.01.0590	LinJ.01.0580-LinJ.01.0590	intergenic_region	LinJ.01.0580-LinJ.01.0590	n.160045G>A
LinJ.01	177725	.	C	G	.	.	ANN=G	intergenic_region	MODIFIER	LinJ.01.0640-LinJ.01.0650	LinJ.01.0640-LinJ.01.0650	intergenic_region	LinJ.01.0640-LinJ.01.0650	n.177725C>G
LinJ.01	183105	.	G	A	.	.	ANN=A	intergenic_region	MODIFIER	LinJ.01.0650-LinJ.01.0660	LinJ.01.0650-LinJ.01.0660	intergenic_region	LinJ.01.0650-LinJ.01.0660	n.183105G>A
LinJ.01	190234	.	C	T	.	.	ANN=T	intergenic_region	MODIFIER	LinJ.01.0670-LinJ.01.0680	LinJ.01.0670-LinJ.01.0680	intergenic_region	LinJ.01.0670-LinJ.01.0680	n.190234C>T
LinJ.01	194972	.	G	A	.	.	ANN=A	synonymous_variant	LOW	LinJ.01.0680	LinJ.01.0680	transcript	LinJ.01.0680:mRNA	protein_coding	2019-01-01	c.4194G>A	p.Leu1398Leu	4194/4647	4194/4647	1398/1548
LinJ.01	198573	.	C	G	.	.	ANN=G	intergenic_region	MODIFIER	LinJ.01.0690-LinJ.01.0700	LinJ.01.0690-LinJ.01.0700	intergenic_region	LinJ.01.0690-LinJ.01.0700	n.198573C>G
LinJ.01	226601	.	A	C	.	.	ANN=C	missense_variant	MODERATE	LinJ.01.0750	LinJ.01.0750	transcript	LinJ.01.0750:mRNA	protein_coding	2019-01-01	c.5782A>C	p.Asn1928His	5782/7029	5782/7029	1928/2342
LinJ.01	230111	.	G	A	.	.	ANN=A	missense_variant	MODERATE	LinJ.01.0760	LinJ.01.0760	transcript	LinJ.01.0760:mRNA	protein_coding	2019-01-01	c.1480G>A	p.Glu494Lys	1480/2265	1480/2265	494/754
LinJ.01	233372	.	C	T	.	.	ANN=T	synonymous_variant	LOW	LinJ.01.0770	LinJ.01.0770	transcript	LinJ.01.0770:mRNA	protein_coding	2019-01-01	c.945C>T	p.Gly315Gly	945/4248	945/4248	315/1415
LinJ.01	234533	.	G	C	.	.	ANN=C	missense_variant	MODERATE	LinJ.01.0770	LinJ.01.0770	transcript	LinJ.01.0770:mRNA	protein_coding	2019-01-01	c.2106G>C	p.Gln702His	2106/4248	2106/4248	702/1415
LinJ.01	236563	.	C	A	.	.	ANN=A	missense_variant	MODERATE	LinJ.01.0770	LinJ.01.0770	transcript	LinJ.01.0770:mRNA	protein_coding	2019-01-01	c.4136C>A	p.Ala1379Asp	4136/4248	4136/4248	1379/1415
LinJ.01	264619	.	T	C	.	.	ANN=C	intergenic_region	MODIFIER
LinJ.01	265217	.	A	G	.	.	ANN=G	intergenic_region	MODIFIER
LinJ.01	266001	.	G	A	.	.	ANN=A	intergenic_region	MODIFIER
LinJ.01	266330	.	A	C	.	.	ANN=C	intergenic_region	MODIFIER
LinJ.01	269734	.	T	C	.	.	ANN=C	intergenic_region	MODIFIER
LinJ.02	7317	.	A	G	.	.	ANN=G	intergenic_region	MODIFIER	LinJ.02.0010-LinJ.02.0020	LinJ.02.0010-LinJ.02.0020	intergenic_region	LinJ.02.0010-LinJ.02.0020	n.7317A>G
LinJ.02	28842	.	T	G	.	.	ANN=G	intergenic_region	MODIFIER	LinJ.02.0080-LinJ.02.0090	LinJ.02.0080-LinJ.02.0090	intergenic_region	LinJ.02.0080-LinJ.02.0090	n.28842T>G
LinJ.02	33540	.	G	T	.	.	ANN=T	intergenic_region	MODIFIER	LinJ.02.0090-LinJ.02.0100	LinJ.02.0090-LinJ.02.0100	intergenic_region	LinJ.02.0090-LinJ.02.0100	n.33540G>T
LinJ.02	35279	.	C	T	.	.	ANN=T	synonymous_variant	LOW	LinJ.02.0100	LinJ.02.0100	transcript	LinJ.02.0100:mRNA	protein_coding	2019-01-01	c.13698G>A	p.Leu4566Leu	13698/14721	13698/14721	4566/4906
LinJ.02	37829	.	C	T	.	.	ANN=T	synonymous_variant	LOW	LinJ.02.0100	LinJ.02.0100	transcript	LinJ.02.0100:mRNA	protein_coding	2019-01-01	c.11148G>A	p.Ala3716Ala	11148/14721	11148/14721	3716/4906
LinJ.02	37906	.	G	A	.	.	ANN=A	missense_variant	MODERATE	LinJ.02.0100	LinJ.02.0100	transcript	LinJ.02.0100:mRNA	protein_coding	2019-01-01	c.11071C>T	p.Arg3691Cys	11071/14721	11071/14721	3691/4906
LinJ.02	41032	.	T	C	.	.	ANN=C	missense_variant	MODERATE	LinJ.02.0100	LinJ.02.0100	transcript	LinJ.02.0100:mRNA	protein_coding	2019-01-01	c.7945A>G	p.Asn2649Asp	7945/14721	7945/14721	2649/4906
LinJ.02	43270	.	A	G	.	.	ANN=G	missense_variant	MODERATE	LinJ.02.0100	LinJ.02.0100	transcript	LinJ.02.0100:mRNA	protein_coding	2019-01-01	c.5707T>C	p.Ser1903Pro	5707/14721	5707/14721	1903/4906
LinJ.02	44889	.	T	G	.	.	ANN=G	missense_variant	MODERATE	LinJ.02.0100	LinJ.02.0100	transcript	LinJ.02.0100:mRNA	protein_coding	2019-01-01	c.4088A>C	p.Glu1363Ala	4088/14721	4088/14721	1363/4906
LinJ.02	46121	.	A	C	.	.	ANN=C	missense_variant	MODERATE	LinJ.02.0100	LinJ.02.0100	transcript	LinJ.02.0100:mRNA	protein_coding	2019-01-01	c.2856T>G	p.Ser952Arg	2856/14721	2856/14721	952/4906
LinJ.02	53852	.	A	G	.	.	ANN=G	synonymous_variant	LOW	LinJ.02.0120	LinJ.02.0120	transcript	LinJ.02.0120:mRNA	protein_coding	2019-01-01	c.129T>C	p.Tyr43Tyr	129/1836	129/1836	43/611
LinJ.02	54399	.	A	G	.	.	ANN=G	intergenic_region	MODIFIER	LinJ.02.0120-LinJ.02.0130	LinJ.02.0120-LinJ.02.0130	intergenic_region	LinJ.02.0120-LinJ.02.0130	n.54399A>G
LinJ.02	54415	.	C	T	.	.	ANN=T	intergenic_region	MODIFIER	LinJ.02.0120-LinJ.02.0130	LinJ.02.0120-LinJ.02.0130	intergenic_region	LinJ.02.0120-LinJ.02.0130	n.54415C>T
LinJ.02	55134	.	A	G	.	.	ANN=G	intergenic_region	MODIFIER	LinJ.02.0120-LinJ.02.0130	LinJ.02.0120-LinJ.02.0130	intergenic_region	LinJ.02.0120-LinJ.02.0130	n.55134A>G
LinJ.02	63558	.	A	G	.	.	ANN=G	intergenic_region	MODIFIER	LinJ.02.0130-LinJ.02.0140	LinJ.02.0130-LinJ.02.0140	intergenic_region	LinJ.02.0130-LinJ.02.0140	n.63558A>G
LinJ.02	66632	.	C	G	.	.	ANN=G	intergenic_region	MODIFIER	LinJ.02.0130-LinJ.02.0140	LinJ.02.0130-LinJ.02.0140	intergenic_region	LinJ.02.0130-LinJ.02.0140	n.66632C>G
LinJ.02	66651	.	G	T	.	.	ANN=T	intergenic_region	MODIFIER	LinJ.02.0130-LinJ.02.0140	LinJ.02.0130-LinJ.02.0140	intergenic_region	LinJ.02.0130-LinJ.02.0140	n.66651G>T
LinJ.02	68209	.	G	T	.	.	ANN=T	intergenic_region	MODIFIER	LinJ.02.0130-LinJ.02.0140	LinJ.02.0130-LinJ.02.0140	intergenic_region	LinJ.02.0130-LinJ.02.0140	n.68209G>T
LinJ.02	68353	.	G	T	.	.	ANN=T	intergenic_region	MODIFIER	LinJ.02.0130-LinJ.02.0140	LinJ.02.0130-LinJ.02.0140	intergenic_region	LinJ.02.0130-LinJ.02.0140	n.68353G>T
LinJ.02	68873	.	G	A	.	.	ANN=A	intergenic_region	MODIFIER	LinJ.02.0130-LinJ.02.0140	LinJ.02.0130-LinJ.02.0140	intergenic_region	LinJ.02.0130-LinJ.02.0140	n.68873G>A
LinJ.02	69082	.	T	C	.	.	ANN=C	intergenic_region	MODIFIER	LinJ.02.0130-LinJ.02.0140	LinJ.02.0130-LinJ.02.0140	intergenic_region	LinJ.02.0130-LinJ.02.0140	n.69082T>C
LinJ.02	69718	.	A	G	.	.	ANN=G	synonymous_variant	LOW	LinJ.02.0140	LinJ.02.0140	transcript	LinJ.02.0140:mRNA	protein_coding	2019-01-01	c.1855T>C	p.Leu619Leu	1855/2454	1855/2454	619/817
LinJ.02	71577	.	G	T	.	.	ANN=T	intergenic_region	MODIFIER	LinJ.02.0140-LinJ.02.0150	LinJ.02.0140-LinJ.02.0150	intergenic_region	LinJ.02.0140-LinJ.02.0150	n.71577G>T
LinJ.02	86033	.	T	C	.	.	ANN=C	intergenic_region	MODIFIER	LinJ.02.0160-LinJ.02.0170	LinJ.02.0160-LinJ.02.0170	intergenic_region	LinJ.02.0160-LinJ.02.0170	n.86033T>C
LinJ.02	96716	.	A	G	.	.	ANN=G	intergenic_region	MODIFIER	LinJ.02.0180-LinJ.02.0190	LinJ.02.0180-LinJ.02.0190	intergenic_region	LinJ.02.0180-LinJ.02.0190	n.96716A>G
LinJ.02	98543	.	G	T	.	.	ANN=T	intergenic_region	MODIFIER	LinJ.02.0180-LinJ.02.0190	LinJ.02.0180-LinJ.02.0190	intergenic_region	LinJ.02.0180-LinJ.02.0190	n.98543G>T
LinJ.02	99853	.	C	T	.	.	ANN=T	intergenic_region	MODIFIER	LinJ.02.0180-LinJ.02.0190	LinJ.02.0180-LinJ.02.0190	intergenic_region	LinJ.02.0180-LinJ.02.0190	n.99853C>T
LinJ.02	106461	.	C	T	.	.	ANN=T	missense_variant	MODERATE	LinJ.02.0200	LinJ.02.0200	transcript	LinJ.02.0200:mRNA	protein_coding	2019-01-01	c.352G>A	p.Val118Met	352/2982	352/2982	118/993
LinJ.02	107225	.	C	T	.	.	ANN=T	intergenic_region	MODIFIER	LinJ.02.0200-LinJ.02.0210	LinJ.02.0200-LinJ.02.0210	intergenic_region	LinJ.02.0200-LinJ.02.0210	n.107225C>T
LinJ.02	107938	.	G	A	.	.	ANN=A	intergenic_region	MODIFIER	LinJ.02.0200-LinJ.02.0210	LinJ.02.0200-LinJ.02.0210	intergenic_region	LinJ.02.0200-LinJ.02.0210	n.107938G>A
LinJ.02	111200	.	T	A	.	.	ANN=A	missense_variant	MODERATE	LinJ.02.0210	LinJ.02.0210	transcript	LinJ.02.0210:mRNA	protein_coding	2019-01-01	c.527A>T	p.Asp176Val	527/2709	527/2709	176/902
LinJ.02	112439	.	A	G	.	.	ANN=G	intergenic_region	MODIFIER	LinJ.02.0210-LinJ.02.0220	LinJ.02.0210-LinJ.02.0220	intergenic_region	LinJ.02.0210-LinJ.02.0220	n.112439A>G
LinJ.02	113539	.	G	A	.	.	ANN=A	missense_variant	MODERATE	LinJ.02.0220	LinJ.02.0220	transcript	LinJ.02.0220:mRNA	protein_coding	2019-01-01	c.3295C>T	p.Leu1099Phe	3295/3441	3295/3441	1099/1146
LinJ.02	116571	.	C	T	.	.	ANN=T	missense_variant	MODERATE	LinJ.02.0220	LinJ.02.0220	transcript	LinJ.02.0220:mRNA	protein_coding	2019-01-01	c.263G>A	p.Gly88Glu	263/3441	263/3441	88/1146
LinJ.02	120034	.	A	G	.	.	ANN=G	intergenic_region	MODIFIER	LinJ.02.0230-LinJ.02.0240	LinJ.02.0230-LinJ.02.0240	intergenic_region	LinJ.02.0230-LinJ.02.0240	n.120034A>G
LinJ.02	124695	.	G	T	.	.	ANN=T	missense_variant	MODERATE	LinJ.02.0260	LinJ.02.0260	transcript	LinJ.02.0260:mRNA	protein_coding	2019-01-01	c.1245C>A	p.His415Gln	1245/1593	1245/1593	415/530
LinJ.02	128992	.	G	A	.	.	ANN=A	intergenic_region	MODIFIER	LinJ.02.0260-LinJ.02.0270	LinJ.02.0260-LinJ.02.0270	intergenic_region	LinJ.02.0260-LinJ.02.0270	n.128992G>A
LinJ.02	131334	.	C	T	.	.	ANN=T	missense_variant	MODERATE	LinJ.02.0270	LinJ.02.0270	transcript	LinJ.02.0270:mRNA	protein_coding	2019-02-02	c.7324G>A	p.Val2442Ile	7324/7995	7324/7995	2442/2664
LinJ.02	144775	.	C	T	.	.	ANN=T	intergenic_region	MODIFIER	LinJ.02.0280-LinJ.02.0290	LinJ.02.0280-LinJ.02.0290	intergenic_region	LinJ.02.0280-LinJ.02.0290	n.144775C>T
LinJ.02	154899	.	G	C	.	.	ANN=C	missense_variant	MODERATE	LinJ.02.0310	LinJ.02.0310	transcript	LinJ.02.0310:mRNA	protein_coding	2019-01-01	c.1241C>G	p.Ser414Trp	1241/2919	1241/2919	414/972
LinJ.02	158538	.	G	A	.	.	ANN=A	missense_variant	MODERATE	LinJ.02.0320	LinJ.02.0320	transcript	LinJ.02.0320:mRNA	protein_coding	2019-01-01	c.1949C>T	p.Ala650Val	1949/3186	1949/3186	650/1061
LinJ.02	164346	.	G	A	.	.	ANN=A	intergenic_region	MODIFIER	LinJ.02.0330-LinJ.02.0340	LinJ.02.0330-LinJ.02.0340	intergenic_region	LinJ.02.0330-LinJ.02.0340	n.164346G>A
LinJ.02	166417	.	G	C	.	.	ANN=C	synonymous_variant	LOW	LinJ.02.0340	LinJ.02.0340	transcript	LinJ.02.0340:mRNA	protein_coding	2019-01-01	c.150C>G	p.Ala50Ala	150/1590	150/1590	50/529
LinJ.02	176904	.	A	G	.	.	ANN=G	intergenic_region	MODIFIER	LinJ.02.0380-LinJ.02.0390	LinJ.02.0380-LinJ.02.0390	intergenic_region	LinJ.02.0380-LinJ.02.0390	n.176904A>G
LinJ.02	178692	.	G	A	.	.	ANN=A	synonymous_variant	LOW	LinJ.02.0390	LinJ.02.0390	transcript	LinJ.02.0390:mRNA	protein_coding	2019-01-01	c.2337C>T	p.Ile779Ile	2337/3060	2337/3060	779/1019
LinJ.02	205343	.	G	A	.	.	ANN=A	missense_variant	MODERATE	LinJ.02.0440	LinJ.02.0440	transcript	LinJ.02.0440:mRNA	protein_coding	2019-01-01	c.4679C>T	p.Ala1560Val	4679/10752	4679/10752	1560/3583
LinJ.02	206076	.	T	C	.	.	ANN=C	missense_variant	MODERATE	LinJ.02.0440	LinJ.02.0440	transcript	LinJ.02.0440:mRNA	protein_coding	2019-01-01	c.3946A>G	p.Asn1316Asp	3946/10752	3946/10752	1316/3583
LinJ.02	217599	.	G	A	.	.	ANN=A	missense_variant	MODERATE	LinJ.02.0470	LinJ.02.0470	transcript	LinJ.02.0470:mRNA	protein_coding	2019-01-01	c.2476C>T	p.Arg826Cys	2476/2850	2476/2850	826/949
LinJ.02	223258	.	C	T	.	.	ANN=T	intergenic_region	MODIFIER	LinJ.02.0480-LinJ.02.0490	LinJ.02.0480-LinJ.02.0490	intergenic_region	LinJ.02.0480-LinJ.02.0490	n.223258C>T
LinJ.02	223637	.	G	A	.	.	ANN=A	missense_variant	MODERATE	LinJ.02.0490	LinJ.02.0490	transcript	LinJ.02.0490:mRNA	protein_coding	2019-01-01	c.6182C>T	p.Pro2061Leu	6182/6276	6182/6276	2061/2091
LinJ.02	224199	.	G	A	.	.	ANN=A	missense_variant	MODERATE	LinJ.02.0490	LinJ.02.0490	transcript	LinJ.02.0490:mRNA	protein_coding	2019-01-01	c.5620C>T	p.Arg1874Cys	5620/6276	5620/6276	1874/2091
LinJ.02	233736	.	G	C	.	.	ANN=C	intergenic_region	MODIFIER	LinJ.02.0490-LinJ.02.0500	LinJ.02.0490-LinJ.02.0500	intergenic_region	LinJ.02.0490-LinJ.02.0500	n.233736G>C
LinJ.02	266853	.	C	T	.	.	ANN=T	intergenic_region	MODIFIER	LinJ.02.0540-LinJ.02.0550	LinJ.02.0540-LinJ.02.0550	intergenic_region	LinJ.02.0540-LinJ.02.0550	n.266853C>T
LinJ.02	267637	.	A	G	.	.	ANN=G	missense_variant	MODERATE	LinJ.02.0550	LinJ.02.0550	transcript	LinJ.02.0550:mRNA	protein_coding	2019-01-01	c.152A>G	p.His51Arg	152/11367	152/11367	51/3788
LinJ.03	2576	.	A	C	.	.	ANN=C	intergenic_region	MODIFIER	LinJ.03.0010	LinJ.03.0010	intergenic_region	LinJ.03.0010	n.2576A>C
LinJ.03	3897	.	T	C	.	.	ANN=C	missense_variant	MODERATE	LinJ.03.0010	LinJ.03.0010	transcript	LinJ.03.0010:mRNA	protein_coding	2019-01-01	c.2818A>G	p.Ser940Gly	2818/3030	2818/3030	940/1009
LinJ.03	5079	.	C	A	.	.	ANN=A	missense_variant	MODERATE	LinJ.03.0010	LinJ.03.0010	transcript	LinJ.03.0010:mRNA	protein_coding	2019-01-01	c.1636G>T	p.Val546Leu	1636/3030	1636/3030	546/1009
LinJ.03	6196	.	T	C	.	.	ANN=C	synonymous_variant	LOW	LinJ.03.0010	LinJ.03.0010	transcript	LinJ.03.0010:mRNA	protein_coding	2019-01-01	c.519A>G	p.Lys173Lys	519/3030	519/3030	173/1009
LinJ.03	7620	.	C	T	.	.	ANN=T	intergenic_region	MODIFIER	LinJ.03.0010-LinJ.03.0020	LinJ.03.0010-LinJ.03.0020	intergenic_region	LinJ.03.0010-LinJ.03.0020	n.7620C>T
LinJ.03	9110	.	G	C	.	.	ANN=C	intergenic_region	MODIFIER	LinJ.03.0020-LinJ.03.0030	LinJ.03.0020-LinJ.03.0030	intergenic_region	LinJ.03.0020-LinJ.03.0030	n.9110G>C
LinJ.03	9489	.	A	G	.	.	ANN=G	intergenic_region	MODIFIER	LinJ.03.0020-LinJ.03.0030	LinJ.03.0020-LinJ.03.0030	intergenic_region	LinJ.03.0020-LinJ.03.0030	n.9489A>G
LinJ.03	10257	.	C	T	.	.	ANN=T	synonymous_variant	LOW	LinJ.03.0030	LinJ.03.0030	transcript	LinJ.03.0030:mRNA	protein_coding	2019-01-01	c.726C>T	p.Asp242Asp	726/1224	726/1224	242/407
LinJ.03	12479	.	G	A	.	.	ANN=A	synonymous_variant	LOW	LinJ.03.0040	LinJ.03.0040	transcript	LinJ.03.0040:mRNA	protein_coding	2019-01-01	c.786G>A	p.Lys262Lys	786/1146	786/1146	262/381
LinJ.03	13094	.	A	G	.	.	ANN=G	intergenic_region	MODIFIER	LinJ.03.0040-LinJ.03.0050	LinJ.03.0040-LinJ.03.0050	intergenic_region	LinJ.03.0040-LinJ.03.0050	n.13094A>G
LinJ.03	15064	.	C	T	.	.	ANN=T	intergenic_region	MODIFIER	LinJ.03.0040-LinJ.03.0050	LinJ.03.0040-LinJ.03.0050	intergenic_region	LinJ.03.0040-LinJ.03.0050	n.15064C>T
LinJ.03	15513	.	A	G	.	.	ANN=G	intergenic_region	MODIFIER	LinJ.03.0040-LinJ.03.0050	LinJ.03.0040-LinJ.03.0050	intergenic_region	LinJ.03.0040-LinJ.03.0050	n.15513A>G
LinJ.03	31764	.	G	T	.	.	ANN=T	missense_variant	MODERATE	LinJ.03.0100	LinJ.03.0100	transcript	LinJ.03.0100:mRNA	protein_coding	2019-01-01	c.2590G>T	p.Ala864Ser	2590/2676	2590/2676	864/891
LinJ.03	32830	.	G	T	.	.	ANN=T	missense_variant	MODERATE	LinJ.03.0110	LinJ.03.0110	transcript	LinJ.03.0110:mRNA	protein_coding	2019-01-01	c.233G>T	p.Arg78Leu	233/2778	233/2778	78/925
LinJ.03	34844	.	G	A	.	.	ANN=A	synonymous_variant	LOW	LinJ.03.0110	LinJ.03.0110	transcript	LinJ.03.0110:mRNA	protein_coding	2019-01-01	c.2247G>A	p.Ala749Ala	2247/2778	2247/2778	749/925
LinJ.03	51215	.	G	A	.	.	ANN=A	synonymous_variant	LOW	LinJ.03.0190	LinJ.03.0190	transcript	LinJ.03.0190:mRNA	protein_coding	2019-01-01	c.720G>A	p.Ala240Ala	720/1683	720/1683	240/560
LinJ.03	61605	.	A	G	.	.	ANN=G	intergenic_region	MODIFIER	LinJ.03.0220-LinJ.03.0230	LinJ.03.0220-LinJ.03.0230	intergenic_region	LinJ.03.0220-LinJ.03.0230	n.61605A>G
LinJ.03	64792	.	C	T	.	.	ANN=T	intergenic_region	MODIFIER	LinJ.03.0240-LinJ.03.0250	LinJ.03.0240-LinJ.03.0250	intergenic_region	LinJ.03.0240-LinJ.03.0250	n.64792C>T
LinJ.03	65304	.	A	G	.	.	ANN=G	intergenic_region	MODIFIER	LinJ.03.0240-LinJ.03.0250	LinJ.03.0240-LinJ.03.0250	intergenic_region	LinJ.03.0240-LinJ.03.0250	n.65304A>G
LinJ.03	65369	.	C	T	.	.	ANN=T	intergenic_region	MODIFIER	LinJ.03.0240-LinJ.03.0250	LinJ.03.0240-LinJ.03.0250	intergenic_region	LinJ.03.0240-LinJ.03.0250	n.65369C>T
LinJ.03	74686	.	G	T	.	.	ANN=T	intergenic_region	MODIFIER	LinJ.03.0260-LinJ.03.0270	LinJ.03.0260-LinJ.03.0270	intergenic_region	LinJ.03.0260-LinJ.03.0270	n.74686G>T
LinJ.03	78559	.	G	A	.	.	ANN=A	intergenic_region	MODIFIER	LinJ.03.0270-LinJ.03.0280	LinJ.03.0270-LinJ.03.0280	intergenic_region	LinJ.03.0270-LinJ.03.0280	n.78559G>A
LinJ.03	86103	.	T	C	.	.	ANN=C	missense_variant	MODERATE	LinJ.03.0290	LinJ.03.0290	transcript	LinJ.03.0290:mRNA	protein_coding	2019-01-01	c.1316T>C	p.Leu439Ser	1316/6219	1316/6219	439/2072
LinJ.03	88633	.	G	A	.	.	ANN=A	synonymous_variant	LOW	LinJ.03.0290	LinJ.03.0290	transcript	LinJ.03.0290:mRNA	protein_coding	2019-01-01	c.3846G>A	p.Arg1282Arg	3846/6219	3846/6219	1282/2072
LinJ.03	99331	.	A	G	.	.	ANN=G	missense_variant	MODERATE	LinJ.03.0320	LinJ.03.0320	transcript	LinJ.03.0320:mRNA	protein_coding	2019-01-01	c.197A>G	p.Asp66Gly	197/1029	197/1029	66/342
LinJ.03	105616	.	C	T	.	.	ANN=T	missense_variant	MODERATE	LinJ.03.0330	LinJ.03.0330	transcript	LinJ.03.0330:mRNA	protein_coding	2019-01-01	c.4121C>T	p.Ala1374Val	4121/4365	4121/4365	1374/1454
LinJ.03	110632	.	G	T	.	.	ANN=T	missense_variant	MODERATE	LinJ.03.0340	LinJ.03.0340	transcript	LinJ.03.0340:mRNA	protein_coding	2019-01-01	c.619G>T	p.Asp207Tyr	619/4956	619/4956	207/1651
LinJ.03	112047	.	T	C	.	.	ANN=C	synonymous_variant	LOW	LinJ.03.0340	LinJ.03.0340	transcript	LinJ.03.0340:mRNA	protein_coding	2019-01-01	c.2034T>C	p.Ser678Ser	2034/4956	2034/4956	678/1651
LinJ.03	121986	.	C	A	.	.	ANN=A	synonymous_variant	LOW	LinJ.03.0360	LinJ.03.0360	transcript	LinJ.03.0360:mRNA	protein_coding	2019-01-01	c.6C>A	p.Ser2Ser	6/1113	6/1113	2/370
LinJ.03	122324	.	G	A	.	.	ANN=A	missense_variant	MODERATE	LinJ.03.0360	LinJ.03.0360	transcript	LinJ.03.0360:mRNA	protein_coding	2019-01-01	c.344G>A	p.Cys115Tyr	344/1113	344/1113	115/370
LinJ.03	131580	.	C	A	.	.	ANN=A	intergenic_region	MODIFIER	LinJ.03.0380-LinJ.03.0390	LinJ.03.0380-LinJ.03.0390	intergenic_region	LinJ.03.0380-LinJ.03.0390	n.131580C>A
LinJ.03	134268	.	G	T	.	.	ANN=T	intergenic_region	MODIFIER	LinJ.03.0390-LinJ.03.0400	LinJ.03.0390-LinJ.03.0400	intergenic_region	LinJ.03.0390-LinJ.03.0400	n.134268G>T
LinJ.03	141209	.	G	A	.	.	ANN=A	missense_variant	MODERATE	LinJ.03.0400	LinJ.03.0400	transcript	LinJ.03.0400:mRNA	protein_coding	2019-01-01	c.4158G>A	p.Met1386Ile	4158/5016	4158/5016	1386/1671
LinJ.03	142038	.	C	G	.	.	ANN=G	missense_variant	MODERATE	LinJ.03.0400	LinJ.03.0400	transcript	LinJ.03.0400:mRNA	protein_coding	2019-01-01	c.4987C>G	p.Leu1663Val	4987/5016	4987/5016	1663/1671
LinJ.03	145044	.	T	C	.	.	ANN=C	intergenic_region	MODIFIER	LinJ.03.0420-LinJ.03.0430	LinJ.03.0420-LinJ.03.0430	intergenic_region	LinJ.03.0420-LinJ.03.0430	n.145044T>C
LinJ.03	145437	.	C	T	.	.	ANN=T	intergenic_region	MODIFIER	LinJ.03.0420-LinJ.03.0430	LinJ.03.0420-LinJ.03.0430	intergenic_region	LinJ.03.0420-LinJ.03.0430	n.145437C>T
LinJ.03	152702	.	A	G	.	.	ANN=G	intergenic_region	MODIFIER	LinJ.03.0430-LinJ.03.0440	LinJ.03.0430-LinJ.03.0440	intergenic_region	LinJ.03.0430-LinJ.03.0440	n.152702A>G
LinJ.03	159635	.	C	T	.	.	ANN=T	synonymous_variant	LOW	LinJ.03.0440	LinJ.03.0440	transcript	LinJ.03.0440:mRNA	protein_coding	2019-01-01	c.2713C>T	p.Leu905Leu	2713/3183	2713/3183	905/1060
LinJ.03	165029	.	G	T	.	.	ANN=T	missense_variant	MODERATE	LinJ.03.0450	LinJ.03.0450	transcript	LinJ.03.0450:mRNA	protein_coding	2019-01-01	c.4G>T	p.Ala2Ser	2874-04-01	2874-04-01	2/957
LinJ.03	165080	.	T	C	.	.	ANN=C	missense_variant	MODERATE	LinJ.03.0450	LinJ.03.0450	transcript	LinJ.03.0450:mRNA	protein_coding	2019-01-01	c.55T>C	p.Ser19Pro	55/2874	55/2874	19/957
LinJ.03	173019	.	C	A	.	.	ANN=A	intergenic_region	MODIFIER	LinJ.03.0460-LinJ.03.0470	LinJ.03.0460-LinJ.03.0470	intergenic_region	LinJ.03.0460-LinJ.03.0470	n.173019C>A
LinJ.03	174620	.	G	A	.	.	ANN=A	missense_variant	MODERATE	LinJ.03.0470	LinJ.03.0470	transcript	LinJ.03.0470:mRNA	protein_coding	2019-01-01	c.413G>A	p.Gly138Asp	413/3075	413/3075	138/1024
LinJ.03	205599	.	G	A	.	.	ANN=A	intergenic_region	MODIFIER	LinJ.03.0520-LinJ.03.0530	LinJ.03.0520-LinJ.03.0530	intergenic_region	LinJ.03.0520-LinJ.03.0530	n.205599G>A
LinJ.03	205659	.	G	C	.	.	ANN=C	intergenic_region	MODIFIER	LinJ.03.0520-LinJ.03.0530	LinJ.03.0520-LinJ.03.0530	intergenic_region	LinJ.03.0520-LinJ.03.0530	n.205659G>C
LinJ.03	205665	.	C	T	.	.	ANN=T	intergenic_region	MODIFIER	LinJ.03.0520-LinJ.03.0530	LinJ.03.0520-LinJ.03.0530	intergenic_region	LinJ.03.0520-LinJ.03.0530	n.205665C>T
LinJ.03	205710	.	G	A	.	.	ANN=A	intergenic_region	MODIFIER	LinJ.03.0520-LinJ.03.0530	LinJ.03.0520-LinJ.03.0530	intergenic_region	LinJ.03.0520-LinJ.03.0530	n.205710G>A
LinJ.03	205933	.	T	C	.	.	ANN=C	intergenic_region	MODIFIER	LinJ.03.0520-LinJ.03.0530	LinJ.03.0520-LinJ.03.0530	intergenic_region	LinJ.03.0520-LinJ.03.0530	n.205933T>C
LinJ.03	218580	.	C	T	.	.	ANN=T	intergenic_region	MODIFIER	LinJ.03.0550-LinJ.03.0560	LinJ.03.0550-LinJ.03.0560	intergenic_region	LinJ.03.0550-LinJ.03.0560	n.218580C>T
LinJ.03	221283	.	C	T	.	.	ANN=T	synonymous_variant	LOW	LinJ.03.0570	LinJ.03.0570	transcript	LinJ.03.0570:mRNA	protein_coding	2019-01-01	c.108C>T	p.Pro36Pro	108/4038	108/4038	36/1345
LinJ.03	221604	.	G	C	.	.	ANN=C	synonymous_variant	LOW	LinJ.03.0570	LinJ.03.0570	transcript	LinJ.03.0570:mRNA	protein_coding	2019-01-01	c.429G>C	p.Leu143Leu	429/4038	429/4038	143/1345
LinJ.03	225386	.	C	A	.	.	ANN=A	intergenic_region	MODIFIER	LinJ.03.0570-LinJ.03.0580	LinJ.03.0570-LinJ.03.0580	intergenic_region	LinJ.03.0570-LinJ.03.0580	n.225386C>A
LinJ.03	227285	.	A	C	.	.	ANN=C	intergenic_region	MODIFIER	LinJ.03.0580-LinJ.03.0590	LinJ.03.0580-LinJ.03.0590	intergenic_region	LinJ.03.0580-LinJ.03.0590	n.227285A>C
LinJ.03	230852	.	A	G	.	.	ANN=G	missense_variant	MODERATE	LinJ.03.0600	LinJ.03.0600	transcript	LinJ.03.0600:mRNA	protein_coding	2019-01-01	c.806A>G	p.Lys269Arg	806/2028	806/2028	269/675
LinJ.03	231467	.	A	G	.	.	ANN=G	missense_variant	MODERATE	LinJ.03.0600	LinJ.03.0600	transcript	LinJ.03.0600:mRNA	protein_coding	2019-01-01	c.1421A>G	p.Glu474Gly	1421/2028	1421/2028	474/675
LinJ.03	232078	.	A	G	.	.	ANN=G	intergenic_region	MODIFIER	LinJ.03.0600-LinJ.03.0610	LinJ.03.0600-LinJ.03.0610	intergenic_region	LinJ.03.0600-LinJ.03.0610	n.232078A>G
LinJ.03	232990	.	G	A	.	.	ANN=A	intergenic_region	MODIFIER	LinJ.03.0600-LinJ.03.0610	LinJ.03.0600-LinJ.03.0610	intergenic_region	LinJ.03.0600-LinJ.03.0610	n.232990G>A
LinJ.03	234377	.	G	A	.	.	ANN=A	synonymous_variant	LOW	LinJ.03.0610	LinJ.03.0610	transcript	LinJ.03.0610:mRNA	protein_coding	2019-01-01	c.678G>A	p.Glu226Glu	678/987	678/987	226/328
LinJ.03	234656	.	A	C	.	.	ANN=C	missense_variant	MODERATE	LinJ.03.0610	LinJ.03.0610	transcript	LinJ.03.0610:mRNA	protein_coding	2019-01-01	c.957A>C	p.Glu319Asp	957/987	957/987	319/328
LinJ.03	235631	.	A	G	.	.	ANN=G	synonymous_variant	LOW	LinJ.03.0620	LinJ.03.0620	transcript	LinJ.03.0620:mRNA	protein_coding	2019-01-01	c.204A>G	p.Ala68Ala	204/1827	204/1827	68/608
LinJ.03	238080	.	A	G	.	.	ANN=G	intergenic_region	MODIFIER	LinJ.03.0620-LinJ.03.0630	LinJ.03.0620-LinJ.03.0630	intergenic_region	LinJ.03.0620-LinJ.03.0630	n.238080A>G
LinJ.03	241605	.	A	G	.	.	ANN=G	missense_variant	MODERATE	LinJ.03.0630	LinJ.03.0630	transcript	LinJ.03.0630:mRNA	protein_coding	2019-01-01	c.1910A>G	p.Gln637Arg	1910/2670	1910/2670	637/889
LinJ.03	262125	.	G	C	.	.	ANN=C	intergenic_region	MODIFIER	LinJ.03.tRNA1-LinJ.03.0670	LinJ.03.tRNA1-LinJ.03.0670	intergenic_region	LinJ.03.tRNA1-LinJ.03.0670	n.262125G>C
LinJ.03	262281	.	G	A	.	.	ANN=A	intergenic_region	MODIFIER	LinJ.03.tRNA1-LinJ.03.0670	LinJ.03.tRNA1-LinJ.03.0670	intergenic_region	LinJ.03.tRNA1-LinJ.03.0670	n.262281G>A
LinJ.03	265694	.	A	T	.	.	ANN=T	synonymous_variant	LOW	LinJ.03.0670	LinJ.03.0670	transcript	LinJ.03.0670:mRNA	protein_coding	2019-01-01	c.3429T>A	p.Val1143Val	3429/6633	3429/6633	1143/2210
LinJ.03	268054	.	C	T	.	.	ANN=T	missense_variant	MODERATE	LinJ.03.0670	LinJ.03.0670	transcript	LinJ.03.0670:mRNA	protein_coding	2019-01-01	c.1069G>A	p.Asp357Asn	1069/6633	1069/6633	357/2210
LinJ.03	270151	.	C	T	.	.	ANN=T	missense_variant	MODERATE	LinJ.03.0680	LinJ.03.0680	transcript	LinJ.03.0680:mRNA	protein_coding	2019-01-01	c.8467G>A	p.Ala2823Thr	8467/8682	8467/8682	2823/2893
LinJ.03	274053	.	A	G	.	.	ANN=G	missense_variant	MODERATE	LinJ.03.0680	LinJ.03.0680	transcript	LinJ.03.0680:mRNA	protein_coding	2019-01-01	c.4565T>C	p.Met1522Thr	4565/8682	4565/8682	1522/2893
LinJ.03	274415	.	T	C	.	.	ANN=C	synonymous_variant	LOW	LinJ.03.0680	LinJ.03.0680	transcript	LinJ.03.0680:mRNA	protein_coding	2019-01-01	c.4203A>G	p.Arg1401Arg	4203/8682	4203/8682	1401/2893
LinJ.03	274445	.	C	T	.	.	ANN=T	synonymous_variant	LOW	LinJ.03.0680	LinJ.03.0680	transcript	LinJ.03.0680:mRNA	protein_coding	2019-01-01	c.4173G>A	p.Pro1391Pro	4173/8682	4173/8682	1391/2893
LinJ.03	274556	.	G	A	.	.	ANN=A	synonymous_variant	LOW	LinJ.03.0680	LinJ.03.0680	transcript	LinJ.03.0680:mRNA	protein_coding	2019-01-01	c.4062C>T	p.Tyr1354Tyr	4062/8682	4062/8682	1354/2893
LinJ.03	274817	.	A	G	.	.	ANN=G	synonymous_variant	LOW	LinJ.03.0680	LinJ.03.0680	transcript	LinJ.03.0680:mRNA	protein_coding	2019-01-01	c.3801T>C	p.Val1267Val	3801/8682	3801/8682	1267/2893
LinJ.03	277808	.	C	T	.	.	ANN=T	synonymous_variant	LOW	LinJ.03.0680	LinJ.03.0680	transcript	LinJ.03.0680:mRNA	protein_coding	2019-01-01	c.810G>A	p.Ser270Ser	810/8682	810/8682	270/2893
LinJ.03	277812	.	A	G	.	.	ANN=G	missense_variant	MODERATE	LinJ.03.0680	LinJ.03.0680	transcript	LinJ.03.0680:mRNA	protein_coding	2019-01-01	c.806T>C	p.Leu269Pro	806/8682	806/8682	269/2893
LinJ.03	277894	.	G	A	.	.	ANN=A	missense_variant	MODERATE	LinJ.03.0680	LinJ.03.0680	transcript	LinJ.03.0680:mRNA	protein_coding	2019-01-01	c.724C>T	p.Pro242Ser	724/8682	724/8682	242/2893
LinJ.03	278281	.	C	T	.	.	ANN=T	missense_variant	MODERATE	LinJ.03.0680	LinJ.03.0680	transcript	LinJ.03.0680:mRNA	protein_coding	2019-01-01	c.337G>A	p.Ala113Thr	337/8682	337/8682	113/2893
LinJ.03	278795	.	C	G	.	.	ANN=G	intergenic_region	MODIFIER	LinJ.03.0680-LinJ.03.0690	LinJ.03.0680-LinJ.03.0690	intergenic_region	LinJ.03.0680-LinJ.03.0690	n.278795C>G
LinJ.03	279261	.	C	T	.	.	ANN=T	intergenic_region	MODIFIER	LinJ.03.0680-LinJ.03.0690	LinJ.03.0680-LinJ.03.0690	intergenic_region	LinJ.03.0680-LinJ.03.0690	n.279261C>T
LinJ.03	280825	.	G	A	.	.	ANN=A	missense_variant	MODERATE	LinJ.03.0700	LinJ.03.0700	transcript	LinJ.03.0700:mRNA	protein_coding	2019-01-01	c.3251C>T	p.Thr1084Met	3251/3321	3251/3321	1084/1106
LinJ.03	280829	.	T	C	.	.	ANN=C	missense_variant	MODERATE	LinJ.03.0700	LinJ.03.0700	transcript	LinJ.03.0700:mRNA	protein_coding	2019-01-01	c.3247A>G	p.Thr1083Ala	3247/3321	3247/3321	1083/1106
LinJ.03	284918	.	T	C	.	.	ANN=C	intergenic_region	MODIFIER	LinJ.03.0700-LinJ.03.0710	LinJ.03.0700-LinJ.03.0710	intergenic_region	LinJ.03.0700-LinJ.03.0710	n.284918T>C
LinJ.03	284921	.	G	C	.	.	ANN=C	intergenic_region	MODIFIER	LinJ.03.0700-LinJ.03.0710	LinJ.03.0700-LinJ.03.0710	intergenic_region	LinJ.03.0700-LinJ.03.0710	n.284921G>C
LinJ.03	286130	.	C	T	.	.	ANN=T	missense_variant	MODERATE	LinJ.03.0710	LinJ.03.0710	transcript	LinJ.03.0710:mRNA	protein_coding	2019-01-01	c.592G>A	p.Glu198Lys	592/1215	592/1215	198/404
LinJ.03	286214	.	C	T	.	.	ANN=T	missense_variant	MODERATE	LinJ.03.0710	LinJ.03.0710	transcript	LinJ.03.0710:mRNA	protein_coding	2019-01-01	c.508G>A	p.Ala170Thr	508/1215	508/1215	170/404
LinJ.03	286301	.	A	G	.	.	ANN=G	synonymous_variant	LOW	LinJ.03.0710	LinJ.03.0710	transcript	LinJ.03.0710:mRNA	protein_coding	2019-01-01	c.421T>C	p.Leu141Leu	421/1215	421/1215	141/404
LinJ.03	290570	.	G	C	.	.	ANN=C	synonymous_variant	LOW	LinJ.03.0730	LinJ.03.0730	transcript	LinJ.03.0730:mRNA	protein_coding	2019-01-01	c.207C>G	p.Ala69Ala	207/2151	207/2151	69/716
LinJ.03	295200	.	G	A	.	.	ANN=A	intergenic_region	MODIFIER	LinJ.03.0750-LinJ.03.0760	LinJ.03.0750-LinJ.03.0760	intergenic_region	LinJ.03.0750-LinJ.03.0760	n.295200G>A
LinJ.03	305213	.	C	T	.	.	ANN=T	intergenic_region	MODIFIER	LinJ.03.0770-LinJ.03.0780	LinJ.03.0770-LinJ.03.0780	intergenic_region	LinJ.03.0770-LinJ.03.0780	n.305213C>T
LinJ.03	305245	.	T	A	.	.	ANN=A	intergenic_region	MODIFIER	LinJ.03.0770-LinJ.03.0780	LinJ.03.0770-LinJ.03.0780	intergenic_region	LinJ.03.0770-LinJ.03.0780	n.305245T>A
LinJ.03	305256	.	G	C	.	.	ANN=C	intergenic_region	MODIFIER	LinJ.03.0770-LinJ.03.0780	LinJ.03.0770-LinJ.03.0780	intergenic_region	LinJ.03.0770-LinJ.03.0780	n.305256G>C
LinJ.03	305467	.	C	G	.	.	ANN=G	intergenic_region	MODIFIER	LinJ.03.0770-LinJ.03.0780	LinJ.03.0770-LinJ.03.0780	intergenic_region	LinJ.03.0770-LinJ.03.0780	n.305467C>G
LinJ.03	305590	.	G	C	.	.	ANN=C	intergenic_region	MODIFIER	LinJ.03.0770-LinJ.03.0780	LinJ.03.0770-LinJ.03.0780	intergenic_region	LinJ.03.0770-LinJ.03.0780	n.305590G>C
LinJ.03	305732	.	G	A	.	.	ANN=A	intergenic_region	MODIFIER	LinJ.03.0770-LinJ.03.0780	LinJ.03.0770-LinJ.03.0780	intergenic_region	LinJ.03.0770-LinJ.03.0780	n.305732G>A
LinJ.03	305748	.	A	C	.	.	ANN=C	intergenic_region	MODIFIER	LinJ.03.0770-LinJ.03.0780	LinJ.03.0770-LinJ.03.0780	intergenic_region	LinJ.03.0770-LinJ.03.0780	n.305748A>C
LinJ.03	306251	.	G	A	.	.	ANN=A	intergenic_region	MODIFIER	LinJ.03.0770-LinJ.03.0780	LinJ.03.0770-LinJ.03.0780	intergenic_region	LinJ.03.0770-LinJ.03.0780	n.306251G>A
LinJ.03	308486	.	T	C	.	.	ANN=C	intergenic_region	MODIFIER	LinJ.03.0780-LinJ.03.0790	LinJ.03.0780-LinJ.03.0790	intergenic_region	LinJ.03.0780-LinJ.03.0790	n.308486T>C
LinJ.03	308732	.	A	C	.	.	ANN=C	intergenic_region	MODIFIER	LinJ.03.0780-LinJ.03.0790	LinJ.03.0780-LinJ.03.0790	intergenic_region	LinJ.03.0780-LinJ.03.0790	n.308732A>C
LinJ.03	309673	.	G	A	.	.	ANN=A	synonymous_variant	LOW	LinJ.03.0790	LinJ.03.0790	transcript	LinJ.03.0790:mRNA	protein_coding	2019-01-01	c.6345C>T	p.Leu2115Leu	6345/7182	6345/7182	2115/2393
LinJ.03	309779	.	T	C	.	.	ANN=C	missense_variant	MODERATE	LinJ.03.0790	LinJ.03.0790	transcript	LinJ.03.0790:mRNA	protein_coding	2019-01-01	c.6239A>G	p.Asp2080Gly	6239/7182	6239/7182	2080/2393
LinJ.03	311163	.	T	G	.	.	ANN=G	missense_variant	MODERATE	LinJ.03.0790	LinJ.03.0790	transcript	LinJ.03.0790:mRNA	protein_coding	2019-01-01	c.4855A>C	p.Ile1619Leu	4855/7182	4855/7182	1619/2393
LinJ.03	311299	.	G	A	.	.	ANN=A	synonymous_variant	LOW	LinJ.03.0790	LinJ.03.0790	transcript	LinJ.03.0790:mRNA	protein_coding	2019-01-01	c.4719C>T	p.His1573His	4719/7182	4719/7182	1573/2393
LinJ.03	312739	.	G	A	.	.	ANN=A	synonymous_variant	LOW	LinJ.03.0790	LinJ.03.0790	transcript	LinJ.03.0790:mRNA	protein_coding	2019-01-01	c.3279C>T	p.Ser1093Ser	3279/7182	3279/7182	1093/2393
LinJ.03	313045	.	C	T	.	.	ANN=T	synonymous_variant	LOW	LinJ.03.0790	LinJ.03.0790	transcript	LinJ.03.0790:mRNA	protein_coding	2019-01-01	c.2973G>A	p.Ser991Ser	2973/7182	2973/7182	991/2393
LinJ.03	314506	.	T	C	.	.	ANN=C	synonymous_variant	LOW	LinJ.03.0790	LinJ.03.0790	transcript	LinJ.03.0790:mRNA	protein_coding	2019-01-01	c.1512A>G	p.Pro504Pro	1512/7182	1512/7182	504/2393
LinJ.03	315016	.	C	T	.	.	ANN=T	synonymous_variant	LOW	LinJ.03.0790	LinJ.03.0790	transcript	LinJ.03.0790:mRNA	protein_coding	2019-01-01	c.1002G>A	p.Val334Val	1002/7182	1002/7182	334/2393
LinJ.03	315283	.	C	T	.	.	ANN=T	synonymous_variant	LOW	LinJ.03.0790	LinJ.03.0790	transcript	LinJ.03.0790:mRNA	protein_coding	2019-01-01	c.735G>A	p.Gly245Gly	735/7182	735/7182	245/2393
LinJ.03	315672	.	T	C	.	.	ANN=C	missense_variant	MODERATE	LinJ.03.0790	LinJ.03.0790	transcript	LinJ.03.0790:mRNA	protein_coding	2019-01-01	c.346A>G	p.Thr116Ala	346/7182	346/7182	116/2393
LinJ.03	316429	.	C	T	.	.	ANN=T	intergenic_region	MODIFIER	LinJ.03.0790-LinJ.03.0800	LinJ.03.0790-LinJ.03.0800	intergenic_region	LinJ.03.0790-LinJ.03.0800	n.316429C>T
LinJ.03	316526	.	A	G	.	.	ANN=G	intergenic_region	MODIFIER	LinJ.03.0790-LinJ.03.0800	LinJ.03.0790-LinJ.03.0800	intergenic_region	LinJ.03.0790-LinJ.03.0800	n.316526A>G
LinJ.03	316599	.	G	A	.	.	ANN=A	intergenic_region	MODIFIER	LinJ.03.0790-LinJ.03.0800	LinJ.03.0790-LinJ.03.0800	intergenic_region	LinJ.03.0790-LinJ.03.0800	n.316599G>A
LinJ.03	316747	.	A	G	.	.	ANN=G	intergenic_region	MODIFIER	LinJ.03.0790-LinJ.03.0800	LinJ.03.0790-LinJ.03.0800	intergenic_region	LinJ.03.0790-LinJ.03.0800	n.316747A>G
LinJ.03	316907	.	C	T	.	.	ANN=T	intergenic_region	MODIFIER	LinJ.03.0790-LinJ.03.0800	LinJ.03.0790-LinJ.03.0800	intergenic_region	LinJ.03.0790-LinJ.03.0800	n.316907C>T
LinJ.03	316939	.	T	C	.	.	ANN=C	intergenic_region	MODIFIER	LinJ.03.0790-LinJ.03.0800	LinJ.03.0790-LinJ.03.0800	intergenic_region	LinJ.03.0790-LinJ.03.0800	n.316939T>C
LinJ.03	318230	.	C	A	.	.	ANN=A	missense_variant	MODERATE	LinJ.03.0800	LinJ.03.0800	transcript	LinJ.03.0800:mRNA	protein_coding	2019-01-01	c.2393G>T	p.Gly798Val	2393/3282	2393/3282	798/1093
LinJ.03	318231	.	C	A	.	.	ANN=A	missense_variant	MODERATE	LinJ.03.0800	LinJ.03.0800	transcript	LinJ.03.0800:mRNA	protein_coding	2019-01-01	c.2392G>T	p.Gly798Cys	2392/3282	2392/3282	798/1093
LinJ.03	323745	.	T	C	.	.	ANN=C	missense_variant	MODERATE	LinJ.03.0810	LinJ.03.0810	transcript	LinJ.03.0810:mRNA	protein_coding	2019-01-01	c.6374A>G	p.Gln2125Arg	6374/8715	6374/8715	2125/2904
LinJ.03	327284	.	G	A	.	.	ANN=A	synonymous_variant	LOW	LinJ.03.0810	LinJ.03.0810	transcript	LinJ.03.0810:mRNA	protein_coding	2019-01-01	c.2835C>T	p.Asn945Asn	2835/8715	2835/8715	945/2904
LinJ.03	327631	.	C	T	.	.	ANN=T	missense_variant	MODERATE	LinJ.03.0810	LinJ.03.0810	transcript	LinJ.03.0810:mRNA	protein_coding	2019-01-01	c.2488G>A	p.Ala830Thr	2488/8715	2488/8715	830/2904
LinJ.03	327714	.	T	G	.	.	ANN=G	missense_variant	MODERATE	LinJ.03.0810	LinJ.03.0810	transcript	LinJ.03.0810:mRNA	protein_coding	2019-01-01	c.2405A>C	p.Glu802Ala	2405/8715	2405/8715	802/2904
LinJ.03	329885	.	A	G	.	.	ANN=G	synonymous_variant	LOW	LinJ.03.0810	LinJ.03.0810	transcript	LinJ.03.0810:mRNA	protein_coding	2019-01-01	c.234T>C	p.Arg78Arg	234/8715	234/8715	78/2904
LinJ.03	336487	.	T	G	.	.	ANN=G	missense_variant	MODERATE	LinJ.03.0830	LinJ.03.0830	transcript	LinJ.03.0830:mRNA	protein_coding	2019-01-01	c.4058A>C	p.Glu1353Ala	4058/7113	4058/7113	1353/2370
LinJ.03	337915	.	G	T	.	.	ANN=T	missense_variant	MODERATE	LinJ.03.0830	LinJ.03.0830	transcript	LinJ.03.0830:mRNA	protein_coding	2019-01-01	c.2630C>A	p.Ala877Glu	2630/7113	2630/7113	877/2370
LinJ.03	339643	.	G	A	.	.	ANN=A	missense_variant	MODERATE	LinJ.03.0830	LinJ.03.0830	transcript	LinJ.03.0830:mRNA	protein_coding	2019-01-01	c.902C>T	p.Ala301Val	902/7113	902/7113	301/2370
LinJ.03	347087	.	T	C	.	.	ANN=C	missense_variant	MODERATE	LinJ.03.0850	LinJ.03.0850	transcript	LinJ.03.0850:mRNA	protein_coding	2019-01-01	c.2999A>G	p.Gln1000Arg	2999/3228	2999/3228	1000/1075
LinJ.03	348292	.	G	C	.	.	ANN=C	synonymous_variant	LOW	LinJ.03.0850	LinJ.03.0850	transcript	LinJ.03.0850:mRNA	protein_coding	2019-01-01	c.1794C>G	p.Gly598Gly	1794/3228	1794/3228	598/1075
LinJ.03	354084	.	C	A	.	.	ANN=A	missense_variant	MODERATE	LinJ.03.0860	LinJ.03.0860	transcript	LinJ.03.0860:mRNA	protein_coding	2019-01-01	c.3898G>T	p.Val1300Leu	3898/6006	3898/6006	1300/2001
LinJ.03	355617	.	C	A	.	.	ANN=A	missense_variant	MODERATE	LinJ.03.0860	LinJ.03.0860	transcript	LinJ.03.0860:mRNA	protein_coding	2019-01-01	c.2365G>T	p.Asp789Tyr	2365/6006	2365/6006	789/2001
LinJ.03	358390	.	A	G	.	.	ANN=G	intergenic_region	MODIFIER	LinJ.03.0860-LinJ.03.0870	LinJ.03.0860-LinJ.03.0870	intergenic_region	LinJ.03.0860-LinJ.03.0870	n.358390A>G
LinJ.03	358566	.	A	T	.	.	ANN=T	intergenic_region	MODIFIER	LinJ.03.0860-LinJ.03.0870	LinJ.03.0860-LinJ.03.0870	intergenic_region	LinJ.03.0860-LinJ.03.0870	n.358566A>T
LinJ.03	358935	.	A	G	.	.	ANN=G	synonymous_variant	LOW	LinJ.03.0870	LinJ.03.0870	transcript	LinJ.03.0870:mRNA	protein_coding	2019-01-01	c.2025T>C	p.Gly675Gly	2025/2220	2025/2220	675/739
LinJ.03	359462	.	T	G	.	.	ANN=G	missense_variant	MODERATE	LinJ.03.0870	LinJ.03.0870	transcript	LinJ.03.0870:mRNA	protein_coding	2019-01-01	c.1498A>C	p.Ser500Arg	1498/2220	1498/2220	500/739
LinJ.03	360599	.	C	T	.	.	ANN=T	missense_variant	MODERATE	LinJ.03.0870	LinJ.03.0870	transcript	LinJ.03.0870:mRNA	protein_coding	2019-01-01	c.361G>A	p.Ala121Thr	361/2220	361/2220	121/739
LinJ.03	361078	.	T	C	.	.	ANN=C	intergenic_region	MODIFIER	LinJ.03.0870-LinJ.03.0880	LinJ.03.0870-LinJ.03.0880	intergenic_region	LinJ.03.0870-LinJ.03.0880	n.361078T>C
LinJ.03	361129	.	G	T	.	.	ANN=T	intergenic_region	MODIFIER	LinJ.03.0870-LinJ.03.0880	LinJ.03.0870-LinJ.03.0880	intergenic_region	LinJ.03.0870-LinJ.03.0880	n.361129G>T
LinJ.03	361213	.	G	A	.	.	ANN=A	intergenic_region	MODIFIER	LinJ.03.0870-LinJ.03.0880	LinJ.03.0870-LinJ.03.0880	intergenic_region	LinJ.03.0870-LinJ.03.0880	n.361213G>A
LinJ.03	361885	.	A	G	.	.	ANN=G	intergenic_region	MODIFIER	LinJ.03.0870-LinJ.03.0880	LinJ.03.0870-LinJ.03.0880	intergenic_region	LinJ.03.0870-LinJ.03.0880	n.361885A>G
LinJ.03	363015	.	G	C	.	.	ANN=C	missense_variant	MODERATE	LinJ.03.0880	LinJ.03.0880	transcript	LinJ.03.0880:mRNA	protein_coding	2019-01-01	c.1127C>G	p.Ala376Gly	1127/1143	1127/1143	376/380
LinJ.03	364227	.	G	T	.	.	ANN=T	intergenic_region	MODIFIER	LinJ.03.0880-LinJ.03.0890	LinJ.03.0880-LinJ.03.0890	intergenic_region	LinJ.03.0880-LinJ.03.0890	n.364227G>T
LinJ.03	366221	.	G	A	.	.	ANN=A	intergenic_region	MODIFIER	LinJ.03.0890-LinJ.03.0900	LinJ.03.0890-LinJ.03.0900	intergenic_region	LinJ.03.0890-LinJ.03.0900	n.366221G>A
LinJ.03	368455	.	A	T	.	.	ANN=T	intergenic_region	MODIFIER	LinJ.03.0900-LinJ.03.0910	LinJ.03.0900-LinJ.03.0910	intergenic_region	LinJ.03.0900-LinJ.03.0910	n.368455A>T
LinJ.03	369060	.	T	C	.	.	ANN=C	missense_variant	MODERATE	LinJ.03.0910	LinJ.03.0910	transcript	LinJ.03.0910:mRNA	protein_coding	2019-01-01	c.1577A>G	p.Asp526Gly	1577/2094	1577/2094	526/697
LinJ.03	370642	.	T	C	.	.	ANN=C	intergenic_region	MODIFIER	LinJ.03.0910-LinJ.03.0920	LinJ.03.0910-LinJ.03.0920	intergenic_region	LinJ.03.0910-LinJ.03.0920	n.370642T>C
LinJ.03	376659	.	A	G	.	.	ANN=G	intergenic_region	MODIFIER	LinJ.03.0940-LinJ.03.0950	LinJ.03.0940-LinJ.03.0950	intergenic_region	LinJ.03.0940-LinJ.03.0950	n.376659A>G
LinJ.03	376751	.	G	C	.	.	ANN=C	intergenic_region	MODIFIER	LinJ.03.0940-LinJ.03.0950	LinJ.03.0940-LinJ.03.0950	intergenic_region	LinJ.03.0940-LinJ.03.0950	n.376751G>C
LinJ.03	376928	.	T	C	.	.	ANN=C	intergenic_region	MODIFIER	LinJ.03.0940-LinJ.03.0950	LinJ.03.0940-LinJ.03.0950	intergenic_region	LinJ.03.0940-LinJ.03.0950	n.376928T>C
LinJ.03	377077	.	G	T	.	.	ANN=T	intergenic_region	MODIFIER	LinJ.03.0940-LinJ.03.0950	LinJ.03.0940-LinJ.03.0950	intergenic_region	LinJ.03.0940-LinJ.03.0950	n.377077G>T
LinJ.03	377571	.	T	C	.	.	ANN=C	missense_variant	MODERATE	LinJ.03.0950	LinJ.03.0950	transcript	LinJ.03.0950:mRNA	protein_coding	2019-01-01	c.505A>G	p.Ile169Val	505/978	505/978	169/325
LinJ.03	377606	.	G	T	.	.	ANN=T	missense_variant	MODERATE	LinJ.03.0950	LinJ.03.0950	transcript	LinJ.03.0950:mRNA	protein_coding	2019-01-01	c.470C>A	p.Thr157Asn	470/978	470/978	157/325
LinJ.03	377776	.	C	T	.	.	ANN=T	synonymous_variant	LOW	LinJ.03.0950	LinJ.03.0950	transcript	LinJ.03.0950:mRNA	protein_coding	2019-01-01	c.300G>A	p.Ala100Ala	300/978	300/978	100/325
LinJ.03	378139	.	G	T	.	.	ANN=T	intergenic_region	MODIFIER	LinJ.03.0950-LinJ.03.0960	LinJ.03.0950-LinJ.03.0960	intergenic_region	LinJ.03.0950-LinJ.03.0960	n.378139G>T
LinJ.03	379881	.	C	A	.	.	ANN=A	synonymous_variant	LOW	LinJ.03.0960	LinJ.03.0960	transcript	LinJ.03.0960:mRNA	protein_coding	2019-01-01	c.171G>T	p.Val57Val	171/1242	171/1242	57/413
LinJ.03	379890	.	A	T	.	.	ANN=T	synonymous_variant	LOW	LinJ.03.0960	LinJ.03.0960	transcript	LinJ.03.0960:mRNA	protein_coding	2019-01-01	c.162T>A	p.Pro54Pro	162/1242	162/1242	54/413
LinJ.03	379956	.	T	A	.	.	ANN=A	synonymous_variant	LOW	LinJ.03.0960	LinJ.03.0960	transcript	LinJ.03.0960:mRNA	protein_coding	2019-01-01	c.96A>T	p.Pro32Pro	96/1242	96/1242	32/413
LinJ.03	380089	.	A	C	.	.	ANN=C	intergenic_region	MODIFIER
LinJ.03	380131	.	C	A	.	.	ANN=A	intergenic_region	MODIFIER
LinJ.03	380197	.	A	G	.	.	ANN=G	intergenic_region	MODIFIER
LinJ.03	380213	.	C	T	.	.	ANN=T	intergenic_region	MODIFIER
LinJ.03	380300	.	T	G	.	.	ANN=G	intergenic_region	MODIFIER
LinJ.03	380373	.	A	C	.	.	ANN=C	intergenic_region	MODIFIER
LinJ.03	380838	.	A	C	.	.	ANN=C	intergenic_region	MODIFIER
LinJ.03	381165	.	C	A	.	.	ANN=A	intergenic_region	MODIFIER
LinJ.03	381193	.	G	A	.	.	ANN=A	intergenic_region	MODIFIER
LinJ.03	381296	.	C	A	.	.	ANN=A	intergenic_region	MODIFIER
LinJ.04	3539	.	G	C	.	.	ANN=C	intergenic_region	MODIFIER	LinJ.04.0010	LinJ.04.0010	intergenic_region	LinJ.04.0010	n.3539G>C
LinJ.04	4623	.	T	G	.	.	ANN=G	intergenic_region	MODIFIER	LinJ.04.0010	LinJ.04.0010	intergenic_region	LinJ.04.0010	n.4623T>G
LinJ.04	5253	.	T	G	.	.	ANN=G	intergenic_region	MODIFIER	LinJ.04.0010	LinJ.04.0010	intergenic_region	LinJ.04.0010	n.5253T>G
LinJ.04	13038	.	A	G	.	.	ANN=G	intergenic_region	MODIFIER	LinJ.04.0020-LinJ.04.0030	LinJ.04.0020-LinJ.04.0030	intergenic_region	LinJ.04.0020-LinJ.04.0030	n.13038A>G
LinJ.04	22033	.	T	C	.	.	ANN=C	intergenic_region	MODIFIER	LinJ.04.0040-LinJ.04.0050	LinJ.04.0040-LinJ.04.0050	intergenic_region	LinJ.04.0040-LinJ.04.0050	n.22033T>C
[truncated: 10,092 more rows]

## Sheet: SNPeff_Ldon2_7
Marker SNPs for the Ldon2 group, excluding samples of putatively mixed clone origin.
[truncated: 9,133 more rows]

## Sheet: SNPeff_Ldon3star_18
Marker SNPs for the Ldon3 group, excluding samples of putatively mixed clone origin.
[truncated: 13,452 more rows]

[truncated: 5 more sheets: SNPeff_Ldon4_4, SNPeff_Ldon5star_7, SNPeff_Linf1star_43, SNPeff_CH.Linf.nohy_3, SNPeff_CUK.Linf_11]
